# Supplementary material for: Maternal diet-induced obesity during pregnancy alters lipid supply to mouse E18.5 fetuses and changes the cardiac tissue lipidome in a sex-dependent manner
Source: eLife. 2022 Jan 13;11:e69078. doi: 10.7554/eLife.69078 (PMC8794468; doi:10.7554/eLife.69078)
Supplement: Figure 1—source data 1. [file elife-69078-fig1-data1.csv]

Figure 1-source data 1
Figure 1A
Sex specific average fetal body weight at E18.5 (g)
Group	Sex	BW (g)
Control	Male	1.123667
Control	Male	1.2045
Control	Male	1.146333
Control	Male	1.1055
Control	Male	1.086667
Control	Male	1.148286
Obese	Male	0.970333
Obese	Male	1.209333
Obese	Male	0.924
Obese	Male	1.0395
Obese	Male	1.003
Obese	Male	1.021333
Control	Female	1.2625
Control	Female	1.155
Control	Female	1.079667
Control	Female	1.104667
Control	Female	1.070167
Control	Female	1.1682
Control	Female	1.1405
Obese	Female	0.959
Obese	Female	1.108
Obese	Female	0.862667
Obese	Female	0.9328
Obese	Female	0.906333
Obese	Female	0.9832
