# Supplementary material for: Maternal diet-induced obesity during pregnancy alters lipid supply to mouse E18.5 fetuses and changes the cardiac tissue lipidome in a sex-dependent manner
Source: eLife. 2022 Jan 13;11:e69078. doi: 10.7554/eLife.69078 (PMC8794468; doi:10.7554/eLife.69078)
Supplement: Figure 1—source data 2. [file elife-69078-fig1-data2.csv]

Figure 1-source data 2
Figure 1B
Heart weight (mg)
Dam	Sex	Heart weight (mg)
Control	Male	6.3
Control.1	Male	6.7
Control.2	Male	8.2
Control.3	Male	3.7
Control.4	Male	6.7
Control.5	Male	9.1
Control.6	Male	5
Control.7	Male	8.5
Control.8	Male	10.4
Control.9	Male	8.4
Obese	Male	6.1
Obese.1	Male	6
Obese.2	Male	6.2
Obese.3	Male	6.9
Obese.4	Male	5
Obese.5	Male	7.1
Obese.6	Male	7.5
Obese.7	Male	4.7
Obese.8	Male	7.7
Obese.9	Male	7.6
Control	Female	7.2
Control.1	Female	6.1
Control.2	Female	5.3
Control.3	Female	5
Control.4	Female	4.9
Control.5	Female	5.5
Control.6	Female	6.4
Control.7	Female	6
Control.8	Female	5.8
Control.9	Female	7.8
Control.10	Female	8.8
Control.11	Female	9.7
Obese	Female	5.8
Obese.1	Female	7.4
Obese.2	Female	5.8
Obese.3	Female	4.2
Obese.4	Female	5.3
Obese.5	Female	4.2
Obese.6	Female	4.4
Obese.7	Female	7.6
Obese.8	Female	6.4
Obese.9	Female	4.3
Obese.10	Female	8.5
Obese.11	Female	7.4
