# Supplementary material for: Maternal diet-induced obesity during pregnancy alters lipid supply to mouse E18.5 fetuses and changes the cardiac tissue lipidome in a sex-dependent manner
Source: eLife. 2022 Jan 13;11:e69078. doi: 10.7554/eLife.69078 (PMC8794468; doi:10.7554/eLife.69078)
Supplement: Figure 1—source data 3. [file elife-69078-fig1-data3.csv]

Figure 1-source data 3
Figure 1C
Relative heart weight (mg/g)
Dam	Sex	Relative heart weight (mg/g)
Control	Male	4.875689
Control.1	Male	5.35518
Control.2	Male	6.460326
Control.3	Male	3.208742
Control.4	Male	5.80805
Control.5	Male	7.728894
Control.6	Male	4.770537
Control.7	Male	7.146289
Control.8	Male	9.044352
Control.9	Male	7.149612
Obese	Male	6.995413
Obese.1	Male	6.802121
Obese.2	Male	5.577769
Obese.3	Male	7.340426
Obese.4	Male	5.489981
Obese.5	Male	NA*
Obese.6	Male	7.279983
Obese.7	Male	5.908234
Obese.8	Male	8.276603
Obese.9	Male	7.790306
Control	Female	5.572216
Control.1	Female	4.875612
Control.2	Female	4.864865
Control.3	Female	4.758883
Control.4	Female	4.846154
Control.5	Female	4.604162
Control.6	Female	5.456612
Control.7	Female	5.235602
Control.8	Female	NA*
Control.9	Female	6.557771
Control.10	Female	7.652913
Control.11	Female	8.2561
Obese	Female	6.651376
Obese.1	Female	8.389283
Obese.2	Female	5.92845
Obese.3	Female	4.663765
Obese.4	Female	5.167931
Obese.5	Female	4.319718
Obese.6	Female	4.066543
Obese.7	Female	7.407407
Obese.8	Female	6.808511
Obese.9	Female	NA*
Obese.10	Female	NA*
Obese.11	Female	7.954138
* Average litter weight is missing
