# Supplementary material for: Maternal diet-induced obesity during pregnancy alters lipid supply to mouse E18.5 fetuses and changes the cardiac tissue lipidome in a sex-dependent manner
Source: eLife. 2022 Jan 13;11:e69078. doi: 10.7554/eLife.69078 (PMC8794468; doi:10.7554/eLife.69078)
Supplement: Figure 1—source data 5. [file elife-69078-fig1-data5.csv]

Figure 1-figure source 5
Figure 1F
Right ventricle wall volume (mm3)
Male_CTL	Male_OB	Female_CTL	Female_OB
1.4544	1.1376	0.9324	0.8514
1.401516	0.9936	1.3482	0.956448
0.9792	1.03086	1.053	0.814176
1.3986	1.097208	1.064664	1.01916
	1.086012		1.028862
	1.29195
