# Supplementary material for: Maternal diet-induced obesity during pregnancy alters lipid supply to mouse E18.5 fetuses and changes the cardiac tissue lipidome in a sex-dependent manner
Source: eLife. 2022 Jan 13;11:e69078. doi: 10.7554/eLife.69078 (PMC8794468; doi:10.7554/eLife.69078)
Supplement: Figure 1—source data 8. [file elife-69078-fig1-data8.csv]

Figure 1-figure source 8
Figure 1I
Cardiomyocyte area (�m�)
Each well represents a pool of cardyomyocytes isolated from one heart
Sex	Group	Display	Row	Column	Plane	Timepoint	Time [s]	Field	Object ID	X	Y	Position X [�m]	Position Y [�m]	Bounding Box	Single Nucleated Cells - Cell Area [�m�]	Single Nucleated Cells - Cell Roundness	Single Nucleated Cells - Cell Ratio Width to Length	Single Nucleated Cells - Intensity Cell DAPI Mean	Single Nucleated Cells - Object No in Cells	Single Nucleated Cells - Number of Nuclei- per Cell	Single Nucleated Cells - Intensity Nucleus DAPI Mean- Mean per Cell	Single Nucleated Cells - Intensity Nucleus DAPI Median- Mean per Cell	Single Nucleated Cells - Intensity Nucleus DAPI Maximum- Mean per Cell	Single Nucleated Cells - Intensity Nucleus DAPI Minimum- Mean per Cell	Single Nucleated Cells - Intensity Nucleus DAPI Sum- Mean per Cell	Single Nucleated Cells - Object No in Cells Selected	Single Nucleated Cells - Object No in Nucleated Filtered Cells	Compound	Concentration	Cell Type	Cell Count
Male	Control	TRUE	A	1	1	0	0	1	1	50	329	-290	125	[39,316,62,342]	162.4	0.962	0.7887	2235	1	1	5975	6191	9842	2283	842479	1	1
Male	Control	TRUE	A	1	1	0	0	1	2	988	664	266	-74	[976,652,1001,677]	160.3	1.004	0.8014	1929	2	1	4456	4763	7855	1601	757476	2	2
Male	Control	TRUE	A	1	1	0	0	1	3	261	825	-163	-170	[249,815,279,836]	175.1	0.9283	0.5905	1953	4	1	6314	6064	11999	2824	732475	4	3
Male	Control	TRUE	A	1	1	0	0	1	4	62	832	-283	-176	[51,822,74,851]	184.6	0.9433	0.6154	1973	5	1	4518	4509	8023	1940	429234	5	4
Male	Control	TRUE	A	1	1	0	0	1	5	861	1005	192	-276	[850,995,877,1016]	154.3	0.9488	0.6333	2061	6	1	5317	5250	9554	2151	739122	6	5
Male	Control	TRUE	A	1	1	0	0	2	1	525	618	-654	2536	[516,609,536,628]	117.1	0.985	0.7694	3600	2	1	9928	9772	18712	4021	992838	2	1
Male	Control	TRUE	A	1	1	0	0	2	2	264	708	-809	2485	[254,690,275,722]	179	0.912	0.5153	2135	4	1	6709	6878	10760	2410	892311	3	2
Male	Control	TRUE	A	1	1	0	0	2	3	1019	970	-361	2328	[1007,954,1031,986]	219.7	0.9578	0.7082	852.9	5	1	2799	2638	6057	1143	380707	4	3
Male	Control	TRUE	A	1	1	0	0	2	4	211	594	-841	2550	[199,582,223,609]	191.6	0.9645	0.8423	2665	7	1	6438	5584	13829	3807	1036450	6	4
Male	Control	TRUE	A	1	1	0	0	3	1	156	318	-228	2714	[141,307,170,330]	187.4	0.9375	0.6902	2471	1	1	8774	9284	14188	3207	1052930	1	1
Male	Control	TRUE	A	1	1	0	0	3	2	121	360	-249	2689	[107,348,134,374]	179.7	0.9728	0.6496	2658	2	1	8801	9030	15158	3714	1100110	2	2
Male	Control	TRUE	A	1	1	0	0	3	3	959	755	249	2454	[948,741,971,774]	186.3	0.8806	0.47	1977	3	1	6710	6605	13073	2562	845420	3	3
Male	Control	TRUE	A	1	1	0	0	4	1	607	116	687	2834	[596,107,622,127]	152.2	0.9572	0.6582	2714	1	1	8318	7907	16154	4346	848480	1	1
Male	Control	TRUE	A	1	1	0	0	4	2	1037	239	940	2761	[1025,221,1047,257]	206.7	0.9108	0.5085	1897	3	1	5676	6076	9740	2077	908128	3	2
Male	Control	TRUE	A	1	1	0	0	4	3	146	566	413	2568	[131,554,164,578]	204.3	0.972	0.6064	2015	5	1	8088	8334	13596	3168	930119	5	3
Male	Control	TRUE	A	1	1	0	0	4	4	567	613	662	2540	[556,602,578,624]	137.8	0.9861	0.6932	1702	7	1	3795	3461	7505	1724	516127	7	4
Male	Control	TRUE	A	1	1	0	0	4	5	283	772	494	2445	[273,762,293,783]	121.6	1.008	0.8542	3790	9	1	9274	8850	15870	5825	871784	9	5
Male	Control	TRUE	A	1	1	0	0	4	6	951	934	890	2345	[943,924,960,956]	163.1	0.9038	0.5029	1911	10	1	6220	5885	11271	2382	702828	10	6
Male	Control	TRUE	A	1	1	0	0	5	1	131	120	1697	2186	[120,107,148,135]	189.8	0.9741	0.5795	1685	3	1	5233	4831	9901	2065	695971	2	1
Male	Control	TRUE	A	1	1	0	0	5	2	173	255	1720	2106	[158,244,184,267]	154.7	0.9501	0.6332	2522	4	1	8112	7454	18552	2994	941020	3	2
Male	Control	TRUE	A	1	1	0	0	5	3	517	291	1924	2085	[503,278,530,304]	204.3	0.9866	0.8313	2673	5	1	6158	6053	8571	4776	942110	4	3
Male	Control	TRUE	A	1	1	0	0	5	4	368	460	1835	1984	[356,449,378,472]	127.6	0.9594	0.5917	3175	6	1	7259	6995	12533	3136	965511	5	4
Male	Control	TRUE	A	1	1	0	0	5	5	954	631	2184	1883	[940,617,971,647]	231	0.9336	0.6229	1651	7	1	6243	6512	11242	2298	830311	6	5
Male	Control	TRUE	A	1	1	0	0	5	6	514	636	1923	1880	[505,627,524,645]	107.9	0.9773	0.7818	2336	9	1	5200	4849	10617	2559	556410	8	6
Male	Control	TRUE	A	1	1	0	0	5	7	749	729	2062	1824	[739,720,759,744]	131.8	0.9602	0.6756	1317	10	1	2888	2682	4701	1438	372503	9	7
Male	Control	TRUE	A	1	1	0	0	5	8	551	904	1945	1721	[540,896,564,912]	124.5	0.8937	0.583	2374	11	1	4498	4486	7101	1944	742087	10	8
Male	Control	TRUE	A	1	1	0	0	5	9	1042	945	2236	1695	[1030,933,1054,963]	212.7	0.953	0.7083	1822	12	1	5251	5420	9705	1948	903146	11	9
Male	Control	TRUE	A	1	1	0	0	6	1	91	485	1026	1971	[80,473,107,496]	172.3	0.9193	0.667	2953	1	1	7622	7638	13259	2805	1242400	1	1
Male	Control	TRUE	A	1	1	0	0	6	2	632	872	1346	1740	[620,859,643,886]	170.9	0.9442	0.641	1696	3	1	5611	5980	9450	2051	656472	3	2
Male	Control	TRUE	A	1	1	0	0	6	3	943	216	1532	2129	[931,204,959,229]	205.3	1.005	0.8381	1827	4	1	4995	4985	9249	2307	779177	4	3
Male	Control	TRUE	A	1	1	0	0	7	1	913	573	864	1916	[889,565,926,586]	189.5	0.8068	0.3542	1185	1	1	3961	3611	7336	1807	419860	1	1
Male	Control	TRUE	A	1	1	0	0	8	1	63	160	-282	2162	[54,146,73,173]	143.4	0.9398	0.6168	2904	1	1	9100	9317	15900	3223	1001010	1	1
Male	Control	TRUE	A	1	1	0	0	8	2	684	537	86	1938	[674,528,694,549]	124.5	1.002	0.8321	3356	2	1	6706	7192	10219	2357	1073000	2	2
Male	Control	TRUE	A	1	1	0	0	8	3	655	616	69	1891	[644,605,667,629]	174	0.9546	0.7896	2405	3	1	6183	5609	11651	3294	859435	3	3
Male	Control	TRUE	A	1	1	0	0	8	4	585	783	26	1790	[573,767,596,809]	261.2	0.8427	0.4807	1966	5	1	6459	6041	11985	2660	1098110	5	5
Male	Control	TRUE	A	1	1	0	0	9	1	856	34	-464	2236	[820,23,869,49]	342.8	0.7934	0.4172	864.4	1	1	2987	3017	5961	1187	618406	1	1
Male	Control	TRUE	A	1	1	0	0	9	2	400	185	-729	2147	[388,173,412,198]	169.5	0.8826	0.5917	2749	2	1	8990	9025	16823	3096	1105810	2	2
Male	Control	TRUE	A	1	1	0	0	9	3	787	364	-499	2040	[775,351,798,378]	168.1	0.9817	0.7676	2501	3	1	7764	8334	12941	2868	1001490	3	3
Male	Control	TRUE	A	1	1	0	0	9	4	306	387	-784	2028	[293,376,321,399]	182.5	0.9664	0.6374	2195	4	1	8053	7725	14200	3356	861636	4	4
Male	Control	TRUE	A	1	1	0	0	9	5	1001	539	-373	1937	[990,530,1010,551]	130.1	0.9525	0.7247	3201	5	1	6283	6025	10737	3168	678529	5	5
Male	Control	TRUE	A	1	1	0	0	9	6	482	891	-681	1728	[470,876,495,908]	205	0.8693	0.6081	1586	9	1	5586	5552	10525	2589	653593	9	7
Male	Control	TRUE	A	1	1	0	0	10	1	538	19	-1292	2246	[527,8,552,31]	171.9	0.963	0.7842	2819	1	1	6233	6515	10923	2218	1196770	1	1
Male	Control	TRUE	A	1	1	0	0	10	2	851	105	-1108	2193	[836,90,861,127]	212.7	0.8318	0.4298	1447	2	1	4257	4329	7597	1831	668356	2	2
Male	Control	TRUE	A	1	1	0	0	10	3	468	707	-1334	1838	[457,697,481,718]	153.6	0.9463	0.7708	2093	6	1	6244	5860	12278	2162	724336	4	3
Male	Control	TRUE	A	1	1	0	0	10	4	151	891	-1521	1729	[142,882,165,901]	129.7	0.9875	0.7487	2581	7	1	6648	6105	13559	2792	737953	5	4
Male	Control	TRUE	A	1	1	0	0	11	1	407	236	-2016	2118	[396,224,418,247]	143.4	1.01	0.8317	3321	1	1	9477	8510	18541	4317	1033040	1	1
Male	Control	TRUE	A	1	1	0	0	11	2	49	529	-2228	1943	[40,520,58,540]	111.4	0.9964	0.8009	2988	3	1	7591	6633	14873	3658	751462	3	2
Male	Control	TRUE	A	1	1	0	0	11	3	365	644	-2040	1877	[348,624,387,658]	258.4	0.8276	0.3808	1906	4	1	6983	6929	12907	2865	1082410	4	3
Male	Control	TRUE	A	1	1	0	0	11	4	244	642	-2112	1876	[234,632,256,653]	135	1.031	0.8258	3360	5	1	10499	10626	20312	3949	1081430	5	4
Male	Control	TRUE	A	1	1	0	0	11	5	458	781	-1986	1793	[447,770,470,796]	177.9	0.9827	0.8245	1556	6	1	3606	3436	6176	1600	598578	6	5
Male	Control	TRUE	A	1	1	0	0	12	1	863	189	-1745	1499	[852,175,876,203]	177.2	0.9206	0.6174	2069	2	1	6431	6203	12201	2403	835976	1	1
Male	Control	TRUE	A	1	1	0	0	12	2	998	211	-1663	1487	[986,198,1018,223]	235.9	0.9581	0.7097	1735	3	1	5287	5437	9472	1936	935844	2	2
Male	Control	TRUE	A	1	1	0	0	12	3	643	501	-1875	1314	[632,490,656,513]	157.9	0.9952	0.8258	2747	4	1	7357	7074	13828	2952	963702	3	3
Male	Control	TRUE	A	1	1	0	0	12	4	481	560	-1971	1280	[470,549,497,572]	183.2	0.9686	0.7622	2176	5	1	8090	8231	15140	3208	865649	4	4
Male	Control	TRUE	A	1	1	0	0	12	5	530	662	-1943	1217	[517,649,543,684]	253.8	0.9738	0.6817	1971	7	1	7327	6917	15763	3346	937830	6	5
Male	Control	TRUE	A	1	1	0	0	12	6	542	707	-1933	1190	[528,694,566,725]	274.9	0.8689	0.474	1952	8	1	6433	6010	14754	2374	1215820	7	6
Male	Control	TRUE	A	1	1	0	0	12	7	777	832	-1796	1118	[766,820,791,844]	166.3	0.9441	0.7177	1429	9	1	4791	4584	9392	1994	517464	8	7
Male	Control	TRUE	A	1	1	0	0	12	8	498	864	-1962	1099	[486,852,510,876]	163.5	0.982	0.767	2049	10	1	4496	4293	7589	2094	391162	9	8
Male	Control	TRUE	A	1	1	0	0	12	9	423	943	-2007	1049	[413,934,432,963]	168.4	0.8929	0.5589	1949	11	1	5784	5023	10968	3275	630466	10	9
Male	Control	TRUE	A	1	1	0	0	12	10	222	955	-2126	1046	[211,942,236,966]	157.2	0.9276	0.6554	2085	12	1	6498	6119	12459	3052	656311	11	10
Male	Control	TRUE	A	1	1	0	0	13	1	63	148	-1574	1523	[51,137,74,161]	156.1	1.006	0.7615	2525	1	1	8208	8275	13735	3126	902834	1	1
Male	Control	TRUE	A	1	1	0	0	13	2	507	213	-1308	1485	[498,204,525,223]	150.8	0.9049	0.5919	2254	2	1	8462	8301	15783	3261	736160	2	2
Male	Control	TRUE	A	1	1	0	0	13	3	256	312	-1459	1426	[245,301,268,323]	152.2	0.9911	0.7827	2467	5	1	8193	7878	14671	3294	827516	5	3
Male	Control	TRUE	A	1	1	0	0	13	4	169	336	-1514	1412	[146,325,180,348]	214.5	0.8932	0.5312	2039	6	1	7464	7601	13783	2736	992705	6	4
Male	Control	TRUE	A	1	1	0	0	13	5	462	533	-1337	1295	[450,521,474,546]	180.4	0.9597	0.8645	1825	8	1	4556	4234	8426	1877	728910	8	5
Male	Control	TRUE	A	1	1	0	0	13	6	96	901	-1555	1076	[85,892,105,913]	121.6	0.9879	0.8485	3480	9	1	8879	8485	15318	4066	985573	9	6
Male	Control	TRUE	A	1	1	0	0	13	7	811	944	-1131	1051	[800,933,824,958]	167	1.011	0.7859	1160	10	1	3924	3779	7242	1568	404207	10	7
Male	Control	TRUE	A	1	1	0	0	13	8	73	253	-1568	1462	[60,238,86,266]	207.1	0.9946	0.8393	1611	12	1	3551	3176	7672	1576	713717	12	8
Male	Control	TRUE	A	1	1	0	0	14	1	529	160	-651	1516	[519,150,543,171]	155	0.9678	0.7576	2606	1	1	5733	5541	10622	3921	751026	1	1
Male	Control	TRUE	A	1	1	0	0	14	2	763	161	-514	1512	[752,152,772,183]	178.6	0.925	0.5779	2281	2	1	8326	7601	15683	4179	832576	2	2
Male	Control	TRUE	A	1	1	0	0	14	3	1043	329	-347	1416	[1031,317,1058,342]	193	0.9991	0.7859	2019	3	1	6164	6316	11390	2243	887634	3	3
Male	Control	TRUE	A	1	1	0	0	14	4	721	727	-539	1177	[709,717,731,750]	216.6	0.9234	0.5692	1529	5	1	5471	5588	10053	1968	738591	4	4
Male	Control	TRUE	A	1	1	0	0	14	5	949	820	-402	1125	[940,811,961,830]	121.3	0.9669	0.8048	1526	6	1	3322	3241	5543	1354	425152	5	5
Male	Control	TRUE	A	1	1	0	0	14	6	400	904	-729	1075	[389,887,410,921]	200.7	0.8825	0.4844	1334	7	1	5371	5109	10189	2274	521012	6	6
Male	Control	TRUE	A	1	1	0	0	15	1	18	259	-309	1458	[3,243,34,276]	222.9	0.8668	0.4685	1376	1	1	4763	4992	7854	1723	685842	1	1
Male	Control	TRUE	A	1	1	0	0	16	1	507	440	630	1351	[496,431,529,448]	155.4	0.8504	0.468	1538	2	1	4641	4647	8717	2026	501176	1	1
Male	Control	TRUE	A	1	1	0	0	16	2	705	959	745	1043	[696,951,718,968]	111.1	0.9542	0.7345	2510	3	1	5263	4903	10333	2239	673640	2	2
Male	Control	TRUE	A	1	1	0	0	17	1	934	243	1525	1467	[923,227,945,261]	195.8	0.8457	0.4518	2084	2	1	6693	6993	12692	2450	937015	1	1
Male	Control	TRUE	A	1	1	0	0	17	2	739	399	1410	1375	[729,389,750,409]	120.9	0.9653	0.7551	2250	3	1	5734	5255	11596	3171	550417	2	2
Male	Control	TRUE	A	1	1	0	0	17	3	259	1044	1126	992	[248,1034,271,1055]	148.7	0.9774	0.8014	1171	5	1	3395	2731	8075	1533	332725	4	3
Male	Control	TRUE	A	1	1	0	0	18	1	419	21	1866	1600	[401,6,437,31]	205.3	0.847	0.4773	1878	1	1	7487	7089	15463	2899	816099	1	1
Male	Control	TRUE	A	1	1	0	0	18	2	1047	68	2238	1571	[1038,58,1056,78]	105.8	1.008	0.7656	2033	2	1	3895	3875	6554	2065	475247	2	2
Male	Control	TRUE	A	1	1	0	0	18	3	701	247	2033	1465	[688,235,713,260]	186.3	1.01	0.8703	3212	3	1	7169	7197	11146	3701	1175780	3	3
Male	Control	TRUE	A	1	1	0	0	18	4	542	273	1940	1450	[532,263,554,283]	136.8	0.9815	0.8532	3926	4	1	8221	8009	16112	2732	1389380	4	4
Male	Control	TRUE	A	1	1	0	0	18	5	885	694	2142	1200	[874,683,895,705]	136.1	0.9607	0.6949	2652	6	1	7401	7263	14087	3649	769693	6	5
Male	Control	TRUE	A	1	1	0	0	18	6	376	719	1842	1185	[362,701,396,737]	318.9	0.8771	0.5803	1251	7	1	5220	5314	8921	2060	730754	7	6
Male	Control	TRUE	A	1	1	0	0	18	7	340	727	1820	1179	[331,718,351,740]	125.2	0.9665	0.8157	1943	8	1	4179	4254	6165	2510	459709	8	7
Male	Control	TRUE	A	1	1	0	0	18	8	842	773	2117	1153	[831,762,854,785]	161	0.9732	0.7979	2607	9	1	7965	8413	13583	2837	987648	9	8
Male	Control	TRUE	A	1	1	0	0	18	9	607	917	1978	1068	[595,903,620,930]	185.6	0.9465	0.6968	1998	11	1	5589	4853	11097	2762	788082	11	9
Male	Control	TRUE	A	1	1	0	0	18	10	920	991	2163	1024	[910,980,931,1002]	125.9	0.9697	0.801	1620	12	1	3181	3178	5541	1456	458116	12	10
Male	Control	TRUE	A	1	1	0	0	18	11	711	1007	2040	1014	[700,996,725,1019]	165.6	1.024	0.8091	1972	13	1	5329	4997	10629	2497	660740	13	11
Male	Control	TRUE	A	1	1	0	0	18	12	350	1051	1829	988	[340,1041,372,1061]	187.4	0.9666	0.6129	1063	14	1	3573	3560	6108	1667	393032	14	12
Male	Control	TRUE	A	1	1	0	0	19	1	343	453	2467	697	[332,442,355,464]	152.6	0.9753	0.7894	2483	4	1	7373	7091	12938	3824	774137	4	1
Male	Control	TRUE	A	1	1	0	0	19	2	27	495	2280	672	[15,484,38,507]	145.2	0.9304	0.6473	2430	6	1	3715	3652	7618	1683	910113	6	2
Male	Control	TRUE	A	1	1	0	0	19	3	574	686	2604	559	[562,674,587,701]	196.9	0.9801	0.8057	1725	7	1	4814	4642	8835	1870	794347	7	3
Male	Control	TRUE	A	1	1	0	0	19	4	419	737	2516	528	[406,728,444,748]	214.1	0.8687	0.4609	1227	8	1	4768	4440	9794	2166	462485	8	4
Male	Control	TRUE	A	1	1	0	0	19	5	451	975	2531	389	[440,959,462,986]	158.9	0.9821	0.7288	2173	10	1	4939	4868	8049	2263	800115	10	5
Male	Control	TRUE	A	1	1	0	0	20	1	810	72	2097	923	[798,62,822,83]	143.8	0.9752	0.813	2036	1	1	4565	4338	8379	2909	534117	1	1
Male	Control	TRUE	A	1	1	0	0	20	2	379	165	1840	867	[357,152,390,178]	226.1	0.8974	0.645	2780	2	1	8657	8325	16837	3631	1445730	2	2
Male	Control	TRUE	A	1	1	0	0	20	3	878	309	2138	783	[866,297,892,321]	183.2	0.9248	0.7288	2091	3	1	8470	8168	15422	3545	787717	3	3
Male	Control	TRUE	A	1	1	0	0	20	4	521	773	1927	508	[509,758,533,786]	194.4	0.9729	0.7388	2761	6	1	9039	9000	16935	3645	1193160	6	4
Male	Control	TRUE	A	1	1	0	0	20	5	773	949	2074	403	[753,939,785,960]	197.9	0.9131	0.6013	1689	7	1	7281	7554	11862	2578	749921	7	5
Male	Control	TRUE	A	1	1	0	0	20	6	860	1012	2127	366	[845,1002,872,1022]	141	0.9466	0.5964	2019	8	1	6516	5925	12535	3554	599434	8	6
Male	Control	TRUE	A	1	1	0	0	21	1	641	221	1353	834	[626,213,659,230]	171.2	0.8617	0.4582	2317	1	1	8551	8358	15655	3146	906431	1	1
Male	Control	TRUE	A	1	1	0	0	21	2	1062	491	1602	671	[1052,477,1072,516]	228.5	0.8575	0.4525	1407	2	1	4941	4471	11262	2140	652258	2	2
Male	Control	TRUE	A	1	1	0	0	21	3	670	735	1369	529	[655,721,685,754]	259.1	0.9856	0.6688	1439	4	1	4786	4657	8311	1913	780140	4	3
Male	Control	TRUE	A	1	1	0	0	21	4	940	855	1530	459	[930,845,952,866]	139.9	0.9951	0.8205	1474	5	1	2967	3075	4297	1748	415379	5	4
Male	Control	TRUE	A	1	1	0	0	22	1	137	232	408	826	[128,223,147,248]	147.7	0.9563	0.7244	2417	1	1	6263	6085	10655	2393	858001	1	1
Male	Control	TRUE	A	1	1	0	0	22	2	94	292	382	792	[83,282,104,304]	135.7	0.977	0.7547	1581	2	1	3526	3314	6367	1558	465392	2	2
Male	Control	TRUE	A	1	1	0	0	22	3	189	652	439	579	[179,642,203,662]	147.3	0.9719	0.7696	2921	3	1	8372	7348	15210	4978	786996	3	3
Male	Control	TRUE	A	1	1	0	0	23	1	330	320	-122	775	[316,306,351,338]	249.6	0.8602	0.4484	1934	2	1	7728	8313	13889	2901	1089660	2	1
Male	Control	TRUE	A	1	1	0	0	23	2	637	862	57	454	[615,844,656,882]	340	0.8822	0.4671	1800	6	1	7350	7250	13434	2731	1323050	6	2
Male	Control	TRUE	A	1	1	0	0	23	3	52	1016	-289	363	[42,1007,63,1026]	113.6	1.008	0.777	2210	7	1	5762	6198	9242	2407	553186	7	3
Male	Control	TRUE	A	1	1	0	0	23	4	102	1021	-259	359	[93,1012,112,1034]	124.5	0.9821	0.8099	1680	8	1	4627	4222	10505	1946	467358	8	4
Male	Control	TRUE	A	1	1	0	0	24	1	711	281	-544	799	[695,268,727,295]	229.6	0.9968	0.6194	1557	1	1	6514	6517	10744	2619	703489	1	1
Male	Control	TRUE	A	1	1	0	0	24	2	740	926	-527	415	[731,918,748,938]	103	0.9916	0.7822	3196	2	1	6897	6677	12923	3543	737983	2	2
Male	Control	TRUE	A	1	1	0	0	24	3	699	976	-551	387	[688,965,710,987]	141.7	1.002	0.7938	2171	3	1	5715	5220	11039	2589	662941	3	3
Male	Control	TRUE	A	1	1	0	0	25	1	90	202	-1558	845	[81,193,100,214]	126.6	0.9546	0.8372	2151	2	1	5544	5759	8282	2878	504459	2	1
Male	Control	TRUE	A	1	1	0	0	25	2	1044	715	-992	542	[1035,703,1056,724]	128	0.9431	0.6988	1862	4	1	4901	4778	10242	2049	534187	4	2
Male	Control	TRUE	A	1	1	0	0	25	3	324	761	-1420	514	[311,748,336,776]	183.9	0.9558	0.5926	1440	5	1	4946	4585	9893	2116	529168	5	3
Male	Control	TRUE	A	1	1	0	0	25	4	395	762	-1377	514	[383,751,408,773]	152.6	1.01	0.7188	2672	6	1	6908	7152	11443	2681	967077	6	4
Male	Control	TRUE	A	1	1	0	0	25	5	249	832	-1463	472	[239,822,261,843]	134.3	1.008	0.8266	2944	7	1	9429	9863	17196	3671	905139	7	5
Male	Control	TRUE	A	1	1	0	0	25	6	130	908	-1536	424	[118,894,139,931]	193.7	0.8177	0.4572	1471	8	1	5644	5639	9811	2163	615196	8	6
Male	Control	TRUE	A	1	1	0	0	25	7	961	1019	-1045	359	[940,1010,970,1035]	180.4	0.7619	0.454	861.1	9	1	2261	2215	3279	1340	259979	9	7
Male	Control	TRUE	A	1	1	0	0	26	1	49	53	-2228	934	[39,42,60,63]	137.5	0.9666	0.7547	1488	1	1	3339	3026	8516	1792	404075	1	1
Male	Control	TRUE	A	1	1	0	0	26	2	66	237	-2220	825	[49,228,77,248]	157.5	0.9444	0.612	2380	3	1	7816	8061	14017	3025	844094	2	2
Male	Control	TRUE	A	1	1	0	0	26	3	557	304	-1924	785	[546,293,577,317]	214.5	0.9576	0.6247	1705	4	1	5145	5086	8711	1991	812861	3	3
Male	Control	TRUE	A	1	1	0	0	26	4	136	307	-2173	783	[126,297,157,318]	193.7	0.9281	0.6153	1882	5	1	6395	6171	13150	2470	799390	4	4
Male	Control	TRUE	A	1	1	0	0	26	5	966	600	-1684	610	[957,591,978,609]	102.3	0.9875	0.7412	2792	6	1	5326	5483	8259	2977	676398	5	5
Male	Control	TRUE	A	1	1	0	0	26	6	977	611	-1678	602	[969,603,986,625]	108.6	0.9609	0.685	1648	7	1	3348	2985	6843	1562	395060	6	6
Male	Control	TRUE	A	1	1	0	0	26	7	236	644	-2117	585	[225,633,248,655]	150.1	1.001	0.8426	2950	8	1	8568	8581	17868	3184	1071040	7	7
Male	Control	TRUE	A	1	1	0	0	26	8	541	721	-1937	538	[526,710,554,734]	178.6	0.985	0.7023	2058	9	1	7263	6041	15710	3491	660955	8	8
Male	Control	TRUE	A	1	1	0	0	26	9	1022	852	-1651	461	[1009,834,1034,868]	229.2	0.955	0.6319	1403	10	1	3997	3849	8923	1588	715486	9	9
Male	Control	TRUE	A	1	1	0	0	27	1	815	189	-2420	853	[805,180,825,199]	117.1	0.985	0.8411	1623	1	1	3304	3138	5601	1438	439429	1	1
Male	Control	TRUE	A	1	1	0	0	27	2	605	495	-2543	671	[594,484,622,511]	182.5	0.9369	0.5892	1488	3	1	5193	4635	9265	2331	550423	3	2
Male	Control	TRUE	A	1	1	0	0	27	3	809	574	-2424	624	[799,564,819,587]	149.1	0.9788	0.831	1853	4	1	4132	3951	7256	1887	611588	4	3
Male	Control	TRUE	A	1	1	0	0	27	4	596	696	-2550	553	[586,686,606,706]	121.6	0.9879	0.8411	2910	6	1	6230	5785	11177	3387	753836	6	4
Male	Control	TRUE	A	1	1	0	0	28	1	600	246	-2549	174	[585,233,611,259]	187.7	0.9109	0.6591	2041	2	1	5702	5545	10941	2351	826793	2	1
Male	Control	TRUE	A	1	1	0	0	28	2	964	258	-2331	167	[952,245,977,270]	184.2	0.9719	0.8305	995.1	3	1	2378	2348	4511	971	406710	3	2
Male	Control	TRUE	A	1	1	0	0	28	3	224	426	-2770	66	[215,416,233,440]	129	0.9658	0.7133	1858	5	1	5735	5774	9840	2512	510452	5	3
Male	Control	TRUE	A	1	1	0	0	28	4	103	620	-2840	-49	[93,609,122,634]	171.2	0.9304	0.5006	2546	7	1	8137	8202	13680	3771	952047	7	4
Male	Control	TRUE	A	1	1	0	0	28	5	482	949	-2617	-244	[470,936,496,967]	207.8	0.9819	0.5657	1207	8	1	4149	3813	8080	1763	502063	8	5
Male	Control	TRUE	A	1	1	0	0	29	1	199	36	-2139	298	[186,22,214,52]	224	0.9966	0.7058	1953	1	1	7834	8166	13173	2822	979261	1	1
Male	Control	TRUE	A	1	1	0	0	29	2	175	107	-2153	256	[165,97,188,118]	144.1	1.013	0.813	2503	2	1	5997	5562	10413	2860	827520	2	2
Male	Control	TRUE	A	1	1	0	0	29	3	572	111	-1918	254	[562,100,582,121]	125.5	0.9321	0.7546	3092	3	1	7161	7216	12849	2663	938142	3	3
Male	Control	TRUE	A	1	1	0	0	29	4	274	180	-2095	212	[263,170,285,194]	150.8	0.9857	0.7126	2635	4	1	7814	8319	12605	2820	961166	4	4
Male	Control	TRUE	A	1	1	0	0	29	5	245	444	-2112	55	[236,435,255,458]	131.5	0.9768	0.7845	3071	6	1	6658	6839	11041	2362	1012070	6	5
Male	Control	TRUE	A	1	1	0	0	29	6	299	838	-2081	-178	[281,825,313,855]	231.3	0.922	0.693	1803	9	1	6296	6691	10660	2374	906661	9	6
Male	Control	TRUE	A	1	1	0	0	29	7	740	983	-1817	-263	[730,973,756,993]	151.5	0.9546	0.6631	1940	10	1	5870	5702	10884	2430	639780	10	7
Male	Control	TRUE	A	1	1	0	0	30	1	115	149	-1543	231	[103,138,128,163]	165.2	0.9882	0.5582	2116	1	1	7460	7584	13140	2709	805629	1	1
Male	Control	TRUE	A	1	1	0	0	30	2	364	269	-1396	160	[352,261,375,278]	105.8	0.9656	0.6064	2237	2	1	4859	4235	9113	2504	529591	2	2
Male	Control	TRUE	A	1	1	0	0	30	3	808	548	-1132	-5	[799,539,817,557]	101.6	0.9834	0.8741	3018	3	1	5372	5192	8751	2622	709072	3	3
Male	Control	TRUE	A	1	1	0	0	30	4	236	882	-1472	-203	[215,865,256,895]	266.8	0.7713	0.4778	1268	5	1	4103	4087	7151	1642	393916	4	4
Male	Control	TRUE	A	1	1	0	0	31	1	442	1037	-702	-296	[431,1025,458,1052]	196.9	0.9511	0.6143	1961	5	1	6833	6799	11504	2687	826807	5	1
Male	Control	TRUE	A	1	1	0	0	32	1	640	221	705	190	[627,203,652,233]	195.1	0.9185	0.5299	3346	3	1	9150	9766	17423	3321	1583020	3	1
Male	Control	TRUE	A	1	1	0	0	32	2	295	697	503	-95	[283,685,312,712]	217.3	0.8536	0.6525	2895	5	1	10407	10852	14993	6053	1103090	5	3
Male	Control	TRUE	A	1	1	0	0	32	3	862	732	838	-114	[849,713,880,748]	282.7	0.8345	0.5785	2268	6	1	9257	9576	16719	3362	1462660	6	4
Male	Control	TRUE	A	1	1	0	0	33	1	330	88	1167	267	[320,78,340,98]	114.3	1.033	0.8435	1772	1	1	3595	3442	6369	1542	470934	1	1
Male	Control	TRUE	A	1	1	0	0	33	2	662	812	1364	-164	[649,799,675,831]	237	0.9229	0.6744	1710	4	1	5628	5562	10221	2482	861024	4	2
Male	Control	TRUE	A	1	1	0	0	34	1	508	562	1919	-13	[496,550,521,574]	173	0.9986	0.8571	4544	1	1	14511	14345	25751	5530	1857419	1	1
Male	Control	TRUE	A	1	1	0	0	35	1	967	63	2834	283	[947,53,977,74]	170.9	0.9442	0.636	2137	1	1	7860	8318	12694	2882	825311	1	1
Male	Control	TRUE	A	1	1	0	0	35	2	861	316	2773	133	[846,304,873,328]	193.7	0.942	0.7793	2085	3	1	5779	5521	11278	2277	907257	3	2
Male	Control	TRUE	A	1	1	0	0	35	3	784	776	2728	-140	[773,763,797,789]	171.6	0.9618	0.691	1566	5	1	4881	4653	9437	1914	605252	4	3
Male	Control	TRUE	A	1	1	0	0	35	4	824	810	2753	-161	[814,800,838,821]	150.8	0.9857	0.8303	2640	6	1	6457	6642	11500	2428	955587	5	4
Male	Control	TRUE	A	1	1	0	0	36	1	668	234	2660	-464	[655,224,681,244]	152.9	0.9939	0.7488	3347	1	1	7349	7304	13816	2562	1293420	1	1
Male	Control	TRUE	A	1	1	0	0	36	2	255	638	2415	-705	[245,628,267,649]	143.1	0.9551	0.7547	1545	3	1	3706	3417	6867	1669	474372	3	2
Male	Control	TRUE	A	1	1	0	0	36	3	384	783	2491	-791	[374,773,394,795]	132.9	1.002	0.7436	2247	4	1	5659	5448	11176	2247	679070	4	3
Male	Control	TRUE	A	1	1	0	0	36	4	237	1008	2404	-925	[228,995,246,1028]	168.1	0.8649	0.4822	975.5	5	1	2914	2656	6121	1243	343796	5	4
Male	Control	TRUE	A	1	1	0	0	37	1	496	236	1914	-468	[483,223,519,256]	223.6	0.7856	0.3994	819.1	1	1	2208	2051	3879	1248	309051	1	1
Male	Control	TRUE	A	1	1	0	0	37	2	122	410	1690	-573	[112,397,132,436]	246.8	0.8757	0.5073	2111	2	1	6840	6946	11338	2702	1135390	2	2
Male	Control	TRUE	A	1	1	0	0	38	1	152	1019	1063	-930	[142,1007,168,1029]	167.3	0.9476	0.6491	1768	3	1	6300	6100	11793	2387	636334	3	2
Male	Control	TRUE	A	1	1	0	0	38	2	868	1054	1489	-951	[858,1044,888,1065]	199.7	0.9049	0.641	1895	4	1	6394	6383	12024	2507	837579	4	3
Male	Control	TRUE	A	1	1	0	0	39	1	420	307	576	-509	[411,295,432,320]	131.5	0.9411	0.548	3113	1	1	6647	6612	12869	2481	1036990	1	1
Male	Control	TRUE	A	1	1	0	0	39	2	277	483	491	-613	[265,471,293,495]	167	0.9313	0.5783	1033	3	1	2419	2296	4586	1116	372533	3	2
Male	Control	TRUE	A	1	1	0	0	40	1	945	497	243	-621	[934,486,965,509]	183.9	0.9131	0.5526	1642	1	1	5769	5713	9562	2161	657627	1	1
Male	Control	TRUE	A	1	1	0	0	41	1	873	280	-447	-492	[861,269,890,292]	180.4	0.9907	0.6997	1246	2	1	3834	3461	8820	1698	414064	2	1
Male	Control	TRUE	A	1	1	0	0	41	2	310	646	-780	-709	[300,635,325,657]	160.3	0.9706	0.7284	2792	6	1	9353	9364	17402	4413	991422	6	2
Male	Control	TRUE	A	1	1	0	0	42	1	864	179	-1098	-433	[854,169,879,192]	149.1	0.9964	0.6595	1348	1	1	3460	3219	6392	1496	432443	1	1
Male	Control	TRUE	A	1	1	0	0	42	2	634	190	-1235	-437	[624,170,646,204]	193	0.8866	0.4981	1040	2	1	2516	2471	4485	1047	442793	2	2
Male	Control	TRUE	A	1	1	0	0	42	3	943	239	-1053	-468	[933,225,953,253]	155	0.9356	0.6403	2136	3	1	5528	5613	9736	2120	796007	3	3
Male	Control	TRUE	A	1	1	0	0	42	4	138	285	-1529	-496	[126,273,153,298]	172.6	0.9499	0.5906	2701	4	1	9397	9786	16013	3416	1108900	4	4
Male	Control	TRUE	A	1	1	0	0	42	5	726	302	-1181	-506	[708,290,741,319]	235.9	0.9084	0.526	1446	5	1	4413	4443	8156	1728	767809	5	5
Male	Control	TRUE	A	1	1	0	0	43	1	55	124	-2222	-399	[43,114,73,135]	189.1	0.972	0.6641	2063	2	1	7381	7659	13160	2729	900541	2	1
Male	Control	TRUE	A	1	1	0	0	43	2	1025	411	-1648	-569	[1014,401,1042,421]	172.3	0.9488	0.6879	1862	4	1	4725	4659	8888	1639	779617	4	2
Male	Control	TRUE	A	1	1	0	0	43	3	518	742	-1952	-767	[500,732,528,755]	171.2	0.9606	0.5828	2006	5	1	6619	6091	11879	2896	582503	5	3
Male	Control	TRUE	A	1	1	0	0	43	4	715	803	-1832	-803	[705,793,728,815]	132.2	0.9441	0.5922	3068	6	1	7342	6903	13788	3724	895772	6	4
Male	Control	TRUE	A	1	1	0	0	44	1	121	128	-2831	-403	[109,116,132,141]	166.6	0.9932	0.7565	2132	1	1	8287	7794	15994	3334	770694	1	1
Male	Control	TRUE	A	1	1	0	0	44	2	558	190	-2572	-439	[549,181,569,200]	124.1	0.9804	0.8157	3719	3	1	9408	8794	18267	3674	1081910	3	2
Male	Control	TRUE	A	1	1	0	0	44	3	567	229	-2567	-462	[555,217,580,243]	177.2	1.047	0.8305	2414	4	1	7230	7180	13162	2882	918178	4	3
Male	Control	TRUE	A	1	1	0	0	44	4	672	324	-2504	-519	[662,314,683,336]	137.1	0.9831	0.8053	1512	5	1	3329	3308	5785	1472	452742	5	4
Male	Control	TRUE	A	1	1	0	0	44	5	781	473	-2440	-605	[771,455,791,484]	154.7	0.9343	0.6412	2860	6	1	7151	6928	13024	2528	1115600	6	5
Male	Control	TRUE	A	1	1	0	0	44	6	244	713	-2757	-749	[235,704,259,723]	135.4	0.9577	0.7018	3450	7	1	10601	9527	22418	4626	1060140	7	6
Male	Control	TRUE	A	1	1	0	0	44	7	458	1058	-2632	-955	[448,1048,467,1076]	133.6	0.8694	0.4794	1581	9	1	4908	4731	8476	2461	446610	9	7
Male	Control	TRUE	A	1	1	0	0	45	1	487	48	-1968	-1001	[471,32,507,64]	292.2	0.9113	0.692	1560	1	1	8503	7772	18537	3429	918280	1	1
Male	Control	TRUE	A	1	1	0	0	45	2	310	363	-2074	-1189	[299,353,322,377]	149.8	0.9645	0.6966	2061	3	1	7071	6768	13472	2808	671790	3	2
Male	Control	TRUE	A	1	1	0	0	45	3	244	509	-2111	-1274	[230,497,263,521]	228.9	0.9412	0.6444	3768	4	1	11673	11644	23230	4112	2101130	4	3
Male	Control	TRUE	A	1	1	0	0	45	4	514	564	-1951	-1309	[505,552,531,582]	173.3	0.9227	0.4714	1105	5	1	3178	3030	6750	1463	359076	5	4
Male	Control	TRUE	A	1	1	0	0	45	5	30	593	-2238	-1323	[20,583,44,603]	148.4	0.9761	0.7159	2476	6	1	8440	7333	15704	4063	742690	6	5
Male	Control	TRUE	A	1	1	0	0	45	6	93	609	-2202	-1333	[82,597,105,623]	168.1	0.9817	0.6425	2694	7	1	8767	9125	14875	3307	1017000	7	6
Male	Control	TRUE	A	1	1	0	0	46	1	287	328	-1444	-1168	[267,319,297,341]	178.2	0.833	0.5847	1727	1	1	5999	5520	12324	3000	629846	1	1
Male	Control	TRUE	A	1	1	0	0	46	2	618	401	-1246	-1210	[598,387,636,417]	284.4	0.9407	0.6026	1347	2	1	4209	4051	7327	1804	837531	2	2
Male	Control	TRUE	A	1	1	0	0	46	3	609	571	-1251	-1311	[598,559,621,582]	149.4	0.9978	0.7892	1009	3	1	2513	2249	4750	1218	293966	3	3
Male	Control	TRUE	A	1	1	0	0	47	1	865	493	-451	-1265	[851,471,883,519]	349.1	0.8342	0.442	1069	1	1	5244	5073	9661	2108	666044	1	1
Male	Control	TRUE	A	1	1	0	0	47	2	334	508	-768	-1272	[324,496,344,518]	133.9	0.9178	0.7488	2774	2	1	6491	6392	10011	3770	772380	2	2
Male	Control	TRUE	A	1	1	0	0	47	3	567	964	-629	-1545	[557,954,579,978]	149.1	0.9788	0.7571	2595	3	1	7015	6685	12044	3419	771687	3	3
Male	Control	TRUE	A	1	1	0	0	47	4	523	1000	-656	-1566	[514,991,533,1014]	130.4	0.9721	0.771	2660	5	1	6475	6272	11345	2501	841706	5	4
Male	Control	TRUE	A	1	1	0	0	47	5	949	1037	-403	-1587	[938,1026,961,1050]	157.9	0.9782	0.8517	2091	6	1	5323	5086	8864	2957	676055	6	5
Male	Control	TRUE	A	1	1	0	0	48	1	875	181	199	-1080	[866,172,884,193]	115.7	0.9778	0.811	1206	1	1	2939	2815	4650	1625	279162	1	1
Male	Control	TRUE	A	1	1	0	0	48	2	978	774	261	-1431	[956,759,1003,789]	345.9	0.8913	0.4616	2027	3	1	7922	8306	15416	2784	1592300	3	2
Male	Control	TRUE	A	1	1	0	0	49	1	432	340	583	-1174	[420,329,445,352]	165.6	0.9895	0.8269	1789	2	1	4793	4399	9596	2512	565605	2	1
Male	Control	TRUE	A	1	1	0	0	49	2	905	779	864	-1434	[895,768,922,789]	156.1	0.9394	0.6192	1832	7	1	4491	4383	8612	1992	619714	7	2
Male	Control	TRUE	A	1	1	0	0	51	1	444	235	1880	-1113	[431,222,455,250]	188.1	0.954	0.7388	1678	1	1	6551	5812	12535	2617	648537	1	1
Male	Control	TRUE	A	1	1	0	0	51	2	255	357	1769	-1183	[241,344,268,370]	198.6	0.9853	0.7211	2594	2	1	7489	7481	13902	2879	1168210	2	2
Male	Control	TRUE	A	1	1	0	0	51	3	685	632	2025	-1346	[675,625,699,640]	109.7	0.9096	0.5769	3200	3	1	7496	7081	13261	3301	817042	3	3
Male	Control	TRUE	A	1	1	0	0	51	4	721	753	2040	-1420	[690,743,732,767]	270.7	0.851	0.463	1415	4	1	5618	5431	10258	2192	786478	4	4
Male	Control	TRUE	A	1	1	0	0	51	5	816	944	2104	-1533	[804,935,838,960]	193.4	0.8876	0.477	1394	5	1	4928	4899	9756	1894	591328	5	5
Male	Control	TRUE	A	1	1	0	0	52	1	930	77	2169	-1663	[920,65,941,87]	123.1	0.9566	0.7144	2753	1	1	6642	7130	11533	2336	850124	1	1
Male	Control	TRUE	A	1	1	0	0	52	2	33	245	1637	-1762	[22,221,44,266]	264.4	0.8199	0.4116	806.1	2	1	3140	2892	5713	1701	354779	2	2
Male	Control	TRUE	A	1	1	0	0	52	3	164	538	1715	-1937	[153,527,175,550]	147	1.006	0.833	2390	3	1	5309	5185	8997	3189	499085	3	3
Male	Control	TRUE	A	1	1	0	0	53	1	349	322	1179	-1808	[338,310,361,333]	159.3	0.9834	0.8172	2373	1	1	7713	7849	13298	3984	794433	1	1
Male	Control	TRUE	A	1	1	0	0	54	1	501	118	623	-1688	[490,107,514,129]	155	1.02	0.8254	2452	1	1	7102	7141	15152	2625	894853	1	1
Male	Control	TRUE	A	1	1	0	0	54	2	174	372	430	-1840	[165,363,185,386]	134.3	0.9532	0.6632	1544	2	1	4344	3986	7730	1871	430051	2	2
Male	Control	TRUE	A	1	1	0	0	54	3	33	634	347	-1999	[23,623,47,664]	250	0.8715	0.4547	1449	3	1	6100	5952	10751	2316	811362	3	3
Male	Control	TRUE	A	1	1	0	0	54	4	781	706	789	-2037	[769,694,793,719]	174.4	1.003	0.8697	2431	5	1	6860	6418	14428	3600	864310	5	4
Male	Control	TRUE	A	1	1	0	0	54	5	228	854	462	-2124	[214,843,246,865]	178.2	0.8962	0.5153	2305	6	1	8983	9236	17576	3168	970165	6	5
Male	Control	TRUE	A	1	1	0	0	54	6	640	860	705	-2128	[621,844,653,878]	254.9	0.951	0.5361	1320	7	1	5451	5661	10486	2565	703217	7	6
Male	Control	TRUE	A	1	1	0	0	54	7	511	990	628	-2207	[496,979,523,1009]	215.9	0.909	0.5262	1871	8	1	5797	5900	10415	2066	933346	8	7
Male	Control	TRUE	A	1	1	0	0	55	1	328	105	-125	-1680	[314,90,340,118]	185.6	0.9763	0.676	2217	1	1	4986	4282	11046	2045	972267	1	1
Male	Control	TRUE	A	1	1	0	0	55	2	468	894	-42	-2148	[458,884,478,905]	130.1	0.9705	0.8687	2551	3	1	5541	5229	10119	2273	781286	2	2
Male	Control	TRUE	A	1	1	0	0	56	1	594	704	-612	-2036	[574,693,621,716]	301.6	0.8305	0.4616	2882	1	1	9836	10564	16722	3575	1977110	1	1
Male	Control	TRUE	A	1	1	0	0	56	2	1000	874	-373	-2136	[991,865,1009,885]	107.2	1.016	0.8675	2492	2	1	4974	4793	9092	2041	646608	2	2
Male	Control	TRUE	A	1	1	0	0	56	3	883	1021	-441	-2222	[870,1011,898,1031]	154.7	0.9039	0.6174	2167	3	1	6517	6290	14835	2774	775526	3	3
Male	Control	TRUE	A	1	1	0	0	57	1	927	581	-1062	-1964	[917,571,937,596]	154.3	0.982	0.7626	2285	2	1	6811	6232	16355	2929	742356	2	1
Male	Control	TRUE	A	1	1	0	0	57	2	58	661	-1576	-2010	[48,651,72,672]	145.2	0.9988	0.7384	1950	3	1	6072	6023	10504	2496	619324	3	2
Male	Control	TRUE	A	1	1	0	0	58	1	47	87	-2228	-1670	[33,75,65,102]	235.2	0.9068	0.6407	1572	1	1	6275	6517	11192	2426	796923	1	1
Male	Control	TRUE	A	1	1	0	0	58	2	174	520	-2155	-1927	[155,505,190,541]	290.4	0.9297	0.4739	2857	2	1	9437	9988	16048	3200	2000630	2	2
Male	Control	TRUE	A	1	1	0	0	59	1	458	289	-691	-2435	[450,281,475,299]	147	0.8348	0.6108	1085	1	1	4097	3941	8227	1736	684200	1	1
Male	Control	TRUE	A	1	1	0	0	59	2	487	291	-678	-2436	[474,280,498,301]	150.1	0.8594	0.6294	1294	2	1	4097	3941	8227	1736	684200	2	2
Male	Control	TRUE	A	1	1	0	0	59	3	366	296	-749	-2441	[355,285,377,315]	180	0.9152	0.5883	3282	3	1	11468	11628	18679	4273	1364710	3	3
Male	Control	TRUE	A	1	1	0	0	60	1	383	46	-93	-2292	[371,32,394,63]	184.9	0.9027	0.6109	1965	1	1	7154	7302	11672	3540	722523	1	1
Male	Control	TRUE	A	1	1	0	0	60	2	802	670	154	-2660	[779,653,821,685]	356.1	0.888	0.584	2249	3	1	6709	6464	12580	3067	1683950	3	2
Male	Control	TRUE	A	1	1	0	0	61	1	158	77	421	-2309	[146,66,173,89]	192.3	0.8975	0.6956	2070	1	1	5965	5519	11512	2771	876851	1	1
Male	Control	TRUE	A	1	1	0	0	61	2	375	482	549	-2550	[367,474,388,492]	117.8	0.9689	0.7383	3550	2	1	6894	6869	14626	2997	1034070	2	2
Male	Control	TRUE	A	1	1	0	0	61	3	123	693	400	-2675	[114,684,137,702]	127.3	0.9762	0.7392	2779	3	1	6710	7129	11438	2640	845465	3	3
Male	Control	TRUE	A	1	1	0	0	61	4	549	821	652	-2750	[538,810,561,834]	155	1.002	0.8035	2451	4	1	7822	7153	15231	3535	735239	4	4
Male	Control	TRUE	A	1	1	0	0	61	5	300	982	504	-2846	[285,969,317,995]	225	0.9851	0.7468	1153	5	1	3486	3527	6316	1459	519406	5	5
Male	Control	TRUE	A	1	1	0	0	61	6	511	394	628	-2498	[494,381,524,409]	241.9	0.9993	0.8149	1480	6	1	6903	5676	14064	3128	628178	6	6
Male	Control	TRUE	A	2	1	0	0	2	1	633	23	-591	2887	[621,13,643,41]	194.1	0.943	0.6707	1428	2	1	3473	3019	6901	2003	486160	1	1
Male	Control	TRUE	A	2	1	0	0	2	2	149	64	-877	2865	[137,52,164,76]	186.7	0.9645	0.7822	2412	3	1	6787	6882	12337	2585	1079080	2	2
Male	Control	TRUE	A	2	1	0	0	2	3	682	160	-563	2807	[664,149,695,174]	191.6	0.9358	0.5801	2356	4	1	8533	8209	17516	3288	1006850	3	3
Male	Control	TRUE	A	2	1	0	0	2	4	593	195	-614	2787	[581,183,603,208]	159.6	0.9211	0.646	1561	5	1	3289	2854	7302	1833	371665	4	4
Male	Control	TRUE	A	2	1	0	0	2	5	615	792	-601	2433	[603,781,627,804]	162.8	0.9632	0.832	3173	8	1	8805	8757	15985	3354	1232650	6	5
Male	Control	TRUE	A	2	1	0	0	2	6	318	978	-777	2323	[308,968,331,988]	139.2	0.9921	0.7982	2291	9	1	6856	5939	13398	3140	685615	7	6
Male	Control	TRUE	A	2	1	0	0	3	1	939	250	240	2753	[932,242,957,263]	128	0.8616	0.4522	2028	2	1	4426	4418	7409	2431	593051	1	1
Male	Control	TRUE	A	2	1	0	0	3	2	986	610	265	2541	[976,600,996,623]	133.2	1.003	0.776	2762	3	1	6760	7356	12539	2302	912591	2	2
Male	Control	TRUE	A	2	1	0	0	3	3	74	652	-276	2515	[63,640,85,669]	183.9	0.9412	0.678	1256	4	1	4067	3710	7197	1908	398604	3	3
Male	Control	TRUE	A	2	1	0	0	3	4	660	92	71	2848	[640,77,678,110]	301.6	0.9179	0.5324	1644	5	1	7706	7919	13960	2670	1101920	4	4
Male	Control	TRUE	A	2	1	0	0	4	1	1032	174	938	2800	[1019,164,1043,185]	141	0.9813	0.7402	2481	5	1	6692	6651	9881	4184	702703	3	1
Male	Control	TRUE	A	2	1	0	0	4	2	894	223	857	2770	[885,214,909,233]	139.2	0.9565	0.7388	3091	6	1	7773	7413	14216	3007	1018250	4	2
Male	Control	TRUE	A	2	1	0	0	4	3	829	726	817	2470	[817,710,839,748]	227.5	0.8662	0.5072	1443	9	1	4108	4039	8213	1634	735333	7	3
Male	Control	TRUE	A	2	1	0	0	4	4	16	1052	335	2282	[5,1030,27,1065]	220.8	0.9341	0.5799	1704	10	1	5122	5429	8399	1947	860543	8	4
Male	Control	TRUE	A	2	1	0	0	6	1	683	243	1379	2113	[669,231,703,255]	232.4	0.9762	0.6951	2039	3	1	6937	6347	12276	3137	971154	2	1
Male	Control	TRUE	A	2	1	0	0	6	2	417	299	1217	2076	[401,288,425,324]	185.6	0.8301	0.4049	4113	4	1	10432	10129	20880	3598	1940270	3	2
Male	Control	TRUE	A	2	1	0	0	6	3	676	706	1372	1837	[662,693,688,726]	222.9	0.9018	0.5806	3620	8	1	6981	7491	11170	2713	2038440	5	3
Male	Control	TRUE	A	2	1	0	0	6	4	971	889	1547	1729	[958,876,984,908]	244.7	0.9659	0.7142	1262	11	1	5599	5232	9679	2427	548707	8	4
Male	Control	TRUE	A	2	1	0	0	6	5	886	938	1497	1701	[876,927,896,949]	133.6	0.9861	0.8498	2353	12	1	6255	5442	12859	3647	644286	9	5
Male	Control	TRUE	A	2	1	0	0	7	1	1003	261	921	2102	[993,251,1014,272]	137.1	0.9651	0.7838	2625	1	1	7717	8014	12740	2676	872032	1	1
Male	Control	TRUE	A	2	1	0	0	7	2	635	407	702	2015	[624,396,649,423]	189.5	0.9026	0.6435	2229	2	1	8155	8801	15089	2871	954151	2	2
Male	Control	TRUE	A	2	1	0	0	7	3	717	695	754	1842	[701,684,740,719]	239.4	0.7462	0.4411	1690	5	1	5419	5675	9010	2415	634009	5	4
Male	Control	TRUE	A	2	1	0	0	7	4	479	950	610	1695	[468,933,490,963]	181.4	0.9631	0.6706	2022	6	1	4650	4386	9140	2055	823059	6	5
Male	Control	TRUE	A	2	1	0	0	7	5	816	996	808	1666	[795,982,829,1011]	229.9	0.8499	0.4859	885.1	7	1	3374	3649	5406	1275	438671	7	6
Male	Control	TRUE	A	2	1	0	0	8	1	243	222	-176	2125	[231,205,255,237]	211.3	0.9228	0.6702	1387	1	1	5648	4742	13268	2648	525283	1	1
Male	Control	TRUE	A	2	1	0	0	8	2	70	284	-274	2087	[55,266,103,306]	331.2	0.8084	0.331	1016	2	1	4173	4271	6665	1748	600927	2	2
Male	Control	TRUE	A	2	1	0	0	8	3	562	752	14	1811	[546,735,578,767]	237	0.9352	0.6228	1406	5	1	6158	5801	11413	2466	671274	5	3
Male	Control	TRUE	A	2	1	0	0	8	4	877	922	201	1711	[865,910,894,934]	196.2	0.949	0.7163	3173	6	1	8508	9089	17012	2799	1573950	6	4
Male	Control	TRUE	A	2	1	0	0	8	5	433	135	-65	2175	[413,120,448,159]	338.2	0.928	0.5377	1820	8	1	7096	6828	12781	2777	1256020	7	5
Male	Control	TRUE	A	2	1	0	0	8	6	458	231	-47	2119	[443,216,475,249]	278.4	0.9641	0.7352	3265	9	1	9293	10050	19274	3195	2211660	8	6
Male	Control	TRUE	A	2	1	0	0	9	1	157	315	-871	2070	[147,305,173,326]	167	0.978	0.712	2525	1	1	7536	7406	13888	3809	874132	1	1
Male	Control	TRUE	A	2	1	0	0	10	1	428	69	-1358	2213	[418,58,437,90]	173.3	0.8681	0.4851	2306	1	1	7099	7043	13055	2581	937113	1	1
Male	Control	TRUE	A	2	1	0	0	10	2	986	264	-1027	2100	[973,252,998,277]	165.6	0.9731	0.7845	2014	2	1	5356	4635	10034	2628	728421	2	2
Male	Control	TRUE	A	2	1	0	0	10	3	86	609	-1560	1894	[73,597,99,630]	239.1	0.9527	0.7016	1908	3	1	6034	5966	11893	3195	820672	3	3
Male	Control	TRUE	A	2	1	0	0	10	4	444	896	-1349	1725	[426,883,459,913]	228.2	0.8906	0.4717	993.7	4	1	3114	2952	6099	1446	417331	4	4
Male	Control	TRUE	A	2	1	0	0	10	5	302	1005	-1433	1660	[286,993,315,1021]	211.3	0.9916	0.6006	834.5	5	1	1877	1873	3592	960	292775	5	5
Male	Control	TRUE	A	2	1	0	0	10	6	721	933	-1184	1704	[707,918,736,947]	244	0.9907	0.833	1407	6	1	4613	4269	9942	2355	664295	6	6
Male	Control	TRUE	A	2	1	0	0	11	1	343	173	-2054	2155	[332,162,358,186]	184.2	0.9569	0.7577	2614	1	1	8615	8143	17117	3335	1033770	1	1
Male	Control	TRUE	A	2	1	0	0	11	2	126	302	-2182	2078	[113,286,141,315]	201.5	0.8048	0.4975	2566	2	1	6337	6380	12665	2973	1172330	2	2
Male	Control	TRUE	A	2	1	0	0	11	3	575	591	-1917	1906	[566,574,585,612]	211.6	0.8513	0.4759	729.7	3	1	1997	1858	3927	928	293512	3	3
Male	Control	TRUE	A	2	1	0	0	11	4	385	589	-2029	1908	[374,578,398,600]	156.8	0.9913	0.7803	2791	4	1	10123	10836	16315	4481	961671	4	4
Male	Control	TRUE	A	2	1	0	0	11	5	409	656	-2017	1866	[381,646,432,676]	272.1	0.7479	0.3308	673	6	1	2236	2166	3947	1001	328727	6	5
Male	Control	TRUE	A	2	1	0	0	14	1	40	64	-941	1574	[29,53,54,75]	175.4	0.9591	0.8471	2342	1	1	6990	7020	14066	2704	950572	1	1
Male	Control	TRUE	A	2	1	0	0	14	2	335	621	-767	1243	[322,612,347,631]	142	0.968	0.686	2148	2	1	6259	6161	10674	3130	619654	2	2
Male	Control	TRUE	A	2	1	0	0	14	3	668	793	-571	1143	[650,763,683,816]	308.7	0.7595	0.3243	1553	3	1	6219	6691	10587	2256	1038600	3	3
Male	Control	TRUE	A	2	1	0	0	15	1	976	57	259	1579	[967,44,987,68]	111.1	0.8817	0.4571	2815	1	1	6782	5771	13603	3395	739288	1	1
Male	Control	TRUE	A	2	1	0	0	15	2	982	70	263	1570	[973,57,990,83]	106.5	0.8591	0.51	1002	2	1	6782	5771	13603	3395	739288	2	2
Male	Control	TRUE	A	2	1	0	0	17	1	1008	64	1569	1574	[990,50,1024,75]	214.1	0.9046	0.5368	1923	1	1	7420	7363	13813	3179	749373	1	1
Male	Control	TRUE	A	2	1	0	0	17	2	534	178	1288	1505	[522,168,545,188]	136.8	0.9636	0.7627	3356	2	1	5813	5942	9715	2248	1180090	2	2
Male	Control	TRUE	A	2	1	0	0	17	3	1027	359	1582	1399	[1016,348,1043,371]	189.1	0.972	0.7188	2061	4	1	5922	5879	10873	2448	864578	4	3
Male	Control	TRUE	A	2	1	0	0	17	4	235	858	1111	1102	[221,845,248,872]	202.5	0.9965	0.8617	2384	5	1	7703	7698	13675	3023	1093770	5	4
Male	Control	TRUE	A	2	1	0	0	17	5	707	961	1391	1042	[689,952,724,969]	142.4	0.7246	0.3518	2061	6	1	4396	4117	6945	3068	378057	6	5
Male	Control	TRUE	A	2	1	0	0	18	1	614	158	1982	1517	[603,148,625,173]	141	0.8984	0.6795	2347	1	1	6346	6531	9781	2555	729800	1	1
Male	Control	TRUE	A	2	1	0	0	18	2	83	172	1667	1510	[71,160,97,182]	137.8	0.8861	0.5722	2028	2	1	5233	4872	10677	2068	654173	2	2
Male	Control	TRUE	A	2	1	0	0	18	3	629	448	1992	1346	[620,440,643,456]	106.9	0.9715	0.6785	3679	3	1	9146	8981	17631	3657	932850	3	3
Male	Control	TRUE	A	2	1	0	0	18	4	668	523	2014	1302	[657,507,683,534]	161	0.8301	0.4751	4966	4	1	8820	8568	16346	3218	1834550	4	4
Male	Control	TRUE	A	2	1	0	0	18	5	431	938	1874	1055	[422,928,442,948]	129.4	0.9319	0.7682	2278	5	1	4494	4437	7437	2370	710099	5	5
Male	Control	TRUE	A	2	1	0	0	18	6	419	1026	1866	1003	[408,1015,430,1038]	157.5	0.9604	0.7789	1822	7	1	4546	4269	7900	2275	618202	7	6
Male	Control	TRUE	A	2	1	0	0	19	1	485	167	2551	866	[474,157,495,181]	149.4	0.9631	0.7086	2248	1	1	5139	4852	9805	2037	806862	1	1
Male	Control	TRUE	A	2	1	0	0	19	2	715	297	2688	789	[705,288,728,307]	125.5	0.9681	0.6813	3477	2	1	9383	9496	16780	4541	1022730	2	2
Male	Control	TRUE	A	2	1	0	0	19	3	811	387	2744	737	[797,373,826,401]	234.5	0.9814	0.8265	1620	3	1	8029	7628	14312	3432	706564	3	3
Male	Control	TRUE	A	2	1	0	0	19	4	689	422	2672	715	[678,411,700,436]	173.3	0.8947	0.7456	2066	4	1	5975	5644	12513	2691	716991	4	4
Male	Control	TRUE	A	2	1	0	0	19	5	364	690	2480	557	[351,676,377,701]	169.1	0.9692	0.7022	1399	6	1	3824	3478	7552	1870	447415	6	5
Male	Control	TRUE	A	2	1	0	0	20	1	606	112	1977	899	[597,103,617,122]	110.7	1.014	0.8435	4154	2	1	8571	8439	13816	4281	1105720	1	1
Male	Control	TRUE	A	2	1	0	0	20	2	222	22	1749	953	[210,3,235,39]	236.6	0.8756	0.501	1196	3	1	4748	4356	9444	1982	555528	2	2
Male	Control	TRUE	A	2	1	0	0	21	1	68	219	1012	837	[58,196,79,237]	238.7	0.7982	0.4136	823.1	1	1	3068	2655	6356	1441	349729	1	1
Male	Control	TRUE	A	2	1	0	0	21	2	900	518	1505	658	[889,508,911,528]	131.5	0.9955	0.809	2037	2	1	4731	4720	7856	2884	529867	2	2
Male	Control	TRUE	A	2	1	0	0	21	3	586	777	1320	504	[574,765,598,794]	203.2	0.9691	0.7201	1620	3	1	5339	5437	10202	2067	720778	3	3
Male	Control	TRUE	A	2	1	0	0	21	4	459	913	1245	423	[447,899,474,933]	225.4	0.9722	0.5374	2717	4	1	7546	7546	12777	3020	1441270	4	4
Male	Control	TRUE	A	2	1	0	0	22	1	418	342	573	763	[401,330,429,354]	176.5	0.9781	0.6415	2096	1	1	7643	6582	18620	3555	703195	1	1
Male	Control	TRUE	A	2	1	0	0	22	2	55	767	357	508	[41,757,61,783]	106.5	0.8269	0.4483	1616	4	1	5109	5098	10787	1970	751030	4	2
Male	Control	TRUE	A	2	1	0	0	23	1	1062	438	310	706	[1053,424,1072,455]	165.2	0.8692	0.5252	1233	1	1	2979	3061	5657	1198	458805	1	1
Male	Control	TRUE	A	2	1	0	0	23	2	385	976	-91	386	[375,965,400,991]	154	0.8869	0.5207	1868	4	1	5009	4916	9280	1906	681279	4	2
Male	Control	TRUE	A	2	1	0	0	23	3	96	585	-262	618	[82,573,112,598]	208.1	0.9828	0.7433	1429	5	1	3498	3428	6193	1503	654169	5	3
Male	Control	TRUE	A	2	1	0	0	25	1	116	255	-1542	814	[106,245,126,266]	125.5	0.987	0.8132	2088	1	1	3971	3940	6218	1875	623447	1	1
Male	Control	TRUE	A	2	1	0	0	25	2	398	468	-1375	688	[389,459,408,477]	101.6	0.9623	0.7761	4129	3	1	8592	9317	14673	2911	1074050	3	2
Male	Control	TRUE	A	2	1	0	0	26	1	784	40	-1793	944	[772,24,794,51]	143.1	0.9551	0.5	1529	2	1	3939	3548	8696	1739	484534	1	1
Male	Control	TRUE	A	2	1	0	0	27	1	229	245	-2767	819	[218,235,241,261]	163.5	0.9657	0.6675	2296	1	1	8080	7367	14037	3811	694861	1	1
Male	Control	TRUE	A	2	1	0	0	27	2	622	397	-2534	730	[610,385,635,410]	173	1.033	0.8449	2095	2	1	6472	6326	11946	3295	711871	2	2
Male	Control	TRUE	A	2	1	0	0	27	3	543	975	-2582	387	[529,961,557,991]	242.9	0.9748	0.7889	1385	3	1	5710	5189	13395	2405	645266	3	3
Male	Control	TRUE	A	2	1	0	0	27	4	49	1008	-2872	367	[38,997,65,1022]	182.8	0.9829	0.6923	2260	4	1	8142	7734	15759	3071	920015	4	4
Male	Control	TRUE	A	2	1	0	0	29	1	213	676	-2131	-81	[201,660,224,692]	185.6	0.866	0.4609	1526	1	1	4238	3860	9213	1669	635637	1	1
Male	Control	TRUE	A	2	1	0	0	29	2	930	100	-1706	260	[917,86,944,116]	235.9	0.9327	0.767	1271	3	1	5669	4923	11420	2552	544197	3	2
Male	Control	TRUE	A	2	1	0	0	32	1	691	135	737	239	[676,120,707,153]	258.8	0.9594	0.6158	2091	1	1	6211	6208	10728	2333	1229800	1	1
Male	Control	TRUE	A	2	1	0	0	32	2	271	370	489	100	[256,358,295,383]	251.7	0.9564	0.5405	1611	2	1	8284	8343	13174	3302	729000	2	2
Male	Control	TRUE	A	2	1	0	0	32	3	508	512	629	16	[499,503,522,522]	128.7	1.002	0.7573	3325	5	1	9076	7880	18844	5094	798726	5	4
Male	Control	TRUE	A	2	1	0	0	32	4	252	919	475	-226	[241,909,262,932]	141.3	0.9828	0.8369	2183	6	1	5100	4937	8428	3112	637491	6	5
Male	Control	TRUE	A	2	1	0	0	32	5	775	1047	786	-302	[762,1034,787,1068]	230.6	0.8963	0.5757	1868	8	1	7621	7244	14442	3104	853524	8	6
Male	Control	TRUE	A	2	1	0	0	33	1	721	884	1400	-204	[711,867,732,896]	157.2	0.8979	0.6481	2868	3	1	7300	6843	12065	4422	817571	3	1
Male	Control	TRUE	A	2	1	0	0	34	1	165	560	1714	-12	[150,551,177,569]	138.2	0.9352	0.6071	2492	1	1	7506	7416	13843	3068	773076	1	1
Male	Control	TRUE	A	2	1	0	0	35	1	536	68	2581	279	[524,57,547,80]	156.8	0.9913	0.855	2859	1	1	7223	7341	13429	2634	1090730	1	1
Male	Control	TRUE	A	2	1	0	0	35	2	885	373	2790	99	[874,362,902,385]	185.6	0.9465	0.6629	2216	3	1	9614	9466	16321	3903	836428	2	2
Male	Control	TRUE	A	2	1	0	0	35	3	1026	375	2872	98	[1012,365,1042,386]	179.7	0.9282	0.6567	2162	4	1	5536	5318	11016	2063	941157	3	3
Male	Control	TRUE	A	2	1	0	0	35	4	895	588	2793	-29	[882,577,904,599]	129	0.9478	0.606	2335	7	1	4911	4737	9700	2069	726770	6	4
Male	Control	TRUE	A	2	1	0	0	36	1	1026	219	2872	-459	[1015,199,1037,253]	302.7	0.7431	0.3712	969.3	1	1	4410	3804	10468	2075	546897	1	1
Male	Control	TRUE	A	2	1	0	0	37	1	915	553	2160	-656	[904,539,926,578]	254.9	0.871	0.5444	1539	2	1	5554	5183	10960	2504	755327	2	1
Male	Control	TRUE	A	2	1	0	0	37	2	276	754	1782	-774	[266,743,287,767]	137.8	0.9507	0.6517	2231	4	1	4950	4878	10058	1756	767247	3	2
Male	Control	TRUE	A	2	1	0	0	37	3	294	135	1792	-407	[282,123,307,150]	190.9	1.008	0.8469	1182	6	1	3786	3486	8939	1642	443017	5	3
Male	Control	TRUE	A	2	1	0	0	39	1	500	538	624	-645	[489,527,519,551]	215.2	0.946	0.6951	2027	4	1	4542	3754	10191	2095	962803	3	1
Male	Control	TRUE	A	2	1	0	0	39	2	564	599	660	-683	[552,587,576,619]	222.5	0.965	0.695	1844	5	1	8290	8184	15390	3150	837251	4	2
Male	Control	TRUE	A	2	1	0	0	39	3	168	635	428	-704	[155,623,188,656]	225	0.8949	0.4299	1304	6	1	5142	5046	9799	1998	596439	5	3
Male	Control	TRUE	A	2	1	0	0	39	4	783	782	790	-793	[773,769,792,804]	201.8	0.8853	0.5011	1638	7	1	5823	5671	10515	2404	727878	6	4
Male	Control	TRUE	A	2	1	0	0	40	1	959	1057	250	-953	[949,1047,974,1069]	163.8	0.9669	0.7436	2302	1	1	6876	6962	12273	2477	880100	1	1
Male	Control	TRUE	A	2	1	0	0	41	1	532	234	-649	-466	[524,226,543,247]	107.9	0.9571	0.5839	1925	1	1	4770	4985	7651	1791	500894	1	1
Male	Control	TRUE	A	2	1	0	0	42	1	673	870	-1212	-839	[662,840,683,888]	262.6	0.7895	0.362	1161	4	1	4425	4262	10067	1714	668137	4	1
Male	Control	TRUE	A	2	1	0	0	43	1	931	94	-1706	-383	[918,82,944,112]	212.3	0.9002	0.6598	1354	1	1	4927	4667	9262	2080	541936	1	1
Male	Control	TRUE	A	2	1	0	0	44	1	777	335	-2443	-524	[767,318,788,350]	186	0.8925	0.5903	1176	1	1	3917	3637	7785	1626	458248	1	1
Male	Control	TRUE	A	2	1	0	0	44	2	851	377	-2400	-549	[832,360,865,393]	238.4	0.914	0.4624	1348	2	1	3779	3546	7181	1712	634913	2	2
Male	Control	TRUE	A	2	1	0	0	44	3	125	692	-2829	-736	[110,678,140,710]	264.4	0.9973	0.7826	2951	3	1	9412	9515	16101	3346	1854120	3	3
Male	Control	TRUE	A	2	1	0	0	47	1	542	720	-641	-1401	[527,711,569,735]	221.5	0.781	0.3771	2055	4	1	10233	9543	20496	4116	972158	4	1
Male	Control	TRUE	A	2	1	0	0	47	2	840	174	-467	-1077	[826,162,853,190]	225.4	0.9587	0.6984	1029	6	1	2237	2013	4076	1441	391490	6	2
Male	Control	TRUE	A	2	1	0	0	48	1	297	248	-144	-1118	[272,232,319,259]	311.1	0.846	0.4223	1123	2	1	4528	4324	10056	1692	633975	2	1
Male	Control	TRUE	A	2	1	0	0	48	2	1035	329	295	-1167	[1023,317,1049,342]	188.1	1.016	0.8842	1737	3	1	5291	5241	8824	3115	640222	3	2
Male	Control	TRUE	A	2	1	0	0	48	3	130	526	-243	-1284	[114,513,146,540]	229.2	0.9959	0.6997	1603	4	1	4920	5016	9163	2010	752831	4	3
Male	Control	TRUE	A	2	1	0	0	48	4	499	637	-24	-1349	[488,625,510,649]	152.9	0.9766	0.8186	2828	5	1	6814	6339	12798	3006	967525	5	4
Male	Control	TRUE	A	2	1	0	0	48	5	673	897	80	-1504	[662,886,686,909]	150.5	1.002	0.7596	1989	6	1	5393	5269	9687	2545	679529	6	5
Male	Control	TRUE	A	2	1	0	0	49	1	646	84	708	-1022	[627,68,663,100]	209.9	0.8252	0.3648	1745	1	1	7040	6586	12514	3002	682859	1	1
Male	Control	TRUE	A	2	1	0	0	49	2	880	257	847	-1126	[869,247,890,273]	158.9	0.9655	0.7488	1791	4	1	5926	5475	11963	2747	545231	4	2
Male	Control	TRUE	A	2	1	0	0	50	1	729	164	1404	-1070	[718,154,740,176]	139.2	1.011	0.8638	2260	1	1	6460	6172	11519	3259	665388	1	1
Male	Control	TRUE	A	2	1	0	0	50	2	873	271	1490	-1136	[859,257,887,297]	285.8	0.9669	0.5995	1178	3	1	5391	5118	10155	2185	652354	3	2
Male	Control	TRUE	A	2	1	0	0	50	3	160	681	1067	-1376	[147,667,173,698]	230.6	0.9585	0.7604	1553	6	1	4729	4624	7979	2337	647846	6	3
Male	Control	TRUE	A	2	1	0	0	51	1	725	821	2048	-1461	[718,814,734,836]	110.4	0.9506	0.6325	2879	5	1	3966	3908	6940	1417	852646	5	1
Male	Control	TRUE	A	2	1	0	0	52	1	629	185	1991	-1728	[617,172,644,203]	211.6	0.964	0.7155	1407	1	1	4219	3973	7683	1730	637018	1	1
Male	Control	TRUE	A	2	1	0	0	52	2	514	1029	1923	-2228	[502,1018,528,1041]	171.2	0.9453	0.744	1290	5	1	4676	4685	9015	2382	420859	5	2
Male	Control	TRUE	A	2	1	0	0	52	3	391	539	1849	-1939	[378,523,404,561]	254.2	0.8803	0.5893	1574	7	1	3878	3797	5800	2313	531293	7	3
Male	Control	TRUE	A	2	1	0	0	53	1	1035	838	1586	-2114	[1019,819,1053,855]	245.4	0.862	0.387	1430	2	1	5180	5467	9240	1965	720060	2	1
Male	Control	TRUE	A	2	1	0	0	54	1	944	918	886	-2162	[932,901,956,938]	266.8	0.906	0.572	1144	3	1	4339	4686	7028	1582	659461	3	1
Male	Control	TRUE	A	2	1	0	0	54	2	913	1014	865	-2220	[896,1005,924,1026]	157.2	0.9592	0.5908	1982	4	1	6155	5600	13211	2750	633997	4	2
Male	Control	TRUE	A	2	1	0	0	55	1	581	110	24	-1684	[570,99,593,127]	171.6	0.9618	0.6961	2011	2	1	7538	6484	17349	3636	648259	2	1
Male	Control	TRUE	A	2	1	0	0	55	2	27	630	-303	-1991	[13,615,41,645]	227.5	0.9639	0.7269	1729	3	1	7743	6945	19135	3646	813061	3	2
Male	Control	TRUE	A	2	1	0	0	55	3	898	867	213	-2133	[884,854,914,881]	224.7	0.9704	0.7403	1337	5	1	5531	5240	10878	2461	492215	5	3
Male	Control	TRUE	A	2	1	0	0	56	1	534	606	-650	-1977	[521,592,547,620]	205	1.004	0.8039	1518	2	1	4615	4256	8632	2115	609116	1	1
Male	Control	TRUE	A	2	1	0	0	57	1	595	26	-1259	-1634	[578,12,612,45]	271.4	0.9617	0.7071	1546	1	1	6232	6385	9900	2505	791520	1	1
Male	Control	TRUE	A	2	1	0	0	57	2	36	81	-1590	-1666	[27,72,45,92]	108.6	1.002	0.7722	1416	3	1	3238	3124	5730	1475	333498	2	2
Male	Control	TRUE	A	2	1	0	0	57	3	877	649	-1091	-2002	[869,641,890,661]	103.4	0.9519	0.6202	2920	6	1	7782	8181	13142	3145	1603040	4	3
Male	Control	TRUE	A	2	1	0	0	57	4	888	661	-1085	-2010	[875,647,899,675]	167.3	0.9957	0.7138	2407	7	1	7782	8181	13142	3145	1603040	5	4
Male	Control	TRUE	A	2	1	0	0	57	5	980	698	-1030	-2031	[968,683,993,711]	196.9	0.9801	0.6821	2023	8	1	7509	6977	14730	2767	886072	6	5
Male	Control	TRUE	A	2	1	0	0	59	1	1027	153	-356	-2355	[1017,143,1039,166]	146.6	0.9522	0.7639	2151	1	1	6414	6199	12640	3107	628591	1	1
Male	Control	TRUE	A	2	1	0	0	59	2	334	908	-769	-2802	[313,898,350,918]	214.8	0.8821	0.5083	1485	4	1	4811	4629	9074	1984	683114	4	2
Male	Control	TRUE	A	2	1	0	0	60	1	360	502	-106	-2561	[349,483,373,521]	217.3	0.8764	0.4406	1318	1	1	4206	3960	8172	1981	513080	1	1
Male	Control	TRUE	A	2	1	0	0	61	1	169	145	427	-2350	[156,132,185,163]	244.7	0.8933	0.6468	2426	1	1	8546	8619	16954	3300	1333230	1	1
Male	Control	TRUE	A	2	1	0	0	61	2	610	957	688	-2832	[601,946,622,970]	139.6	0.9936	0.729	1670	2	1	4835	4687	7825	2572	497965	2	2
Male	Control	TRUE	A	2	1	0	0	61	3	21	993	338	-2852	[10,984,30,1002]	107.9	0.9571	0.8205	3126	3	1	7052	7263	11993	3210	803925	3	3
Male	Control	TRUE	A	3	1	0	0	1	1	391	33	-88	296	[383,25,400,55]	155.7	0.9076	0.5302	1687	2	1	3793	3728	7224	1511	610682	2	2
Male	Control	TRUE	A	3	1	0	0	1	2	913	146	222	233	[902,135,925,158]	154.7	1.019	0.8871	1348	3	1	3357	3207	6174	2074	369317	3	3
Male	Control	TRUE	A	3	1	0	0	1	3	119	222	-249	190	[104,204,134,236]	240.1	0.9062	0.6087	1368	4	1	5830	5542	9963	2788	588791	4	4
Male	Control	TRUE	A	3	1	0	0	1	4	347	386	-114	90	[333,368,362,404]	240.8	0.8849	0.4665	1048	6	1	2324	2169	3868	1410	399755	6	5
Male	Control	TRUE	A	3	1	0	0	1	5	780	545	143	-2	[766,522,793,565]	274.2	0.8882	0.4188	976.9	8	1	3759	3569	6935	1573	522517	8	6
Male	Control	TRUE	A	3	1	0	0	2	1	578	164	-622	2806	[566,151,593,177]	187	0.9225	0.5405	2065	1	1	5759	5235	10947	3350	794746	1	1
Male	Control	TRUE	A	3	1	0	0	2	2	852	176	-462	2800	[835,162,866,187]	171.9	0.9182	0.516	2649	2	1	8504	8754	15578	2906	1131090	2	2
Male	Control	TRUE	A	3	1	0	0	2	3	345	222	-757	2768	[335,212,370,243]	226.1	0.8974	0.5223	1474	3	1	4175	4265	6391	2063	601183	3	3
Male	Control	TRUE	A	3	1	0	0	2	4	214	229	-839	2768	[203,214,226,240]	156.8	0.9113	0.6276	3054	4	1	8812	9293	16157	3707	1172040	4	4
Male	Control	TRUE	A	3	1	0	0	2	5	256	656	-813	2514	[245,645,269,668]	168.1	0.9656	0.8446	2750	8	1	6166	6357	12590	2171	1153060	6	5
Male	Control	TRUE	A	3	1	0	0	3	1	822	22	167	2888	[806,12,833,40]	175.8	0.8029	0.5501	1725	1	1	3891	3806	8088	1508	980605	1	1
Male	Control	TRUE	A	3	1	0	0	3	2	801	25	156	2887	[790,15,814,38]	137.5	0.8698	0.6283	1068	2	1	3891	3806	8088	1508	980605	2	2
Male	Control	TRUE	A	3	1	0	0	3	3	463	190	-45	2791	[453,180,475,201]	142.4	1.005	0.8618	2921	4	1	8008	7633	14511	3642	953006	4	3
Male	Control	TRUE	A	3	1	0	0	3	4	1048	225	303	2770	[1038,215,1064,235]	149.4	0.9802	0.6542	2165	5	1	5635	5109	11443	2384	749405	5	4
Male	Control	TRUE	A	3	1	0	0	3	5	1034	304	295	2723	[1013,293,1060,315]	281.3	0.832	0.4372	1454	6	1	7425	7864	12655	2789	905849	6	5
Male	Control	TRUE	A	3	1	0	0	3	6	67	388	-281	2673	[54,377,79,401]	170.9	0.9752	0.6923	1665	7	1	5122	4248	11684	2602	512193	7	6
Male	Control	TRUE	A	3	1	0	0	3	7	393	559	-87	2571	[378,545,406,573]	232	0.9619	0.8562	4357	8	1	10479	10194	25728	4189	2368310	8	7
Male	Control	TRUE	A	3	1	0	0	3	8	1005	560	277	2571	[993,547,1019,574]	192.7	0.9826	0.7555	1655	9	1	6640	6505	12439	2559	723787	9	8
Male	Control	TRUE	A	3	1	0	0	3	9	203	890	-199	2375	[189,875,219,908]	265.8	0.95	0.6616	1502	11	1	3943	3994	7540	1630	887092	11	9
Male	Control	TRUE	A	3	1	0	0	3	10	80	995	-272	2313	[70,985,91,1005]	121.6	0.9879	0.8338	2814	12	1	7252	6797	13007	3798	732422	12	10
Male	Control	TRUE	A	3	1	0	0	4	1	805	352	803	2692	[795,342,814,369]	166.6	0.9155	0.6212	2057	2	1	6895	6576	12770	2775	751591	2	1
Male	Control	TRUE	A	3	1	0	0	4	2	705	531	744	2588	[687,517,721,546]	242.6	0.9236	0.6267	1481	3	1	7479	6860	13299	3061	710549	3	2
Male	Control	TRUE	A	3	1	0	0	4	3	1006	775	922	2441	[995,760,1017,796]	231	0.8631	0.5336	1570	4	1	6754	6646	12949	2429	810518	4	3
Male	Control	TRUE	A	3	1	0	0	4	4	151	1027	416	2295	[143,1015,159,1037]	102.3	0.9263	0.5811	1420	6	1	3250	3188	5310	1659	318463	6	4
Male	Control	TRUE	A	3	1	0	0	5	1	448	12	1885	2249	[439,3,464,22]	135.4	0.9577	0.6125	3716	1	1	9522	9296	16070	3195	1285480	1	1
Male	Control	TRUE	A	3	1	0	0	5	2	625	214	1988	2129	[614,204,636,227]	148	0.9747	0.8346	1523	3	1	3322	3165	6488	2017	415238	3	2
Male	Control	TRUE	A	3	1	0	0	5	3	537	251	1935	2107	[520,238,549,270]	231.3	0.8749	0.686	1383	4	1	5041	5111	7866	2398	539424	4	3
Male	Control	TRUE	A	3	1	0	0	5	4	651	377	2004	2034	[638,362,664,391]	189.8	0.9593	0.5752	1790	6	1	6156	5890	11718	2416	781775	6	4
Male	Control	TRUE	A	3	1	0	0	5	5	491	613	1910	1894	[480,603,506,624]	165.2	0.9719	0.6622	1782	10	1	4557	4429	8247	1813	688036	10	5
Male	Control	TRUE	A	3	1	0	0	6	1	549	721	1298	1831	[536,703,561,733]	178.2	0.8829	0.4757	758.2	7	1	2696	2641	4309	1190	248055	7	1
Male	Control	TRUE	A	3	1	0	0	6	2	1009	788	1571	1788	[997,776,1024,804]	227.5	0.9377	0.7522	1127	8	1	2019	1934	3052	1254	490568	8	2
Male	Control	TRUE	A	3	1	0	0	6	3	627	1025	1344	1649	[615,1010,640,1042]	190.9	0.9066	0.4866	844.7	9	1	2290	2215	4137	1036	325159	9	3
Male	Control	TRUE	A	3	1	0	0	7	1	970	255	902	2105	[957,242,985,271]	218.3	0.9409	0.667	1736	2	1	5540	5011	10975	2848	742369	2	1
Male	Control	TRUE	A	3	1	0	0	7	2	476	763	608	1807	[467,747,484,772]	129.7	0.9002	0.5252	2905	4	1	6299	5824	13261	3039	919693	4	2
Male	Control	TRUE	A	3	1	0	0	8	1	454	114	-50	2189	[443,103,467,126]	153.6	0.9966	0.8199	2868	1	1	6186	5597	12545	2644	1057780	1	1
Male	Control	TRUE	A	3	1	0	0	8	2	661	398	72	2022	[649,383,673,411]	191.6	0.9645	0.729	1976	4	1	7034	6746	12867	3777	717432	4	2
Male	Control	TRUE	A	3	1	0	0	8	3	923	525	229	1946	[908,513,944,539]	251.7	0.9084	0.5735	1782	5	1	8350	7765	15375	3156	977004	5	3
Male	Control	TRUE	A	3	1	0	0	8	4	755	600	130	1901	[744,590,772,613]	176.5	0.9626	0.6194	1844	6	1	7341	7384	12358	2840	697398	6	4
Male	Control	TRUE	A	3	1	0	0	8	5	971	933	257	1699	[961,923,983,962]	253.8	0.8795	0.5049	1007	9	1	4387	4299	8863	1807	500168	9	5
Male	Control	TRUE	A	3	1	0	0	9	1	961	242	-396	2113	[951,233,971,252]	117.8	0.9689	0.7656	2285	2	1	6338	6722	9971	2510	633799	1	1
Male	Control	TRUE	A	3	1	0	0	9	2	833	295	-471	2082	[824,286,844,304]	106.9	0.9715	0.7396	3153	3	1	6821	6415	12332	4012	613906	2	2
Male	Control	TRUE	A	3	1	0	0	9	3	987	301	-380	2078	[975,289,1001,315]	194.4	0.9729	0.8475	2178	4	1	4969	4889	7441	2914	631079	3	3
Male	Control	TRUE	A	3	1	0	0	9	4	506	615	-665	1889	[496,605,516,638]	189.5	0.916	0.5547	1054	6	1	2330	2155	3983	1556	256322	5	4
Male	Control	TRUE	A	3	1	0	0	9	5	195	766	-850	1802	[187,757,203,778]	107.6	0.917	0.7252	2987	7	1	6713	6551	13259	3031	778671	6	5
Male	Control	TRUE	A	3	1	0	0	9	6	646	831	-583	1763	[635,819,658,846]	176.1	0.9929	0.7688	1730	8	1	2702	2676	4370	1605	394467	7	6
Male	Control	TRUE	A	3	1	0	0	9	7	412	874	-722	1737	[402,865,421,892]	161	0.926	0.6501	3884	9	1	9855	8973	17021	5047	1133380	8	7
Male	Control	TRUE	A	3	1	0	0	9	8	120	1002	-894	1663	[110,990,131,1014]	136.8	1	0.7474	2008	13	1	3383	3424	5828	1684	659666	12	8
Male	Control	TRUE	A	3	1	0	0	9	9	206	1043	-843	1638	[192,1026,223,1061]	255.9	0.906	0.5127	1182	14	1	4711	4785	10506	1816	617197	13	9
Male	Control	TRUE	A	3	1	0	0	9	10	502	1040	-667	1640	[492,1030,515,1051]	139.9	0.9769	0.8082	1538	15	1	3826	3850	7563	1599	478285	14	10
Male	Control	TRUE	A	3	1	0	0	10	1	500	29	-1314	2239	[489,18,512,45]	179	1.002	0.7687	1734	2	1	5462	5018	8959	2586	628136	1	1
Male	Control	TRUE	A	3	1	0	0	10	2	539	59	-1292	2222	[526,46,553,74]	215.2	0.9876	0.764	2260	4	1	8612	8735	15080	3054	1119540	3	2
Male	Control	TRUE	A	3	1	0	0	10	3	683	80	-1208	2209	[666,69,694,93]	189.1	0.9571	0.7229	1371	5	1	3475	3073	8403	1582	538653	4	3
Male	Control	TRUE	A	3	1	0	0	10	4	855	664	-1105	1865	[842,643,866,678]	213.8	0.8678	0.5371	964.4	10	1	2831	2902	4825	1114	435975	9	4
Male	Control	TRUE	A	3	1	0	0	11	1	1003	162	-1663	2161	[977,151,1029,175]	314.7	0.7761	0.3842	2073	3	1	7747	8440	12470	2781	1440930	3	1
Male	Control	TRUE	A	3	1	0	0	11	2	500	389	-1961	2026	[486,376,513,402]	204.6	0.9876	0.8015	1886	7	1	6504	5897	12020	2688	839054	7	2
Male	Control	TRUE	A	3	1	0	0	11	3	949	464	-1695	1980	[937,451,961,484]	238.4	0.9384	0.6664	1653	8	1	4889	4584	10944	3296	752913	8	3
Male	Control	TRUE	A	3	1	0	0	11	4	51	618	-2226	1890	[37,607,69,633]	196.5	0.9644	0.5576	2162	10	1	5173	5077	10653	2082	1024180	10	4
Male	Control	TRUE	A	3	1	0	0	11	5	293	415	-2083	2010	[280,402,307,431]	225	1.014	0.8482	1851	13	1	5495	5488	10474	2074	967069	13	5
Male	Control	TRUE	A	3	1	0	0	12	1	485	287	-1970	1441	[473,276,496,300]	163.8	0.9832	0.757	2301	2	1	8688	8272	16204	3248	834018	2	1
Male	Control	TRUE	A	3	1	0	0	12	2	794	319	-1784	1422	[786,311,812,329]	133.9	0.9345	0.5927	2374	3	1	6442	6599	12271	2225	785939	3	2
Male	Control	TRUE	A	3	1	0	0	12	3	1054	430	-1632	1356	[1045,421,1065,441]	118.5	1.012	0.8332	2273	4	1	6282	6183	10390	3301	559065	4	3
Male	Control	TRUE	A	3	1	0	0	12	4	726	746	-1827	1167	[714,733,740,766]	254.2	0.9372	0.6718	1488	5	1	4712	4688	7800	2737	669043	5	4
Male	Control	TRUE	A	3	1	0	0	12	5	626	950	-1886	1047	[615,939,638,964]	168.1	0.9982	0.8333	1472	8	1	4142	3910	9166	1865	509405	8	5
Male	Control	TRUE	A	3	1	0	0	12	6	90	1021	-2204	1004	[79,1010,101,1039]	186.3	0.994	0.746	3140	9	1	9097	7800	18898	4540	1155260	9	6
Male	Control	TRUE	A	3	1	0	0	13	1	814	72	-1127	1568	[800,60,834,85]	228.2	0.9657	0.6182	1305	2	1	5261	4946	9829	2209	589262	1	1
Male	Control	TRUE	A	3	1	0	0	13	2	874	197	-1093	1495	[862,187,887,208]	147.3	0.9894	0.6976	1824	4	1	4777	4604	10647	2352	544535	3	2
Male	Control	TRUE	A	3	1	0	0	13	3	594	556	-1260	1283	[580,536,608,572]	274.6	0.9214	0.6689	1561	6	1	6494	6302	13884	2416	922171	4	3
Male	Control	TRUE	A	3	1	0	0	13	4	373	600	-1390	1255	[363,590,383,613]	141.7	0.9843	0.8369	2138	7	1	6598	6601	12315	3214	666413	5	4
Male	Control	TRUE	A	3	1	0	0	14	1	702	15	-548	1601	[687,3,722,35]	257.4	0.8977	0.4602	759.1	1	1	2010	1835	3645	1283	217048	1	1
Male	Control	TRUE	A	3	1	0	0	14	2	911	270	-425	1452	[902,254,923,283]	167.3	0.8759	0.5797	1968	3	1	4741	4458	11636	2639	711172	3	2
Male	Control	TRUE	A	3	1	0	0	14	3	994	298	-376	1433	[984,288,1008,313]	156.1	0.9717	0.6945	3230	5	1	6330	6412	11210	3837	772277	5	3
Male	Control	TRUE	A	3	1	0	0	14	4	938	387	-409	1381	[924,373,953,403]	239.4	0.9934	0.6784	1126	7	1	4410	3956	9795	1981	551187	7	4
Male	Control	TRUE	A	3	1	0	0	14	5	985	502	-382	1315	[974,482,996,516]	214.1	0.93	0.5935	1718	8	1	7567	7319	15652	2748	832344	8	5
Male	Control	TRUE	A	3	1	0	0	14	6	523	602	-652	1250	[509,587,547,634]	350.9	0.8623	0.3533	784.8	10	1	3002	2868	6117	1315	534275	10	6
Male	Control	TRUE	A	3	1	0	0	14	7	358	828	-754	1120	[343,815,371,841]	196.2	0.9083	0.7056	2006	11	1	6878	6162	12061	3062	811546	11	7
Male	Control	TRUE	A	3	1	0	0	14	8	1033	839	-352	1114	[1023,830,1050,849]	144.5	0.978	0.6689	1241	12	1	3099	3003	5147	1280	393523	12	8
Male	Control	TRUE	A	3	1	0	0	14	9	206	906	-844	1074	[193,891,218,920]	206.7	0.8505	0.7508	1970	14	1	4009	3856	6420	2017	765793	14	9
Male	Control	TRUE	A	3	1	0	0	14	10	396	1041	-728	993	[385,1030,418,1057]	226.1	0.9217	0.5329	1447	15	1	5482	5246	12077	2037	734539	15	10
Male	Control	TRUE	A	3	1	0	0	15	1	930	459	233	1340	[920,449,946,470]	163.8	0.9669	0.714	1810	2	1	5189	4787	10263	2112	679821	1	1
Male	Control	TRUE	A	3	1	0	0	15	2	706	827	98	1119	[689,811,720,847]	214.1	0.8352	0.368	2319	3	1	8819	9309	13986	3066	1172960	2	2
Male	Control	TRUE	A	3	1	0	0	15	3	831	921	173	1065	[819,909,844,936]	205.7	0.9478	0.7211	1653	5	1	6869	6407	12881	2588	714355	4	4
Male	Control	TRUE	A	3	1	0	0	16	1	475	117	608	1542	[464,106,487,130]	161	0.9898	0.8171	3289	1	1	11091	11009	19784	4295	1153510	1	1
Male	Control	TRUE	A	3	1	0	0	16	2	337	389	525	1380	[326,370,349,405]	222.5	0.9132	0.6113	2116	2	1	8979	8836	17964	3194	1086450	2	2
Male	Control	TRUE	A	3	1	0	0	16	3	492	544	618	1288	[481,524,505,566]	260.5	0.9043	0.5026	1296	3	1	5091	4619	9619	2515	666912	3	3
Male	Control	TRUE	A	3	1	0	0	16	4	489	683	616	1207	[476,670,502,697]	190.9	1.008	0.8012	2259	4	1	7029	7345	13309	2788	920783	4	4
Male	Control	TRUE	A	3	1	0	0	16	5	942	742	885	1172	[930,729,954,755]	181.1	0.9773	0.7808	1195	6	1	4169	4385	7497	1655	446057	6	5
Male	Control	TRUE	A	3	1	0	0	17	1	299	21	1149	1597	[286,9,312,42]	242.6	0.974	0.6705	2777	1	1	8163	8155	15375	3052	1599870	1	1
Male	Control	TRUE	A	3	1	0	0	17	2	94	148	1026	1523	[82,133,102,163]	146.6	0.7954	0.4561	1745	2	1	4153	4076	6886	1860	531545	2	2
Male	Control	TRUE	A	3	1	0	0	17	3	117	144	1039	1524	[99,128,129,170]	250.3	0.8312	0.3621	1469	3	1	2778	2675	4057	1609	672306	3	3
Male	Control	TRUE	A	3	1	0	0	17	4	823	460	1460	1338	[814,451,833,472]	128.3	0.9626	0.7765	2996	6	1	7860	8382	12431	2792	951000	6	4
Male	Control	TRUE	A	3	1	0	0	17	5	697	467	1384	1334	[686,456,708,478]	130.1	0.9017	0.6667	2313	7	1	6180	5942	10435	3256	531465	7	5
Male	Control	TRUE	A	3	1	0	0	17	6	940	797	1529	1138	[928,784,951,814]	207.1	0.9247	0.72	1508	10	1	5153	4815	9550	2437	639031	10	6
Male	Control	TRUE	A	3	1	0	0	17	7	965	1045	1544	989	[956,1036,974,1065]	157.9	0.915	0.5445	1776	11	1	3060	2968	5619	1263	700701	11	7
Male	Control	TRUE	A	3	1	0	0	18	1	627	35	1993	1590	[615,28,651,43]	148	0.7012	0.3891	1390	2	1	4780	4806	8066	1920	1032440	2	1
Male	Control	TRUE	A	3	1	0	0	18	2	610	308	1981	1429	[599,297,625,320]	184.2	0.9719	0.7784	1631	3	1	5447	4819	11185	2577	550165	3	2
Male	Control	TRUE	A	3	1	0	0	18	3	553	316	1946	1423	[540,302,568,336]	239.8	0.9172	0.5711	1866	4	1	6990	6215	13641	3032	915732	4	3
Male	Control	TRUE	A	3	1	0	0	18	4	274	939	1782	1054	[263,929,293,949]	170.9	0.9595	0.6204	1759	7	1	4542	4375	9013	1765	708600	6	4
Male	Control	TRUE	A	3	1	0	0	18	5	789	998	2086	1019	[778,988,803,1011]	165.2	0.9405	0.7278	2036	8	1	6373	5965	12462	2747	688291	7	5
Male	Control	TRUE	A	3	1	0	0	18	6	1035	649	2232	1227	[1022,636,1052,662]	220.1	1.016	0.8066	1338	9	1	2151	2248	3178	925	726951	8	6
Male	Control	TRUE	A	3	1	0	0	19	1	473	277	2544	801	[461,268,486,287]	133.2	0.9846	0.6703	3116	3	1	8350	7230	15855	4315	784873	2	1
Male	Control	TRUE	A	3	1	0	0	19	2	754	644	2710	583	[740,631,768,659]	205.7	0.8594	0.5238	3185	10	1	7198	7159	14753	2862	986061	9	2
Male	Control	TRUE	A	3	1	0	0	19	3	848	698	2767	552	[836,686,861,710]	173.3	0.9835	0.8557	1996	11	1	4707	4477	10071	2970	658984	10	3
Male	Control	TRUE	A	3	1	0	0	19	4	578	827	2606	474	[570,817,586,840]	114.6	0.953	0.6907	3527	14	1	10996	10864	19504	3910	978666	13	4
Male	Control	TRUE	A	3	1	0	0	19	5	318	870	2451	449	[303,862,328,880]	124.1	0.9257	0.558	2776	15	1	8145	8234	14374	2988	822614	14	5
Male	Control	TRUE	A	3	1	0	0	19	6	753	880	2714	444	[734,869,785,892]	302	0.7804	0.3934	1386	16	1	6989	7030	12035	2875	880563	15	6
Male	Control	TRUE	A	3	1	0	0	20	1	856	99	2126	906	[846,89,869,114]	153.6	0.8857	0.7047	1518	1	1	3174	2632	7676	1618	498257	1	1
Male	Control	TRUE	A	3	1	0	0	20	2	896	144	2150	881	[883,130,918,159]	265.4	0.9032	0.6836	1957	2	1	7058	7376	12736	2731	1157460	2	2
Male	Control	TRUE	A	3	1	0	0	20	3	406	343	1859	761	[395,332,417,359]	181.8	0.9642	0.7384	2622	3	1	9292	9246	14384	4112	1050000	3	3
Male	Control	TRUE	A	3	1	0	0	20	4	780	377	2080	742	[768,367,791,389]	135.4	0.9939	0.7757	1925	4	1	5130	5203	9081	2297	718155	4	4
Male	Control	TRUE	A	3	1	0	0	20	5	1042	401	2235	727	[1030,389,1053,415]	171.2	0.9926	0.7234	1638	5	1	4297	4010	8942	2036	567258	5	5
Male	Control	TRUE	A	3	1	0	0	20	6	426	783	1870	501	[416,772,438,796]	144.5	0.978	0.6617	1993	8	1	5789	5865	9826	2227	654193	8	6
Male	Control	TRUE	A	3	1	0	0	21	1	72	595	1016	612	[58,582,90,610]	239.4	0.9934	0.7423	1478	5	1	4906	4440	8339	2559	701536	4	1
Male	Control	TRUE	A	3	1	0	0	21	2	796	730	1445	534	[784,708,816,743]	224.3	0.8268	0.5306	1303	6	1	3396	3304	6327	1485	638436	5	2
Male	Control	TRUE	A	3	1	0	0	21	3	625	805	1343	488	[612,794,639,816]	170.9	0.9595	0.6803	2155	8	1	5935	5722	11681	2355	854606	7	3
Male	Control	TRUE	A	3	1	0	0	21	4	700	970	1388	391	[691,961,713,979]	123.8	0.9599	0.6988	1930	9	1	4694	4849	7684	1781	586763	8	4
Male	Control	TRUE	A	3	1	0	0	21	5	612	974	1335	388	[600,962,624,986]	174.4	0.9712	0.7687	2222	10	1	6694	6430	12811	2718	903741	9	5
Male	Control	TRUE	A	3	1	0	0	22	1	834	44	819	940	[814,28,852,58]	280.9	0.8904	0.5547	1580	1	1	5946	5777	11602	2360	945435	1	1
Male	Control	TRUE	A	3	1	0	0	22	2	901	409	862	722	[890,398,918,421]	181.4	0.9631	0.6573	2134	4	1	6093	6183	9269	2428	913934	4	2
Male	Control	TRUE	A	3	1	0	0	22	3	669	580	722	621	[654,569,680,593]	184.9	0.9896	0.8107	1224	8	1	3430	3538	5415	1288	507683	8	3
Male	Control	TRUE	A	3	1	0	0	22	4	239	861	467	454	[226,850,250,874]	170.9	1.008	0.8028	1406	11	1	4590	3870	9071	2415	436005	11	4
Male	Control	TRUE	A	3	1	0	0	23	1	358	518	-108	658	[346,507,369,530]	149.1	1.014	0.8737	4748	2	1	7774	7434	13878	5565	1181670	2	1
Male	Control	TRUE	A	3	1	0	0	24	1	398	20	-731	950	[385,9,408,43]	188.8	0.9006	0.463	1272	1	1	3461	3146	7224	1463	526111	1	1
Male	Control	TRUE	A	3	1	0	0	24	2	69	312	-926	780	[51,302,82,325]	194.4	0.9301	0.5926	1545	4	1	4635	4528	7692	2811	551528	4	2
Male	Control	TRUE	A	3	1	0	0	24	3	409	347	-723	760	[395,333,423,364]	242.9	0.9366	0.708	2053	5	1	5944	6079	10264	2367	1034280	5	3
Male	Control	TRUE	A	3	1	0	0	24	4	836	518	-469	653	[826,507,848,551]	279.5	0.8382	0.4284	1073	10	1	4104	3753	9302	1695	607422	10	4
Male	Control	TRUE	A	3	1	0	0	24	5	31	559	-945	634	[21,550,48,573]	162.1	0.9003	0.6333	1896	11	1	6251	6770	10674	2315	756430	11	5
Male	Control	TRUE	A	3	1	0	0	24	6	943	624	-406	595	[930,612,955,638]	188.8	0.9709	0.784	1689	12	1	4320	3958	8243	2243	699869	12	6
Male	Control	TRUE	A	3	1	0	0	24	7	646	795	-582	493	[637,786,657,808]	125.9	0.9887	0.6813	2722	14	1	7129	6022	13660	3600	727158	14	7
Male	Control	TRUE	A	3	1	0	0	25	1	31	159	-1591	871	[21,151,46,168]	123.1	0.9385	0.6211	2626	5	1	5574	5477	9687	3173	713430	5	1
Male	Control	TRUE	A	3	1	0	0	25	2	437	162	-1352	869	[426,151,449,174]	156.5	0.9899	0.8913	1848	6	1	5976	5653	10881	2828	579687	6	2
Male	Control	TRUE	A	3	1	0	0	25	3	1034	292	-1000	792	[1014,280,1046,305]	216.2	0.9762	0.6646	1377	8	1	4609	4253	8967	2682	543901	8	3
Male	Control	TRUE	A	3	1	0	0	26	1	678	228	-1855	830	[667,217,690,241]	169.5	0.9865	0.88	2215	3	1	6888	6954	11047	3110	847226	2	1
Male	Control	TRUE	A	3	1	0	0	26	2	1041	338	-1639	765	[1032,329,1054,348]	127.6	0.9779	0.7942	1994	5	1	5599	4981	10303	2761	531860	4	2
Male	Control	TRUE	A	3	1	0	0	26	3	218	547	-2128	641	[204,532,232,563]	240.1	0.9815	0.765	1598	8	1	6830	6852	11776	2756	785409	6	3
Male	Control	TRUE	A	3	1	0	0	26	4	931	1034	-1705	354	[918,1006,943,1053]	282.7	0.7735	0.4427	933.2	9	1	3418	3113	6513	1482	529767	7	4
Male	Control	TRUE	A	3	1	0	0	26	5	956	1050	-1691	342	[945,1037,966,1067]	168.1	0.9348	0.5918	1966	10	1	5907	6192	9274	2563	738321	8	5
Male	Control	TRUE	A	3	1	0	0	27	1	600	79	-2547	918	[588,67,613,93]	180.7	1.008	0.8516	2549	1	1	6677	6022	14005	4154	801231	1	1
Male	Control	TRUE	A	3	1	0	0	27	2	955	184	-2336	856	[944,173,968,196]	165.6	0.9895	0.7896	1886	3	1	3633	3388	6983	1147	679337	3	2
Male	Control	TRUE	A	3	1	0	0	27	3	512	503	-2600	668	[503,493,521,513]	111.4	0.9759	0.8072	3087	6	1	6585	6320	13101	3130	770473	5	3
Male	Control	TRUE	A	3	1	0	0	27	4	509	679	-2599	562	[496,662,529,700]	252.8	0.789	0.521	1338	8	1	5223	4949	9385	2194	971429	7	4
Male	Control	TRUE	A	3	1	0	0	27	5	699	683	-2488	560	[685,670,711,697]	196.5	0.9791	0.7364	1184	9	1	3442	3081	7075	1592	447437	8	5
Male	Control	TRUE	A	3	1	0	0	27	6	517	958	-2596	396	[506,947,531,974]	173	0.9665	0.5932	1707	12	1	6219	4927	12820	2969	659201	11	6
Male	Control	TRUE	A	3	1	0	0	28	1	703	308	-2486	135	[689,296,715,328]	232.4	0.9497	0.7219	1728	2	1	5787	6266	8953	2165	908610	2	1
Male	Control	TRUE	A	3	1	0	0	28	2	880	723	-2381	-109	[869,710,892,738]	165.9	0.9584	0.5828	1442	6	1	3850	3413	8219	1605	531272	6	2
Male	Control	TRUE	A	3	1	0	0	28	3	64	895	-2865	-210	[51,883,77,907]	171.6	0.9465	0.7194	1958	7	1	6121	5903	11971	2962	710067	7	3
Male	Control	TRUE	A	3	1	0	0	28	4	518	1006	-2597	-278	[504,994,532,1024]	207.1	0.9799	0.5483	929.2	9	1	2181	2144	3888	1227	294443	9	4
Male	Control	TRUE	A	3	1	0	0	28	5	307	276	-2718	155	[292,264,333,292]	268.6	0.867	0.4831	1508	10	1	7583	7225	15567	3211	743175	10	5
Male	Control	TRUE	A	3	1	0	0	29	1	687	328	-1848	126	[675,317,707,339]	206	0.9627	0.6286	3434	2	1	10759	10256	22692	3908	1689170	2	1
Male	Control	TRUE	A	3	1	0	0	29	2	783	1059	-1794	-309	[770,1047,794,1072]	172.6	0.9974	0.765	1699	6	1	4321	3909	7469	2477	544392	6	2
Male	Control	TRUE	A	3	1	0	0	30	1	1014	107	-1008	257	[1000,90,1037,126]	305.9	0.865	0.5169	927.5	2	1	3320	3552	5613	1251	601004	2	1
Male	Control	TRUE	A	3	1	0	0	30	2	814	141	-1128	236	[802,130,828,154]	174.4	1.003	0.7753	2245	3	1	6259	5701	12607	2793	895049	3	2
Male	Control	TRUE	A	3	1	0	0	30	3	653	214	-1224	191	[640,196,665,235]	262.6	0.9199	0.5982	1410	4	1	6654	6362	12250	2930	771846	4	3
Male	Control	TRUE	A	3	1	0	0	30	4	364	277	-1395	155	[349,262,382,293]	306.2	0.9942	0.87	2316	5	1	7454	7415	12711	3251	1624890	5	4
Male	Control	TRUE	A	3	1	0	0	30	5	989	306	-1024	139	[975,290,1005,321]	232.7	0.9505	0.6297	1840	6	1	6765	6524	12895	2915	906470	6	5
Male	Control	TRUE	A	3	1	0	0	30	6	34	659	-1591	-72	[24,649,46,672]	150.5	0.9506	0.7147	2425	7	1	7120	7146	11645	3574	754737	7	6
Male	Control	TRUE	A	3	1	0	0	30	7	516	853	-1307	-189	[502,842,527,874]	208.8	0.9427	0.6139	2069	8	1	8430	8027	15885	3323	952602	8	7
Male	Control	TRUE	A	3	1	0	0	31	1	276	860	-802	-191	[265,849,287,877]	175.4	0.9012	0.5875	2473	1	1	9079	9166	15253	3404	1007790	1	1
Male	Control	TRUE	A	3	1	0	0	31	2	152	913	-875	-221	[142,903,164,923]	131.1	0.9752	0.8771	1389	2	1	3315	3346	5103	1817	384501	2	2
Male	Control	TRUE	A	3	1	0	0	32	1	179	110	432	254	[168,97,190,125]	175.1	1.006	0.7191	1688	2	1	5764	5603	11490	2083	662824	2	1
Male	Control	TRUE	A	3	1	0	0	32	2	16	230	336	183	[6,218,27,244]	162.4	0.962	0.7213	1394	3	1	4354	4021	7812	1726	487656	3	2
Male	Control	TRUE	A	3	1	0	0	32	3	708	247	746	173	[696,239,722,260]	141.3	0.9154	0.4994	3094	4	1	6297	6137	12355	3526	1057850	4	3
Male	Control	TRUE	A	3	1	0	0	32	4	304	470	506	41	[287,456,319,489]	253.5	0.9238	0.5385	1451	5	1	6075	5625	12124	2718	716842	5	4
Male	Control	TRUE	A	3	1	0	0	32	5	776	567	786	-17	[761,555,791,580]	209.5	0.9723	0.6638	1584	6	1	6015	5326	12417	2464	685711	6	5
Male	Control	TRUE	A	3	1	0	0	32	6	222	820	458	-167	[212,810,233,833]	144.8	0.9973	0.8512	2170	9	1	4845	4760	7670	2672	683213	9	6
Male	Control	TRUE	A	3	1	0	0	33	1	484	65	1259	279	[472,53,496,83]	212	0.979	0.7476	2293	1	1	7026	7492	11832	2474	1152190	1	1
Male	Control	TRUE	A	3	1	0	0	33	2	560	175	1304	215	[547,161,570,189]	176.8	0.9338	0.686	2157	2	1	5667	5292	11658	2471	765099	2	2
Male	Control	TRUE	A	3	1	0	0	33	3	755	346	1420	115	[742,335,770,357]	161	0.9413	0.6181	1146	3	1	2648	2569	4573	1457	383993	3	3
Male	Control	TRUE	A	3	1	0	0	33	4	575	543	1314	-3	[562,530,595,557]	253.1	0.8674	0.559	2636	7	1	11564	11488	19828	5709	1445480	7	4
Male	Control	TRUE	A	3	1	0	0	33	5	480	551	1256	-5	[467,531,492,566]	226.4	0.9103	0.4964	1986	8	1	8072	7712	15587	2966	1025150	8	5
Male	Control	TRUE	A	3	1	0	0	33	6	263	807	1126	-159	[248,796,273,820]	170.5	0.9137	0.7061	2043	9	1	3518	3503	5471	1578	545247	9	6
Male	Control	TRUE	A	3	1	0	0	33	7	398	1000	1208	-274	[388,990,408,1014]	141.7	1.002	0.7547	1570	10	1	3208	3282	5470	1267	545349	10	7
Male	Control	TRUE	A	3	1	0	0	34	1	25	487	1634	31	[15,478,39,497]	137.8	1.005	0.7388	1495	3	1	3254	3060	6483	1461	475093	2	1
Male	Control	TRUE	A	3	1	0	0	34	2	262	591	1773	-30	[251,576,272,603]	140.6	0.9452	0.5862	2463	4	1	6832	6401	14613	2763	778873	3	2
Male	Control	TRUE	A	3	1	0	0	34	3	165	643	1716	-62	[154,633,179,654]	156.1	0.9717	0.7615	3662	5	1	9323	9305	18841	3932	1267880	4	3
Male	Control	TRUE	A	3	1	0	0	34	4	422	682	1868	-86	[408,669,438,699]	245	0.9414	0.6196	1771	6	1	6648	6229	12708	2767	957362	5	4
Male	Control	TRUE	A	3	1	0	0	34	5	501	803	1916	-155	[490,785,515,816]	201.1	0.8959	0.5821	4469	8	1	11089	11113	21991	4122	2273300	7	5
Male	Control	TRUE	A	3	1	0	0	35	1	470	116	2543	251	[457,104,485,128]	197.9	0.9401	0.6338	1374	2	1	5381	4813	11170	2356	511223	2	1
Male	Control	TRUE	A	3	1	0	0	35	2	829	165	2755	221	[819,155,840,180]	152.9	1.012	0.7766	1824	3	1	4337	4235	8048	2437	498749	3	2
Male	Control	TRUE	A	3	1	0	0	35	3	718	1016	2691	-284	[707,1005,737,1029]	198.6	0.9561	0.6139	1656	7	1	5131	5185	8984	1937	749120	7	3
Male	Control	TRUE	A	3	1	0	0	36	1	416	431	2510	-582	[406,421,427,444]	133.6	0.9861	0.7647	2514	1	1	6561	6009	13382	2895	741435	1	1
Male	Control	TRUE	A	3	1	0	0	36	2	283	821	2429	-813	[262,810,299,833]	241.5	0.9212	0.5646	2015	3	1	6572	6557	10919	2970	1051450	3	2
Male	Control	TRUE	A	3	1	0	0	37	1	696	434	2031	-584	[686,424,709,445]	154	0.9638	0.8138	1827	4	1	4345	4095	7323	2819	386714	3	1
Male	Control	TRUE	A	3	1	0	0	37	2	193	492	1733	-618	[181,479,211,505]	234.1	0.967	0.7522	1569	5	1	6853	6213	13303	2983	698977	4	2
Male	Control	TRUE	A	3	1	0	0	37	3	126	575	1693	-667	[114,565,141,587]	161.7	0.9437	0.6163	2008	6	1	5729	5072	13945	2644	721829	5	3
Male	Control	TRUE	A	3	1	0	0	37	4	911	609	2159	-688	[892,594,930,629]	335.4	0.9547	0.6179	2108	7	1	10526	10494	19135	4142	1368430	6	4
Male	Control	TRUE	A	3	1	0	0	37	5	767	624	2072	-696	[753,610,782,638]	239.8	0.8501	0.628	1852	8	1	4244	4476	7110	1605	1056780	7	5
Male	Control	TRUE	A	3	1	0	0	37	6	480	1029	1902	-936	[469,1018,492,1040]	154	0.9806	0.804	1754	10	1	5622	5500	10551	2045	635232	9	6
Male	Control	TRUE	A	3	1	0	0	38	1	107	102	1035	-388	[97,93,116,117]	134.3	0.9532	0.72	2949	1	1	5065	4800	10747	2422	921845	1	1
Male	Control	TRUE	A	3	1	0	0	38	2	235	384	1114	-554	[224,374,257,394]	192	0.8965	0.5262	1626	2	1	5192	5063	9321	2016	711321	2	2
Male	Control	TRUE	A	3	1	0	0	38	3	528	478	1285	-611	[517,465,540,495]	182.5	0.9664	0.6609	1825	3	1	6111	5569	13287	2703	678348	3	3
Male	Control	TRUE	A	3	1	0	0	38	4	763	567	1424	-663	[750,551,776,584]	219.4	0.9305	0.6431	3726	5	1	11396	10899	20680	4366	1971440	5	4
Male	Control	TRUE	A	3	1	0	0	38	5	225	747	1105	-769	[212,736,236,760]	160	0.9694	0.6734	2898	6	1	7401	7255	12697	3455	976906	6	5
Male	Control	TRUE	A	3	1	0	0	39	1	439	104	585	-388	[421,94,454,115]	191.6	0.9221	0.5367	2136	1	1	7562	7595	13238	2765	914969	1	1
Male	Control	TRUE	A	3	1	0	0	39	2	291	189	499	-439	[281,178,303,204]	154.7	0.9665	0.6542	2747	2	1	8227	8215	14589	3349	962589	2	2
Male	Control	TRUE	A	3	1	0	0	40	1	837	419	177	-576	[828,409,847,433]	136.1	0.997	0.754	2625	2	1	7024	7334	11572	2573	856922	2	1
Male	Control	TRUE	A	3	1	0	0	40	2	41	703	-295	-743	[23,684,56,727]	316.4	0.8109	0.5344	1437	4	1	7039	6513	13998	3187	922163	4	2
Male	Control	TRUE	A	3	1	0	0	40	3	854	829	186	-818	[843,817,868,843]	164.5	0.9535	0.6491	1926	5	1	6291	6663	10882	2204	767528	5	3
Male	Control	TRUE	A	3	1	0	0	41	1	872	145	-450	-412	[858,138,880,153]	105.8	0.8235	0.5388	931.5	2	1	5687	6051	9365	2094	915539	2	1
Male	Control	TRUE	A	3	1	0	0	41	2	145	263	-880	-483	[135,252,155,276]	141.3	0.9828	0.7177	2933	3	1	8316	7891	15442	3548	972932	3	2
Male	Control	TRUE	A	3	1	0	0	41	3	459	303	-693	-506	[448,290,472,318]	178.6	0.925	0.6148	1767	4	1	6835	6172	12841	2778	683506	4	3
Male	Control	TRUE	A	3	1	0	0	41	4	436	555	-706	-655	[426,545,455,566]	162.4	0.754	0.7098	2582	6	1	6721	6576	11571	3558	799845	6	4
Male	Control	TRUE	A	3	1	0	0	41	5	254	571	-814	-666	[238,554,271,589]	312.2	1.005	0.7742	2259	7	1	10041	9349	17008	3929	1385660	7	5
Male	Control	TRUE	A	3	1	0	0	41	6	613	902	-603	-862	[597,890,628,920]	201.8	0.8612	0.4313	2420	9	1	10445	9783	19687	4570	898283	9	6
Male	Control	TRUE	A	3	1	0	0	42	1	566	533	-1276	-643	[557,523,576,545]	118.5	0.9921	0.7788	1873	4	1	3567	3244	8916	1382	513605	4	1
Male	Control	TRUE	A	3	1	0	0	42	2	831	705	-1119	-744	[818,692,845,719]	207.4	0.9809	0.8116	1522	5	1	5517	5634	9321	2077	695099	5	2
Male	Control	TRUE	A	3	1	0	0	43	1	842	112	-1758	-393	[830,100,854,127]	191.6	0.9794	0.8192	1934	1	1	5470	5123	10174	2266	793136	1	1
Male	Control	TRUE	A	3	1	0	0	43	2	805	204	-1780	-447	[791,191,818,218]	190.9	0.9338	0.7445	2189	2	1	4991	4504	12689	1961	1013250	2	2
Male	Control	TRUE	A	3	1	0	0	43	3	559	871	-1926	-842	[546,858,572,885]	199	1.002	0.8373	2023	3	1	5650	5564	10563	2184	937846	3	3
Male	Control	TRUE	A	3	1	0	0	44	1	806	24	-2425	-340	[792,14,821,35]	179.3	0.9416	0.6581	2860	2	1	6226	6101	11809	2186	1263790	2	1
Male	Control	TRUE	A	3	1	0	0	44	2	164	93	-2806	-383	[153,82,176,107]	170.2	0.9728	0.7955	2348	3	1	7844	7237	15769	3563	792277	3	2
Male	Control	TRUE	A	3	1	0	0	44	3	100	172	-2844	-428	[81,160,116,184]	199.3	0.8667	0.419	2361	4	1	9230	9942	15367	3436	1116860	4	3
Male	Control	TRUE	A	3	1	0	0	44	4	827	323	-2413	-518	[814,312,838,334]	157.9	0.9782	0.804	1787	7	1	4102	3556	9499	2157	574237	7	5
Male	Control	TRUE	A	3	1	0	0	44	5	951	630	-2340	-699	[935,612,965,645]	286.5	0.9335	0.7798	1476	9	1	5152	4947	8291	2169	468790	9	6
Male	Control	TRUE	A	3	1	0	0	45	1	25	281	-2242	-1138	[14,272,38,290]	123.1	0.9566	0.6975	3140	2	1	7946	7474	14087	2858	969372	1	1
Male	Control	TRUE	A	3	1	0	0	45	2	91	412	-2205	-1216	[71,401,102,424]	189.1	0.915	0.6525	3098	4	1	10410	8887	21114	4790	1238800	3	2
Male	Control	TRUE	A	3	1	0	0	45	3	1008	535	-1660	-1290	[996,519,1020,553]	221.5	0.976	0.6584	3140	6	1	10422	10532	18356	3625	1677900	5	3
Male	Control	TRUE	A	3	1	0	0	45	4	243	655	-2112	-1361	[232,644,259,668]	178.6	1.001	0.7486	2041	7	1	6404	6350	12352	2573	806963	6	4
Male	Control	TRUE	A	3	1	0	0	45	5	674	65	-1858	-1011	[660,53,687,79]	202.2	0.9955	0.8389	985	11	1	2757	2501	5225	1312	399715	10	5
Male	Control	TRUE	A	3	1	0	0	46	1	374	427	-1390	-1226	[363,416,386,444]	181.4	1.01	0.7496	2417	2	1	8033	7811	15940	3240	1028290	1	1
Male	Control	TRUE	A	3	1	0	0	46	2	46	582	-1585	-1320	[30,565,60,608]	285.1	0.7615	0.4527	1181	3	1	3040	3037	5134	1218	744803	2	2
Male	Control	TRUE	A	3	1	0	0	46	3	245	879	-1466	-1494	[236,870,255,893]	148.4	0.9266	0.7176	2589	6	1	7842	7798	14884	2815	933203	5	3
Male	Control	TRUE	A	3	1	0	0	46	4	828	910	-1121	-1512	[814,898,840,923]	175.8	1.008	0.7194	1981	8	1	6793	6473	13351	2565	801553	7	4
Male	Control	TRUE	A	3	1	0	0	47	1	408	189	-724	-1084	[397,176,419,200]	153.6	0.9966	0.8383	3228	1	1	8075	7698	13130	4364	1098260	1	1
Male	Control	TRUE	A	3	1	0	0	47	2	211	395	-839	-1207	[200,386,226,405]	147.7	0.9399	0.6746	2786	2	1	6661	6219	13529	2494	1005740	2	2
Male	Control	TRUE	A	3	1	0	0	47	3	910	434	-426	-1230	[900,423,926,446]	151.5	0.8927	0.7071	2558	3	1	7191	7043	14078	2754	920503	3	3
Male	Control	TRUE	A	3	1	0	0	47	4	857	705	-455	-1391	[838,695,882,719]	254.5	0.7923	0.416	1051	4	1	4267	3935	7410	1759	541915	4	4
Male	Control	TRUE	A	3	1	0	0	48	1	189	30	-208	-990	[178,19,200,41]	145.9	1.002	0.8586	2168	1	1	5814	5673	9407	2695	715156	1	1
Male	Control	TRUE	A	3	1	0	0	48	2	603	219	39	-1102	[590,206,618,234]	226.1	0.9217	0.7144	1897	2	1	6201	5439	13590	2562	954911	2	2
Male	Control	TRUE	A	3	1	0	0	48	3	432	328	-63	-1169	[421,316,444,350]	226.1	0.9343	0.6325	2116	3	1	7281	6922	13712	2675	1113930	3	3
Male	Control	TRUE	A	3	1	0	0	48	4	736	677	117	-1375	[723,663,748,697]	231.7	0.9881	0.6813	1826	6	1	6238	5769	12723	2486	892030	6	4
Male	Control	TRUE	A	3	1	0	0	48	5	54	868	-286	-1488	[39,859,77,882]	219.4	0.8699	0.4692	1631	7	1	3538	3456	6918	1303	877529	7	5
Male	Control	TRUE	A	3	1	0	0	48	6	487	1024	-31	-1580	[475,1013,500,1036]	167.3	0.9957	0.8414	2198	8	1	6882	7104	12284	2389	894641	8	6
Male	Control	TRUE	A	3	1	0	0	49	1	746	51	768	-1002	[736,41,757,62]	128	0.9986	0.7717	1762	1	1	5743	5578	10982	2366	493926	1	1
Male	Control	TRUE	A	3	1	0	0	49	2	206	176	448	-1078	[197,166,216,191]	146.3	0.9509	0.7104	2829	3	1	7796	7651	15255	3918	857572	3	2
Male	Control	TRUE	A	3	1	0	0	49	3	616	322	691	-1162	[606,310,626,333]	134.7	0.9724	0.6598	2686	4	1	6852	6553	12335	3419	815413	4	3
Male	Control	TRUE	A	3	1	0	0	49	4	38	798	350	-1444	[25,781,54,812]	236.3	0.8531	0.7142	1521	9	1	6452	6589	10946	2711	729036	9	4
Male	Control	TRUE	A	3	1	0	0	50	1	992	774	1560	-1431	[980,764,1004,784]	138.5	0.9536	0.7104	1437	4	1	4173	4065	7940	1964	396474	4	1
Male	Control	TRUE	A	3	1	0	0	50	2	293	990	1145	-1561	[284,980,303,1008]	153.6	0.9151	0.6325	1546	6	1	5209	4842	11447	2236	484400	6	2
Male	Control	TRUE	A	3	1	0	0	51	1	67	591	1658	-1322	[51,575,85,607]	314.3	0.9854	0.7865	2288	4	1	6624	6830	10748	2386	1715610	4	1
Male	Control	TRUE	A	3	1	0	0	51	2	949	704	2180	-1389	[934,684,962,723]	265.1	0.8916	0.5145	1542	5	1	5537	5851	11143	2004	913581	5	2
Male	Control	TRUE	A	3	1	0	0	51	3	858	726	2125	-1403	[837,711,875,740]	258.1	0.8269	0.548	1193	6	1	4917	4906	9060	1851	658898	6	3
Male	Control	TRUE	A	3	1	0	0	51	4	211	879	1743	-1493	[202,870,223,888]	104.8	1.002	0.7818	3764	8	1	7756	7533	13859	4107	868718	8	4
Male	Control	TRUE	A	3	1	0	0	52	1	1010	77	2217	-1663	[999,66,1025,89]	179	0.9862	0.8344	1813	1	1	6981	6529	12746	2694	740029	1	1
Male	Control	TRUE	A	3	1	0	0	52	2	43	104	1643	-1680	[28,91,57,117]	213.1	0.9539	0.744	1599	2	1	5712	5519	10285	2319	679702	2	2
Male	Control	TRUE	A	3	1	0	0	52	3	147	113	1707	-1684	[135,100,167,125]	238	0.9132	0.64	2856	3	1	11073	11093	18239	3864	1594490	3	3
Male	Control	TRUE	A	3	1	0	0	52	4	937	226	2173	-1751	[922,210,951,242]	258.4	0.9712	0.7578	2570	5	1	7083	6464	16198	2790	1558230	5	4
Male	Control	TRUE	A	3	1	0	0	52	5	562	942	1951	-2178	[554,934,571,956]	121.6	0.9686	0.7058	2436	8	1	7836	7355	15444	2962	673906	8	5
Male	Control	TRUE	A	3	1	0	0	53	1	309	217	1156	-1746	[297,205,323,233]	212.7	0.9264	0.6911	2247	2	1	6515	6509	12607	2282	1146700	2	1
Male	Control	TRUE	A	3	1	0	0	53	2	1039	676	1588	-2020	[1024,663,1052,692]	240.1	0.9552	0.8057	1416	5	1	6107	5925	11007	2444	702288	5	2
Male	Control	TRUE	A	3	1	0	0	53	3	310	784	1156	-2083	[298,772,325,797]	199.3	0.9725	0.8464	2180	7	1	6450	6241	11262	3730	870746	7	3
Male	Control	TRUE	A	3	1	0	0	53	4	28	264	988	-1775	[13,249,43,283]	278.8	0.9894	0.7442	1233	9	1	4728	4773	8149	1942	685523	9	4
Male	Control	TRUE	A	3	1	0	0	54	1	641	84	706	-1670	[631,75,650,101]	154	0.9638	0.684	2119	1	1	4682	4615	7714	2979	660192	1	1
Male	Control	TRUE	A	3	1	0	0	54	2	143	148	409	-1706	[124,138,155,157]	157.9	0.886	0.4912	1724	2	1	4406	4138	8472	2577	515447	2	2
Male	Control	TRUE	A	3	1	0	0	54	3	625	261	697	-1775	[615,251,637,280]	192	0.9369	0.6421	3103	3	1	8795	8296	16197	4138	1354450	3	3
Male	Control	TRUE	A	3	1	0	0	54	4	536	397	642	-1854	[520,386,547,411]	187.4	0.9375	0.6081	2253	4	1	7972	7889	15741	2908	996490	4	4
Male	Control	TRUE	A	3	1	0	0	54	5	862	459	841	-1890	[853,450,883,469]	179.7	0.8871	0.5984	2205	5	1	7793	7624	15174	2975	903962	5	5
Male	Control	TRUE	A	3	1	0	0	54	6	30	964	344	-2189	[15,949,47,979]	289	0.9976	0.836	1405	7	1	5284	5063	10114	2212	834940	7	6
Male	Control	TRUE	A	3	1	0	0	55	1	468	291	-43	-1789	[456,272,480,303]	173.7	0.8958	0.5252	3429	1	1	8208	8267	12870	3523	1280460	1	1
Male	Control	TRUE	A	3	1	0	0	55	2	85	453	-269	-1886	[72,440,100,466]	213.8	1.029	0.8179	1740	3	1	5555	5660	9920	2069	844331	3	2
Male	Control	TRUE	A	3	1	0	0	55	3	732	604	114	-1977	[723,593,741,619]	146.6	0.92	0.6658	2371	5	1	3972	3867	7112	1548	885682	5	3
Male	Control	TRUE	A	3	1	0	0	55	4	262	904	-164	-2154	[251,893,274,919]	154.7	0.9189	0.6491	2910	8	1	7409	7712	13314	2910	1022510	8	4
Male	Control	TRUE	A	3	1	0	0	57	1	172	669	-1510	-2016	[157,660,181,683]	140.3	0.8659	0.686	2172	4	1	5058	5142	8959	2768	627186	4	1
Male	Control	TRUE	A	3	1	0	0	57	2	494	759	-1319	-2070	[475,746,509,776]	253.8	0.9016	0.6577	1813	5	1	7253	7536	12705	2889	1022730	5	2
Male	Control	TRUE	A	3	1	0	0	59	1	805	412	-488	-2511	[796,403,814,432]	169.1	0.9091	0.6071	1627	3	1	4965	4535	9324	2145	565990	2	2
Male	Control	TRUE	A	3	1	0	0	59	2	950	820	-406	-2749	[917,807,967,832]	324.2	0.7901	0.4152	904.4	5	1	2492	2341	4309	1176	613127	4	3
Male	Control	TRUE	A	3	1	0	0	60	1	255	61	-168	-2300	[241,47,272,76]	257	1.021	0.8404	1681	2	1	5301	4804	12045	2370	959447	2	1
Male	Control	TRUE	A	3	1	0	0	60	2	595	209	34	-2387	[579,192,612,227]	329.4	0.9891	0.8535	986	3	1	2961	3159	4144	1664	592142	3	2
Male	Control	TRUE	A	3	1	0	0	60	3	393	326	-86	-2457	[380,313,408,341]	214.8	1.047	0.8894	1496	4	1	4413	3992	10726	1687	692844	4	3
Male	Control	TRUE	A	3	1	0	0	60	4	236	794	-179	-2735	[222,781,252,808]	237	1.001	0.837	1489	6	1	4660	4404	8691	2325	643122	6	4
Male	Control	TRUE	A	3	1	0	0	61	1	758	173	775	-2367	[744,159,773,191]	254.5	1.002	0.8157	2549	2	1	7586	7795	12774	2779	1524860	2	1
Male	Control	TRUE	A	3	1	0	0	61	2	469	383	605	-2491	[457,371,485,396]	196.9	0.9952	0.7901	1435	3	1	4423	4122	8850	1846	597053	3	2
Male	Control	TRUE	A	3	1	0	0	61	3	66	527	365	-2576	[51,511,81,542]	265.1	0.9988	0.8967	1575	4	1	5808	5894	9624	2371	847909	4	3
Male	Control	TRUE	A	3	1	0	0	61	4	137	559	407	-2596	[124,550,149,574]	150.1	0.9332	0.5497	2461	5	1	8484	8236	15315	3456	814439	5	4
Male	Control	TRUE	A	3	1	0	0	61	5	463	736	599	-2700	[440,721,481,751]	360.4	0.9324	0.686	1772	6	1	6835	6823	13050	2455	1448920	6	5
Male	Control	TRUE	A	4	1	0	0	1	1	833	91	172	263	[814,76,843,115]	240.5	0.7832	0.447	3055	1	1	6760	6833	11902	2624	1892832	1	1
Male	Control	TRUE	A	4	1	0	0	2	1	114	116	-897	2834	[99,104,130,132]	215.9	0.9478	0.6964	3172	1	1	6670	6109	13862	2282	1614110	1	1
Male	Control	TRUE	A	4	1	0	0	2	2	907	289	-427	2730	[896,278,927,308]	196.2	0.8023	0.5153	2886	2	1	7851	7880	13653	3990	934246	2	2
Male	Control	TRUE	A	4	1	0	0	4	1	147	419	414	2653	[137,409,161,434]	161	0.926	0.6024	3346	1	1	8372	8304	16592	3623	1297720	1	1
Male	Control	TRUE	A	4	1	0	0	4	2	575	933	668	2349	[562,919,591,948]	245.7	0.9683	0.8145	1441	2	1	4329	3984	10232	2010	722919	2	2
Male	Control	TRUE	A	4	1	0	0	4	3	662	1021	718	2297	[651,1010,673,1033]	157.9	0.9782	0.8237	2227	3	1	6011	5549	11461	3187	751389	3	3
Male	Control	TRUE	A	4	1	0	0	7	1	460	208	599	2135	[448,190,474,218]	174.7	0.8595	0.5285	3634	1	1	10665	9643	21298	5552	1215763	1	1
Male	Control	TRUE	A	4	1	0	0	10	1	12	117	-1604	2187	[3,108,22,129]	124.1	0.9616	0.732	2000	1	1	5278	4896	9863	3023	533081	1	1
Male	Control	TRUE	A	4	1	0	0	11	1	886	194	-1731	2142	[873,184,901,204]	145.6	0.9823	0.5961	2514	1	1	7396	6529	14200	2951	835720	1	1
Male	Control	TRUE	A	4	1	0	0	11	2	601	945	-1898	1695	[589,932,627,958]	239.1	0.8591	0.5428	1102	5	1	4466	4046	8731	2086	495714	5	2
Male	Control	TRUE	A	4	1	0	0	12	1	526	171	-1945	1508	[517,162,536,185]	134.3	0.9709	0.7573	2482	1	1	6860	6174	12945	3654	644871	1	1
Male	Control	TRUE	A	4	1	0	0	12	2	1021	386	-1651	1382	[1002,373,1043,401]	283	0.9267	0.5241	879	2	1	2948	2975	5555	1242	465713	2	2
Male	Control	TRUE	A	4	1	0	0	13	1	264	215	-1457	1483	[246,202,275,231]	220.8	0.9471	0.6368	2548	1	1	10719	10190	19413	4235	1179140	1	1
Male	Control	TRUE	A	4	1	0	0	13	2	184	789	-1500	1143	[174,779,203,800]	185.6	0.9047	0.6404	2587	2	1	8705	8746	14467	3008	1131640	2	2
Male	Control	TRUE	A	4	1	0	0	14	1	249	933	-819	1058	[231,923,265,944]	199	0.916	0.5185	1356	1	1	4218	4283	7822	1919	476624	1	1
Male	Control	TRUE	A	4	1	0	0	16	1	284	772	495	1155	[273,756,295,784]	175.8	0.9603	0.7	2159	1	1	8915	8505	15663	3441	802348	1	1
Male	Control	TRUE	A	4	1	0	0	18	1	900	1059	2151	983	[891,1049,910,1072]	132.9	0.9648	0.7845	1274	1	1	1951	1882	3598	942	390147	1	1
Male	Control	TRUE	A	4	1	0	0	23	1	327	297	-126	790	[312,278,341,311]	247.2	0.8986	0.6051	3247	1	1	9541	8864	18502	3284	1975080	1	1
Male	Control	TRUE	A	4	1	0	0	23	2	737	431	118	708	[724,418,751,450]	263.7	0.9828	0.7757	1754	3	1	7651	7221	13845	3185	879896	3	2
Male	Control	TRUE	A	4	1	0	0	23	3	849	806	185	488	[838,795,864,818]	188.8	0.9561	0.7885	2051	4	1	5420	4922	10779	2274	878036	4	3
Male	Control	TRUE	A	4	1	0	0	26	1	609	425	-1898	712	[586,411,625,443]	284.8	0.8976	0.5356	1894	2	1	3971	3968	6047	1460	1108027	1	1
Male	Control	TRUE	A	4	1	0	0	27	1	423	399	-2650	729	[411,389,443,409]	197.2	0.9381	0.5851	2626	2	1	7993	7896	15001	2825	1222860	2	1
Male	Control	TRUE	A	4	1	0	0	27	2	598	496	-2549	672	[586,486,609,506]	136.8	1	0.8082	2401	3	1	6158	5889	11528	2624	695826	3	2
Male	Control	TRUE	A	4	1	0	0	28	1	1023	208	-2297	197	[1008,194,1038,224]	235.6	0.9839	0.6518	1424	1	1	7439	7478	12549	2968	654590	1	1
Male	Control	TRUE	A	4	1	0	0	29	1	621	567	-1887	-18	[603,557,650,583]	262.3	0.8068	0.367	1935	1	1	7204	7335	14457	2817	1080654	1	1
Male	Control	TRUE	A	4	1	0	0	30	1	278	1029	-1446	-290	[264,1015,294,1043]	237.7	1.003	0.8574	1601	2	1	4849	4381	9950	2721	698219	2	1
Male	Control	TRUE	A	4	1	0	0	31	1	130	696	-888	-95	[122,688,139,714]	146.6	0.9359	0.6043	3178	1	1	10148	9483	17868	4428	1075720	1	1
Male	Control	TRUE	A	4	1	0	0	34	1	898	207	2151	197	[888,197,911,217]	134.3	1.008	0.7938	2991	1	1	7868	6526	17555	3415	936269	1	1
Male	Control	TRUE	A	4	1	0	0	34	2	756	326	2065	123	[742,314,767,352]	232.7	0.867	0.4247	1995	2	1	5665	5697	10681	2207	1059310	2	2
Male	Control	TRUE	A	4	1	0	0	34	3	995	966	2208	-253	[984,955,1009,978]	170.2	0.989	0.8893	1743	3	1	5934	5546	11078	2593	605288	3	3
Male	Control	TRUE	A	4	1	0	0	35	1	783	878	2727	-201	[768,864,797,894]	215.2	0.9876	0.6118	1871	1	1	6825	7024	11599	2515	887267	1	1
Male	Control	TRUE	A	4	1	0	0	35	2	524	1046	2575	-301	[511,1033,538,1060]	205	1.004	0.8698	1451	4	1	5810	5355	11186	2305	633274	4	2
Male	Control	TRUE	A	4	1	0	0	36	1	797	555	2737	-655	[787,545,810,566]	141.7	0.9843	0.8389	3306	1	1	6667	6301	12242	2794	1173452	1	1
Male	Control	TRUE	A	4	1	0	0	37	1	398	732	1854	-759	[386,718,410,744]	185.6	0.9612	0.8088	2171	2	1	8563	8557	14123	3511	890501	2	1
Male	Control	TRUE	A	4	1	0	0	38	1	435	56	1230	-359	[424,45,447,67]	149.4	0.9978	0.854	2159	2	1	4887	4693	7203	2788	591326	2	1
Male	Control	TRUE	A	4	1	0	0	38	2	847	729	1475	-758	[832,717,869,741]	239.4	0.8931	0.5244	1965	3	1	8104	8543	12906	3021	1004850	3	2
Male	Control	TRUE	A	4	1	0	0	41	1	570	149	-628	-415	[559,137,582,164]	164.9	0.987	0.6908	2155	3	1	6481	6684	9437	3851	622168	3	1
Male	Control	TRUE	A	4	1	0	0	41	2	928	221	-415	-457	[918,211,938,231]	111.4	1.018	0.7663	1330	4	1	2954	2834	5158	1309	336719	4	2
Male	Control	TRUE	A	4	1	0	0	44	1	1020	435	-2298	-584	[1010,423,1030,447]	141.7	0.9843	0.7547	2613	2	1	5561	4792	12502	2391	878567	1	1
Male	Control	TRUE	A	4	1	0	0	48	1	677	160	83	-1067	[668,151,693,170]	152.2	0.9253	0.6726	2671	1	1	9118	8320	19451	3932	866165	1	1
Male	Control	TRUE	A	4	1	0	0	48	2	235	583	-180	-1319	[222,570,251,600]	239.8	0.9673	0.726	1672	2	1	7647	7259	14253	3824	757034	2	2
Male	Control	TRUE	A	4	1	0	0	48	3	309	720	-135	-1398	[297,708,327,732]	186.7	0.9078	0.6025	3100	4	1	9842	9911	15521	3853	1368020	4	3
Male	Control	TRUE	A	4	1	0	0	50	1	766	852	1426	-1477	[755,841,776,863]	136.1	0.9433	0.7729	1773	1	1	3951	3921	6152	2188	387227	1	1
Male	Control	TRUE	A	4	1	0	0	53	1	332	156	1169	-1712	[322,145,343,175]	169.1	0.9235	0.5843	2220	2	1	7627	7680	13259	2913	846550	2	1
Male	Control	TRUE	A	4	1	0	0	53	2	760	884	1420	-2142	[741,869,772,899]	228.5	0.9153	0.5135	1480	3	1	5658	5199	12205	2479	667595	3	2
Male	Control	TRUE	A	4	1	0	0	53	3	1018	250	1575	-1766	[1004,236,1032,265]	239.8	1.008	0.8443	1863	4	1	7176	6611	13229	3788	825230	4	3
Male	Control	TRUE	A	4	1	0	0	54	1	298	215	504	-1747	[286,202,314,236]	235.6	0.9444	0.6325	3455	2	1	11959	12154	22860	4925	1817840	1	1
Male	Control	TRUE	A	4	1	0	0	55	1	434	746	-61	-2064	[424,736,457,767]	213.1	0.727	0.5173	1988	2	1	7017	6821	11518	3155	708738	2	1
Male	Control	TRUE	A	4	1	0	0	56	1	274	599	-803	-1973	[263,588,286,611]	138.2	1.006	0.7748	2601	2	1	6950	6891	12312	3272	750634	2	1
Male	Control	TRUE	A	4	1	0	0	59	1	233	458	-827	-2536	[223,448,247,469]	142.4	0.9695	0.7066	2983	1	1	9246	8867	17799	4525	961535	1	1
Male	Control	TRUE	A	5	1	0	0	1	1	594	68	32	279	[581,56,606,82]	193.4	0.9552	0.7511	1765	2	1	6284	6123	12386	2861	678643	1	1
Male	Control	TRUE	A	5	1	0	0	1	2	684	165	86	222	[675,154,694,177]	138.9	0.9381	0.7333	1847	3	1	5183	4977	9457	2455	487170	2	2
Male	Control	TRUE	A	5	1	0	0	1	3	225	365	-186	103	[211,347,241,380]	279.9	0.8884	0.6771	3336	6	1	7065	6907	14402	2803	2394980	5	3
Male	Control	TRUE	A	5	1	0	0	1	4	28	409	-304	77	[12,395,39,422]	185.3	0.9455	0.618	2274	7	1	5700	5326	10823	3135	803666	6	4
Male	Control	TRUE	A	5	1	0	0	1	5	186	526	-207	7	[174,516,205,538]	189.8	0.917	0.6058	2467	10	1	4218	4078	7170	2349	1029310	9	5
Male	Control	TRUE	A	5	1	0	0	1	6	164	545	-222	-7	[153,534,177,569]	222.2	0.9001	0.5276	2947	11	1	8784	9020	14702	3772	1264870	10	6
Male	Control	TRUE	A	5	1	0	0	1	7	173	628	-217	-53	[162,617,186,640]	159.6	0.9847	0.8424	3018	14	1	6733	7310	10209	2542	1137850	13	7
Male	Control	TRUE	A	5	1	0	0	1	8	63	687	-283	-88	[52,672,74,701]	170.2	0.9728	0.6902	2067	15	1	6516	6401	11043	2528	801454	14	8
Male	Control	TRUE	A	5	1	0	0	1	9	288	752	-147	-123	[278,731,303,762]	201.1	0.8365	0.5252	2284	17	1	5469	5122	9400	4600	546924	16	9
Male	Control	TRUE	A	5	1	0	0	1	10	448	810	-54	-161	[438,798,458,823]	148.4	0.9591	0.659	3140	18	1	6561	6677	11995	2766	1089080	17	10
Male	Control	TRUE	A	5	1	0	0	1	11	578	837	23	-175	[568,822,591,847]	147.3	0.9071	0.5947	1806	19	1	5954	5630	11380	3092	523969	18	11
Male	Control	TRUE	A	5	1	0	0	1	12	799	870	154	-196	[788,860,810,881]	136.4	0.98	0.7529	2700	20	1	8081	7695	15449	3275	864691	19	12
Male	Control	TRUE	A	5	1	0	0	1	13	416	1005	-73	-278	[407,993,426,1024]	169.5	0.8963	0.5292	1767	21	1	4639	4805	7176	1889	644850	20	13
Male	Control	TRUE	A	5	1	0	0	1	14	93	845	-264	-181	[81,832,109,858]	192	0.9805	0.7649	2655	25	1	7514	7318	13104	3111	1172130	24	14
Male	Control	TRUE	A	5	1	0	0	2	1	118	27	-895	2887	[107,13,132,39]	150.8	0.9049	0.5027	2726	1	1	9116	8780	15943	3189	993636	1	1
Male	Control	TRUE	A	5	1	0	0	2	2	891	86	-437	2852	[880,76,904,98]	160.3	0.9545	0.7854	1763	3	1	5063	4551	8745	2851	450607	3	2
Male	Control	TRUE	A	5	1	0	0	2	3	803	137	-484	2821	[793,126,833,148]	255.2	0.8214	0.495	1754	4	1	4399	4444	7476	1786	1029250	4	3
Male	Control	TRUE	A	5	1	0	0	2	4	545	164	-642	2806	[535,154,558,175]	142.4	1.005	0.8412	3049	6	1	6365	6397	11100	2549	1075700	6	4
Male	Control	TRUE	A	5	1	0	0	2	5	646	169	-583	2802	[635,158,656,180]	136.1	0.9433	0.7682	2528	7	1	5347	5303	9236	2525	828825	7	5
Male	Control	TRUE	A	5	1	0	0	2	6	59	214	-931	2777	[48,192,71,235]	287.9	0.8727	0.4844	1750	8	1	7407	7826	12141	2586	1155500	8	6
Male	Control	TRUE	A	5	1	0	0	2	7	850	263	-462	2748	[838,248,862,277]	198.3	0.9695	0.743	1688	10	1	4575	4703	7837	1909	741207	10	7
Male	Control	TRUE	A	5	1	0	0	2	8	721	340	-537	2701	[708,330,736,353]	170.9	0.9007	0.6472	2358	12	1	7592	7920	12766	2888	911025	12	8
Male	Control	TRUE	A	5	1	0	0	2	9	434	355	-708	2690	[426,345,443,376]	130.1	0.7739	0.4915	3512	13	1	8157	7993	13982	4100	978891	13	9
Male	Control	TRUE	A	5	1	0	0	2	10	78	385	-919	2674	[68,374,90,398]	143.4	0.9565	0.6325	1706	14	1	4761	4379	8939	2287	490388	14	10
Male	Control	TRUE	A	5	1	0	0	2	11	1066	494	-335	2604	[1055,487,1074,525]	176.8	0.7142	0.381	1049	18	1	2430	2329	4673	1262	393700	17	11
Male	Control	TRUE	A	5	1	0	0	2	12	903	552	-429	2576	[892,542,917,562]	153.3	0.9612	0.7504	2657	19	1	6708	6450	11247	2691	959186	18	12
Male	Control	TRUE	A	5	1	0	0	2	13	800	584	-491	2557	[789,573,812,596]	150.5	0.9843	0.8193	1425	20	1	3019	2886	4764	1877	265658	19	13
Male	Control	TRUE	A	5	1	0	0	2	14	286	622	-796	2535	[275,608,297,634]	177.5	0.9508	0.6973	2400	21	1	7133	6688	13488	2728	962888	20	14
Male	Control	TRUE	A	5	1	0	0	2	15	739	651	-525	2516	[724,642,763,664]	194.4	0.7481	0.4144	1639	22	1	3984	3668	6913	2502	693174	21	15
Male	Control	TRUE	A	5	1	0	0	2	16	643	655	-586	2514	[619,645,659,667]	223.2	0.8349	0.4139	1732	23	1	5563	5604	8292	3021	828913	22	16
Male	Control	TRUE	A	5	1	0	0	2	17	452	688	-698	2496	[433,672,468,698]	173.7	0.7442	0.4179	1973	25	1	5643	5557	8493	2544	790085	24	17
Male	Control	TRUE	A	5	1	0	0	2	18	484	741	-680	2464	[463,729,499,753]	199	0.7988	0.4911	1370	28	1	6097	5918	11308	2831	914503	27	19
Male	Control	TRUE	A	5	1	0	0	2	19	316	773	-777	2445	[305,763,333,783]	164.5	0.8943	0.6275	2180	32	1	5595	5536	11172	2024	867211	30	21
Male	Control	TRUE	A	5	1	0	0	2	20	607	950	-605	2341	[597,937,619,961]	143.4	0.8778	0.6717	1402	35	1	2899	2796	4999	2045	336317	32	22
Male	Control	TRUE	A	5	1	0	0	2	21	463	1044	-689	2284	[448,1034,485,1055]	211.6	0.8743	0.4984	1476	37	1	3986	4363	6805	1482	737375	34	23
Male	Control	TRUE	A	5	1	0	0	2	22	912	1057	-425	2276	[895,1048,928,1067]	187	0.8826	0.5415	1431	38	1	4317	4472	7436	1514	600131	35	24
Male	Control	TRUE	A	5	1	0	0	2	23	144	1064	-877	2272	[134,1055,165,1074]	184.6	0.9152	0.5699	1536	39	1	3437	3573	5858	1321	684034	36	25
Male	Control	TRUE	A	5	1	0	0	3	1	296	37	-144	2881	[285,26,308,49]	152.6	1.01	0.8258	1902	2	1	5195	4862	9877	2268	612952	1	1
Male	Control	TRUE	A	5	1	0	0	3	2	547	40	6	2879	[535,27,561,58]	222.9	0.9018	0.7081	2037	3	1	7408	7166	14172	2866	1044580	2	2
Male	Control	TRUE	A	5	1	0	0	3	3	775	56	140	2869	[765,46,786,69]	140.3	0.9965	0.8412	1291	4	1	3709	3564	6187	2119	370854	3	3
Male	Control	TRUE	A	5	1	0	0	3	4	501	59	-23	2867	[491,48,512,76]	164.9	0.9242	0.613	2205	5	1	6923	6831	11491	2598	858512	4	4
Male	Control	TRUE	A	5	1	0	0	3	5	298	82	-144	2854	[281,70,313,95]	229.6	0.9057	0.6255	2148	6	1	4633	4769	8464	1599	1241540	5	5
Male	Control	TRUE	A	5	1	0	0	3	6	565	100	15	2843	[553,90,580,111]	149.8	0.9319	0.6908	1010	7	1	2293	2044	3790	1412	293544	6	6
Male	Control	TRUE	A	5	1	0	0	3	7	27	133	-303	2824	[18,123,39,143]	122.7	0.9369	0.773	2450	8	1	5234	5148	8113	3026	643794	7	7
Male	Control	TRUE	A	5	1	0	0	3	8	743	153	121	2811	[733,131,754,178]	255.9	0.7686	0.3909	2047	9	1	6895	7172	11424	2337	1275550	8	8
Male	Control	TRUE	A	5	1	0	0	3	9	626	147	51	2815	[614,137,639,159]	144.1	0.9944	0.7028	3463	10	1	6766	6708	12104	2738	723942	9	9
Male	Control	TRUE	A	5	1	0	0	3	10	347	199	-113	2784	[337,189,365,215]	175.4	0.8019	0.6046	1507	12	1	4034	4101	6093	2505	451851	10	10
Male	Control	TRUE	A	5	1	0	0	3	11	1052	253	304	2750	[1043,242,1062,274]	191.6	0.9086	0.5491	2154	13	1	7112	7263	12400	2656	960101	11	11
Male	Control	TRUE	A	5	1	0	0	3	12	443	325	-56	2711	[432,312,459,338]	173	0.9216	0.5726	2156	15	1	6119	6115	10420	2286	832149	13	12
Male	Control	TRUE	A	5	1	0	0	3	13	692	349	91	2696	[682,339,704,361]	135	0.9562	0.6672	2487	16	1	5434	5276	10383	3011	597695	14	13
Male	Control	TRUE	A	5	1	0	0	3	14	90	352	-267	2694	[78,342,100,362]	133.9	0.9345	0.7626	2884	17	1	5038	5223	7884	2391	901817	15	14
Male	Control	TRUE	A	5	1	0	0	3	15	478	360	-37	2689	[464,352,488,371]	128	0.8047	0.5172	2222	18	1	6796	6523	12101	3385	584456	16	15
Male	Control	TRUE	A	5	1	0	0	3	16	578	404	23	2664	[565,391,591,417]	188.8	0.9709	0.718	2081	20	1	5731	6048	9425	2383	916966	18	16
Male	Control	TRUE	A	5	1	0	0	3	17	93	474	-263	2622	[83,466,106,485]	114.6	0.9343	0.6952	2253	22	1	6745	6305	11385	3775	863396	20	17
Male	Control	TRUE	A	5	1	0	0	3	18	497	513	-25	2597	[490,501,508,530]	104.8	0.7884	0.3079	1453	24	1	2241	2106	3706	1476	282425	22	18
Male	Control	TRUE	A	5	1	0	0	3	19	248	595	-172	2550	[237,586,261,606]	135	0.9389	0.6391	2983	27	1	7221	6352	12489	3542	837623	25	19
Male	Control	TRUE	A	5	1	0	0	3	20	1030	767	290	2446	[1019,754,1040,785]	163.8	0.8782	0.5327	2549	30	1	5229	5596	8622	2137	899342	28	20
Male	Control	TRUE	A	5	1	0	0	3	21	645	867	63	2388	[634,856,656,883]	162.4	0.9462	0.7254	1685	33	1	3368	3452	6193	1767	377264	31	21
Male	Control	TRUE	A	5	1	0	0	3	22	1053	891	306	2375	[1042,879,1070,903]	194.8	0.945	0.7405	1451	35	1	4778	4394	7893	2806	472976	33	22
Male	Control	TRUE	A	5	1	0	0	3	23	312	897	-136	2370	[297,887,322,910]	149.1	0.9618	0.6146	2071	37	1	4853	4875	8331	2068	713390	35	23
Male	Control	TRUE	A	5	1	0	0	3	24	243	958	-176	2335	[230,943,257,973]	225	0.9851	0.7878	1918	39	1	7092	6890	11505	2617	971658	36	24
Male	Control	TRUE	A	5	1	0	0	4	1	903	22	862	2890	[890,8,918,36]	226.8	0.936	0.7895	1380	1	1	3969	3643	7617	1748	654875	1	1
Male	Control	TRUE	A	5	1	0	0	4	2	407	85	565	2854	[390,62,418,96]	172.6	0.677	0.4336	977.5	2	1	2077	2187	3165	1109	297053	2	2
Male	Control	TRUE	A	5	1	0	0	4	3	1026	111	934	2835	[1013,101,1036,128]	167	0.9464	0.6667	2389	3	1	6522	5913	13144	2639	919647	3	3
Male	Control	TRUE	A	5	1	0	0	4	4	913	233	868	2765	[900,221,929,246]	205	0.9597	0.6273	1712	4	1	7394	6661	13751	3268	680258	4	4
Male	Control	TRUE	A	5	1	0	0	4	5	476	268	609	2743	[465,253,488,287]	220.1	0.9072	0.5796	3374	5	1	8003	8184	14868	3082	1872710	5	5
Male	Control	TRUE	A	5	1	0	0	4	6	591	270	677	2743	[581,259,602,280]	131.5	0.9241	0.7247	2983	6	1	6803	6826	12452	2433	965965	6	6
Male	Control	TRUE	A	5	1	0	0	4	7	907	286	864	2734	[892,272,921,300]	234.5	0.9679	0.7877	1511	7	1	4779	4585	8400	2102	707280	7	7
Male	Control	TRUE	A	5	1	0	0	4	8	1043	288	944	2730	[1035,275,1050,306]	135	0.8602	0.4524	2183	8	1	5709	5561	10723	2127	702179	8	8
Male	Control	TRUE	A	5	1	0	0	4	9	1034	312	939	2718	[1023,299,1046,325]	151.9	0.9559	0.6704	1076	9	1	3420	3283	6224	1593	294149	9	9
Male	Control	TRUE	A	5	1	0	0	4	10	667	519	722	2596	[652,504,680,532]	192	0.8472	0.5932	3734	11	1	12528	13098	24616	4193	1778990	10	10
Male	Control	TRUE	A	5	1	0	0	4	11	1025	523	933	2591	[1009,509,1040,546]	217.6	0.8017	0.3635	2314	12	1	6546	6877	9907	3030	942589	11	11
Male	Control	TRUE	A	5	1	0	0	4	12	974	526	903	2589	[960,512,985,548]	252.8	0.9223	0.5877	1969	13	1	5802	6033	9852	2052	1154550	12	12
Male	Control	TRUE	A	5	1	0	0	4	13	461	531	599	2588	[448,518,475,546]	233.8	0.9662	0.8944	1765	14	1	5581	5346	10502	2299	870561	13	13
Male	Control	TRUE	A	5	1	0	0	4	14	510	628	629	2531	[499,616,523,639]	149.1	0.9618	0.6983	2181	16	1	4480	4307	7779	1722	784017	15	14
Male	Control	TRUE	A	5	1	0	0	4	15	295	721	501	2475	[284,711,305,734]	135	0.9923	0.7396	1944	20	1	3686	3621	5970	1503	626598	19	15
Male	Control	TRUE	A	5	1	0	0	4	16	492	780	617	2440	[480,770,502,791]	129.4	0.8987	0.6063	1804	21	1	3519	3323	6628	1815	541995	20	16
Male	Control	TRUE	A	5	1	0	0	4	17	768	806	781	2424	[757,795,778,820]	141	0.9995	0.6933	2698	22	1	5899	5446	10515	3453	755030	21	17
Male	Control	TRUE	A	5	1	0	0	4	18	148	826	414	2412	[135,810,160,848]	234.1	0.8701	0.466	2667	23	1	6823	7283	10423	2303	1555530	22	18
Male	Control	TRUE	A	5	1	0	0	4	19	834	890	820	2373	[825,881,844,910]	173.3	0.8947	0.5839	1949	24	1	3026	3157	5283	1078	880424	23	19
Male	Control	TRUE	A	5	1	0	0	4	20	703	914	740	2362	[675,899,718,929]	310.4	0.8727	0.5873	1672	26	1	4053	4036	7188	1579	1207930	24	20
Male	Control	TRUE	A	5	1	0	0	4	21	40	924	350	2355	[30,911,50,937]	143.1	0.9223	0.5815	1383	27	1	2859	2967	4742	1686	337354	25	21
Male	Control	TRUE	A	5	1	0	0	4	22	1005	934	922	2349	[995,924,1016,946]	132.5	1	0.8027	1335	28	1	3456	2935	6396	2084	304126	26	22
Male	Control	TRUE	A	5	1	0	0	4	23	1040	959	943	2335	[1025,947,1055,971]	214.1	0.9848	0.7736	1548	29	1	4732	4332	9227	1988	747684	27	23
Male	Control	TRUE	A	5	1	0	0	4	24	62	976	363	2325	[41,965,83,988]	271.8	0.8731	0.5143	1799	31	1	5231	5837	7877	1997	1114250	29	24
Male	Control	TRUE	A	5	1	0	0	4	25	714	1063	750	2273	[701,1052,730,1076]	195.1	0.9321	0.6471	1406	35	1	4371	4581	6974	1674	624983	32	25
Male	Control	TRUE	A	5	1	0	0	5	1	886	88	2143	2204	[878,77,894,103]	112.5	0.8555	0.5199	3289	4	1	6235	6151	12237	2431	947770	2	1
Male	Control	TRUE	A	5	1	0	0	5	2	832	138	2115	2175	[822,129,855,150]	183.9	0.8253	0.5448	2974	6	1	6457	6760	10106	2474	1349440	4	2
Male	Control	TRUE	A	5	1	0	0	5	3	499	156	1914	2164	[487,145,511,169]	163.1	0.9645	0.768	3271	8	1	7394	7875	13145	2587	1353160	6	3
Male	Control	TRUE	A	5	1	0	0	5	4	1047	158	2238	2163	[1033,146,1057,172]	159.3	0.9507	0.5501	2274	9	1	5439	5709	8676	1924	892045	7	4
Male	Control	TRUE	A	5	1	0	0	5	5	136	162	1698	2160	[125,152,147,175]	132.5	0.9815	0.7712	2108	10	1	6604	6016	12674	2710	587796	8	5
Male	Control	TRUE	A	5	1	0	0	5	6	331	178	1813	2151	[319,167,342,192]	151.9	0.9726	0.6718	2903	11	1	9268	9002	15258	3503	1028750	9	6
Male	Control	TRUE	A	5	1	0	0	5	7	333	224	1816	2124	[322,212,347,238]	185.3	0.9455	0.6522	2528	12	1	8197	7806	13482	3738	991778	10	7
Male	Control	TRUE	A	5	1	0	0	5	8	357	334	1830	2056	[348,325,366,355]	155.4	0.9214	0.5657	2491	13	1	6539	6454	11454	2428	922057	11	8
Male	Control	TRUE	A	5	1	0	0	5	9	590	380	1967	2031	[573,364,605,401]	271.4	0.8523	0.4988	2307	15	1	7140	7570	12541	2471	1506470	13	9
Male	Control	TRUE	A	5	1	0	0	5	10	923	384	2165	2029	[908,375,936,394]	141	0.914	0.5787	3359	16	1	8895	8953	14379	3020	1209700	14	10
Male	Control	TRUE	A	5	1	0	0	5	11	320	517	1807	1950	[307,502,334,535]	244	0.9773	0.729	1306	18	1	3758	3777	7346	1552	695178	16	11
Male	Control	TRUE	A	5	1	0	0	5	12	741	515	2059	1952	[733,507,756,524]	117.8	0.9138	0.6325	2968	19	1	7468	7272	14695	2870	828941	17	12
Male	Control	TRUE	A	5	1	0	0	5	13	940	527	2175	1944	[930,517,951,540]	145.9	0.9495	0.809	2780	20	1	5806	5918	9598	2650	958029	18	13
Male	Control	TRUE	A	5	1	0	0	5	14	353	560	1828	1924	[342,549,367,574]	170.5	1.007	0.777	2080	22	1	5594	5172	9876	3100	738395	20	14
Male	Control	TRUE	A	5	1	0	0	5	15	197	579	1735	1914	[186,559,207,596]	207.8	0.8419	0.5011	1181	23	1	4230	3481	9408	2383	401883	21	15
Male	Control	TRUE	A	5	1	0	0	5	16	96	615	1675	1892	[83,604,112,627]	194.1	0.943	0.6883	2453	24	1	5953	6239	10396	2119	1166730	22	16
Male	Control	TRUE	A	5	1	0	0	5	17	1003	615	2213	1891	[991,603,1016,631]	195.5	0.976	0.7654	1768	25	1	5819	5442	11274	2432	750638	23	17
Male	Control	TRUE	A	5	1	0	0	5	18	706	683	2036	1852	[686,670,723,697]	265.8	0.9746	0.662	847.6	27	1	2468	2292	4825	1026	473779	25	18
Male	Control	TRUE	A	5	1	0	0	5	19	172	785	1719	1791	[158,775,184,799]	139.6	0.8779	0.4637	1243	28	1	2487	2278	4459	1335	363080	26	19
Male	Control	TRUE	A	5	1	0	0	5	20	775	907	2079	1720	[764,893,790,917]	165.2	0.7839	0.6038	2489	29	1	5582	5597	8376	3138	664275	27	20
Male	Control	TRUE	A	5	1	0	0	5	21	59	913	1653	1714	[47,898,71,935]	241.2	0.9086	0.5057	1396	30	1	4209	4386	7413	1574	749145	28	21
Male	Control	TRUE	A	5	1	0	0	5	22	705	949	2036	1692	[694,937,717,969]	213.8	0.9163	0.6821	1666	33	1	4367	4510	7166	2258	698740	30	22
Male	Control	TRUE	A	5	1	0	0	5	23	861	993	2132	1669	[850,983,887,1004]	208.5	0.8326	0.5126	1782	34	1	5307	5308	8382	2502	822623	31	23
Male	Control	TRUE	A	5	1	0	0	5	24	800	1007	2092	1660	[791,998,809,1018]	110.4	0.9907	0.8435	1876	35	1	3740	3438	6763	2312	452534	32	24
Male	Control	TRUE	A	5	1	0	0	5	25	1039	1037	2233	1644	[1023,1016,1052,1055]	253.1	0.7635	0.5444	1804	36	1	4176	3978	7873	1769	1115000	33	25
Male	Control	TRUE	A	5	1	0	0	6	1	298	112	1148	2190	[289,101,310,127]	124.1	0.8606	0.5403	2563	3	1	7025	7339	10134	3936	1053810	2	1
Male	Control	TRUE	A	5	1	0	0	6	2	568	185	1309	2147	[556,173,582,199]	193.7	0.9281	0.7951	2458	5	1	7287	6891	13043	3550	983773	4	2
Male	Control	TRUE	A	5	1	0	0	6	3	497	310	1267	2073	[485,299,512,321]	150.5	1.039	0.7022	1762	6	1	3700	3449	6170	1515	614193	5	3
Male	Control	TRUE	A	5	1	0	0	6	4	764	395	1424	2023	[753,384,775,409]	166.6	0.9932	0.7842	1440	8	1	2376	2327	4547	1108	572584	7	4
Male	Control	TRUE	A	5	1	0	0	6	5	957	462	1541	1983	[947,451,972,473]	163.8	0.9511	0.7408	2550	9	1	7432	7568	14364	2661	1018170	8	5
Male	Control	TRUE	A	5	1	0	0	6	6	994	642	1561	1878	[976,619,1007,655]	234.9	0.7903	0.5952	2375	11	1	9447	9362	16012	3898	1010780	10	6
Male	Control	TRUE	A	5	1	0	0	6	7	808	649	1451	1872	[798,636,818,663]	151.9	0.9559	0.6553	3158	12	1	6860	6763	12391	2805	1179940	11	7
Male	Control	TRUE	A	5	1	0	0	6	8	611	648	1336	1873	[603,640,625,657]	117.1	0.9654	0.6749	2426	13	1	5989	5841	9498	3152	640817	12	8
Male	Control	TRUE	A	5	1	0	0	6	9	134	744	1050	1812	[119,735,143,769]	177.9	0.7867	0.4	615.7	15	1	2220	2175	3640	1182	259778	14	9
Male	Control	TRUE	A	5	1	0	0	6	10	1033	874	1588	1738	[1015,860,1063,895]	295.7	0.7254	0.3614	2322	17	1	8634	8847	13809	4325	802946	16	10
Male	Control	TRUE	A	5	1	0	0	6	11	579	896	1315	1725	[564,884,595,914]	228.5	0.9403	0.5454	1452	18	1	4974	4932	9401	1859	751118	17	11
Male	Control	TRUE	A	5	1	0	0	6	12	332	925	1170	1708	[323,916,346,935]	123.4	1.017	0.7647	1366	20	1	3646	3354	6743	1773	342756	19	12
Male	Control	TRUE	A	5	1	0	0	6	13	47	1045	1000	1636	[34,1031,63,1065]	257.7	0.9571	0.6067	2626	21	1	7000	7549	11025	2441	1694000	20	13
Male	Control	TRUE	A	5	1	0	0	7	1	93	151	382	2167	[85,143,104,161]	108.6	0.9225	0.7347	1791	1	1	4245	4241	5971	2941	394746	1	1
Male	Control	TRUE	A	5	1	0	0	7	2	619	172	695	2152	[607,159,639,195]	239.1	0.8486	0.5657	2338	2	1	7684	6986	15515	3346	1106540	2	2
Male	Control	TRUE	A	5	1	0	0	7	3	994	171	916	2156	[980,160,1010,182]	175.4	0.9441	0.6204	2325	3	1	4007	4068	6985	1558	1037690	3	3
Male	Control	TRUE	A	5	1	0	0	7	4	117	231	395	2118	[108,221,126,249]	148.7	0.9439	0.5908	4014	5	1	9607	9879	17934	3301	1489050	5	4
Male	Control	TRUE	A	5	1	0	0	7	5	959	315	895	2069	[949,305,970,332]	145.9	0.9837	0.6004	1724	7	1	5265	5189	9462	2396	552785	7	5
Male	Control	TRUE	A	5	1	0	0	7	6	979	611	906	1893	[967,600,990,629]	183.5	1.001	0.7034	1806	10	1	5016	4844	10139	2044	757405	10	6
Male	Control	TRUE	A	5	1	0	0	7	7	548	624	649	1883	[527,606,560,653]	316.4	0.7945	0.4399	1886	11	1	6198	6183	10912	2445	706519	11	7
Male	Control	TRUE	A	5	1	0	0	7	8	190	760	439	1806	[176,746,205,777]	249.3	1.017	0.8121	1592	12	1	4594	4615	8861	1859	882044	12	8
Male	Control	TRUE	A	5	1	0	0	7	9	744	757	768	1806	[732,746,760,777]	223.6	0.9411	0.6558	1117	13	1	3517	3580	5401	1709	495936	13	9
Male	Control	TRUE	A	5	1	0	0	7	10	992	814	914	1774	[982,804,1002,828]	152.6	0.9586	0.7685	2159	14	1	7101	6943	12890	2605	759774	14	10
Male	Control	TRUE	A	5	1	0	0	7	11	1047	832	945	1763	[1030,822,1060,843]	162.4	0.9014	0.5441	1802	15	1	4171	3883	7509	3046	496343	15	11
Male	Control	TRUE	A	5	1	0	0	7	12	693	975	737	1679	[681,962,706,991]	201.1	0.9776	0.7123	1804	16	1	5430	5520	9975	2005	852548	16	12
Male	Control	TRUE	A	5	1	0	0	7	13	177	1059	431	1629	[167,1043,190,1074]	175.1	0.8481	0.4358	3450	18	1	7334	6889	13022	3340	1232090	18	13
Male	Control	TRUE	A	5	1	0	0	8	1	136	93	-241	2200	[117,78,148,116]	239.1	0.7895	0.3885	1806	3	1	4325	4572	7046	1787	973232	2	1
Male	Control	TRUE	A	5	1	0	0	8	2	364	111	-103	2192	[353,99,379,123]	178.2	0.9239	0.6534	2608	4	1	7127	7460	12568	2507	1118860	3	2
Male	Control	TRUE	A	5	1	0	0	8	3	769	117	136	2187	[758,107,780,132]	155.4	0.8776	0.6518	3044	6	1	6630	6563	10675	3516	855237	5	3
Male	Control	TRUE	A	5	1	0	0	8	4	744	121	122	2185	[733,110,757,142]	195.5	0.8222	0.5607	1806	7	1	4446	4471	6709	1866	600185	6	4
Male	Control	TRUE	A	5	1	0	0	8	5	769	140	136	2175	[755,131,778,150]	111.1	0.8989	0.6408	1615	10	1	6630	6563	10675	3516	855237	8	5
Male	Control	TRUE	A	5	1	0	0	8	6	878	202	202	2137	[866,190,892,216]	196.2	0.9781	0.8077	1927	11	1	5192	5023	8306	2418	815110	9	6
Male	Control	TRUE	A	5	1	0	0	8	7	603	256	37	2106	[588,243,614,269]	177.5	0.9217	0.6208	2827	13	1	7180	7067	14996	2704	1220520	11	7
Male	Control	TRUE	A	5	1	0	0	8	8	475	329	-38	2061	[464,316,487,343]	181.8	0.9347	0.7589	2460	14	1	6650	6795	12826	2445	1057300	12	8
Male	Control	TRUE	A	5	1	0	0	8	9	71	350	-275	2049	[57,337,96,365]	285.5	0.8989	0.5874	1281	15	1	4250	4237	8715	1587	803296	13	9
Male	Control	TRUE	A	5	1	0	0	8	10	614	394	43	2020	[599,384,629,418]	227.5	0.8551	0.5147	1814	17	1	6716	6612	11660	3277	899923	15	10
Male	Control	TRUE	A	5	1	0	0	8	11	478	401	-36	2020	[468,386,488,414]	142.7	0.9537	0.5967	3116	18	1	6045	6287	9934	2120	1166710	16	11
Male	Control	TRUE	A	5	1	0	0	8	12	299	536	-142	1938	[286,523,314,553]	226.1	0.9343	0.6218	1733	21	1	3843	3806	7905	1494	930020	19	12
Male	Control	TRUE	A	5	1	0	0	8	13	846	551	182	1930	[835,540,857,565]	164.5	1.003	0.844	1541	22	1	3644	3475	6103	1688	517381	20	13
Male	Control	TRUE	A	5	1	0	0	8	14	542	561	2	1925	[527,548,559,573]	215.9	0.909	0.6035	1467	23	1	4112	4345	7798	1685	699068	21	14
Male	Control	TRUE	A	5	1	0	0	8	15	989	571	266	1917	[972,554,1009,595]	373	0.8033	0.5643	1196	24	1	5218	5071	10222	2577	683518	22	15
Male	Control	TRUE	A	5	1	0	0	8	16	327	575	-125	1916	[315,565,343,586]	161.7	0.9924	0.6516	1776	25	1	5495	4967	9715	2422	576962	23	16
Male	Control	TRUE	A	5	1	0	0	8	17	812	644	161	1878	[799,620,823,657]	234.9	0.8395	0.5278	1951	27	1	4856	5188	7675	2026	1058550	25	17
Male	Control	TRUE	A	5	1	0	0	8	18	855	643	187	1876	[847,632,865,654]	100.9	0.8815	0.5123	2272	28	1	4151	4310	6725	1510	568665	26	18
Male	Control	TRUE	A	5	1	0	0	8	19	877	644	200	1874	[865,633,889,658]	174.7	1.005	0.809	2157	29	1	3955	4168	6678	1736	937293	27	19
Male	Control	TRUE	A	5	1	0	0	8	20	286	943	-150	1698	[273,930,302,956]	213.4	0.9549	0.7206	1233	35	1	2997	2748	5715	1755	419602	33	20
Male	Control	TRUE	A	5	1	0	0	8	21	909	982	220	1675	[898,972,924,992]	144.5	0.9608	0.6799	1311	36	1	3997	3821	7471	1619	403673	34	21
Male	Control	TRUE	A	5	1	0	0	8	22	725	1000	111	1664	[715,990,740,1010]	145.6	1	0.7308	1760	37	1	2711	2658	3512	2355	360626	35	22
Male	Control	TRUE	A	5	1	0	0	8	23	282	1038	-153	1642	[269,1024,295,1051]	179	0.885	0.686	1441	39	1	2992	2956	5445	1281	604397	37	23
Male	Control	TRUE	A	5	1	0	0	9	1	92	256	-912	2103	[81,246,101,273]	152.9	0.9437	0.6617	4388	5	1	10436	10528	17765	4652	1408830	2	1
Male	Control	TRUE	A	5	1	0	0	9	2	114	300	-898	2079	[104,289,124,312]	138.9	0.955	0.7848	2900	7	1	9134	8821	15513	3273	977339	3	2
Male	Control	TRUE	A	5	1	0	0	9	3	268	316	-806	2071	[252,300,288,332]	317.5	1.003	0.8479	1710	8	1	4223	4337	7236	1846	1169700	4	3
Male	Control	TRUE	A	5	1	0	0	9	4	400	370	-729	2037	[384,357,414,386]	237	0.9739	0.7757	2207	10	1	3626	3866	6172	1282	1356090	6	4
Male	Control	TRUE	A	5	1	0	0	9	5	15	453	-957	1989	[2,440,27,465]	185.6	0.9465	0.7945	1218	11	1	2869	2798	5069	1156	513487	7	5
Male	Control	TRUE	A	5	1	0	0	9	6	914	464	-423	1980	[905,453,924,482]	147.7	0.8934	0.5216	2327	12	1	6010	5682	11450	2587	787371	8	6
Male	Control	TRUE	A	5	1	0	0	9	7	287	479	-795	1975	[276,458,301,493]	207.8	0.9136	0.4983	2341	13	1	10424	10712	19079	3889	1104970	9	7
Male	Control	TRUE	A	5	1	0	0	9	8	778	497	-504	1962	[767,486,797,508]	155.4	0.8	0.5928	2084	14	1	7308	7461	11903	3124	716188	10	8
Male	Control	TRUE	A	5	1	0	0	9	9	126	542	-889	1934	[114,530,146,562]	222.9	0.8782	0.4342	837.2	18	1	2679	2811	4049	1141	337608	14	9
Male	Control	TRUE	A	5	1	0	0	9	10	803	641	-490	1877	[790,620,814,656]	193	0.784	0.5313	2028	20	1	3973	3969	6255	2122	691323	16	10
Male	Control	TRUE	A	5	1	0	0	9	11	227	658	-833	1866	[210,647,238,671]	205.3	0.92	0.743	1754	21	1	7387	6642	16670	3000	746055	17	11
Male	Control	TRUE	A	5	1	0	0	9	12	706	695	-547	1845	[688,685,719,706]	173	0.8801	0.6184	2545	22	1	5478	5402	10343	3231	909383	18	12
Male	Control	TRUE	A	5	1	0	0	9	13	323	713	-774	1833	[312,700,334,732]	202.2	0.9247	0.5771	2440	23	1	6777	6609	11241	2666	1131800	19	13
Male	Control	TRUE	A	5	1	0	0	9	14	157	730	-871	1824	[146,720,172,741]	157.5	0.9769	0.7384	2393	25	1	6316	6517	11480	2343	896918	21	14
Male	Control	TRUE	A	5	1	0	0	9	15	971	779	-390	1794	[961,768,982,794]	161.4	0.9124	0.7384	1656	26	1	5687	5786	9570	2309	585783	22	15
Male	Control	TRUE	A	5	1	0	0	9	16	1000	917	-372	1713	[989,904,1013,931]	170.2	0.8585	0.5657	1055	28	1	4076	4141	6760	1558	370896	24	16
Male	Control	TRUE	A	5	1	0	0	9	17	467	1020	-688	1652	[457,1012,479,1029]	109.3	0.9646	0.7058	2368	29	1	4772	4576	8418	2951	520177	25	17
Male	Control	TRUE	A	5	1	0	0	9	18	839	760	-469	1807	[822,743,855,777]	333.3	0.962	0.7584	2344	33	1	8322	8216	13657	3861	1073570	27	18
Male	Control	TRUE	A	5	1	0	0	10	1	873	112	-1094	2192	[861,94,884,123]	181.1	0.9326	0.6866	2285	4	1	5341	4923	9478	2642	988077	3	1
Male	Control	TRUE	A	5	1	0	0	10	2	916	354	-1069	2047	[904,342,928,370]	189.8	0.9741	0.7324	1868	7	1	5102	4968	9714	2000	790809	6	2
Male	Control	TRUE	A	5	1	0	0	10	3	462	503	-1339	1959	[446,492,473,515]	173.3	0.9523	0.6212	2160	10	1	7428	7306	14135	2776	846735	9	4
Male	Control	TRUE	A	5	1	0	0	10	4	143	527	-1527	1945	[123,512,161,539]	224	0.8158	0.4281	2195	11	1	7129	6700	12677	3019	1083650	10	5
Male	Control	TRUE	A	5	1	0	0	10	5	756	525	-1162	1946	[745,514,771,537]	175.1	0.9735	0.8047	1967	12	1	6937	5962	14294	3598	672845	11	6
Male	Control	TRUE	A	5	1	0	0	10	6	275	536	-1446	1939	[264,524,298,548]	203.9	0.8435	0.4991	1658	13	1	4769	4641	10821	1765	772570	12	7
Male	Control	TRUE	A	5	1	0	0	10	7	840	544	-1113	1935	[821,532,862,556]	233.1	0.8155	0.4915	1883	14	1	5912	6524	9062	2069	1034680	13	8
Male	Control	TRUE	A	5	1	0	0	10	8	648	615	-1228	1893	[626,603,666,628]	230.3	0.8955	0.5206	2985	15	1	5821	5566	9672	3441	1309730	14	9
Male	Control	TRUE	A	5	1	0	0	10	9	887	613	-1084	1892	[877,603,903,627]	150.1	0.9829	0.5478	1088	16	1	2612	2372	4844	1199	339590	15	10
Male	Control	TRUE	A	5	1	0	0	10	10	170	752	-1510	1812	[157,730,188,773]	273.5	0.8274	0.4437	1419	18	1	4097	4365	6469	1518	889080	17	12
Male	Control	TRUE	A	5	1	0	0	10	11	268	912	-1452	1716	[258,901,279,926]	144.8	0.9622	0.6774	2161	21	1	7000	6219	15174	2880	713983	20	13
Male	Control	TRUE	A	5	1	0	0	10	12	485	926	-1325	1709	[472,910,496,939]	185.6	0.9612	0.6902	2080	22	1	4671	4546	7111	2443	639858	21	14
Male	Control	TRUE	A	5	1	0	0	10	13	658	979	-1221	1676	[646,968,670,995]	173	0.9986	0.7084	892.4	23	1	1792	1671	3287	1131	243729	22	15
Male	Control	TRUE	A	5	1	0	0	10	14	249	984	-1470	1672	[215,973,264,1002]	334.7	0.8472	0.4267	927	24	1	3073	3116	6437	1171	660611	23	16
Male	Control	TRUE	A	5	1	0	0	10	15	825	1001	-1122	1662	[816,991,835,1017]	145.9	0.9495	0.6945	1055	25	1	2355	2199	6706	999	327327	24	17
Male	Control	TRUE	A	5	1	0	0	11	1	1049	21	-1636	2245	[1037,9,1059,33]	142	0.968	0.618	1586	1	1	3663	3284	6416	2215	443183	1	1
Male	Control	TRUE	A	5	1	0	0	11	2	965	243	-1684	2112	[949,227,982,266]	279.5	0.9199	0.4965	1539	2	1	5704	5856	9954	3022	832718	2	2
Male	Control	TRUE	A	5	1	0	0	11	3	246	416	-2111	2011	[233,406,264,426]	158.6	0.8745	0.5442	3082	7	1	6473	6558	10588	2172	1223440	7	3
Male	Control	TRUE	A	5	1	0	0	11	4	707	437	-1838	1999	[696,420,718,449]	176.5	0.9327	0.6649	2263	8	1	5620	5428	11005	2171	949716	8	4
Male	Control	TRUE	A	5	1	0	0	11	5	938	444	-1701	1993	[928,434,948,457]	124.8	0.9648	0.6189	1204	10	1	2958	2847	5958	1472	286967	10	5
Male	Control	TRUE	A	5	1	0	0	11	6	266	467	-2100	1979	[256,457,276,481]	142	0.9857	0.7232	3400	11	1	6579	6701	11789	2375	1217030	11	6
Male	Control	TRUE	A	5	1	0	0	11	7	931	567	-1706	1918	[918,557,941,587]	187.4	0.9235	0.592	1052	12	1	3024	3100	4560	1215	426349	12	7
Male	Control	TRUE	A	5	1	0	0	11	8	794	602	-1786	1897	[785,592,804,624]	174	0.8574	0.4668	1214	13	1	3325	3415	5355	1384	475490	13	8
Male	Control	TRUE	A	5	1	0	0	11	9	181	614	-2151	1892	[159,599,199,636]	292.2	0.8904	0.3776	1722	14	1	6005	5972	12267	2705	1062960	14	9
Male	Control	TRUE	A	5	1	0	0	11	10	524	618	-1946	1889	[516,610,534,632]	120.2	0.9433	0.6351	2160	15	1	4315	4325	6240	2805	405623	15	10
Male	Control	TRUE	A	5	1	0	0	11	11	262	668	-2102	1861	[251,657,273,682]	155	1.02	0.7619	3430	17	1	7137	6863	11647	3887	956311	17	12
Male	Control	TRUE	A	5	1	0	0	11	12	727	673	-1826	1858	[714,662,743,689]	186.3	0.8806	0.5303	1870	18	1	5616	5579	8986	2396	735747	18	13
Male	Control	TRUE	A	5	1	0	0	11	13	712	695	-1835	1844	[702,686,722,709]	132.2	0.9441	0.7065	1004	19	1	2359	2353	3995	1142	257181	19	14
Male	Control	TRUE	A	5	1	0	0	11	14	895	710	-1727	1836	[882,696,907,724]	184.6	0.973	0.6667	1421	21	1	3603	3434	6636	2008	515226	21	15
Male	Control	TRUE	A	5	1	0	0	11	15	674	803	-1858	1781	[664,791,684,816]	137.8	0.9861	0.7149	2206	24	1	5505	4743	10805	3216	539493	24	16
Male	Control	TRUE	A	5	1	0	0	11	16	655	881	-1869	1733	[645,869,666,901]	185.6	0.9322	0.6113	1734	26	1	3508	3716	6104	1506	736700	26	17
Male	Control	TRUE	A	5	1	0	0	11	17	91	894	-2203	1729	[80,870,108,909]	250.3	0.7843	0.4435	985.8	27	1	3706	3011	7764	1940	441069	27	18
Male	Control	TRUE	A	5	1	0	0	11	18	104	945	-2196	1698	[89,923,117,960]	245.4	0.8836	0.5101	2348	28	1	6596	6600	11642	2338	1418050	28	19
Male	Control	TRUE	A	5	1	0	0	11	19	77	998	-2211	1664	[64,986,89,1014]	185.3	0.9037	0.6596	2098	29	1	5386	5174	10053	1887	958665	29	20
Male	Control	TRUE	A	5	1	0	0	11	20	850	1015	-1752	1655	[839,1000,867,1029]	190.2	0.9046	0.5024	730.3	30	1	2184	2139	4031	1034	242478	30	21
Male	Control	TRUE	A	5	1	0	0	11	21	630	1047	-1883	1636	[621,1038,641,1057]	107.2	0.9943	0.8	1596	31	1	3453	2904	7696	1943	338377	31	22
Male	Control	TRUE	A	5	1	0	0	11	22	317	1064	-2069	1626	[309,1056,328,1074]	105.1	0.9617	0.7749	2502	33	1	3520	3451	6495	1363	686387	33	23
Male	Control	TRUE	A	5	1	0	0	11	23	290	63	-2086	2220	[275,45,305,82]	271.8	0.9387	0.5613	3278	34	1	8613	8635	15427	3082	2170460	34	24
Male	Control	TRUE	A	5	1	0	0	11	24	648	963	-1873	1685	[634,946,663,985]	313.6	0.95	0.6585	1171	35	1	2056	2143	2885	1012	857182	35	25
Male	Control	TRUE	A	5	1	0	0	12	1	285	26	-2089	1593	[268,13,300,49]	296.4	0.919	0.6047	1595	1	1	4327	4738	6881	1602	1068860	1	1
Male	Control	TRUE	A	5	1	0	0	12	2	131	36	-2179	1589	[120,25,142,52]	171.9	0.9041	0.7067	2674	2	1	6959	7383	11566	2354	1155140	2	2
Male	Control	TRUE	A	5	1	0	0	12	3	604	52	-1898	1581	[594,42,618,63]	149.8	0.9645	0.7894	1747	3	1	4864	4494	9882	2173	544729	3	3
Male	Control	TRUE	A	5	1	0	0	12	4	366	62	-2040	1575	[356,52,379,73]	139.9	0.9769	0.7851	3395	6	1	8360	8529	15084	2857	1195440	6	4
Male	Control	TRUE	A	5	1	0	0	12	5	125	89	-2184	1558	[109,76,139,106]	226.8	0.936	0.5747	2008	7	1	8408	8760	14660	3301	992159	7	5
Male	Control	TRUE	A	5	1	0	0	12	6	462	92	-1984	1556	[449,81,472,105]	154	0.9638	0.7147	2077	8	1	4538	4751	6970	2266	630729	8	6
Male	Control	TRUE	A	5	1	0	0	12	7	61	138	-2221	1529	[49,127,73,149]	139.2	0.9921	0.7737	1702	10	1	2822	2820	4064	1403	510866	10	7
Male	Control	TRUE	A	5	1	0	0	12	8	449	195	-1991	1496	[437,182,464,208]	205.3	0.9071	0.7305	3471	11	1	6527	6813	10048	1825	1873260	11	8
Male	Control	TRUE	A	5	1	0	0	12	9	488	289	-1968	1440	[478,279,500,302]	155	0.9678	0.8138	2034	13	1	3278	3465	5022	1473	780206	13	10
Male	Control	TRUE	A	5	1	0	0	12	10	179	445	-2149	1348	[167,434,198,455]	187	0.9225	0.629	1455	15	1	3203	3223	5443	1459	582909	15	11
Male	Control	TRUE	A	5	1	0	0	12	11	1019	508	-1650	1310	[1002,496,1046,521]	296.4	0.8878	0.5385	1385	16	1	3454	3216	6818	1611	901363	16	12
Male	Control	TRUE	A	5	1	0	0	12	12	427	575	-2003	1269	[415,563,443,592]	215.9	0.9217	0.5481	2013	17	1	6188	6028	9996	2597	952875	17	13
Male	Control	TRUE	A	5	1	0	0	12	13	668	581	-1860	1268	[651,563,687,597]	315.7	0.9763	0.7726	3184	18	1	10987	10928	20740	4481	2241400	18	14
Male	Control	TRUE	A	5	1	0	0	12	14	157	621	-2164	1242	[147,606,168,641]	225.4	0.884	0.5598	1980	19	1	6476	6309	14651	2466	1010310	19	15
Male	Control	TRUE	A	5	1	0	0	12	15	195	628	-2142	1238	[182,617,206,644]	182.8	0.9829	0.747	2602	20	1	6200	6348	9409	3597	1047840	20	16
Male	Control	TRUE	A	5	1	0	0	12	16	598	687	-1903	1204	[585,676,610,698]	163.8	0.9511	0.7822	1120	22	1	3217	2995	6038	1367	386010	22	17
Male	Control	TRUE	A	5	1	0	0	12	17	108	767	-2194	1156	[94,752,120,780]	183.9	0.9131	0.7252	2343	25	1	5876	5444	13065	2347	1028230	25	18
Male	Control	TRUE	A	5	1	0	0	12	18	1006	771	-1661	1154	[991,759,1019,784]	200	0.8931	0.6062	1475	26	1	4016	4257	6363	1893	646619	26	19
Male	Control	TRUE	A	5	1	0	0	12	19	699	882	-1843	1088	[689,869,709,895]	146.6	0.9359	0.6903	1678	28	1	5029	4828	8795	2358	522977	28	20
Male	Control	TRUE	A	5	1	0	0	12	20	209	890	-2137	1082	[180,878,221,906]	283.4	0.9387	0.5261	936.2	29	1	3018	3146	4425	1723	416491	29	21
Male	Control	TRUE	A	5	1	0	0	12	21	637	929	-1879	1061	[619,917,656,941]	242.9	0.9882	0.6041	1392	30	1	7057	6728	11947	2844	656282	30	22
Male	Control	TRUE	A	5	1	0	0	12	22	610	1027	-1896	1000	[600,1019,618,1044]	136.4	0.928	0.5904	1140	32	1	3702	3603	6319	1453	340600	32	23
Male	Control	TRUE	A	5	1	0	0	13	1	270	35	-1452	1591	[260,20,282,46]	153.6	0.9151	0.6778	3328	1	1	6775	6207	13852	2814	1280550	1	1
Male	Control	TRUE	A	5	1	0	0	13	2	282	52	-1444	1579	[272,42,293,66]	144.5	0.944	0.774	1808	2	1	3617	3291	7512	1561	708978	2	2
Male	Control	TRUE	A	5	1	0	0	13	3	52	84	-1581	1560	[42,75,60,97]	115.7	0.9214	0.6053	3049	4	1	6337	6116	10377	3274	811081	4	4
Male	Control	TRUE	A	5	1	0	0	13	4	290	183	-1440	1503	[278,172,301,197]	169.5	0.9704	0.7931	2837	7	1	8493	9054	16001	2929	1163510	7	6
Male	Control	TRUE	A	5	1	0	0	13	5	813	260	-1130	1458	[793,246,834,276]	283	0.8168	0.5304	2818	8	1	6199	5931	11533	3591	1047620	8	7
Male	Control	TRUE	A	5	1	0	0	13	6	335	323	-1413	1420	[324,313,346,332]	121.3	0.9669	0.6756	3185	9	1	8121	7952	13501	3163	933925	9	8
Male	Control	TRUE	A	5	1	0	0	13	7	252	339	-1462	1410	[241,328,268,352]	167.7	0.9644	0.7071	2898	10	1	8809	8344	16868	3982	1004190	10	9
Male	Control	TRUE	A	5	1	0	0	13	8	122	346	-1539	1405	[111,334,134,367]	203.9	0.9034	0.6047	2419	11	1	9448	9138	19250	3437	1124350	11	10
Male	Control	TRUE	A	5	1	0	0	13	9	970	457	-1037	1340	[953,445,987,470]	214.8	0.945	0.6125	3627	13	1	6984	6767	11208	3975	900983	13	11
Male	Control	TRUE	A	5	1	0	0	13	10	882	469	-1088	1334	[870,457,899,481]	182.1	0.9079	0.5343	1537	14	1	6187	5757	12307	2626	538274	14	12
Male	Control	TRUE	A	5	1	0	0	13	11	51	557	-1582	1281	[40,538,61,574]	160	0.7468	0.3817	1444	16	1	5490	5801	8502	2098	499610	15	13
Male	Control	TRUE	A	5	1	0	0	13	12	34	575	-1591	1269	[22,565,45,595]	174	0.8969	0.5879	2319	17	1	8169	7971	14633	2790	988418	16	14
Male	Control	TRUE	A	5	1	0	0	13	13	201	599	-1492	1256	[192,588,211,612]	135.7	0.9251	0.7087	3039	18	1	9308	9823	15737	3303	977320	17	15
Male	Control	TRUE	A	5	1	0	0	13	14	400	602	-1374	1254	[390,591,413,615]	156.5	0.8674	0.6988	1814	19	1	4264	4453	6739	2018	648080	18	16
Male	Control	TRUE	A	5	1	0	0	13	15	1041	890	-994	1084	[1029,879,1053,901]	151.9	1.008	0.8376	3509	23	1	7447	7581	13130	2684	1370190	21	18
Male	Control	TRUE	A	5	1	0	0	13	16	927	913	-1062	1072	[912,889,942,932]	354.4	0.904	0.6132	1452	24	1	5374	5500	9065	2009	1123230	22	19
Male	Control	TRUE	A	5	1	0	0	13	17	682	964	-1206	1040	[670,949,698,977]	210.2	0.9602	0.6854	2051	27	1	5235	5621	10273	1822	1057370	25	20
Male	Control	TRUE	A	5	1	0	0	13	18	103	969	-1549	1037	[92,958,119,980]	168.4	0.8531	0.5732	1805	28	1	6028	6476	9501	2214	687142	26	21
Male	Control	TRUE	A	5	1	0	0	13	19	989	979	-1025	1030	[978,968,999,991]	138.2	0.9876	0.6984	2099	29	1	5618	5518	10786	2097	685381	27	22
Male	Control	TRUE	A	5	1	0	0	13	20	799	281	-1139	1446	[777,264,812,295]	227.1	0.7305	0.5817	3766	31	1	8626	7930	16929	4438	1052420	29	23
Male	Control	TRUE	A	5	1	0	0	14	1	855	298	-458	1433	[841,285,871,316]	232.4	0.9497	0.588	1652	3	1	5760	5353	10232	2339	858232	2	1
Male	Control	TRUE	A	5	1	0	0	14	2	656	433	-577	1354	[647,422,666,442]	105.1	0.9617	0.7347	2771	5	1	7277	7440	10954	2880	698550	4	2
Male	Control	TRUE	A	5	1	0	0	14	3	537	495	-647	1316	[527,485,546,512]	151.2	0.8362	0.6266	2615	6	1	6901	7199	11350	2527	966117	5	3
Male	Control	TRUE	A	5	1	0	0	14	4	718	579	-539	1267	[702,567,734,592]	241.2	0.9577	0.7117	2230	7	1	6745	6573	13739	2668	1234300	6	4
Male	Control	TRUE	A	5	1	0	0	14	5	235	597	-826	1258	[223,584,250,609]	190.6	0.9614	0.6992	1825	8	1	6138	5911	10210	2705	705842	7	5
Male	Control	TRUE	A	5	1	0	0	14	6	33	611	-946	1250	[20,600,48,623]	171.6	0.9938	0.7235	1347	9	1	2905	2694	5343	1920	377670	8	6
Male	Control	TRUE	A	5	1	0	0	14	7	1013	785	-362	1145	[1006,779,1031,797]	110.4	0.7721	0.4316	1415	12	1	3435	3346	6516	1647	474081	11	7
Male	Control	TRUE	A	5	1	0	0	14	8	212	797	-840	1138	[197,782,225,812]	231	0.909	0.7496	2122	13	1	6571	6330	12114	3396	749104	12	8
Male	Control	TRUE	A	5	1	0	0	14	9	499	927	-669	1062	[490,918,512,937]	126.2	0.9352	0.6756	2175	15	1	4934	4987	9547	1894	670976	14	9
Male	Control	TRUE	A	5	1	0	0	15	1	939	51	237	1580	[922,40,957,62]	198.3	0.9011	0.5657	1714	2	1	5420	5624	9957	1979	780451	1	1
Male	Control	TRUE	A	5	1	0	0	15	2	206	138	-198	1529	[188,119,221,156]	320.6	0.8993	0.7198	2070	4	1	5762	5610	10219	2189	1509550	3	2
Male	Control	TRUE	A	5	1	0	0	15	3	212	162	-198	1515	[191,155,220,172]	137.5	0.8847	0.4851	2924	8	1	7895	6557	15723	4343	789458	7	3
Male	Control	TRUE	A	5	1	0	0	15	4	703	308	97	1428	[693,299,712,319]	106.2	0.9883	0.7822	2924	10	1	5226	5187	9115	2342	742066	9	4
Male	Control	TRUE	A	5	1	0	0	15	5	640	419	58	1360	[619,405,652,439]	255.9	0.8423	0.4844	1361	13	1	4821	4953	7633	2274	703848	12	5
Male	Control	TRUE	A	5	1	0	0	15	6	724	501	109	1316	[708,486,738,512]	167.3	0.8131	0.5234	3367	15	1	7126	7293	11796	3557	1161510	14	7
Male	Control	TRUE	A	5	1	0	0	15	7	1052	506	303	1308	[1032,491,1068,533]	348.4	0.743	0.4764	729.1	16	1	2749	2566	5002	1566	241869	15	8
Male	Control	TRUE	A	5	1	0	0	15	8	778	524	142	1299	[768,507,787,547]	210.6	0.8162	0.444	1876	17	1	6805	6587	12635	2666	870980	16	9
Male	Control	TRUE	A	5	1	0	0	15	9	749	523	125	1301	[738,512,763,534]	150.1	1.001	0.7726	1720	18	1	2769	2915	4164	1158	271346	17	10
Male	Control	TRUE	A	5	1	0	0	15	10	918	524	225	1301	[906,514,934,534]	144.1	0.8953	0.5254	1144	19	1	3152	2889	5356	1436	330937	18	11
Male	Control	TRUE	A	5	1	0	0	15	11	19	577	-309	1270	[8,566,29,588]	122	0.9703	0.5711	1132	20	1	3471	3220	7028	1433	298525	19	12
Male	Control	TRUE	A	5	1	0	0	15	12	255	590	-168	1261	[241,577,269,603]	208.8	0.9848	0.7648	3182	21	1	9766	9632	17369	3546	1611460	20	13
Male	Control	TRUE	A	5	1	0	0	15	13	18	657	-308	1221	[8,647,34,668]	152.2	1.027	0.7725	2535	22	1	6930	6922	12307	2500	935608	21	14
Male	Control	TRUE	A	5	1	0	0	15	14	36	705	-299	1193	[24,694,47,717]	148.7	0.9439	0.7401	1908	23	1	5832	6080	10179	2006	694042	22	15
Male	Control	TRUE	A	5	1	0	0	15	15	332	837	-124	1113	[318,825,343,858]	211.3	0.9358	0.5393	910	26	1	2693	2415	4910	1362	344700	24	16
Male	Control	TRUE	A	5	1	0	0	15	16	442	885	-56	1087	[428,870,464,900]	262.6	0.8867	0.5059	1005	27	1	3057	3003	5238	1219	547164	25	17
Male	Control	TRUE	A	5	1	0	0	15	17	915	910	222	1071	[903,898,926,925]	177.5	0.9361	0.6996	1083	28	1	2671	2593	4948	1687	365894	26	18
Male	Control	TRUE	A	5	1	0	0	15	18	825	923	170	1064	[815,912,843,934]	151.2	0.8914	0.5975	1288	29	1	2005	2031	3223	1001	475091	27	19
Male	Control	TRUE	A	5	1	0	0	15	19	513	990	-15	1024	[487,980,543,1002]	309	0.7379	0.3216	928.1	31	1	2992	3025	5765	1099	640270	29	20
Male	Control	TRUE	A	5	1	0	0	16	1	806	39	804	1586	[795,29,818,57]	175.8	0.9452	0.6341	1960	2	1	6446	6673	10955	2327	805697	1	1
Male	Control	TRUE	A	5	1	0	0	16	2	127	115	402	1543	[115,104,140,128]	154.7	0.9833	0.6418	1838	5	1	5482	6035	7705	2539	635874	4	2
Male	Control	TRUE	A	5	1	0	0	16	3	84	144	376	1523	[73,124,96,174]	315	0.8171	0.4155	984.1	6	1	2636	2593	4144	1425	619440	5	3
Male	Control	TRUE	A	5	1	0	0	16	4	774	227	784	1475	[762,215,787,247]	211.6	0.9109	0.6757	1716	7	1	4328	4064	8688	1977	809334	6	4
Male	Control	TRUE	A	5	1	0	0	16	5	1015	288	928	1440	[1003,276,1029,302]	180	0.9015	0.718	1606	10	1	4414	3933	9331	2687	498804	9	6
Male	Control	TRUE	A	5	1	0	0	16	6	972	291	902	1439	[962,280,981,301]	112.5	0.9238	0.686	2337	11	1	7065	6579	12307	2646	607601	10	7
Male	Control	TRUE	A	5	1	0	0	16	7	86	456	377	1337	[76,446,96,482]	207.8	0.8419	0.4938	1899	14	1	5848	5631	10253	2768	713396	13	8
Male	Control	TRUE	A	5	1	0	0	16	8	985	512	909	1307	[964,499,1001,528]	282	0.882	0.5828	2839	16	1	9090	9284	16222	3086	1963380	15	9
Male	Control	TRUE	A	5	1	0	0	16	9	745	539	768	1291	[733,521,759,561]	271.8	0.8834	0.4927	1368	18	1	4111	4004	8104	1613	818092	17	11
Male	Control	TRUE	A	5	1	0	0	16	10	290	586	498	1260	[281,577,300,609]	196.2	0.9215	0.5448	2747	19	1	8132	8808	13979	2754	1325440	18	12
Male	Control	TRUE	A	5	1	0	0	16	11	38	697	349	1198	[27,679,50,717]	222.5	0.889	0.5273	1865	20	1	6154	6148	10373	2431	935481	19	13
Male	Control	TRUE	A	5	1	0	0	16	12	334	703	525	1194	[323,689,350,720]	199.3	0.832	0.6481	906.6	21	1	2359	2193	4059	1165	323212	20	14
Male	Control	TRUE	A	5	1	0	0	16	13	373	793	549	1140	[361,781,395,810]	219.7	0.9715	0.528	1978	26	1	5994	5710	11633	1882	1048930	24	15
Male	Control	TRUE	A	5	1	0	0	16	14	428	902	579	1077	[414,891,439,913]	172.3	0.9488	0.6968	3319	30	1	5713	5813	11738	2155	1468140	28	17
Male	Control	TRUE	A	5	1	0	0	16	15	561	977	659	1031	[547,959,576,996]	218	0.7641	0.4026	1056	31	1	2815	2681	6106	1062	529296	29	18
Male	Control	TRUE	A	5	1	0	0	16	16	713	572	749	1273	[701,558,726,584]	187	0.9655	0.7207	2618	33	1	8908	9190	15292	3353	1131330	30	19
Male	Control	TRUE	A	5	1	0	0	17	1	1006	64	1567	1574	[982,52,1027,76]	277	0.8529	0.4425	1165	1	1	3237	3263	5513	1293	721798	1	1
Male	Control	TRUE	A	5	1	0	0	17	2	935	142	1525	1526	[920,132,949,157]	183.2	0.911	0.6212	1211	2	1	4177	4211	9309	1611	467785	2	2
Male	Control	TRUE	A	5	1	0	0	17	3	1016	177	1576	1505	[1005,165,1032,191]	175.4	0.9906	0.6027	1349	3	1	3686	3252	6799	2310	387028	3	3
Male	Control	TRUE	A	5	1	0	0	17	4	1015	453	1574	1343	[1006,444,1027,463]	120.2	0.981	0.7537	2027	9	1	5453	4600	11665	2796	501700	9	4
Male	Control	TRUE	A	5	1	0	0	17	5	855	463	1478	1332	[842,453,865,489]	230.6	0.8963	0.5308	1460	10	1	5292	5135	9582	2308	661456	10	5
Male	Control	TRUE	A	5	1	0	0	17	6	529	613	1284	1248	[514,597,537,629]	168.1	0.8394	0.476	2331	14	1	5105	4712	10550	2271	867901	14	7
Male	Control	TRUE	A	5	1	0	0	17	7	414	680	1217	1207	[400,667,428,696]	218	0.9952	0.848	1587	15	1	4117	3929	8311	1889	720404	15	8
Male	Control	TRUE	A	5	1	0	0	17	8	979	741	1553	1173	[965,730,996,750]	127.6	0.8169	0.4582	2942	16	1	5244	5136	10227	2295	1274360	16	9
Male	Control	TRUE	A	5	1	0	0	17	9	425	788	1223	1144	[411,777,436,799]	149.4	0.9978	0.7257	1499	18	1	3458	3352	6152	1619	511853	18	10
Male	Control	TRUE	A	5	1	0	0	17	10	768	564	1427	1275	[757,552,780,580]	184.6	0.973	0.7546	2543	20	1	6563	7188	10615	2349	1141890	20	11
Male	Control	TRUE	A	5	1	0	0	18	1	822	45	2105	1584	[810,33,834,63]	183.5	0.9259	0.57	2200	1	1	7664	7372	13566	2854	935011	1	1
Male	Control	TRUE	A	5	1	0	0	18	2	232	132	1756	1533	[220,123,246,141]	137.1	0.9309	0.6301	2132	5	1	7223	6876	13869	2645	686221	5	2
Male	Control	TRUE	A	5	1	0	0	18	3	950	167	2180	1512	[932,155,963,179]	200	0.9323	0.5576	1886	7	1	5430	5251	11916	1969	901314	7	3
Male	Control	TRUE	A	5	1	0	0	18	4	814	175	2101	1507	[803,162,826,193]	175.8	0.9452	0.5547	3517	8	1	9173	9280	17021	3337	1531880	8	4
Male	Control	TRUE	A	5	1	0	0	18	5	83	231	1667	1474	[74,222,92,241]	103.7	0.9744	0.7041	2323	9	1	3829	3966	7497	1631	585817	9	5
Male	Control	TRUE	A	5	1	0	0	18	6	912	327	2158	1417	[900,316,924,338]	151.2	1.005	0.8213	2771	16	1	5893	5968	9982	1938	1060660	16	6
Male	Control	TRUE	A	5	1	0	0	18	7	321	330	1808	1414	[312,321,332,343]	128.7	1.002	0.7689	2715	17	1	7356	6614	14020	2995	801752	17	7
Male	Control	TRUE	A	5	1	0	0	18	8	637	368	1996	1393	[629,359,651,377]	111.4	0.8834	0.6434	1501	19	1	3179	3066	6197	1490	346524	19	8
Male	Control	TRUE	A	5	1	0	0	18	9	172	410	1720	1368	[162,396,184,423]	151.9	0.9559	0.5423	2162	21	1	6230	6496	10826	2041	816127	21	9
Male	Control	TRUE	A	5	1	0	0	18	10	662	410	2011	1368	[649,397,678,424]	216.2	0.9762	0.7916	3263	22	1	9227	7957	19825	5551	922725	22	10
Male	Control	TRUE	A	5	1	0	0	18	11	537	425	1936	1360	[524,410,551,437]	186	0.8925	0.7067	2314	23	1	4952	4907	9227	1979	1020100	23	11
Male	Control	TRUE	A	5	1	0	0	18	12	1056	453	2244	1342	[1045,436,1068,472]	230.6	0.9454	0.5899	2380	24	1	5207	5009	9348	2464	1265360	24	12
Male	Control	TRUE	A	5	1	0	0	18	13	364	547	1834	1286	[352,538,378,558]	130.1	0.9181	0.5996	1110	28	1	2428	2227	4634	1273	276736	28	13
Male	Control	TRUE	A	5	1	0	0	18	14	257	669	1770	1213	[248,659,266,684]	133.2	0.9846	0.6833	1495	32	1	3526	3183	7942	1589	426592	31	15
Male	Control	TRUE	A	5	1	0	0	18	15	909	784	2157	1146	[897,772,922,796]	172.6	0.9811	0.721	2501	33	1	5448	5449	10333	2346	1024260	32	16
Male	Control	TRUE	A	5	1	0	0	18	16	1000	804	2210	1134	[985,789,1015,821]	291.1	0.9772	0.7845	1688	34	1	3222	2855	5677	1475	1124610	33	17
Male	Control	TRUE	A	5	1	0	0	18	17	440	825	1879	1121	[429,814,452,841]	189.1	0.9427	0.7186	1936	35	1	5260	4963	10058	2201	852173	34	18
Male	Control	TRUE	A	5	1	0	0	18	18	869	826	2134	1121	[859,816,881,837]	131.1	0.9939	0.8789	1638	36	1	4337	4204	8589	1873	451089	35	19
Male	Control	TRUE	A	5	1	0	0	18	19	263	887	1774	1086	[251,876,275,896]	142	0.8582	0.7087	2409	37	1	4747	4934	8235	1636	882926	36	20
Male	Control	TRUE	A	5	1	0	0	18	20	860	910	2128	1070	[849,899,873,929]	207.4	0.9256	0.7022	1651	38	1	4631	4614	9451	1708	541827	37	21
Male	Control	TRUE	A	5	1	0	0	18	21	576	52	1959	1580	[562,38,590,67]	237	1.001	0.9086	1532	41	1	2603	2345	5815	1214	439987	40	22
Male	Control	TRUE	A	5	1	0	0	18	22	570	600	1955	1255	[558,587,583,616]	193	0.9541	0.7546	1859	43	1	5792	5744	12821	2112	764488	42	23
Male	Control	TRUE	A	5	1	0	0	19	1	160	59	2358	930	[147,46,172,77]	232	0.9114	0.6998	696.6	2	1	2299	2132	4498	1073	289711	2	1
Male	Control	TRUE	A	5	1	0	0	19	2	264	84	2418	914	[249,75,271,97]	115.3	0.8077	0.5263	1465	4	1	5924	6042	10441	2115	1107730	4	2
Male	Control	TRUE	A	5	1	0	0	19	3	232	126	2401	890	[223,116,242,139]	133.9	0.9517	0.7107	1745	6	1	3580	3662	7270	1433	554874	6	3
Male	Control	TRUE	A	5	1	0	0	19	4	577	223	2608	833	[566,213,599,233]	186	0.9193	0.5873	849.2	9	1	1699	1632	2774	1014	275244	9	4
Male	Control	TRUE	A	5	1	0	0	19	5	1049	249	2885	817	[1042,239,1057,262]	112.5	0.8885	0.5749	2738	11	1	5233	5057	8738	2001	795479	11	5
Male	Control	TRUE	A	5	1	0	0	19	6	1019	315	2868	779	[1005,304,1033,328]	175.4	0.9591	0.6272	1720	13	1	5255	5269	9110	1749	693605	13	6
Male	Control	TRUE	A	5	1	0	0	19	7	14	329	2271	769	[4,319,23,345]	144.5	0.9608	0.6598	1602	14	1	3355	3003	7092	1487	516598	14	7
Male	Control	TRUE	A	5	1	0	0	19	8	255	416	2415	715	[247,404,265,438]	164.9	0.8816	0.4724	2174	16	1	5703	5519	10660	2267	821298	16	8
Male	Control	TRUE	A	5	1	0	0	19	9	464	568	2540	628	[454,559,478,578]	129	0.8972	0.6576	950.6	17	1	2099	1996	4036	1030	256034	17	9
Male	Control	TRUE	A	5	1	0	0	19	10	1003	676	2859	565	[986,665,1023,687]	212.7	0.9011	0.5481	2044	18	1	6650	7192	11388	2317	1030710	18	10
Male	Control	TRUE	A	5	1	0	0	19	11	214	741	2392	526	[205,731,228,752]	121.3	0.9303	0.5199	4125	19	1	5088	5365	7792	2184	1343110	19	11
Male	Control	TRUE	A	5	1	0	0	19	12	851	802	2768	489	[840,791,862,817]	158.9	0.9992	0.742	2121	20	1	5081	4510	11550	2123	787557	20	12
Male	Control	TRUE	A	5	1	0	0	19	13	681	972	2667	387	[669,960,694,990]	215.9	0.9753	0.7689	1611	22	1	2981	2779	5441	1272	816790	22	13
Male	Control	TRUE	A	5	1	0	0	19	14	1025	988	2871	379	[1014,979,1036,1000]	130.4	0.9365	0.6301	1549	23	1	3252	3009	6086	1615	396699	23	14
Male	Control	TRUE	A	5	1	0	0	19	15	819	1037	2750	351	[809,1027,834,1048]	152.6	0.9753	0.7044	2035	24	1	5485	5278	9619	2280	740418	24	15
Male	Control	TRUE	A	5	1	0	0	19	16	583	262	2609	809	[570,250,596,276]	195.5	0.976	0.803	1555	25	1	3767	3718	6913	1928	327749	25	16
Male	Control	TRUE	A	5	1	0	0	20	1	265	58	1772	930	[248,45,275,74]	183.5	0.813	0.4665	1715	2	1	4986	4988	8626	2217	673140	1	1
Male	Control	TRUE	A	5	1	0	0	20	2	736	96	2053	909	[725,79,744,111]	154.3	0.7967	0.4385	2278	3	1	5309	5340	10419	2410	1688150	2	2
Male	Control	TRUE	A	5	1	0	0	20	3	173	151	1721	878	[161,129,191,164]	223.2	0.8245	0.4086	1901	5	1	6667	6340	14224	2441	960049	4	3
Male	Control	TRUE	A	5	1	0	0	20	4	980	271	2198	804	[968,258,991,285]	174	0.9395	0.7138	2363	7	1	4747	4846	8051	1846	1030160	6	4
Male	Control	TRUE	A	5	1	0	0	20	5	154	285	1708	792	[138,271,163,315]	227.5	0.7069	0.3786	1442	8	1	2168	2155	2679	1951	288362	7	5
Male	Control	TRUE	A	5	1	0	0	20	6	282	495	1787	672	[272,485,298,506]	167.3	0.9476	0.7102	1459	14	1	3541	3234	6374	1856	474536	12	6
Male	Control	TRUE	A	5	1	0	0	20	7	915	566	2163	628	[898,554,941,584]	270.7	0.871	0.4224	1710	15	1	6227	6491	11218	2289	1052390	13	7
Male	Control	TRUE	A	5	1	0	0	20	8	793	590	2088	616	[782,577,803,602]	148.4	0.9266	0.7001	3156	16	1	7979	8261	14049	2855	1188830	14	8
Male	Control	TRUE	A	5	1	0	0	20	9	1032	697	2228	555	[1015,670,1045,711]	193	0.6834	0.3534	1220	17	1	3502	3603	5805	1552	851097	15	9
Male	Control	TRUE	A	5	1	0	0	20	10	859	798	2127	493	[847,786,872,810]	174.4	0.9407	0.7755	1886	22	1	3174	3197	5185	1926	736464	20	11
Male	Control	TRUE	A	5	1	0	0	20	11	588	871	1964	450	[572,861,597,881]	123.4	0.9055	0.5303	921.2	24	1	2868	2730	4672	1606	536314	22	12
Male	Control	TRUE	A	5	1	0	0	20	12	577	884	1960	442	[566,874,592,893]	126.2	0.9714	0.6325	1471	25	1	2868	2730	4672	1606	536314	23	13
Male	Control	TRUE	A	5	1	0	0	20	13	714	109	2042	902	[701,80,729,127]	302	0.8135	0.4745	1527	29	1	5309	5340	10419	2410	1688150	26	14
Male	Control	TRUE	A	5	1	0	0	20	14	1052	330	2243	770	[1040,319,1070,342]	207.1	0.9516	0.7299	1958	30	1	6724	6771	11528	3053	894264	27	15
Male	Control	TRUE	A	5	1	0	0	21	1	794	343	1443	763	[783,325,806,355]	174	0.9249	0.6427	2192	5	1	7950	7717	14527	3091	826819	4	1
Male	Control	TRUE	A	5	1	0	0	21	2	577	380	1317	742	[554,363,608,391]	318.9	0.7746	0.3533	1114	6	1	3027	2956	4944	1336	768869	5	2
Male	Control	TRUE	A	5	1	0	0	21	3	676	409	1374	722	[668,400,690,419]	122	0.8992	0.6673	2704	7	1	7056	7163	11978	3410	677423	6	3
Male	Control	TRUE	A	5	1	0	0	21	4	430	432	1224	713	[405,402,444,446]	328.7	0.6977	0.4745	1862	9	1	6601	6126	12874	2810	1234380	8	4
Male	Control	TRUE	A	5	1	0	0	21	5	394	452	1205	697	[382,434,405,473]	248.2	0.9009	0.5435	1968	10	1	4553	4405	8257	2808	628338	9	5
Male	Control	TRUE	A	5	1	0	0	21	6	345	624	1178	592	[334,612,360,651]	244	0.8806	0.4541	1406	11	1	4467	4797	7578	1686	759365	10	6
Male	Control	TRUE	A	5	1	0	0	21	7	712	736	1394	531	[701,718,724,749]	177.5	0.9816	0.5732	2006	13	1	5679	5566	10540	2942	755283	12	7
Male	Control	TRUE	A	5	1	0	0	21	8	988	815	1558	482	[974,804,1003,828]	187.4	0.9666	0.6667	1620	14	1	5156	5061	8506	2031	680643	13	8
Male	Control	TRUE	A	5	1	0	0	22	1	803	180	803	859	[789,166,820,199]	241.2	0.8856	0.5813	3260	3	1	6809	6854	11104	3310	2464910	2	1
Male	Control	TRUE	A	5	1	0	0	22	2	640	418	705	717	[629,407,651,430]	150.5	0.9843	0.8303	2469	7	1	7853	7219	15755	3179	824554	5	3
Male	Control	TRUE	A	5	1	0	0	22	3	20	469	338	686	[10,458,31,486]	174.4	0.9557	0.691	1271	8	1	3593	3296	6742	1592	470667	6	4
Male	Control	TRUE	A	5	1	0	0	22	4	382	906	554	428	[372,896,398,917]	164.9	0.9547	0.6811	2618	10	1	6278	6367	10290	2459	1067200	8	5
Male	Control	TRUE	A	5	1	0	0	22	5	124	978	399	386	[113,967,135,991]	142	0.9509	0.6687	2319	11	1	3197	3042	5742	1928	741759	9	6
Male	Control	TRUE	A	5	1	0	0	24	1	982	125	-384	891	[969,114,993,136]	142.4	0.9872	0.6104	2728	4	1	7583	7165	13802	3796	864507	4	1
Male	Control	TRUE	A	5	1	0	0	24	2	1038	227	-351	829	[1021,205,1050,252]	312.9	0.8223	0.4527	2071	6	1	5946	5848	12394	2337	1557930	6	2
Male	Control	TRUE	A	5	1	0	0	24	3	145	244	-878	821	[135,233,164,255]	178.2	0.8962	0.5803	2455	7	1	7046	6808	13489	2567	1070930	7	3
Male	Control	TRUE	A	5	1	0	0	24	4	454	255	-697	814	[440,238,466,274]	249.6	0.9273	0.5177	1131	8	1	3974	3736	8848	1705	560352	8	4
Male	Control	TRUE	A	5	1	0	0	24	5	328	393	-770	732	[319,385,342,402]	113.6	0.9477	0.6186	2301	11	1	5565	5654	10132	2226	606636	11	5
Male	Control	TRUE	A	5	1	0	0	24	6	795	483	-493	679	[785,473,809,495]	147.7	0.9733	0.7499	1733	12	1	3221	3132	5737	1599	563737	12	6
Male	Control	TRUE	A	5	1	0	0	24	7	399	575	-729	624	[388,565,410,588]	151.5	0.9713	0.7691	3311	13	1	8127	8320	16119	2890	1259690	13	7
Male	Control	TRUE	A	5	1	0	0	24	8	490	611	-675	603	[474,599,503,626]	222.2	0.8432	0.7243	1919	14	1	2622	2530	3572	2333	309397	14	8
Male	Control	TRUE	A	5	1	0	0	24	9	473	637	-685	588	[463,627,484,648]	137.5	0.9492	0.7995	2174	15	1	4647	4310	7998	2741	404279	15	9
Male	Control	TRUE	A	5	1	0	0	24	10	1036	674	-350	566	[1023,656,1053,689]	271.1	0.961	0.6789	1028	17	1	2765	2655	4401	1640	475660	17	10
Male	Control	TRUE	A	5	1	0	0	24	11	421	676	-716	564	[411,658,432,698]	248.2	0.8369	0.4845	1828	18	1	5597	5727	9891	1951	1097080	18	11
Male	Control	TRUE	A	5	1	0	0	24	12	850	747	-462	523	[839,735,861,758]	150.1	0.9659	0.8186	2562	19	1	5945	5538	11858	2450	921425	19	12
Male	Control	TRUE	A	5	1	0	0	24	13	664	776	-572	504	[652,765,676,795]	192.3	0.9106	0.6667	1448	20	1	3403	3462	5680	1697	571708	20	13
Male	Control	TRUE	A	5	1	0	0	24	14	461	940	-693	409	[444,922,476,953]	212.4	0.853	0.4972	2030	22	1	5263	5538	9085	2253	915730	22	14
Male	Control	TRUE	A	5	1	0	0	24	15	653	948	-578	403	[639,936,667,961]	195.1	0.9603	0.7845	1642	23	1	5691	6124	10127	2014	751226	23	15
Male	Control	TRUE	A	5	1	0	0	24	16	1042	1040	-348	348	[1033,1029,1050,1053]	124.8	0.9648	0.6518	1840	25	1	5138	4941	9346	2603	524094	24	16
Male	Control	TRUE	A	5	1	0	0	24	17	931	1011	-414	366	[913,997,950,1028]	292.9	0.9343	0.5663	2115	27	1	5631	5667	9378	2173	1452700	25	17
Male	Control	TRUE	A	5	1	0	0	25	1	401	59	-1375	932	[380,44,416,70]	183.2	0.835	0.3656	3539	2	1	11019	10896	18541	5102	1201120	1	1
Male	Control	TRUE	A	5	1	0	0	25	2	1007	138	-1013	884	[992,124,1027,152]	269.7	0.9829	0.6845	2412	4	1	5505	5548	10301	2198	1591060	3	2
Male	Control	TRUE	A	5	1	0	0	25	3	996	186	-1018	856	[984,175,1018,197]	213.8	0.8795	0.5435	760	5	1	3184	2962	7627	1293	283377	4	3
Male	Control	TRUE	A	5	1	0	0	25	4	461	238	-1338	822	[452,229,471,256]	126.2	0.8396	0.4886	2499	6	1	6368	5610	14794	2343	1095350	5	4
Male	Control	TRUE	A	5	1	0	0	25	5	476	310	-1329	782	[464,298,488,323]	178.2	0.9999	0.8153	2938	9	1	7802	7837	13751	2844	1271700	8	6
Male	Control	TRUE	A	5	1	0	0	25	6	574	340	-1271	764	[563,329,587,353]	158.9	0.9821	0.6983	2147	10	1	4711	4484	8241	2300	782027	9	7
Male	Control	TRUE	A	5	1	0	0	25	7	497	428	-1317	708	[489,420,504,449]	134.7	0.8889	0.4806	2277	13	1	5525	4954	12260	2242	701611	11	8
Male	Control	TRUE	A	5	1	0	0	25	8	829	478	-1119	682	[819,468,840,489]	129	0.9843	0.833	1184	14	1	2024	1940	5673	1105	360340	12	9
Male	Control	TRUE	A	5	1	0	0	25	9	880	483	-1094	675	[856,471,890,508]	239.1	0.8486	0.3519	2436	15	1	7859	8081	13393	2716	1029570	13	10
Male	Control	TRUE	A	5	1	0	0	25	10	358	476	-1395	682	[351,471,379,491]	110	0.7073	0.3168	818.1	16	1	2680	2247	4796	1588	302786	14	11
Male	Control	TRUE	A	5	1	0	0	25	11	361	490	-1397	675	[350,481,375,499]	122	0.9703	0.6813	927.7	17	1	2680	2247	4796	1588	302786	15	12
Male	Control	TRUE	A	5	1	0	0	25	12	607	595	-1252	613	[595,583,619,606]	146.3	0.9677	0.8016	2778	20	1	5381	5344	10367	2169	1017000	18	13
Male	Control	TRUE	A	5	1	0	0	25	13	1035	875	-997	448	[1026,865,1049,885]	129.4	0.9319	0.6947	1766	24	1	2911	2955	4165	1428	407600	22	14
Male	Control	TRUE	A	5	1	0	0	25	14	454	972	-1342	389	[442,960,465,988]	187.7	0.9385	0.7294	1894	26	1	4109	3947	7497	1819	854587	24	15
Male	Control	TRUE	A	5	1	0	0	25	15	792	844	-1142	465	[776,831,805,859]	239.8	0.9673	0.7396	1961	29	1	5262	5749	8883	2057	1094390	27	16
Male	Control	TRUE	A	5	1	0	0	26	1	329	18	-2062	955	[316,7,344,30]	182.1	0.9653	0.6607	1911	2	1	4804	4483	8640	3119	744560	2	1
Male	Control	TRUE	A	5	1	0	0	26	2	917	56	-1713	933	[902,47,933,65]	156.8	0.8967	0.5449	1398	3	1	4508	4070	9374	1989	450826	3	2
Male	Control	TRUE	A	5	1	0	0	26	3	208	83	-2131	917	[196,72,229,95]	217.6	0.9391	0.6529	2101	4	1	5719	6073	9688	1997	1109480	4	3
Male	Control	TRUE	A	5	1	0	0	26	4	417	135	-2009	885	[405,123,433,147]	201.8	0.9945	0.7714	1937	6	1	7640	7743	13638	2976	855687	6	4
Male	Control	TRUE	A	5	1	0	0	26	5	333	196	-2059	849	[321,184,350,209]	181.4	0.9942	0.6308	2052	7	1	6248	5569	11914	3342	668500	7	5
Male	Control	TRUE	A	5	1	0	0	26	6	845	194	-1755	850	[836,185,859,204]	135.4	0.9404	0.6966	3105	8	1	5515	5820	10062	2137	1069970	8	6
Male	Control	TRUE	A	5	1	0	0	26	7	642	227	-1876	832	[629,214,657,240]	209.9	0.9064	0.7243	2037	9	1	4255	4660	6359	1545	1059450	9	7
Male	Control	TRUE	A	5	1	0	0	26	8	445	253	-2001	814	[409,242,455,268]	310.8	0.8022	0.4053	1527	11	1	7660	7681	13567	2862	1011080	11	8
Male	Control	TRUE	A	5	1	0	0	26	9	580	289	-1913	794	[565,278,595,300]	198.3	0.9411	0.6574	1354	12	1	3006	2848	5071	1214	622318	12	9
Male	Control	TRUE	A	5	1	0	0	26	10	50	297	-2223	790	[39,286,78,308]	256.6	0.8853	0.5575	2014	13	1	6199	6568	10148	2241	1196380	13	10
Male	Control	TRUE	A	5	1	0	0	26	11	123	387	-2183	736	[114,378,137,397]	136.8	0.9636	0.706	1401	14	1	3021	2947	4784	1718	350392	14	11
Male	Control	TRUE	A	5	1	0	0	26	12	854	402	-1749	728	[846,394,868,410]	111.4	0.9185	0.622	2497	15	1	5768	5819	8477	3273	634521	15	12
Male	Control	TRUE	A	5	1	0	0	26	13	786	421	-1791	716	[773,407,800,434]	202.5	0.9391	0.6784	1923	16	1	7207	6552	13741	3683	821560	16	13
Male	Control	TRUE	A	5	1	0	0	26	14	361	507	-2043	665	[350,494,371,520]	153.3	0.978	0.6542	2400	18	1	5786	5742	10689	2853	833131	18	14
Male	Control	TRUE	A	5	1	0	0	26	15	81	661	-2207	573	[73,653,97,671]	129.4	0.9673	0.6667	2168	21	1	5486	5525	10872	2145	663824	21	15
Male	Control	TRUE	A	5	1	0	0	26	16	981	664	-1678	571	[960,652,995,679]	245.7	0.9683	0.6678	999	22	1	2407	2367	3973	1396	450076	22	16
Male	Control	TRUE	A	5	1	0	0	26	17	30	707	-2239	546	[19,696,42,720]	158.9	0.9655	0.7708	2078	23	1	5053	5014	8171	3315	565959	23	17
Male	Control	TRUE	A	5	1	0	0	26	18	798	735	-1784	529	[783,724,810,749]	183.9	0.9412	0.7316	1800	24	1	4617	4565	8957	1788	743412	24	18
Male	Control	TRUE	A	5	1	0	0	26	19	1015	742	-1656	524	[1001,731,1026,761]	180.7	0.9315	0.6125	1369	25	1	5144	5125	9769	2251	468144	25	19
Male	Control	TRUE	A	5	1	0	0	26	20	297	774	-2080	507	[286,763,310,787]	162.1	0.9607	0.7126	814.5	27	1	2245	2212	3575	1210	195307	27	20
Male	Control	TRUE	A	5	1	0	0	26	21	792	822	-1789	478	[773,813,803,832]	143.8	0.7982	0.4453	1644	28	1	4996	5061	7817	2208	439641	28	21
Male	Control	TRUE	A	5	1	0	0	26	22	843	839	-1757	468	[833,829,855,850]	137.5	0.9666	0.6672	2393	29	1	6917	6984	11602	2583	774662	29	22
Male	Control	TRUE	A	5	1	0	0	26	23	542	888	-1935	438	[530,875,556,908]	230.3	0.9446	0.6097	1616	30	1	3675	3846	6441	1363	915009	30	23
Male	Control	TRUE	A	5	1	0	0	26	24	1005	918	-1662	420	[994,910,1013,929]	107.2	0.9151	0.7749	1220	31	1	2193	2141	3396	1378	236893	31	24
Male	Control	TRUE	A	5	1	0	0	27	1	275	74	-2740	921	[265,63,286,87]	134.3	1.008	0.7521	1684	2	1	2593	2495	4958	1257	547115	1	1
Male	Control	TRUE	A	5	1	0	0	27	2	645	122	-2521	894	[635,110,654,132]	120.6	0.9097	0.6825	1470	4	1	2813	2814	4695	1377	413579	2	2
Male	Control	TRUE	A	5	1	0	0	27	3	846	193	-2400	850	[834,178,864,210]	233.1	0.8903	0.5288	1524	6	1	7436	7034	13489	2957	713858	4	3
Male	Control	TRUE	A	5	1	0	0	27	4	1011	272	-2303	804	[1000,261,1025,283]	166.6	0.9768	0.8132	1012	7	1	1827	1871	2727	1059	341732	5	4
Male	Control	TRUE	A	5	1	0	0	27	5	84	314	-2854	779	[72,296,96,332]	224	0.9166	0.5973	2027	8	1	5638	5612	11437	2117	1082560	6	5
Male	Control	TRUE	A	5	1	0	0	27	6	560	488	-2570	677	[544,478,578,498]	200.4	0.894	0.5754	1418	12	1	3462	3177	6355	1691	647400	10	7
Male	Control	TRUE	A	5	1	0	0	27	7	660	678	-2508	563	[645,666,686,692]	276	0.9022	0.5319	2387	18	1	7297	7155	14248	3094	1532310	16	8
Male	Control	TRUE	A	5	1	0	0	27	8	304	714	-2722	540	[293,697,317,739]	222.5	0.7469	0.364	2068	20	1	6347	6184	11308	2697	1015460	18	9
Male	Control	TRUE	A	5	1	0	0	27	9	456	740	-2633	524	[445,730,466,758]	171.6	0.9776	0.6799	1278	21	1	4445	3922	9247	2025	408956	19	10
Male	Control	TRUE	A	5	1	0	0	27	10	496	1035	-2609	350	[487,1026,506,1050]	130.4	0.9907	0.7297	1165	25	1	2557	2550	4500	943	355374	23	12
Male	Control	TRUE	A	5	1	0	0	27	11	377	1048	-2679	344	[366,1036,389,1062]	173.3	0.9373	0.7569	1667	26	1	4023	4132	6299	1582	671844	24	13
Male	Control	TRUE	A	5	1	0	0	28	1	31	90	-2884	265	[21,79,42,108]	163.1	0.9975	0.6407	2022	3	1	6373	6465	10830	2326	771134	2	1
Male	Control	TRUE	A	5	1	0	0	28	2	847	135	-2401	239	[835,122,858,150]	188.1	0.9396	0.6485	1536	4	1	3946	3781	6987	2143	584048	3	2
Male	Control	TRUE	A	5	1	0	0	28	3	32	224	-2885	186	[19,210,44,244]	235.6	0.9444	0.6678	1524	7	1	3943	3922	7041	1578	835998	6	3
Male	Control	TRUE	A	5	1	0	0	28	4	864	347	-2391	114	[855,338,876,357]	117.4	1.028	0.8242	2684	8	1	5127	5189	9599	2178	753691	7	4
Male	Control	TRUE	A	5	1	0	0	28	5	730	512	-2468	16	[715,491,758,531]	286.2	0.6229	0.407	1152	10	1	4007	3763	5559	3346	460769	9	6
Male	Control	TRUE	A	5	1	0	0	28	6	772	600	-2445	-38	[759,583,784,625]	302	0.9185	0.5633	1239	15	1	3961	3858	6867	1704	756459	14	7
Male	Control	TRUE	A	5	1	0	0	28	7	101	707	-2843	-100	[90,696,113,723]	170.9	0.9752	0.663	2601	17	1	5907	5555	10873	2350	1063210	16	8
Male	Control	TRUE	A	5	1	0	0	28	8	954	729	-2337	-113	[940,719,969,740]	174	0.97	0.6351	2131	18	1	4754	4672	8602	2288	855780	17	9
Male	Control	TRUE	A	5	1	0	0	28	9	709	448	-2484	55	[692,425,722,467]	283	0.9049	0.5117	2395	23	1	11705	11856	21061	4596	1404620	21	10
Male	Control	TRUE	A	5	1	0	0	28	10	981	569	-2323	-17	[961,555,996,582]	255.6	0.9284	0.6478	1658	24	1	4282	4305	9510	1661	946267	22	11
Male	Control	TRUE	A	5	1	0	0	28	11	149	678	-2811	-82	[137,664,172,691]	268.3	0.9088	0.641	2057	25	1	6422	5843	11963	3636	577980	23	12
Male	Control	TRUE	A	5	1	0	0	29	1	189	32	-2147	299	[166,20,199,50]	180.4	0.6874	0.3404	1459	2	1	3861	3817	6381	1783	621603	2	1
Male	Control	TRUE	A	5	1	0	0	29	2	171	37	-2155	297	[163,27,185,47]	111.8	0.9024	0.6143	807.7	3	1	3861	3817	6381	1783	621603	3	2
Male	Control	TRUE	A	5	1	0	0	29	3	822	45	-1770	292	[810,33,831,58]	137.5	0.9492	0.6009	1936	4	1	4679	4817	7716	2121	617565	4	3
Male	Control	TRUE	A	5	1	0	0	29	4	187	116	-2146	250	[177,105,198,133]	157.9	0.9782	0.7017	2594	5	1	6258	6019	11041	2991	882362	5	4
Male	Control	TRUE	A	5	1	0	0	29	5	205	354	-2136	110	[191,342,219,366]	177.2	0.9804	0.6581	2040	9	1	4614	4270	8780	2448	766006	9	5
Male	Control	TRUE	A	5	1	0	0	29	6	1009	428	-1658	66	[998,418,1022,438]	139.2	0.9921	0.774	1537	11	1	4123	3832	9797	2015	395793	11	6
Male	Control	TRUE	A	5	1	0	0	29	7	161	474	-2163	38	[152,463,169,488]	111.1	0.818	0.5586	1544	12	1	2215	2127	4277	1011	349932	12	7
Male	Control	TRUE	A	5	1	0	0	29	8	516	618	-1951	-47	[504,604,528,632]	174	0.9546	0.6732	1841	17	1	4875	4520	9344	2494	677613	16	8
Male	Control	TRUE	A	5	1	0	0	29	9	897	661	-1724	-73	[885,649,912,676]	199.7	0.9591	0.6812	1512	19	1	4923	4522	9450	1931	679361	17	9
Male	Control	TRUE	A	5	1	0	0	29	10	922	742	-1710	-120	[912,732,934,752]	123.1	0.8875	0.7039	1406	21	1	3878	4209	6222	1449	395524	19	10
Male	Control	TRUE	A	5	1	0	0	29	11	456	807	-1989	-160	[439,798,466,820]	142.7	0.8468	0.5557	2694	22	1	6021	6214	11354	2075	975406	20	11
Male	Control	TRUE	A	5	1	0	0	29	12	121	837	-2188	-176	[91,825,143,851]	323.4	0.7661	0.4348	1124	23	1	3951	3680	8578	1713	687423	21	12
Male	Control	TRUE	A	5	1	0	0	29	13	345	976	-2052	-259	[328,960,370,993]	328	0.7726	0.5187	1868	25	1	5675	5686	9357	2503	1055610	23	13
Male	Control	TRUE	A	5	1	0	0	29	14	367	994	-2040	-272	[352,979,380,1016]	269.7	0.8899	0.6938	2361	26	1	6083	5857	12425	2720	991516	24	14
Male	Control	TRUE	A	5	1	0	0	30	1	481	140	-1326	237	[471,129,491,152]	133.2	0.8832	0.6555	1163	3	1	2437	2324	3886	1537	272901	3	1
Male	Control	TRUE	A	5	1	0	0	30	2	138	192	-1530	206	[125,176,148,203]	123.1	0.7353	0.4905	1120	5	1	2730	2625	4964	1714	461376	5	3
Male	Control	TRUE	A	5	1	0	0	30	3	193	260	-1497	166	[183,245,203,274]	158.9	0.9039	0.5708	1998	7	1	6346	5976	13454	2563	691724	7	4
Male	Control	TRUE	A	5	1	0	0	30	4	1025	370	-1003	102	[1011,350,1037,383]	206.4	0.8497	0.5557	595.6	8	1	3120	2861	6232	1350	530448	8	5
Male	Control	TRUE	A	5	1	0	0	30	5	1009	379	-1010	93	[1003,370,1025,393]	104.1	0.8149	0.379	1318	9	1	3120	2861	6232	1350	530448	9	6
Male	Control	TRUE	A	5	1	0	0	30	6	502	427	-1315	66	[490,417,511,439]	137.8	0.9338	0.6818	2142	10	1	5433	5798	8993	2128	689993	10	7
Male	Control	TRUE	A	5	1	0	0	30	7	304	470	-1431	41	[294,444,315,492]	284.8	0.7853	0.413	857.9	11	1	2242	2118	4247	992	524583	11	8
Male	Control	TRUE	A	5	1	0	0	30	8	286	791	-1442	-149	[276,779,295,802]	138.5	0.8739	0.6357	1904	14	1	4575	4021	8797	1905	626776	14	9
Male	Control	TRUE	A	5	1	0	0	30	9	485	971	-1326	-259	[468,961,496,991]	197.9	0.8875	0.4766	1814	16	1	5281	5129	10081	1833	850264	16	10
Male	Control	TRUE	A	5	1	0	0	31	1	157	31	-873	301	[145,18,168,43]	167.7	0.9804	0.7647	1514	3	1	3591	3430	6362	1505	574601	2	1
Male	Control	TRUE	A	5	1	0	0	31	2	1015	67	-364	280	[1003,55,1028,78]	154.3	0.9993	0.7451	1645	4	1	4765	4425	8503	2108	528954	3	2
Male	Control	TRUE	A	5	1	0	0	31	3	372	126	-745	244	[357,113,385,142]	227.1	0.9631	0.8184	3567	8	1	9749	9908	15097	5730	1062600	7	3
Male	Control	TRUE	A	5	1	0	0	31	4	1024	222	-359	187	[1014,211,1034,238]	171.2	0.9606	0.7267	1657	11	1	4361	3768	8888	2343	566923	10	4
Male	Control	TRUE	A	5	1	0	0	31	5	591	430	-614	64	[583,422,603,439]	107.2	0.9533	0.7822	2783	13	1	6694	7131	10109	2325	743034	11	5
Male	Control	TRUE	A	5	1	0	0	31	6	706	514	-545	15	[693,500,727,528]	259.1	0.9359	0.5996	1727	14	1	5389	5072	9942	2294	1002300	12	6
Male	Control	TRUE	A	5	1	0	0	31	7	1012	511	-365	16	[1001,500,1024,524]	156.8	1.009	0.8594	2113	15	1	7172	6205	14369	3516	652623	13	7
Male	Control	TRUE	A	5	1	0	0	31	8	325	844	-772	-181	[310,829,343,859]	262.6	0.826	0.5475	1985	19	1	4892	4756	7412	3096	1027250	17	8
Male	Control	TRUE	A	5	1	0	0	31	9	103	869	-905	-197	[88,855,116,887]	238	0.9376	0.6469	2530	20	1	9623	9973	16132	3398	1405000	18	9
Male	Control	TRUE	A	5	1	0	0	31	10	583	999	-620	-272	[573,986,593,1009]	117.8	0.9316	0.5468	1389	22	1	2890	2599	4967	1455	367037	20	10
Male	Control	TRUE	A	5	1	0	0	31	11	921	1001	-420	-274	[906,992,933,1010]	130.8	0.9046	0.56	2433	23	1	6777	6321	12094	3914	616685	21	11
Male	Control	TRUE	A	5	1	0	0	31	12	721	14	-538	311	[709,2,735,28]	182.5	1.014	0.7733	1738	24	1	5565	5491	9459	2178	701127	22	12
Male	Control	TRUE	A	5	1	0	0	31	13	20	768	-954	-136	[8,751,33,783]	194.4	0.944	0.6708	1671	25	1	5763	5024	10782	2724	605129	23	13
Male	Control	TRUE	A	5	1	0	0	32	1	334	35	524	298	[324,25,345,50]	162.8	0.9795	0.7866	2009	1	1	5031	5249	9294	1938	774844	1	1
Male	Control	TRUE	A	5	1	0	0	32	2	400	478	563	35	[387,463,413,496]	236.3	0.9722	0.7164	1715	4	1	6322	6434	11439	2416	891406	4	2
Male	Control	TRUE	A	5	1	0	0	32	3	370	635	547	-57	[360,625,387,647]	166.3	0.9755	0.6553	2788	5	1	10052	9247	20996	4117	1055500	5	3
Male	Control	TRUE	A	5	1	0	0	32	4	844	681	827	-84	[835,672,856,692]	123.8	0.8591	0.6099	1861	6	1	5927	6254	9293	2692	764522	6	4
Male	Control	TRUE	A	5	1	0	0	32	5	913	942	868	-239	[903,933,926,953]	120.9	0.9113	0.4938	2799	11	1	7190	7481	11290	2443	869992	11	6
Male	Control	TRUE	A	5	1	0	0	32	6	925	1011	875	-280	[916,1002,936,1020]	112.5	0.9814	0.8119	3201	12	1	6714	7132	11098	2298	913068	12	7
Male	Control	TRUE	A	5	1	0	0	32	7	484	1010	614	-280	[473,994,499,1029]	232.4	0.9497	0.5522	1561	13	1	3950	3719	7398	1602	825617	13	8
Male	Control	TRUE	A	5	1	0	0	32	8	193	335	439	120	[175,322,207,351]	249.6	0.9393	0.6496	2097	15	1	5764	6058	9820	1921	1285280	14	9
Male	Control	TRUE	A	5	1	0	0	33	1	1056	72	1599	277	[1039,60,1075,86]	239.1	0.9657	0.5676	1609	2	1	5003	5191	9492	1860	890499	2	1
Male	Control	TRUE	A	5	1	0	0	33	2	586	128	1319	245	[572,113,598,139]	158.6	0.8745	0.503	2931	3	1	7526	8066	13674	2593	1151410	3	2
Male	Control	TRUE	A	5	1	0	0	33	3	995	191	1564	206	[982,181,1014,206]	194.8	0.9044	0.5393	1617	4	1	5363	5195	10627	2129	670395	4	3
Male	Control	TRUE	A	5	1	0	0	33	4	568	223	1308	186	[551,205,583,244]	276.7	0.8621	0.5013	1956	5	1	7188	7446	11624	2645	1229200	5	4
Male	Control	TRUE	A	5	1	0	0	33	5	749	317	1414	126	[735,307,762,353]	260.5	0.8127	0.3619	883.5	7	1	4247	4218	6658	1831	594580	7	5
Male	Control	TRUE	A	5	1	0	0	33	6	751	353	1418	112	[741,338,762,363]	124.5	0.8621	0.4574	1350	9	1	4247	4218	6658	1831	594580	9	6
Male	Control	TRUE	A	5	1	0	0	33	7	520	453	1279	52	[503,440,533,467]	231.3	0.8979	0.6623	1917	12	1	6429	5661	12365	2998	887236	11	7
Male	Control	TRUE	A	5	1	0	0	33	8	1050	603	1595	-39	[1040,594,1061,618]	145.2	0.8843	0.6389	2065	17	1	5595	5723	9056	2238	727383	14	8
Male	Control	TRUE	A	5	1	0	0	33	9	961	606	1541	-41	[951,595,972,623]	176.5	0.9327	0.6346	1052	18	1	2584	2522	4095	1623	304959	15	9
Male	Control	TRUE	A	5	1	0	0	33	10	357	612	1182	-45	[342,599,369,631]	226.4	0.9352	0.6508	1744	19	1	4977	4663	9721	2568	577320	16	10
Male	Control	TRUE	A	5	1	0	0	33	11	629	664	1345	-75	[619,645,640,684]	230.3	0.8839	0.4992	2557	20	1	6962	7140	12046	3296	967775	17	11
Male	Control	TRUE	A	5	1	0	0	33	12	898	668	1504	-76	[885,656,911,680]	173.3	0.9835	0.7794	3627	22	1	8262	8381	14690	3687	1503720	19	12
Male	Control	TRUE	A	5	1	0	0	33	13	545	765	1296	-134	[535,755,558,777]	129.7	1.007	0.7346	2382	25	1	7541	7745	13080	2695	738984	22	13
Male	Control	TRUE	A	5	1	0	0	33	14	94	884	1026	-204	[73,875,109,894]	178.6	0.834	0.4669	1005	26	1	3598	3422	6483	1334	384954	23	14
Male	Control	TRUE	A	5	1	0	0	33	15	135	1041	1051	-299	[119,1025,149,1058]	263	0.9322	0.7267	2723	31	1	7065	6994	11929	3329	1716790	26	15
Male	Control	TRUE	A	5	1	0	0	34	1	680	21	2020	307	[666,11,690,32]	151.2	0.9371	0.6966	2343	1	1	7178	7649	12169	2610	818237	1	1
Male	Control	TRUE	A	5	1	0	0	34	2	481	97	1903	264	[465,82,495,109]	219.4	0.9569	0.6986	1446	4	1	4874	4464	8983	2350	545932	4	2
Male	Control	TRUE	A	5	1	0	0	34	3	624	118	1991	249	[611,107,650,130]	228.5	0.8258	0.507	962.5	6	1	2623	2632	4063	1212	440716	6	3
Male	Control	TRUE	A	5	1	0	0	34	4	433	216	1875	192	[419,203,449,230]	233.4	0.9522	0.7473	2950	8	1	6562	6699	11811	2357	1745570	8	4
Male	Control	TRUE	A	5	1	0	0	34	5	753	247	2064	173	[734,232,769,262]	218.3	0.6968	0.4999	2946	9	1	6734	6237	10626	3832	929334	9	5
Male	Control	TRUE	A	5	1	0	0	34	6	57	259	1652	167	[41,244,74,274]	231.3	0.9344	0.5182	2254	11	1	8566	8575	17910	3413	1070780	11	6
Male	Control	TRUE	A	5	1	0	0	34	7	168	250	1718	170	[158,238,180,267]	168.4	0.936	0.5983	1922	12	1	4443	4552	7163	1695	768714	12	7
Male	Control	TRUE	A	5	1	0	0	34	8	380	349	1843	113	[369,338,391,361]	143.1	0.9551	0.8016	2387	14	1	5923	5677	9996	2926	787809	14	8
Male	Control	TRUE	A	5	1	0	0	34	9	579	368	1961	101	[569,358,589,379]	126.9	0.9384	0.7059	2294	15	1	5439	5366	9279	2778	565667	15	9
Male	Control	TRUE	A	5	1	0	0	34	10	326	627	1808	-52	[298,611,338,638]	206	0.6569	0.4505	2892	18	1	7749	7574	11851	4104	1077170	18	10
Male	Control	TRUE	A	5	1	0	0	34	11	681	734	2021	-116	[670,723,693,746]	155.4	1.003	0.7981	2611	21	1	5284	5358	8935	2526	956434	20	11
Male	Control	TRUE	A	5	1	0	0	34	12	307	757	1800	-130	[295,744,323,771]	214.8	0.9724	0.7959	1901	22	1	6502	6761	11200	2653	903737	21	12
Male	Control	TRUE	A	5	1	0	0	34	13	417	770	1867	-137	[407,760,433,782]	153.6	0.9305	0.5924	1771	23	1	3120	2979	5194	1628	617729	22	13
Male	Control	TRUE	A	5	1	0	0	34	14	583	937	1963	-236	[571,926,594,948]	144.8	1.016	0.8016	2118	26	1	5315	4999	9898	3426	627158	25	15
Male	Control	TRUE	A	5	1	0	0	34	15	841	451	2116	53	[827,436,854,465]	210.6	0.9611	0.7086	1253	30	1	4310	4286	7760	1709	530092	28	16
Male	Control	TRUE	A	5	1	0	0	35	1	835	35	2759	298	[824,24,845,46]	125.9	0.9165	0.6756	1762	1	1	4804	4856	8321	1741	533264	1	1
Male	Control	TRUE	A	5	1	0	0	35	2	379	140	2488	235	[370,129,389,157]	148.4	0.9591	0.5967	2590	2	1	5722	5661	9905	2251	772457	2	2
Male	Control	TRUE	A	5	1	0	0	35	3	117	214	2334	192	[106,202,132,229]	190.6	0.9614	0.7067	1122	4	1	3121	2856	6946	1407	421273	4	3
Male	Control	TRUE	A	5	1	0	0	35	4	1012	500	2864	22	[1004,492,1021,512]	102.3	0.9875	0.7722	4107	7	1	7828	8061	13468	2688	1088110	7	4
Male	Control	TRUE	A	5	1	0	0	35	5	691	658	2673	-72	[680,645,701,676]	184.2	0.9423	0.6325	2703	8	1	6237	6375	10012	2137	1284820	8	5
Male	Control	TRUE	A	5	1	0	0	35	6	550	906	2590	-217	[536,896,566,916]	153.3	0.9138	0.5311	1248	13	1	2484	2670	3516	949	469513	13	6
Male	Control	TRUE	A	5	1	0	0	36	1	851	138	2768	-408	[838,126,865,151]	200.4	0.9904	0.7543	3378	1	1	10423	9874	20267	5287	1021410	1	1
Male	Control	TRUE	A	5	1	0	0	36	2	640	142	2643	-410	[628,129,654,153]	162.1	0.977	0.6923	2278	2	1	7018	6567	13622	3028	786025	2	2
Male	Control	TRUE	A	5	1	0	0	36	3	517	355	2570	-535	[507,340,527,367]	155.7	0.9381	0.6325	2721	3	1	7342	6960	13283	2950	1027900	3	3
Male	Control	TRUE	A	5	1	0	0	36	4	354	488	2474	-616	[343,477,367,500]	165.2	0.9719	0.7868	2724	4	1	7773	7666	13065	3696	1057190	4	4
Male	Control	TRUE	A	5	1	0	0	36	5	1013	843	2866	-826	[1004,833,1031,856]	158.2	0.8211	0.6168	1806	5	1	3956	3978	6198	1658	696240	5	5
Male	Control	TRUE	A	5	1	0	0	36	6	319	878	2453	-847	[306,866,333,891]	178.2	1.016	0.8333	2814	6	1	6747	6587	12277	4367	829917	6	6
Male	Control	TRUE	A	5	1	0	0	37	1	728	26	2049	-342	[717,9,740,44]	216.9	0.9373	0.5943	1934	1	1	4032	3910	7003	1989	1011920	1	1
Male	Control	TRUE	A	5	1	0	0	37	2	870	131	2134	-403	[859,117,884,143]	170.2	0.9125	0.6802	1739	2	1	5460	5686	9050	2229	649775	2	2
Male	Control	TRUE	A	5	1	0	0	37	3	612	229	1980	-462	[600,218,626,242]	161.7	0.9595	0.6585	1477	3	1	3548	3826	5719	1601	500255	3	3
Male	Control	TRUE	A	5	1	0	0	37	4	690	240	2027	-470	[680,228,701,257]	174.7	0.9568	0.6466	2063	5	1	6228	6343	11507	2245	828342	5	4
Male	Control	TRUE	A	5	1	0	0	37	5	781	297	2082	-503	[770,286,795,309]	155.4	0.986	0.7047	1237	6	1	3694	3762	6035	1739	417419	6	5
Male	Control	TRUE	A	5	1	0	0	37	6	745	418	2059	-575	[736,410,754,430]	105.5	0.9637	0.7122	3367	7	1	5282	5530	9322	1868	929648	7	6
Male	Control	TRUE	A	5	1	0	0	37	7	443	429	1879	-580	[427,409,455,443]	229.9	0.8499	0.5761	1732	8	1	6868	6712	12302	2882	831081	8	7
Male	Control	TRUE	A	5	1	0	0	37	8	185	540	1727	-647	[173,528,198,555]	200.7	0.9621	0.7601	2386	9	1	9027	9587	15683	3144	1137360	9	8
Male	Control	TRUE	A	5	1	0	0	37	9	894	719	2148	-753	[879,708,911,732]	220.8	0.8508	0.6175	2010	10	1	5243	5257	9286	2568	954244	10	9
Male	Control	TRUE	A	5	1	0	0	37	10	1043	773	2236	-785	[1028,760,1059,786]	215.5	0.9604	0.6544	1632	11	1	4098	4419	6644	1442	848359	11	10
Male	Control	TRUE	A	5	1	0	0	37	11	145	360	1704	-539	[129,346,163,374]	252.4	0.997	0.7361	1414	16	1	3642	3548	5902	2270	648334	15	11
Male	Control	TRUE	A	5	1	0	0	37	12	208	861	1745	-837	[193,848,238,874]	324.9	0.8867	0.5181	1221	17	1	4016	3881	8255	1740	847465	16	12
Male	Control	TRUE	A	5	1	0	0	37	13	636	964	1996	-898	[621,949,657,980]	323.8	0.9568	0.7865	1511	18	1	2080	2155	2832	1033	1204290	17	13
Male	Control	TRUE	A	5	1	0	0	38	1	1002	377	1565	-551	[988,366,1013,393]	193.4	0.9409	0.6667	1995	2	1	6118	6556	12079	2182	929978	2	1
Male	Control	TRUE	A	5	1	0	0	38	2	518	591	1279	-676	[507,577,529,603]	156.1	0.9886	0.7249	3248	6	1	9484	10182	15511	3220	1251880	5	2
Male	Control	TRUE	A	5	1	0	0	38	3	707	589	1392	-677	[696,582,720,606]	119.5	0.8117	0.3771	3622	7	1	7894	8015	14466	3468	1894480	6	3
Male	Control	TRUE	A	5	1	0	0	38	4	282	599	1140	-683	[272,589,294,617]	175.4	0.9151	0.5814	2369	8	1	6608	6338	13173	2747	978007	7	4
Male	Control	TRUE	A	5	1	0	0	38	5	130	645	1049	-709	[119,634,141,657]	157.9	0.9782	0.8303	1916	11	1	6122	5542	11146	2620	642812	10	5
Male	Control	TRUE	A	5	1	0	0	38	6	1008	767	1570	-781	[998,757,1019,779]	141	0.9813	0.8218	2870	14	1	6505	7072	10657	2150	1040780	12	6
Male	Control	TRUE	A	5	1	0	0	38	7	556	802	1302	-802	[544,789,568,817]	205.3	0.9607	0.8	1767	15	1	3897	3759	6247	1922	830036	13	7
Male	Control	TRUE	A	5	1	0	0	38	8	520	944	1279	-888	[501,928,531,967]	246.5	0.7428	0.4669	1670	18	1	4740	4576	7315	3143	469223	16	9
Male	Control	TRUE	A	5	1	0	0	38	9	297	1013	1148	-927	[280,1001,315,1025]	206	0.872	0.4598	1046	20	1	2885	2715	5636	1218	444230	18	10
Male	Control	TRUE	A	5	1	0	0	38	10	956	499	1539	-622	[943,487,972,512]	208.8	0.9704	0.7644	1435	23	1	4098	4006	7626	1540	700803	21	11
Male	Control	TRUE	A	5	1	0	0	39	1	648	21	710	-339	[638,11,659,32]	127.6	1.017	0.8182	2019	2	1	5080	4797	9315	2711	518158	2	2
Male	Control	TRUE	A	5	1	0	0	39	2	142	73	411	-369	[129,61,156,86]	200	0.9746	0.7113	1163	3	1	3215	3174	5578	1278	520795	3	3
Male	Control	TRUE	A	5	1	0	0	39	3	205	258	448	-480	[194,246,217,275]	182.8	0.9675	0.7133	1441	4	1	3931	4198	6697	1405	613204	4	4
Male	Control	TRUE	A	5	1	0	0	39	4	848	336	830	-525	[837,327,861,345]	134.3	0.936	0.7442	1905	5	1	4938	4500	9954	2797	488868	5	5
Male	Control	TRUE	A	5	1	0	0	39	5	489	362	616	-541	[478,351,502,375]	153.6	0.9625	0.6012	1807	6	1	2986	2799	6709	1421	668918	6	6
Male	Control	TRUE	A	5	1	0	0	39	6	260	399	482	-563	[246,387,280,411]	197.9	0.7759	0.5258	1966	8	1	8481	8127	16410	3820	729386	8	7
Male	Control	TRUE	A	5	1	0	0	39	7	519	428	634	-580	[508,417,530,440]	151.2	1.023	0.8785	2144	9	1	6204	5720	11680	2959	607972	9	8
Male	Control	TRUE	A	5	1	0	0	39	8	58	513	361	-631	[43,503,77,524]	191.6	0.9086	0.5466	1521	10	1	4356	4063	7587	2355	636024	10	9
Male	Control	TRUE	A	5	1	0	0	39	9	818	804	811	-803	[804,792,832,817]	197.6	0.9531	0.6723	1766	12	1	5752	5943	10176	2042	822486	12	10
Male	Control	TRUE	A	5	1	0	0	39	10	849	812	829	-808	[837,802,859,826]	131.8	0.9256	0.5515	1695	13	1	5340	4522	10629	2950	464575	13	11
Male	Control	TRUE	A	5	1	0	0	39	11	257	828	479	-817	[243,814,272,843]	236.6	0.973	0.7496	2865	14	1	8444	8591	16360	2854	1621310	14	12
Male	Control	TRUE	A	5	1	0	0	39	12	442	867	588	-840	[432,852,451,881]	157.5	0.9289	0.6149	2863	15	1	7260	7898	12490	2448	1132610	15	13
Male	Control	TRUE	A	5	1	0	0	39	13	47	945	353	-887	[32,927,59,963]	255.9	0.9411	0.6576	1646	16	1	3993	3776	8356	1390	1034090	16	14
Male	Control	TRUE	A	5	1	0	0	39	14	589	1020	676	-930	[580,1007,599,1029]	117.4	0.9299	0.6391	2333	17	1	6215	5536	12715	3513	565563	17	15
Male	Control	TRUE	A	5	1	0	0	39	15	605	347	685	-532	[589,333,621,366]	297.8	0.9005	0.7376	1385	19	1	3480	3652	5306	2000	299247	18	16
Male	Control	TRUE	A	5	1	0	0	40	1	336	116	-119	-395	[327,106,350,126]	125.9	0.9697	0.62	1263	2	1	2559	2688	4303	1531	284071	2	1
Male	Control	TRUE	A	5	1	0	0	41	1	338	386	-763	-555	[327,374,357,399]	209.9	0.9592	0.6778	1698	1	1	6511	5647	13204	3582	631587	1	1
Male	Control	TRUE	A	5	1	0	0	41	2	597	421	-613	-575	[582,406,609,433]	230.3	0.8615	0.6481	1936	2	1	5279	5521	8784	2137	966087	2	2
Male	Control	TRUE	A	5	1	0	0	41	3	336	698	-767	-740	[312,686,354,712]	291.8	0.8898	0.5475	3070	4	1	9065	8966	15405	4521	1396000	4	3
Male	Control	TRUE	A	5	1	0	0	42	1	837	86	-1116	-377	[821,71,854,103]	280.9	0.9571	0.7466	1562	3	1	5147	5251	10523	2030	931602	2	1
Male	Control	TRUE	A	5	1	0	0	42	2	66	233	-1573	-464	[52,224,77,242]	136.1	0.9266	0.6601	2272	6	1	6005	5252	11563	2800	678572	5	2
Male	Control	TRUE	A	5	1	0	0	42	3	750	375	-1163	-549	[735,363,777,390]	297.4	0.9103	0.572	2282	9	1	5574	5769	9915	2133	1638860	8	3
Male	Control	TRUE	A	5	1	0	0	42	4	664	384	-1219	-554	[646,372,683,398]	258.4	0.8676	0.5896	3456	10	1	8123	8067	15770	3034	2176900	9	4
Male	Control	TRUE	A	5	1	0	0	42	5	434	399	-1354	-564	[423,389,445,416]	174.4	0.9557	0.6732	1133	11	1	2991	2633	5891	1770	361943	10	5
Male	Control	TRUE	A	5	1	0	0	42	6	491	432	-1321	-582	[479,422,501,442]	120.9	0.9467	0.6832	1680	12	1	4572	4322	8295	1980	470925	11	6
Male	Control	TRUE	A	5	1	0	0	42	7	953	496	-1046	-621	[942,485,964,511]	162.8	0.9474	0.7241	1986	15	1	4387	4246	7769	2230	697536	14	7
Male	Control	TRUE	A	5	1	0	0	42	8	527	530	-1300	-644	[512,519,537,553]	214.1	0.9046	0.5131	2508	16	1	6629	5875	12824	3115	583366	15	8
Male	Control	TRUE	A	5	1	0	0	42	9	108	553	-1544	-653	[98,536,130,563]	195.1	0.7997	0.4472	1233	18	1	3813	3601	8160	1809	789274	17	9
Male	Control	TRUE	A	5	1	0	0	42	10	790	596	-1143	-679	[778,583,802,608]	169.5	0.9865	0.7921	1075	19	1	2914	2989	4846	1362	329323	18	10
Male	Control	TRUE	A	5	1	0	0	42	11	433	639	-1356	-703	[420,612,442,659]	275.3	0.786	0.3832	2752	20	1	8795	9011	13094	5030	993850	19	11
Male	Control	TRUE	A	5	1	0	0	42	12	631	655	-1235	-714	[619,644,649,667]	191.3	0.9784	0.645	2871	21	1	6860	6968	13374	2414	1378780	20	12
Male	Control	TRUE	A	5	1	0	0	42	13	1048	681	-990	-731	[1035,668,1062,697]	213.8	0.9984	0.7729	1453	22	1	3905	3402	7032	2326	562320	21	13
Male	Control	TRUE	A	5	1	0	0	42	14	626	755	-1241	-780	[612,745,637,786]	271.8	0.8529	0.4808	2663	23	1	7227	7332	12134	2636	953963	22	14
Male	Control	TRUE	A	5	1	0	0	42	15	1021	948	-1006	-888	[1009,934,1035,962]	189.5	0.916	0.5924	2119	25	1	4729	4289	8625	2320	893841	24	15
Male	Control	TRUE	A	5	1	0	0	42	16	994	977	-1021	-905	[982,964,1010,991]	204.6	0.9449	0.7252	1460	27	1	4946	4393	10731	1976	643032	26	16
Male	Control	TRUE	A	5	1	0	0	42	17	202	1048	-1492	-947	[177,1034,221,1062]	324.9	0.8772	0.595	950.6	31	1	2323	2331	4024	1114	608631	28	17
Male	Control	TRUE	A	5	1	0	0	43	1	685	85	-1851	-377	[674,72,697,98]	187	0.9364	0.742	2017	2	1	2866	2881	3416	2284	338170	1	1
Male	Control	TRUE	A	5	1	0	0	43	2	259	93	-2103	-382	[250,85,272,107]	118.8	0.8848	0.5769	1808	3	1	3885	3927	5606	2422	403990	2	2
Male	Control	TRUE	A	5	1	0	0	43	3	271	118	-2097	-397	[252,102,285,135]	258.4	0.9712	0.5607	1715	4	1	5892	5659	9942	2742	860247	3	3
Male	Control	TRUE	A	5	1	0	0	43	4	692	314	-1847	-513	[678,295,704,332]	255.9	0.8524	0.5162	2244	7	1	5282	5318	8726	2495	1214950	6	4
Male	Control	TRUE	A	5	1	0	0	43	5	774	371	-1798	-547	[763,360,786,385]	163.1	0.9975	0.8043	1705	8	1	4940	4773	9227	2210	612540	7	5
Male	Control	TRUE	A	5	1	0	0	43	6	138	516	-2171	-632	[127,504,165,527]	241.2	0.8427	0.5098	2045	10	1	6881	6792	14747	2709	1087190	9	6
Male	Control	TRUE	A	5	1	0	0	43	7	313	614	-2072	-690	[294,601,327,628]	241.9	0.922	0.6819	1464	11	1	3345	3431	5113	1504	772693	10	7
Male	Control	TRUE	A	5	1	0	0	43	8	317	767	-2071	-780	[297,749,331,782]	280.2	0.7088	0.5475	3046	13	1	6848	6750	10535	4673	1492920	12	8
Male	Control	TRUE	A	5	1	0	0	43	9	862	918	-1746	-871	[849,908,874,928]	142.4	0.9357	0.6933	1829	14	1	5615	5842	8689	2263	595195	13	9
Male	Control	TRUE	A	5	1	0	0	43	10	191	926	-2144	-876	[180,916,202,938]	142.4	0.9695	0.8638	2613	15	1	7372	6581	14372	3706	722490	14	10
Male	Control	TRUE	A	5	1	0	0	43	11	985	997	-1672	-916	[973,982,1004,1010]	229.9	0.9437	0.6404	3060	16	1	10702	10452	20258	5452	1573220	15	11
Male	Control	TRUE	A	5	1	0	0	43	12	50	1005	-2227	-921	[38,993,62,1015]	145.6	0.9823	0.7794	1851	17	1	4139	4011	7897	1872	596078	16	12
Male	Control	TRUE	A	5	1	0	0	44	1	217	31	-2774	-346	[208,22,227,45]	130.1	0.9705	0.771	2139	1	1	4565	4350	9024	1750	693852	1	1
Male	Control	TRUE	A	5	1	0	0	44	2	237	87	-2761	-378	[228,79,253,96]	122.7	0.9193	0.6076	4320	3	1	7524	7223	13634	3470	1331780	3	2
Male	Control	TRUE	A	5	1	0	0	44	3	477	158	-2620	-421	[466,147,488,172]	159.3	0.9834	0.8178	1303	4	1	3405	3524	6014	1550	428990	4	3
Male	Control	TRUE	A	5	1	0	0	44	4	621	195	-2533	-444	[610,184,634,219]	195.5	0.8222	0.5522	2235	5	1	5318	4909	9717	3540	563713	5	4
Male	Control	TRUE	A	5	1	0	0	44	5	595	221	-2549	-453	[581,190,615,235]	354.4	0.7372	0.4167	1920	6	1	6530	6492	11596	3098	835837	6	5
Male	Control	TRUE	A	5	1	0	0	44	6	862	236	-2393	-465	[851,223,872,246]	143.1	0.9385	0.7202	2435	8	1	4082	3706	7420	1878	853124	8	6
Male	Control	TRUE	A	5	1	0	0	44	7	264	270	-2747	-486	[246,251,278,288]	302	0.9185	0.5802	2785	9	1	9145	8823	15963	3198	2039350	9	7
Male	Control	TRUE	A	5	1	0	0	44	8	670	331	-2504	-522	[662,323,685,339]	107.6	0.8988	0.6218	2468	10	1	5692	5392	9613	2713	614746	10	8
Male	Control	TRUE	A	5	1	0	0	44	9	768	348	-2448	-532	[754,336,780,361]	177.2	0.8798	0.6923	1216	11	1	3646	3387	6367	2009	339048	11	9
Male	Control	TRUE	A	5	1	0	0	44	10	411	596	-2660	-680	[400,584,421,609]	155.7	0.9704	0.7142	2825	14	1	7639	7606	12426	2767	1084720	13	10
Male	Control	TRUE	A	5	1	0	0	44	11	300	604	-2727	-685	[279,592,313,618]	212.7	0.8653	0.5439	3426	15	1	8131	7591	14861	4500	1317190	14	11
Male	Control	TRUE	A	5	1	0	0	44	12	194	764	-2787	-779	[184,754,208,775]	150.1	0.9024	0.7155	1858	17	1	4184	4316	6044	2149	644336	16	12
Male	Control	TRUE	A	5	1	0	0	44	13	776	873	-2443	-845	[766,855,786,896]	248.6	0.8477	0.4794	925.3	19	1	2490	2396	4726	1135	473119	18	13
Male	Control	TRUE	A	5	1	0	0	44	14	689	625	-2495	-698	[674,612,703,643]	232.7	0.977	0.6471	3849	21	1	12407	12467	24491	4645	2134040	19	14
Male	Control	TRUE	A	5	1	0	0	45	1	966	24	-1685	-987	[958,14,976,39]	112.5	0.8717	0.5988	1384	1	1	3525	3769	5837	1306	761366	1	1
Male	Control	TRUE	A	5	1	0	0	45	2	972	43	-1681	-996	[960,29,982,53]	123.4	0.9583	0.64	1357	2	1	3525	3769	5837	1306	761366	2	2
Male	Control	TRUE	A	5	1	0	0	45	3	801	47	-1783	-1001	[788,40,809,60]	100.6	0.8977	0.6215	1518	3	1	2687	2782	4196	1397	612696	3	3
Male	Control	TRUE	A	5	1	0	0	45	4	793	64	-1787	-1009	[785,52,806,72]	103.4	0.8597	0.5833	1314	4	1	2687	2782	4196	1397	612696	4	4
Male	Control	TRUE	A	5	1	0	0	45	5	32	220	-2238	-1102	[21,209,42,231]	128	0.961	0.7474	1713	5	1	2993	3034	5429	1059	559766	5	5
Male	Control	TRUE	A	5	1	0	0	45	6	126	444	-2182	-1236	[117,435,136,457]	124.1	0.9616	0.7537	2039	7	1	5570	4894	11343	2826	479007	7	6
Male	Control	TRUE	A	5	1	0	0	45	7	478	490	-1974	-1262	[466,479,490,502]	165.9	0.885	0.6638	3126	8	1	6945	7112	12602	2805	1270920	8	7
Male	Control	TRUE	A	5	1	0	0	45	8	1004	820	-1662	-1459	[991,807,1017,834]	201.5	0.9362	0.6925	959.3	11	1	2143	2085	3023	1650	197144	11	8
Male	Control	TRUE	A	5	1	0	0	45	9	659	835	-1866	-1468	[646,821,673,852]	239.8	1.008	0.7925	1808	12	1	5074	5100	8808	1918	999491	12	9
Male	Control	TRUE	A	5	1	0	0	45	10	860	1043	-1745	-1591	[847,1030,882,1060]	255.2	0.9045	0.6114	1135	14	1	3526	3501	6457	1499	571131	14	10
Male	Control	TRUE	A	5	1	0	0	46	1	624	205	-1243	-1093	[603,191,639,218]	277	0.8936	0.6162	3136	2	1	8989	9476	14287	2995	2166370	2	1
Male	Control	TRUE	A	5	1	0	0	46	2	258	456	-1459	-1242	[247,441,266,471]	138.9	0.8192	0.4272	1198	4	1	3969	3766	7167	1887	662858	4	2
Male	Control	TRUE	A	5	1	0	0	46	3	261	471	-1458	-1253	[248,462,269,484]	107.2	0.8795	0.5783	1525	5	1	3969	3766	7167	1887	662858	5	3
Male	Control	TRUE	A	5	1	0	0	46	4	225	660	-1477	-1363	[213,648,241,672]	197.2	0.9812	0.7546	1869	6	1	5958	5326	11475	2454	816303	6	4
Male	Control	TRUE	A	5	1	0	0	46	5	779	727	-1149	-1403	[767,716,792,739]	160.3	0.9545	0.6822	1270	7	1	4020	3685	8227	2051	438219	7	5
Male	Control	TRUE	A	5	1	0	0	46	6	740	835	-1173	-1467	[729,822,751,847]	168.8	0.9524	0.7565	1781	8	1	3169	3237	5783	1505	703587	8	6
Male	Control	TRUE	A	5	1	0	0	46	7	957	936	-1043	-1527	[947,926,969,946]	135.4	0.9755	0.8105	2703	9	1	6811	7142	11074	3515	749256	9	7
Male	Control	TRUE	A	5	1	0	0	46	8	18	1035	-1601	-1586	[5,1022,31,1053]	230.6	0.9855	0.7625	1752	10	1	6265	6258	11520	2433	877169	10	8
Male	Control	TRUE	A	5	1	0	0	47	1	729	31	-533	-991	[718,16,740,48]	204.6	0.9449	0.6757	1432	1	1	3010	2820	6747	1126	695257	1	1
Male	Control	TRUE	A	5	1	0	0	47	2	766	32	-512	-990	[755,22,776,42]	125.2	0.9854	0.7164	2345	2	1	4333	4315	7229	1660	697550	2	2
Male	Control	TRUE	A	5	1	0	0	47	3	675	91	-564	-1029	[662,75,692,117]	312.5	0.9161	0.575	1706	3	1	4131	4031	6749	2761	1049210	3	3
Male	Control	TRUE	A	5	1	0	0	47	4	843	117	-466	-1040	[830,91,855,139]	325.2	0.8685	0.4541	1151	4	1	5039	5185	8365	1913	775943	4	4
Male	Control	TRUE	A	5	1	0	0	47	5	317	232	-779	-1109	[306,216,327,244]	175.4	0.9151	0.663	1707	5	1	5153	5016	9930	2630	571939	5	5
Male	Control	TRUE	A	5	1	0	0	47	6	1010	372	-367	-1193	[1000,362,1020,384]	136.1	0.997	0.7938	3031	7	1	7762	7676	14835	2957	993553	7	6
Male	Control	TRUE	A	5	1	0	0	47	7	632	399	-591	-1209	[623,386,642,412]	145.6	0.9318	0.6685	1360	8	1	4612	4613	7821	2327	405840	8	7
Male	Control	TRUE	A	5	1	0	0	47	8	578	408	-623	-1214	[560,396,592,421]	208.1	0.8895	0.6307	1926	9	1	6360	6000	10259	2796	826738	9	8
Male	Control	TRUE	A	5	1	0	0	47	9	84	563	-916	-1307	[74,553,94,579]	156.8	0.9419	0.7166	3292	10	1	8951	9025	16045	5200	1199440	10	9
Male	Control	TRUE	A	5	1	0	0	47	10	600	627	-610	-1345	[584,614,614,644]	223.2	1.009	0.6598	1550	11	1	3932	3777	6298	1980	609393	11	10
Male	Control	TRUE	A	5	1	0	0	47	11	858	680	-457	-1374	[848,665,868,691]	145.9	0.9173	0.6491	3061	12	1	7336	7181	12338	2772	1100360	12	11
Male	Control	TRUE	A	5	1	0	0	47	12	684	764	-559	-1425	[675,755,696,774]	112.2	0.9406	0.7706	3264	13	1	7712	7530	13713	3027	879143	13	12
Male	Control	TRUE	A	5	1	0	0	47	13	130	786	-889	-1437	[112,765,149,799]	291.1	0.7874	0.5811	1708	14	1	4302	4672	6337	1969	1707960	14	13
Male	Control	TRUE	A	5	1	0	0	47	14	149	779	-877	-1433	[139,767,163,788]	122	0.8669	0.4354	2054	15	1	4302	4672	6337	1969	1707960	15	14
Male	Control	TRUE	A	5	1	0	0	47	15	804	951	-488	-1535	[792,940,818,963]	170.2	0.9571	0.7495	1917	16	1	5911	5600	11776	2852	679750	16	15
Male	Control	TRUE	A	5	1	0	0	47	16	235	962	-827	-1543	[224,953,244,975]	121.3	0.9669	0.6819	3844	17	1	8114	8047	14136	3414	1103460	17	16
Male	Control	TRUE	A	5	1	0	0	47	17	668	1016	-569	-1574	[657,1005,681,1027]	166.3	0.9441	0.8123	2109	19	1	4601	4807	8108	1794	846556	19	17
Male	Control	TRUE	A	5	1	0	0	47	18	560	1029	-633	-1582	[550,1019,572,1040]	140.3	1.015	0.8458	2325	20	1	4875	4919	8530	1888	799442	20	18
Male	Control	TRUE	A	5	1	0	0	47	19	114	30	-898	-990	[99,15,131,47]	287.2	0.9941	0.8762	1201	21	1	4102	3792	9820	2067	689188	21	19
Male	Control	TRUE	A	5	1	0	0	47	20	351	431	-757	-1227	[338,419,366,443]	192	0.9958	0.7955	2141	22	1	7286	6326	15539	2836	925283	22	20
Male	Control	TRUE	A	5	1	0	0	47	21	232	1003	-828	-1566	[218,990,247,1016]	224.3	0.956	0.8033	1571	23	1	4729	5013	7642	1747	794416	23	21
Male	Control	TRUE	A	5	1	0	0	48	1	197	204	-203	-1092	[185,184,210,221]	267.5	0.9186	0.6222	664.3	1	1	2011	1840	3673	1025	289514	1	1
Male	Control	TRUE	A	5	1	0	0	48	2	428	242	-66	-1115	[414,227,443,257]	219	0.9696	0.7735	2010	2	1	3622	3669	6534	1608	1075650	2	2
Male	Control	TRUE	A	5	1	0	0	48	3	512	586	-16	-1320	[497,572,525,602]	208.8	0.9294	0.5645	3114	7	1	9546	9307	19251	4422	1508320	7	3
Male	Control	TRUE	A	5	1	0	0	48	4	391	594	-88	-1325	[378,581,406,609]	227.8	0.9923	0.9106	1885	8	1	5276	4911	10815	2264	912757	8	4
Male	Control	TRUE	A	5	1	0	0	48	5	738	600	120	-1328	[727,588,761,612]	209.9	0.8818	0.5992	2452	9	1	8229	8397	17778	3012	1234340	9	5
Male	Control	TRUE	A	5	1	0	0	48	6	889	602	207	-1330	[877,588,900,620]	190.2	0.9458	0.5752	2112	10	1	5114	4870	9404	2004	951199	10	6
Male	Control	TRUE	A	5	1	0	0	48	7	129	822	-243	-1459	[118,810,141,834]	154	1.016	0.7257	1218	12	1	2359	2462	3617	1333	344388	12	7
Male	Control	TRUE	A	5	1	0	0	48	8	358	840	-107	-1470	[346,828,371,852]	181.1	0.993	0.7966	1937	13	1	6881	6114	13940	3213	619312	13	8
Male	Control	TRUE	A	5	1	0	0	48	9	34	944	-299	-1532	[23,933,45,956]	138.5	0.9891	0.7155	2135	15	1	5109	5062	10547	1864	715299	15	9
Male	Control	TRUE	A	5	1	0	0	48	10	722	992	107	-1562	[707,976,735,1015]	273.5	0.9422	0.5883	1624	17	1	4961	5090	8222	2273	803650	17	10
Male	Control	TRUE	A	5	1	0	0	48	11	275	992	-157	-1561	[263,977,287,1011]	215.5	0.9469	0.5668	3315	18	1	8720	8961	15059	2964	1813700	18	11
Male	Control	TRUE	A	5	1	0	0	48	12	782	1028	144	-1582	[771,1017,795,1042]	183.2	0.9536	0.718	1860	19	1	4967	4900	9005	1984	789815	19	12
Male	Control	TRUE	A	5	1	0	0	49	1	659	150	717	-1063	[647,138,673,170]	217.6	0.9391	0.5968	1994	1	1	6642	7044	10989	2368	1009650	1	1
Male	Control	TRUE	A	5	1	0	0	49	2	944	222	887	-1103	[933,212,961,233]	161	0.957	0.67	1720	3	1	4157	3970	8255	1625	656781	3	2
Male	Control	TRUE	A	5	1	0	0	49	3	715	319	750	-1161	[706,309,724,329]	106.9	0.9133	0.6385	2663	4	1	7379	7130	13604	2969	686254	4	3
Male	Control	TRUE	A	5	1	0	0	49	4	97	339	385	-1173	[83,325,112,357]	227.5	0.8889	0.6366	1789	5	1	6596	6502	11261	3289	573835	5	4
Male	Control	TRUE	A	5	1	0	0	49	5	932	448	879	-1238	[921,439,943,458]	122	0.9703	0.6914	2236	6	1	7084	6071	14868	2917	616308	6	5
Male	Control	TRUE	A	5	1	0	0	49	6	478	596	609	-1325	[468,584,488,608]	138.9	0.955	0.8086	2323	9	1	7236	7629	11727	2749	752526	9	6
Male	Control	TRUE	A	5	1	0	0	49	7	748	657	768	-1363	[726,644,766,678]	321.7	0.9111	0.5523	1260	10	1	4474	4634	8507	1708	863389	10	7
Male	Control	TRUE	A	5	1	0	0	49	8	83	904	376	-1508	[70,890,100,917]	217.3	0.9382	0.7511	3204	12	1	7261	7498	12316	2374	1779030	12	8
Male	Control	TRUE	A	5	1	0	0	49	9	581	954	673	-1538	[566,942,606,968]	253.5	0.8475	0.4851	2076	13	1	7172	7034	12620	3370	1197650	13	9
Male	Control	TRUE	A	5	1	0	0	49	10	549	956	652	-1539	[537,944,562,967]	154.7	0.9501	0.7016	1991	14	1	6862	6874	11942	3233	706819	14	10
Male	Control	TRUE	A	5	1	0	0	49	11	89	973	379	-1549	[79,959,102,987]	169.5	0.9547	0.636	1952	15	1	5374	5309	9398	2026	795309	15	11
Male	Control	TRUE	A	5	1	0	0	50	1	567	30	1308	-990	[556,11,577,48]	212.7	0.8653	0.5203	1350	1	1	3539	3384	6777	1483	619324	1	1
Male	Control	TRUE	A	5	1	0	0	50	2	137	34	1054	-993	[124,22,154,54]	232.4	0.7581	0.5489	1849	2	1	5057	5288	8392	1993	945655	2	2
Male	Control	TRUE	A	5	1	0	0	50	3	917	234	1516	-1111	[905,218,932,252]	203.9	0.9034	0.4905	2418	4	1	6234	6292	9343	3078	1178240	4	3
Male	Control	TRUE	A	5	1	0	0	50	4	479	495	1256	-1265	[463,483,490,510]	158.9	0.8896	0.5647	2799	7	1	5558	5894	9692	1814	2200910	7	4
Male	Control	TRUE	A	5	1	0	0	50	5	469	507	1251	-1273	[457,493,485,522]	149.8	0.8864	0.4333	2703	8	1	5558	5894	9692	1814	2200910	8	5
Male	Control	TRUE	A	5	1	0	0	50	6	701	518	1389	-1278	[689,504,718,531]	232	0.9488	0.7726	1254	9	1	5726	5644	10526	2579	515357	9	6
Male	Control	TRUE	A	5	1	0	0	50	7	1019	556	1576	-1302	[1008,545,1029,569]	146.6	0.9865	0.8003	2126	11	1	3890	3690	6885	2518	641831	11	7
Male	Control	TRUE	A	5	1	0	0	50	8	950	583	1534	-1317	[933,568,962,595]	199	0.9294	0.6081	1632	12	1	5685	5553	9302	2714	636756	12	8
Male	Control	TRUE	A	5	1	0	0	50	9	653	706	1358	-1391	[634,694,666,719]	208.1	0.9408	0.6651	2135	16	1	6465	6016	12315	2482	1027950	16	9
Male	Control	TRUE	A	5	1	0	0	50	10	712	811	1393	-1453	[699,800,722,822]	132.9	0.9648	0.6672	1837	18	1	2850	2824	6195	1412	598534	18	10
Male	Control	TRUE	A	5	1	0	0	50	11	331	843	1169	-1471	[317,829,350,857]	266.8	0.9896	0.754	2930	21	1	8125	8411	13061	2726	1941820	21	11
Male	Control	TRUE	A	5	1	0	0	50	12	572	913	1310	-1514	[558,901,584,930]	206.4	0.9228	0.6812	3526	22	1	8308	8348	13096	5530	888940	22	12
Male	Control	TRUE	A	5	1	0	0	50	13	668	929	1367	-1523	[655,921,680,937]	110.7	0.8633	0.5751	1770	23	1	3605	3691	5596	1751	904807	23	13
Male	Control	TRUE	A	5	1	0	0	50	14	55	1059	1008	-1600	[47,1052,74,1067]	124.1	0.8761	0.5153	3141	25	1	7695	8320	12825	2826	938737	25	15
Male	Control	TRUE	A	5	1	0	0	52	1	436	106	1876	-1680	[422,92,449,119]	200.7	1.022	0.8525	2210	3	1	4403	4406	10921	1626	1105220	2	1
Male	Control	TRUE	A	5	1	0	0	52	2	44	229	1645	-1753	[31,214,60,242]	239.4	0.9409	0.7578	1520	4	1	4265	4306	7228	2141	609833	3	2
Male	Control	TRUE	A	5	1	0	0	52	3	506	270	1919	-1778	[488,258,528,283]	284.8	0.9082	0.5547	1816	5	1	5160	5239	9077	2250	1088710	4	3
Male	Control	TRUE	A	5	1	0	0	52	4	376	586	1841	-1966	[366,568,388,607]	239.4	0.8599	0.4782	1651	6	1	6320	6423	10322	2462	853218	5	4
Male	Control	TRUE	A	5	1	0	0	52	5	234	603	1756	-1976	[223,595,243,615]	113.2	0.9459	0.6938	3801	7	1	7836	8229	13508	2768	1097040	6	5
Male	Control	TRUE	A	5	1	0	0	52	6	344	926	1821	-2168	[329,912,357,942]	219.4	0.9569	0.6645	980.2	11	1	2361	2356	3750	1256	432049	10	7
Male	Control	TRUE	A	5	1	0	0	53	1	75	141	1014	-1705	[58,131,86,164]	210.6	0.9082	0.5495	1616	1	1	5275	5057	9982	2523	738496	1	1
Male	Control	TRUE	A	5	1	0	0	53	2	595	505	1324	-1919	[583,495,606,522]	160.7	0.9719	0.7288	2198	5	1	5880	5739	9639	3853	676165	5	2
Male	Control	TRUE	A	5	1	0	0	53	3	303	528	1151	-1931	[288,516,315,542]	201.5	0.9096	0.6413	2404	6	1	7469	7870	12636	2839	1180050	6	3
Male	Control	TRUE	A	5	1	0	0	53	4	194	726	1088	-2050	[177,710,214,751]	340	0.8915	0.5737	2330	7	1	3750	3752	6152	1916	885035	7	4
Male	Control	TRUE	A	5	1	0	0	53	5	602	797	1330	-2090	[591,787,617,808]	164.5	0.9694	0.7305	2044	9	1	5897	6115	8969	2437	778445	9	5
Male	Control	TRUE	A	5	1	0	0	53	6	607	946	1332	-2179	[594,933,620,960]	214.8	0.9867	0.8746	1890	10	1	4429	4322	8307	1828	841480	10	6
Male	Control	TRUE	A	5	1	0	0	53	7	549	1001	1299	-2211	[537,988,567,1013]	213.1	0.9405	0.6604	1984	11	1	7595	6967	13432	3412	820270	11	7
Male	Control	TRUE	A	5	1	0	0	53	8	1016	1018	1572	-2220	[997,1009,1025,1027]	138.5	0.8889	0.5657	3494	12	1	7332	6960	14433	3407	1092410	12	8
Male	Control	TRUE	A	5	1	0	0	54	1	1022	13	932	-1626	[1011,2,1035,26]	161	0.9413	0.6154	1563	1	1	4918	4727	8112	2028	526177	1	1
Male	Control	TRUE	A	5	1	0	0	54	2	683	72	731	-1661	[668,61,700,86]	197.9	0.9401	0.5592	2022	2	1	7001	6985	11457	2642	882085	2	2
Male	Control	TRUE	A	5	1	0	0	54	3	273	118	489	-1688	[261,111,289,126]	120.9	0.847	0.4277	1211	4	1	3648	3256	7972	1598	667542	4	3
Male	Control	TRUE	A	5	1	0	0	54	4	869	134	845	-1700	[858,122,893,155]	263.3	0.8774	0.5024	2212	5	1	4902	4525	9900	3321	1004850	5	4
Male	Control	TRUE	A	5	1	0	0	54	5	385	327	554	-1812	[373,315,397,340]	169.8	0.9716	0.7674	4171	7	1	4960	4906	9334	2636	500984	7	5
Male	Control	TRUE	A	5	1	0	0	54	6	181	347	433	-1825	[171,338,190,361]	125.5	0.9681	0.7489	3134	8	1	8772	8968	16171	3104	947406	8	6
Male	Control	TRUE	A	5	1	0	0	54	7	711	527	748	-1930	[700,516,722,538]	140.6	0.998	0.8481	3148	10	1	6719	6851	13748	2397	1128750	10	7
Male	Control	TRUE	A	5	1	0	0	54	8	255	557	477	-1949	[242,546,266,570]	181.1	0.962	0.8515	2491	11	1	4194	4298	7668	1501	1165940	11	8
Male	Control	TRUE	A	5	1	0	0	54	9	798	566	799	-1954	[786,554,811,582]	195.1	1.005	0.7902	2525	12	1	7096	6398	15257	3101	1099880	12	9
Male	Control	TRUE	A	5	1	0	0	54	10	794	793	800	-2088	[778,785,819,801]	191.6	0.7704	0.3688	1654	14	1	4275	4187	7950	1640	735338	14	10
Male	Control	TRUE	A	5	1	0	0	54	11	284	798	495	-2091	[272,789,299,808]	144.5	0.944	0.6223	2882	15	1	6865	7001	11652	2804	961165	15	11
Male	Control	TRUE	A	5	1	0	0	54	12	32	859	345	-2128	[14,849,52,870]	233.1	0.8569	0.5124	1306	16	1	4126	4093	6791	2081	680848	16	12
Male	Control	TRUE	A	5	1	0	0	55	1	192	222	-202	-1751	[179,214,216,233]	184.2	0.8149	0.4184	2161	1	1	6623	6412	11220	2972	761620	1	1
Male	Control	TRUE	A	5	1	0	0	55	2	331	341	-124	-1820	[313,330,346,352]	190.2	0.9458	0.5992	1470	2	1	4905	4356	9474	2691	564079	2	2
Male	Control	TRUE	A	5	1	0	0	55	3	496	594	-26	-1971	[485,584,504,609]	120.9	0.8944	0.5974	1161	6	1	5173	4728	9553	2770	853521	6	3
Male	Control	TRUE	A	5	1	0	0	55	4	154	854	-229	-2125	[145,845,164,866]	116.4	1.002	0.8242	2493	10	1	6624	6121	12512	3372	596186	10	4
Male	Control	TRUE	A	5	1	0	0	56	1	608	69	-605	-1660	[597,57,620,85]	180.7	0.9762	0.7463	2348	2	1	6830	6805	11214	3026	812784	2	1
Male	Control	TRUE	A	5	1	0	0	56	2	901	125	-431	-1691	[893,113,910,136]	112.9	0.9441	0.6265	2176	3	1	5683	5993	9354	2250	591042	3	2
Male	Control	TRUE	A	5	1	0	0	56	3	967	284	-392	-1786	[955,272,982,297]	184.2	0.9719	0.6566	1634	6	1	4576	4514	8350	2020	640598	6	3
Male	Control	TRUE	A	5	1	0	0	56	4	439	476	-705	-1900	[424,463,453,489]	197.2	0.9812	0.6106	3275	7	1	7659	7697	13124	3084	1478250	7	4
Male	Control	TRUE	A	5	1	0	0	56	5	854	548	-459	-1942	[843,537,865,560]	154.3	0.9993	0.8254	1960	8	1	4306	4188	8114	1693	723465	8	5
Male	Control	TRUE	A	5	1	0	0	56	6	295	587	-791	-1965	[284,576,307,597]	135.4	0.9577	0.7343	1562	9	1	3477	3219	6403	1807	413745	9	6
Male	Control	TRUE	A	5	1	0	0	56	7	581	686	-621	-2024	[570,672,592,697]	152.2	0.9911	0.7268	3404	14	1	8927	7834	18337	4419	1089080	14	7
Male	Control	TRUE	A	5	1	0	0	56	8	395	716	-735	-2044	[374,703,406,742]	212	0.6841	0.3559	2011	15	1	5381	5264	8105	3103	489648	15	8
Male	Control	TRUE	A	5	1	0	0	56	9	240	1022	-823	-2224	[230,1011,253,1036]	158.6	0.9808	0.7276	2433	17	1	3405	3422	5430	1615	561886	17	9
Male	Control	TRUE	A	5	1	0	0	56	10	399	279	-729	-1783	[386,258,412,297]	280.2	0.944	0.6111	1528	19	1	4327	4112	7467	2113	887115	19	11
Male	Control	TRUE	A	5	1	0	0	57	1	92	255	-1557	-1769	[80,244,103,266]	148	0.9747	0.7845	2300	2	1	4775	4582	8459	2837	692394	2	1
Male	Control	TRUE	A	5	1	0	0	57	2	736	300	-1175	-1795	[726,289,748,312]	144.8	0.8979	0.6771	1463	3	1	5376	5600	8344	1903	494546	3	2
Male	Control	TRUE	A	5	1	0	0	57	3	713	757	-1189	-2068	[702,745,724,776]	192.7	0.9389	0.607	1630	5	1	3551	3537	6069	1952	575299	5	3
Male	Control	TRUE	A	5	1	0	0	57	4	1059	826	-984	-2108	[1050,817,1069,838]	117.4	0.9867	0.7938	2203	7	1	7307	7523	11733	2699	628419	7	4
Male	Control	TRUE	A	5	1	0	0	57	5	647	938	-1224	-2174	[636,927,677,950]	226.4	0.7548	0.4778	3122	9	1	8144	8283	15844	3383	1001710	9	5
Male	Control	TRUE	A	5	1	0	0	58	1	961	42	-1690	-1643	[941,32,973,53]	187	0.8826	0.5335	836.9	1	1	2087	1999	3652	1014	302586	1	1
Male	Control	TRUE	A	5	1	0	0	58	2	738	55	-1818	-1651	[728,45,752,66]	151.2	1.005	0.7945	2218	2	1	4342	4518	7145	1682	816277	2	2
Male	Control	TRUE	A	5	1	0	0	58	3	214	72	-2131	-1660	[195,60,231,84]	224.3	0.8815	0.5245	2084	3	1	7229	7335	12206	2647	1098790	3	3
Male	Control	TRUE	A	5	1	0	0	58	4	295	112	-2082	-1684	[282,100,310,126]	200.7	0.9208	0.7093	2401	6	1	7014	7273	11475	2625	1101220	6	4
Male	Control	TRUE	A	5	1	0	0	58	5	620	359	-1889	-1830	[610,349,631,368]	119.2	0.9204	0.6813	2053	9	1	4633	4154	9619	2003	556000	9	5
Male	Control	TRUE	A	5	1	0	0	58	6	640	432	-1878	-1874	[628,419,653,445]	186.7	0.9078	0.7647	2301	10	1	7056	7173	11069	3675	797337	10	6
Male	Control	TRUE	A	5	1	0	0	58	7	978	443	-1677	-1881	[969,433,988,456]	112.9	0.9441	0.7059	1660	11	1	3836	3613	7473	1847	375891	11	7
Male	Control	TRUE	A	5	1	0	0	58	8	549	470	-1931	-1896	[538,459,562,481]	146.6	0.9691	0.6913	2138	12	1	3588	3300	7377	1410	810912	12	8
Male	Control	TRUE	A	5	1	0	0	58	9	434	526	-2001	-1929	[419,516,445,537]	158.6	0.8745	0.5896	1713	13	1	4671	4337	10536	2819	490461	13	9
Male	Control	TRUE	A	5	1	0	0	58	10	714	564	-1834	-1953	[704,552,724,577]	155.4	0.9214	0.7248	1929	15	1	2812	2762	5075	1245	762166	15	10
Male	Control	TRUE	A	5	1	0	0	58	11	466	664	-1981	-2012	[448,653,485,677]	257.4	0.8977	0.5836	3399	17	1	9159	9727	14288	3201	2152480	17	11
Male	Control	TRUE	A	5	1	0	0	58	12	679	883	-1855	-2141	[667,872,690,894]	150.8	0.9202	0.7571	2030	20	1	6223	5933	10667	3730	541395	20	12
Male	Control	TRUE	A	5	1	0	0	58	13	564	957	-1924	-2185	[543,946,581,970]	240.1	0.8722	0.5199	2042	23	1	4934	4640	8534	2145	1189050	22	13
Male	Control	TRUE	A	5	1	0	0	58	14	627	182	-1887	-1726	[610,166,642,201]	310.8	0.979	0.7158	1181	25	1	1932	1912	2458	1598	595053	24	14
Male	Control	TRUE	A	5	1	0	0	59	1	871	41	-450	-2289	[855,30,882,59]	175.8	0.8888	0.5358	1153	1	1	4220	4123	7732	2254	717334	1	1
Male	Control	TRUE	A	5	1	0	0	59	2	309	90	-782	-2317	[298,78,321,105]	175.4	0.9906	0.7254	1233	3	1	2346	2281	3814	1821	382326	3	2
Male	Control	TRUE	A	5	1	0	0	59	3	718	110	-538	-2329	[708,100,735,121]	173.7	0.9847	0.7267	2031	4	1	6018	6246	10050	2106	836471	4	3
Male	Control	TRUE	A	5	1	0	0	59	4	312	236	-782	-2405	[301,227,321,250]	141.7	0.9495	0.6726	1895	5	1	5330	5792	7533	2034	586285	5	4
Male	Control	TRUE	A	5	1	0	0	59	5	676	242	-565	-2407	[661,228,690,257]	247.2	0.9847	0.7712	2981	6	1	7121	7464	11248	2632	1773110	6	5
Male	Control	TRUE	A	5	1	0	0	59	6	24	340	-950	-2465	[13,330,38,351]	152.2	0.9911	0.7766	2653	8	1	6785	6305	13984	2586	970305	8	6
Male	Control	TRUE	A	5	1	0	0	59	7	406	343	-725	-2469	[396,332,416,363]	175.1	0.958	0.6305	3405	9	1	7077	6999	11672	3023	1493240	9	7
Male	Control	TRUE	A	5	1	0	0	59	8	757	387	-517	-2495	[747,375,767,408]	188.4	0.955	0.5831	2745	11	1	5098	4948	10017	2163	1269520	11	8
Male	Control	TRUE	A	5	1	0	0	59	9	706	408	-548	-2505	[696,390,717,421]	182.5	0.8696	0.6078	2256	12	1	5450	5320	8750	3111	604931	12	9
Male	Control	TRUE	A	5	1	0	0	59	10	916	459	-423	-2537	[904,449,927,476]	162.4	0.9308	0.6696	2044	13	1	5330	5808	8424	1956	794109	13	10
Male	Control	TRUE	A	5	1	0	0	59	11	1006	489	-369	-2553	[990,480,1021,499]	161.7	0.9284	0.5463	1454	14	1	4125	4266	5683	2564	391889	14	11
Male	Control	TRUE	A	5	1	0	0	59	12	711	604	-544	-2622	[697,590,724,619]	207.8	1.012	0.701	1809	18	1	4894	4650	8781	1983	866285	18	12
Male	Control	TRUE	A	5	1	0	0	59	13	498	720	-669	-2690	[486,710,514,730]	177.9	0.9228	0.6519	1441	19	1	4009	3955	7765	1841	497168	19	13
Male	Control	TRUE	A	5	1	0	0	59	14	360	989	-752	-2850	[350,979,369,1001]	105.8	0.8724	0.622	1925	22	1	4501	4246	7901	2474	445591	22	16
Male	Control	TRUE	A	5	1	0	0	59	15	352	374	-757	-2486	[339,361,365,390]	215.2	0.9595	0.7861	2231	23	1	6655	6288	11067	4566	705390	23	17
Male	Control	TRUE	A	5	1	0	0	60	1	438	45	-60	-2290	[427,34,452,57]	157.5	0.9939	0.7975	2096	2	1	4473	4820	7080	1559	822946	2	1
Male	Control	TRUE	A	5	1	0	0	60	2	612	173	44	-2366	[600,161,628,185]	199	1.002	0.7511	1298	4	1	2713	2647	5383	1071	613204	4	2
Male	Control	TRUE	A	5	1	0	0	60	3	459	186	-45	-2374	[448,176,482,197]	199	0.9294	0.5823	886.1	5	1	2390	2232	4350	1149	322676	5	3
Male	Control	TRUE	A	5	1	0	0	60	4	149	195	-232	-2380	[134,179,161,210]	209.2	0.9303	0.6033	2039	6	1	6077	6145	11279	2325	1008790	6	4
Male	Control	TRUE	A	5	1	0	0	60	5	429	222	-63	-2395	[414,213,451,232]	188.1	0.8485	0.4608	876.4	7	1	2477	2227	4585	1195	314632	7	5
Male	Control	TRUE	A	5	1	0	0	60	6	937	405	235	-2503	[927,392,945,416]	119.2	0.8545	0.5717	1491	8	1	3798	3952	6321	1473	877307	8	6
Male	Control	TRUE	A	5	1	0	0	60	7	921	402	227	-2504	[913,394,930,419]	122.7	0.8395	0.516	1624	9	1	3798	3952	6321	1473	877307	9	7
Male	Control	TRUE	A	5	1	0	0	60	8	758	419	130	-2513	[749,410,767,432]	119.9	0.9793	0.7452	1907	10	1	3581	3490	5490	2478	422567	10	8
Male	Control	TRUE	A	5	1	0	0	60	9	390	496	-89	-2558	[378,483,402,508]	160.7	0.9719	0.7593	2841	11	1	8010	7578	14307	3276	1049310	11	9
Male	Control	TRUE	A	5	1	0	0	60	10	171	569	-218	-2601	[160,555,182,583]	175.4	0.9591	0.7438	2050	13	1	5498	5374	8539	2835	654271	13	10
Male	Control	TRUE	A	5	1	0	0	60	11	535	636	-2	-2642	[522,623,549,654]	264	0.9228	0.7566	1926	15	1	6803	7094	12027	2609	1081710	15	11
Male	Control	TRUE	A	5	1	0	0	60	12	200	779	-201	-2726	[191,770,212,790]	124.8	0.9648	0.7656	2725	17	1	7903	7192	15090	4050	711270	17	12
Male	Control	TRUE	A	5	1	0	0	60	13	190	820	-208	-2749	[174,808,205,832]	223.6	0.9411	0.6652	1872	18	1	4911	4779	9052	2130	908533	18	13
Male	Control	TRUE	A	5	1	0	0	60	14	1027	931	293	-2815	[1020,924,1047,938]	117.1	0.8607	0.5129	2954	19	1	5561	5357	11024	2324	861898	19	14
Male	Control	TRUE	A	5	1	0	0	60	15	416	993	-74	-2851	[402,978,427,1006]	169.5	0.9247	0.5374	1108	20	1	2530	2273	4520	1242	392079	20	15
Male	Control	TRUE	A	5	1	0	0	60	16	838	1053	177	-2888	[825,1043,849,1064]	143.1	0.9551	0.7466	2182	22	1	5025	4857	8604	2294	733635	22	16
Male	Control	TRUE	A	5	1	0	0	61	1	1045	116	946	-2334	[1034,103,1056,136]	209.5	0.9446	0.6139	1449	4	1	4444	4386	8125	1814	657784	1	1
Male	Control	TRUE	A	5	1	0	0	61	2	546	160	651	-2359	[535,149,560,173]	173.7	0.9847	0.6996	1955	5	1	5785	6029	9454	2402	723148	2	2
Male	Control	TRUE	A	5	1	0	0	61	3	785	167	792	-2363	[775,157,797,180]	135.7	0.9592	0.6879	2498	6	1	6184	6780	9711	2171	840999	3	3
Male	Control	TRUE	A	5	1	0	0	61	4	879	279	847	-2430	[867,268,892,292]	175.8	0.9452	0.7708	1792	8	1	6745	6406	11486	2774	681246	5	4
Male	Control	TRUE	A	5	1	0	0	61	5	644	409	708	-2508	[633,398,654,425]	163.1	0.9486	0.6896	2684	13	1	6274	6269	10795	2404	1072810	10	5
Male	Control	TRUE	A	5	1	0	0	61	6	979	411	907	-2508	[968,400,993,426]	168.4	0.9829	0.6773	2154	14	1	4986	4981	8269	2161	822753	11	6
Male	Control	TRUE	A	5	1	0	0	61	7	334	470	523	-2540	[320,447,346,486]	276	0.8915	0.5247	879	15	1	2140	2077	3502	1324	284644	12	7
Male	Control	TRUE	A	5	1	0	0	61	8	864	745	838	-2706	[850,731,879,760]	240.1	0.9815	0.7782	2043	20	1	6534	6968	11029	2371	1136830	16	8
Male	Control	TRUE	A	5	1	0	0	61	9	687	806	733	-2742	[677,795,698,819]	144.8	0.9622	0.774	1846	21	1	6462	6053	12375	2819	555706	17	9
Male	Control	TRUE	A	5	1	0	0	61	10	645	812	709	-2745	[636,803,657,822]	126.6	0.973	0.8372	3162	22	1	5067	4962	9249	1751	1053880	18	10
Male	Control	TRUE	A	5	1	0	0	61	11	208	898	450	-2797	[199,889,218,909]	111.8	0.9983	0.7933	2492	25	1	6100	5991	10174	2902	646605	21	11
Male	Control	TRUE	A	5	1	0	0	61	12	766	985	780	-2849	[755,963,777,1011]	303.8	0.8339	0.4601	2381	26	1	5985	6343	10578	1947	1843400	22	12
Male	Control	TRUE	A	6	1	0	0	1	1	923	222	228	187	[913,211,935,238]	163.8	0.9832	0.7122	4561	3	1	10050	10835	16443	3234	1929520	3	1
Male	Control	TRUE	A	6	1	0	0	1	2	510	425	-17	68	[494,410,525,441]	237	0.9739	0.6372	2026	4	1	5089	4893	11050	2432	1033140	4	2
Male	Control	TRUE	A	6	1	0	0	1	3	29	469	-298	41	[17,459,59,483]	231.7	0.8538	0.4491	1064	5	1	4058	3889	7462	1604	507194	5	3
Male	Control	TRUE	A	6	1	0	0	1	4	258	684	-167	-87	[247,672,270,700]	190.2	0.9603	0.742	2575	7	1	9726	9934	17872	3443	1099080	7	4
Male	Control	TRUE	A	6	1	0	0	1	5	687	770	88	-137	[672,755,705,786]	285.1	1.015	0.8642	2575	8	1	10177	10731	17753	3534	1780910	8	5
Male	Control	TRUE	A	6	1	0	0	1	6	1004	768	276	-137	[990,754,1020,785]	269.7	0.9957	0.8203	2256	9	1	9200	9570	15712	3098	1435190	9	6
Male	Control	TRUE	A	6	1	0	0	1	7	30	878	-302	-201	[14,863,47,894]	289.3	0.9859	0.854	1863	10	1	5995	5140	12528	3033	1007130	10	7
Male	Control	TRUE	A	6	1	0	0	2	1	729	296	-533	2728	[715,275,744,311]	245	0.9055	0.5409	1644	2	1	6180	6271	11499	2633	871359	2	1
Male	Control	TRUE	A	6	1	0	0	2	2	678	461	-564	2629	[667,451,688,474]	144.8	0.9795	0.786	2274	4	1	5373	5820	9169	1903	816645	4	2
Male	Control	TRUE	A	6	1	0	0	2	3	652	500	-579	2607	[638,489,667,511]	165.9	0.9743	0.6508	1884	6	1	5976	5778	11444	2461	693217	5	3
Male	Control	TRUE	A	6	1	0	0	2	4	118	855	-896	2395	[105,843,131,870]	165.9	0.9131	0.6094	986.8	8	1	2942	2946	5164	1215	347167	7	4
Male	Control	TRUE	A	6	1	0	0	2	5	369	962	-747	2332	[359,953,380,972]	115.7	0.9778	0.7696	2619	12	1	7623	7166	15833	2832	724148	11	5
Male	Control	TRUE	A	6	1	0	0	3	1	898	719	213	2476	[886,707,911,733]	170.2	0.9571	0.6451	1448	3	1	3971	3755	8371	1565	551948	3	1
Male	Control	TRUE	A	6	1	0	0	3	2	410	853	-76	2397	[398,842,425,865]	174.4	0.9712	0.7186	2120	4	1	4449	3714	10143	1847	916493	4	2
Male	Control	TRUE	A	6	1	0	0	3	3	850	859	184	2394	[838,846,863,872]	190.9	0.9624	0.8404	1830	5	1	7448	7395	14076	3518	700095	5	3
Male	Control	TRUE	A	6	1	0	0	4	1	609	17	687	2891	[599,8,619,31]	129.4	1.005	0.7748	2619	2	1	7117	7300	13067	2610	818491	1	1
Male	Control	TRUE	A	6	1	0	0	4	2	73	269	369	2742	[64,261,81,281]	100.2	0.9968	0.7295	3374	4	1	7954	7418	15771	3421	811308	3	2
Male	Control	TRUE	A	6	1	0	0	4	3	540	326	646	2709	[529,311,551,341]	190.9	0.9338	0.6718	2119	5	1	6771	6288	12520	3111	866677	4	3
Male	Control	TRUE	A	6	1	0	0	5	1	750	150	2063	2168	[737,137,765,164]	214.8	0.9724	0.8009	2698	1	1	7008	7388	14116	2629	1436700	1	1
Male	Control	TRUE	A	6	1	0	0	5	2	382	176	1843	2152	[366,164,394,191]	197.6	0.9254	0.5704	3546	2	1	9502	10123	14803	3207	1786380	2	2
Male	Control	TRUE	A	6	1	0	0	5	3	600	288	1974	2086	[590,278,611,301]	135.7	0.977	0.8218	2448	3	1	7171	6640	13380	2846	774506	3	3
Male	Control	TRUE	A	6	1	0	0	5	4	970	632	2193	1883	[957,618,983,645]	207.8	0.9819	0.8472	1813	5	1	6115	5599	14177	2432	837723	5	4
Male	Control	TRUE	A	6	1	0	0	5	5	61	771	1649	1799	[37,762,70,786]	207.1	0.8629	0.5067	1470	6	1	6649	5840	13613	2714	664918	6	5
Male	Control	TRUE	A	6	1	0	0	6	1	351	41	1180	2233	[341,32,361,51]	112.2	1	0.81	2765	1	1	6165	6199	11285	2374	746023	1	1
Male	Control	TRUE	A	6	1	0	0	6	2	727	836	1403	1760	[717,826,738,854]	162.1	0.945	0.6879	1366	5	1	3524	3206	6338	1627	486376	5	2
Male	Control	TRUE	A	6	1	0	0	7	1	787	276	792	2093	[776,265,798,291]	168.1	0.9817	0.7753	2684	1	1	9529	9276	14420	4466	1010060	1	1
Male	Control	TRUE	A	6	1	0	0	7	2	419	527	575	1945	[405,514,433,540]	211.3	0.9771	0.8373	2556	2	1	10144	9050	19839	4444	1115860	2	2
Male	Control	TRUE	A	6	1	0	0	7	3	293	870	500	1741	[283,860,306,880]	132.9	0.93	0.7437	1488	4	1	5022	5209	8479	2159	431870	4	3
Male	Control	TRUE	A	6	1	0	0	7	4	689	937	735	1701	[677,925,704,952]	211.3	0.963	0.745	1289	5	1	4041	4037	7175	1603	581916	5	4
Male	Control	TRUE	A	6	1	0	0	8	1	330	773	-126	1797	[308,755,344,791]	288.6	0.9605	0.5798	2284	2	1	10240	10790	20976	3402	1484810	2	1
Male	Control	TRUE	A	6	1	0	0	8	2	578	796	23	1784	[565,784,592,811]	204.3	0.972	0.7818	2799	3	1	9509	9642	19354	3629	1283680	3	2
Male	Control	TRUE	A	6	1	0	0	9	1	1017	226	-363	2123	[1003,208,1032,242]	276.7	0.937	0.6305	1937	2	1	6857	6799	12148	2657	1193170	2	1
Male	Control	TRUE	A	6	1	0	0	9	2	766	350	-510	2049	[756,340,779,362]	148.4	0.9936	0.8069	2056	3	1	6526	6013	13849	2429	717843	3	2
Male	Control	TRUE	A	6	1	0	0	9	3	1038	486	-350	1968	[1028,476,1049,500]	149.8	0.9319	0.7071	2212	4	1	8217	8129	15018	3634	747766	4	3
Male	Control	TRUE	A	6	1	0	0	9	4	1048	758	-343	1808	[1036,745,1064,773]	221.1	0.935	0.677	1097	5	1	4052	3746	7809	1626	494382	5	4
Male	Control	TRUE	A	6	1	0	0	9	5	356	859	-755	1748	[343,845,369,875]	228.5	0.9666	0.77	1526	6	1	4753	4331	8563	2117	774784	6	5
Male	Control	TRUE	A	6	1	0	0	9	6	735	916	-532	1714	[712,902,751,930]	269.3	0.9336	0.5331	1098	8	1	5591	4932	13070	2318	514414	8	6
Male	Control	TRUE	A	6	1	0	0	9	7	78	921	-920	1711	[67,910,89,934]	156.8	0.9743	0.8245	1644	9	1	5635	5301	10790	2225	552183	9	7
Male	Control	TRUE	A	6	1	0	0	10	1	743	339	-1171	2054	[735,329,750,359]	132.2	0.8492	0.4591	2197	4	1	5648	4999	11662	3084	547900	4	1
Male	Control	TRUE	A	6	1	0	0	10	2	947	429	-1047	2003	[937,419,967,440]	188.8	0.9709	0.6377	2769	5	1	8639	9055	15080	3048	1252600	5	2
Male	Control	TRUE	A	6	1	0	0	10	3	1061	885	-982	1732	[1050,872,1073,900]	166.3	0.9441	0.6237	1262	6	1	2939	2961	5299	1192	476106	6	3
Male	Control	TRUE	A	6	1	0	0	10	4	405	999	-1371	1665	[396,990,415,1009]	108.3	1	0.8289	1883	7	1	4580	4637	7299	2464	421325	7	4
Male	Control	TRUE	A	6	1	0	0	10	5	303	1009	-1434	1657	[273,990,323,1035]	338.9	0.7584	0.3048	1430	8	1	5676	5941	10021	2066	1078530	8	5
Male	Control	TRUE	A	6	1	0	0	11	1	431	171	-2002	2155	[421,161,441,186]	142.7	0.9709	0.7115	2308	3	1	7795	7063	13524	3297	678178	3	1
Male	Control	TRUE	A	6	1	0	0	11	2	563	677	-1924	1854	[550,666,574,693]	200.7	0.9208	0.6723	1803	5	1	7691	7849	12674	2753	807521	5	2
Male	Control	TRUE	A	6	1	0	0	11	3	149	773	-2168	1799	[139,763,162,783]	133.6	1.005	0.7573	2178	6	1	4618	4608	8772	1887	701963	6	3
Male	Control	TRUE	A	6	1	0	0	12	1	441	24	-1995	1597	[429,14,455,35]	161.7	0.9437	0.6875	2948	2	1	8545	8046	17610	3609	1119390	1	1
Male	Control	TRUE	A	6	1	0	0	12	2	725	298	-1828	1433	[712,286,738,315]	224	0.9686	0.8132	970.6	4	1	3413	3097	6773	1892	334471	3	2
Male	Control	TRUE	A	6	1	0	0	12	3	1003	609	-1665	1250	[984,598,1014,622]	195.8	0.977	0.6444	1040	6	1	3372	3133	6955	1423	411403	5	3
Male	Control	TRUE	A	6	1	0	0	12	4	575	995	-1916	1021	[563,983,587,1007]	151.5	0.9713	0.8269	3166	7	1	6658	6312	13337	3422	1051900	6	4
Male	Control	TRUE	A	6	1	0	0	12	5	522	1045	-1947	992	[510,1032,533,1057]	152.9	0.9279	0.7308	2790	8	1	5929	5920	10523	2466	1043570	7	5
Male	Control	TRUE	A	6	1	0	0	13	1	900	455	-1080	1341	[884,445,910,467]	176.1	0.9463	0.7234	2357	2	1	7711	7877	13900	2928	1002459	2	1
Male	Control	TRUE	A	6	1	0	0	14	1	123	450	-894	1345	[107,441,133,459]	133.6	0.9502	0.5988	2025	2	1	5639	5679	11453	2302	631619	1	1
Male	Control	TRUE	A	6	1	0	0	14	2	422	610	-715	1249	[409,598,435,623]	185.6	0.9763	0.8224	1851	3	1	5604	5429	10616	2189	756491	2	2
Male	Control	TRUE	A	6	1	0	0	15	1	357	107	-108	1547	[346,94,369,124]	208.1	0.9545	0.7148	1993	3	1	7188	7455	11999	2660	941597	2	1
Male	Control	TRUE	A	6	1	0	0	15	2	645	979	62	1031	[636,967,654,989]	117.4	0.9867	0.7351	2329	5	1	6630	5734	14647	3012	576844	4	2
Male	Control	TRUE	A	6	1	0	0	15	3	135	982	-239	1029	[122,972,147,993]	148.4	0.9111	0.6461	1973	6	1	6830	6112	14592	2733	662555	5	3
Male	Control	TRUE	A	6	1	0	0	16	1	107	323	389	1416	[98,315,116,348]	183.5	0.8726	0.4749	2006	2	1	7242	7344	13076	2747	869001	2	1
Male	Control	TRUE	A	6	1	0	0	16	2	541	473	647	1331	[528,461,555,486]	177.5	0.966	0.7027	939.6	4	1	2097	2110	3699	891	385914	4	2
Male	Control	TRUE	A	6	1	0	0	17	1	244	73	1116	1566	[227,51,261,100]	367	0.8679	0.4213	1361	1	1	7108	7091	12427	2814	966690	1	1
Male	Control	TRUE	A	6	1	0	0	17	2	393	205	1205	1490	[381,192,405,219]	179.7	0.9575	0.7279	2124	2	1	8716	8665	15267	3911	801869	2	2
Male	Control	TRUE	A	6	1	0	0	17	3	295	506	1147	1312	[283,493,308,518]	184.9	0.9741	0.8143	3962	3	1	11371	11675	20708	3968	1819340	3	3
Male	Control	TRUE	A	6	1	0	0	17	4	92	937	1026	1056	[79,925,105,949]	185.3	0.9907	0.816	1600	8	1	5626	5722	8894	2486	630132	8	4
Male	Control	TRUE	A	6	1	0	0	18	1	314	233	1804	1472	[296,222,334,247]	239.8	0.8939	0.5468	1611	2	1	5153	5410	9167	1874	896674	1	1
Male	Control	TRUE	A	6	1	0	0	18	2	354	605	1827	1252	[343,596,364,616]	125.9	0.9697	0.7894	3341	4	1	5902	5912	11144	2106	1085930	3	2
Male	Control	TRUE	A	6	1	0	0	18	3	952	725	2181	1185	[937,700,963,738]	210.6	0.8162	0.3538	1292	6	1	4598	4538	8533	1767	574758	5	3
Male	Control	TRUE	A	6	1	0	0	18	4	825	836	2109	1116	[810,827,845,845]	162.1	0.7972	0.4029	1200	8	1	4222	4475	7255	1799	371499	7	4
Male	Control	TRUE	A	6	1	0	0	18	5	199	927	1736	1061	[188,916,211,943]	183.2	0.984	0.8093	1029	9	1	2918	2619	6266	1370	388136	8	5
Male	Control	TRUE	A	6	1	0	0	19	1	557	67	2592	925	[540,57,567,79]	158.9	0.9495	0.6595	3004	1	1	8785	8477	15522	3509	1159580	1	1
Male	Control	TRUE	A	6	1	0	0	19	2	380	99	2489	906	[369,88,392,113]	181.4	0.9631	0.7801	4656	2	1	13796	13694	24873	5169	2041780	2	2
Male	Control	TRUE	A	6	1	0	0	19	3	871	117	2780	896	[861,105,881,130]	151.5	0.9227	0.6979	1629	3	1	5337	4828	10179	2474	475001	3	3
Male	Control	TRUE	A	6	1	0	0	19	4	1058	237	2891	825	[1048,227,1068,249]	135.4	0.9755	0.764	1671	4	1	4677	4493	8253	2443	477067	4	4
Male	Control	TRUE	A	6	1	0	0	19	5	771	514	2721	660	[757,500,786,531]	260.9	0.9766	0.8404	2236	6	1	6378	6383	12215	2701	1301160	6	5
Male	Control	TRUE	A	6	1	0	0	19	6	334	729	2461	533	[324,720,343,740]	110	0.9487	0.751	3173	8	1	5947	5855	10782	2621	844411	8	7
Male	Control	TRUE	A	6	1	0	0	19	7	243	777	2408	505	[231,769,255,785]	112.2	0.9406	0.6157	1559	9	1	4269	4170	7457	2042	367156	9	8
Male	Control	TRUE	A	6	1	0	0	19	8	712	977	2686	386	[702,967,724,989]	142.7	0.9709	0.7311	2419	10	1	7290	7339	14188	2718	838298	10	9
Male	Control	TRUE	A	6	1	0	0	19	9	951	1021	2827	360	[940,1010,963,1032]	150.1	0.9659	0.7425	2452	11	1	6230	6185	11797	2247	897167	11	10
Male	Control	TRUE	A	6	1	0	0	20	1	318	103	1806	901	[310,94,327,125]	156.8	0.9113	0.4975	1268	2	1	3156	3095	5438	1451	407081	2	1
Male	Control	TRUE	A	6	1	0	0	20	2	741	297	2057	788	[730,283,751,315]	188.1	0.9396	0.594	2079	4	1	8694	8424	16963	3320	869427	4	2
Male	Control	TRUE	A	6	1	0	0	20	3	861	330	2129	769	[851,320,872,342]	133.9	1.007	0.7797	2267	6	1	5973	5814	12214	2952	639106	6	3
Male	Control	TRUE	A	6	1	0	0	20	4	493	665	1911	571	[478,652,512,678]	262.3	0.967	0.708	1571	8	1	5510	4897	12517	3232	738357	8	4
Male	Control	TRUE	A	6	1	0	0	22	1	539	143	647	881	[530,134,554,153]	131.1	0.9571	0.7349	1488	1	1	4427	3507	11808	2198	385111	1	1
Male	Control	TRUE	A	6	1	0	0	22	2	549	423	651	714	[537,412,560,436]	154	1.016	0.8262	2084	3	1	5111	4536	13503	1934	751338	3	2
Male	Control	TRUE	A	6	1	0	0	22	3	836	799	821	491	[823,788,847,812]	169.1	1.002	0.8404	1245	5	1	3199	2965	6223	1488	422273	5	3
Male	Control	TRUE	A	6	1	0	0	22	4	899	917	859	421	[889,907,909,931]	145.9	0.9837	0.8035	2095	6	1	6401	6457	11233	2566	704065	6	4
Male	Control	TRUE	A	6	1	0	0	23	1	516	45	-12	936	[506,37,529,64]	143.4	0.8634	0.4994	3614	2	1	9289	9528	16832	3937	1235390	1	1
Male	Control	TRUE	A	6	1	0	0	23	2	716	961	105	395	[704,952,729,972]	148.7	0.9439	0.6555	1764	5	1	5434	5384	10179	2128	608625	4	2
Male	Control	TRUE	A	6	1	0	0	23	3	976	205	258	844	[961,192,989,220]	214.1	1.03	0.758	1549	6	1	7103	6680	15228	2791	710329	5	3
Male	Control	TRUE	A	6	1	0	0	24	1	16	156	-957	873	[4,147,26,166]	125.9	0.9697	0.7343	1848	1	1	4160	4253	7078	1680	540841	1	1
Male	Control	TRUE	A	6	1	0	0	24	2	815	210	-482	841	[803,198,829,224]	188.1	0.9839	0.8404	2003	2	1	8836	8614	16677	3994	821780	2	2
Male	Control	TRUE	A	6	1	0	0	24	3	502	714	-667	542	[492,704,515,726]	142.7	1.007	0.7954	1983	3	1	5877	5425	11102	2741	564175	3	3
Male	Control	TRUE	A	6	1	0	0	25	1	696	77	-1199	920	[684,64,709,89]	175.1	0.9894	0.8062	2761	2	1	9241	8947	16781	3544	1136680	2	1
Male	Control	TRUE	A	6	1	0	0	25	2	388	774	-1377	507	[377,763,415,784]	215.9	0.8615	0.4609	2185	5	1	8598	8955	16088	3574	1066140	5	2
Male	Control	TRUE	A	6	1	0	0	26	1	146	375	-2171	741	[134,363,159,394]	234.1	0.967	0.7164	2322	1	1	8657	9058	14388	3242	1229292	1	1
Male	Control	TRUE	A	6	1	0	0	27	1	124	366	-2828	748	[114,356,140,378]	163.8	0.9357	0.6811	2395	1	1	6329	6479	10664	3233	917694	1	1
Male	Control	TRUE	A	6	1	0	0	28	1	829	23	-2411	306	[816,12,842,34]	158.9	1.017	0.7593	1651	1	1	4218	3960	8347	1647	624228	1	1
Male	Control	TRUE	A	6	1	0	0	28	2	971	68	-2327	279	[959,56,984,80]	183.5	0.9697	0.8398	900.9	2	1	1998	1951	3394	962	331678	2	2
Male	Control	TRUE	A	6	1	0	0	28	3	841	183	-2401	211	[826,173,870,194]	244	0.8184	0.4288	1910	3	1	5914	5841	11636	2220	1076260	3	3
Male	Control	TRUE	A	6	1	0	0	28	4	839	439	-2405	60	[828,425,850,451]	162.8	0.9795	0.7107	2533	5	1	8347	8903	13976	2906	993350	5	4
Male	Control	TRUE	A	6	1	0	0	29	1	481	485	-1972	31	[473,477,489,497]	103	0.9704	0.7822	2424	2	1	5206	4929	9181	2250	562289	2	1
Male	Control	TRUE	A	6	1	0	0	29	2	639	686	-1878	-87	[630,677,651,696]	123.8	0.9787	0.8182	3355	3	1	8194	8990	13258	2710	1056960	3	2
Male	Control	TRUE	A	6	1	0	0	29	3	562	944	-1924	-240	[549,933,578,958]	188.4	0.955	0.6383	1657	5	1	6335	6294	13197	2529	696811	5	3
Male	Control	TRUE	A	6	1	0	0	31	1	759	257	-516	167	[748,245,771,268]	154.7	0.9665	0.7543	1743	2	1	5016	4710	9018	2688	541716	2	1
Male	Control	TRUE	A	6	1	0	0	31	2	537	490	-647	29	[525,477,551,505]	200.7	0.9621	0.6325	1172	4	1	4186	3593	9698	2303	372577	3	2
Male	Control	TRUE	A	6	1	0	0	31	3	432	555	-707	-9	[422,545,450,565]	180	0.9438	0.6964	1921	7	1	6299	6344	11324	2422	774791	6	3
Male	Control	TRUE	A	6	1	0	0	31	4	299	609	-788	-42	[286,596,313,625]	229.2	0.9819	0.8115	1954	8	1	8394	7654	16206	3261	965316	7	4
Male	Control	TRUE	A	6	1	0	0	31	5	833	980	-472	-261	[824,970,843,990]	109.3	0.9646	0.7845	3043	9	1	6918	7176	12604	2581	823235	8	5
Male	Control	TRUE	A	6	1	0	0	31	6	698	994	-552	-269	[685,983,709,1004]	143.8	0.9579	0.6266	1966	10	1	3921	3656	7662	1874	658667	9	6
Male	Control	TRUE	A	6	1	0	0	31	7	135	950	-885	-244	[123,938,148,965]	191.3	0.949	0.7113	1892	11	1	7386	7293	13521	3025	738623	10	7
Male	Control	TRUE	A	6	1	0	0	31	8	179	955	-860	-247	[164,939,195,971]	272.5	1.015	0.8092	1411	12	1	5991	5505	10189	2816	772843	11	8
Male	Control	TRUE	A	6	1	0	0	32	1	557	416	657	73	[544,404,571,428]	176.1	1.009	0.7726	2338	1	1	8012	7930	15680	3190	969439	1	1
Male	Control	TRUE	A	6	1	0	0	32	2	884	703	850	-97	[872,692,896,715]	145.2	0.9809	0.6662	1957	2	1	5799	5579	9951	2224	655261	2	2
Male	Control	TRUE	A	6	1	0	0	33	1	836	107	1467	257	[813,89,857,117]	208.5	0.6769	0.3291	1941	1	1	6496	6054	10783	2802	928889	1	1
Male	Control	TRUE	A	6	1	0	0	33	2	1045	628	1591	-53	[1033,618,1055,641]	147.7	0.9399	0.7376	2657	3	1	8529	8975	14996	3136	938227	2	2
Male	Control	TRUE	A	6	1	0	0	33	3	538	745	1292	-122	[527,735,552,756]	152.9	0.9939	0.7141	3090	4	1	9326	9526	19860	3288	1147130	3	3
Male	Control	TRUE	A	6	1	0	0	34	1	666	302	2012	140	[649,292,680,313]	174	0.9395	0.5701	2228	2	1	7772	7307	14617	3707	769401	2	1
Male	Control	TRUE	A	6	1	0	0	34	2	214	576	1744	-22	[202,564,226,589]	168.8	1.001	0.8285	2476	5	1	6696	6812	12831	2415	997752	5	2
Male	Control	TRUE	A	6	1	0	0	34	3	327	771	1811	-139	[313,759,339,788]	209.9	0.9733	0.8045	1477	6	1	5094	4390	12989	2329	575625	6	3
Male	Control	TRUE	A	6	1	0	0	34	4	54	1014	1648	-282	[33,1001,67,1033]	255.6	0.8832	0.5747	1553	7	1	7050	6761	15434	3028	860072	7	4
Male	Control	TRUE	A	6	1	0	0	35	1	804	128	2740	242	[793,113,816,151]	221.5	0.8524	0.4777	1195	2	1	4243	3730	8713	2029	462506	2	1
Male	Control	TRUE	A	6	1	0	0	35	2	43	201	2290	201	[32,191,58,211]	155	0.9678	0.7478	2372	4	1	7203	6582	15689	3356	749078	4	2
Male	Control	TRUE	A	6	1	0	0	35	3	551	205	2591	197	[539,193,564,222]	188.4	0.985	0.5947	1946	5	1	7604	7784	12607	2916	806011	5	3
Male	Control	TRUE	A	6	1	0	0	35	4	231	327	2401	126	[220,316,246,338]	178.2	0.9682	0.8088	2920	6	1	8636	8049	16917	3879	1209080	6	4
Male	Control	TRUE	A	6	1	0	0	35	5	1046	400	2883	82	[1033,388,1059,414]	199.3	0.9873	0.8053	1749	7	1	6633	6265	13621	2978	703098	7	5
Male	Control	TRUE	A	6	1	0	0	35	6	294	1005	2438	-276	[285,995,304,1016]	108.3	1	0.6986	1424	8	1	2935	2747	6322	1188	366816	8	6
Male	Control	TRUE	A	6	1	0	0	36	1	154	593	2355	-677	[140,579,169,607]	247.5	0.999	0.9101	1605	2	1	6528	6403	12622	2217	848577	2	1
Male	Control	TRUE	A	6	1	0	0	36	2	212	688	2390	-735	[202,678,224,702]	153.3	0.945	0.6667	3827	3	1	14539	14983	24138	5546	1264850	3	2
Male	Control	TRUE	A	6	1	0	0	38	1	488	771	1261	-783	[476,759,501,783]	175.4	1.024	0.8159	2063	4	1	5635	5415	9912	3171	715636	4	2
Male	Control	TRUE	A	6	1	0	0	39	1	82	1042	375	-947	[71,1032,92,1061]	186.7	0.9497	0.676	2099	3	1	6712	6299	14869	2552	892630	3	1
Male	Control	TRUE	A	6	1	0	0	39	2	879	1059	848	-954	[869,1050,891,1068]	111.8	0.9983	0.7574	2431	4	1	6742	7173	10355	2905	627032	4	2
Male	Control	TRUE	A	6	1	0	0	40	1	471	764	-40	-779	[458,752,484,778]	179.7	0.9885	0.753	2323	2	1	9772	9252	18258	3645	938101	2	1
Male	Control	TRUE	A	6	1	0	0	40	2	868	782	195	-792	[857,769,881,801]	189.5	0.9297	0.6497	2375	3	1	6383	6138	10353	4155	874440	3	2
Male	Control	TRUE	A	6	1	0	0	41	1	1015	55	-363	-358	[1005,45,1029,66]	161.4	0.9124	0.7523	1795	1	1	4702	4657	7930	2248	663019	1	1
Male	Control	TRUE	A	6	1	0	0	41	2	763	588	-513	-675	[750,575,778,602]	225	0.9993	0.8786	2175	4	1	7184	7011	13468	3119	1099150	4	2
Male	Control	TRUE	A	6	1	0	0	42	1	745	694	-1169	-738	[735,684,758,706]	149.1	0.9292	0.6945	1853	4	1	4646	4735	8738	1523	599355	4	1
Male	Control	TRUE	A	6	1	0	0	44	1	478	645	-2620	-709	[466,633,491,657]	183.2	0.9686	0.8633	2600	4	1	9062	8747	18086	4266	1096479	3	1
Male	Control	TRUE	A	6	1	0	0	45	1	806	16	-1777	-984	[795,4,824,35]	221.5	0.8984	0.4998	1670	1	1	5276	5501	10070	1819	886425	1	1
Male	Control	TRUE	A	6	1	0	0	45	2	852	945	-1752	-1532	[840,929,864,959]	212	0.8993	0.6667	1545	5	1	6724	6540	15691	2697	679095	5	2
Male	Control	TRUE	A	6	1	0	0	46	1	696	760	-1199	-1422	[684,747,709,772]	165.9	0.8989	0.7047	2208	7	1	5777	5338	10207	2747	831952	6	1
Male	Control	TRUE	A	6	1	0	0	46	2	904	920	-1075	-1517	[891,904,920,933]	219	0.956	0.747	1133	8	1	4612	4482	8606	1792	511887	7	2
Male	Control	TRUE	A	6	1	0	0	47	1	157	168	-872	-1073	[146,156,168,186]	195.5	0.9613	0.6901	1894	3	1	8255	8063	14581	2821	850272	2	1
Male	Control	TRUE	A	6	1	0	0	47	2	521	792	-657	-1440	[510,775,532,805]	170.9	0.9595	0.6634	2751	4	1	9154	8703	15698	3819	1116830	3	2
Male	Control	TRUE	A	6	1	0	0	48	1	806	256	157	-1125	[791,244,818,274]	199	0.943	0.5391	1410	2	1	4724	4616	9627	2316	562172	1	1
Male	Control	TRUE	A	6	1	0	0	48	2	422	517	-69	-1278	[410,505,436,530]	191.3	0.9784	0.799	2197	4	1	7236	6903	14800	2774	955189	3	2
Male	Control	TRUE	A	6	1	0	0	49	1	502	118	624	-1042	[492,109,512,127]	104.4	0.9578	0.7586	3612	1	1	8915	8399	17099	3618	909330	1	1
Male	Control	TRUE	A	6	1	0	0	49	2	460	533	599	-1287	[443,516,477,547]	214.8	0.8941	0.4086	1206	3	1	4830	4676	9361	2124	497538	3	2
Male	Control	TRUE	A	6	1	0	0	49	3	417	594	574	-1325	[407,584,428,606]	135.4	0.9577	0.8576	3414	4	1	7536	7466	12537	2990	1122790	4	3
Male	Control	TRUE	A	6	1	0	0	49	4	628	857	698	-1481	[607,842,647,881]	319.9	0.851	0.3985	1298	5	1	5609	4932	14661	2152	863790	5	4
Male	Control	TRUE	A	6	1	0	0	50	1	375	407	1195	-1214	[367,399,389,418]	112.5	0.8397	0.6812	3339	3	1	7426	7085	15229	4391	876251	3	1
Male	Control	TRUE	A	6	1	0	0	50	2	738	612	1410	-1334	[727,601,751,623]	152.9	1.012	0.8337	2597	5	1	6543	6399	14031	2466	955303	5	2
Male	Control	TRUE	A	6	1	0	0	50	3	842	715	1473	-1396	[832,705,856,726]	141.3	1.02	0.7878	1988	6	1	5300	5092	9479	2124	635970	6	3
Male	Control	TRUE	A	6	1	0	0	50	4	371	720	1191	-1400	[360,709,382,736]	175.4	0.9746	0.7645	2647	7	1	8601	9007	14599	3155	1066460	7	4
Male	Control	TRUE	A	6	1	0	0	50	5	800	844	1446	-1473	[789,834,810,859]	156.1	0.9717	0.7442	1999	8	1	5579	5679	10703	2108	730848	8	5
Male	Control	TRUE	A	6	1	0	0	50	6	346	1006	1177	-1569	[335,995,360,1019]	183.2	0.939	0.7126	1765	10	1	5399	4859	10268	2173	712652	10	6
Male	Control	TRUE	A	6	1	0	0	51	1	441	819	1879	-1458	[428,807,455,835]	206	1.007	0.7428	2024	2	1	8039	7461	18346	3135	908401	2	1
Male	Control	TRUE	A	6	1	0	0	51	2	1030	1001	2229	-1567	[1018,987,1042,1023]	227.1	0.9631	0.617	1405	3	1	5232	5615	9229	1981	701124	3	2
Male	Control	TRUE	A	6	1	0	0	52	1	845	672	2118	-2016	[830,663,859,684]	142.7	0.89	0.5684	1138	3	1	4730	4365	10624	2318	586569	3	1
Male	Control	TRUE	A	6	1	0	0	52	2	825	680	2107	-2021	[814,670,838,691]	120.2	0.8913	0.6486	1068	4	1	4730	4365	10624	2318	586569	4	2
Male	Control	TRUE	A	6	1	0	0	53	1	352	52	1180	-1649	[342,42,362,64]	119.2	0.9758	0.6297	1480	1	1	3460	3235	7279	1489	387485	1	1
Male	Control	TRUE	A	6	1	0	0	53	2	797	848	1444	-2121	[787,838,806,861]	129	0.9135	0.6461	2873	4	1	8893	8354	17966	3788	818116	4	2
Male	Control	TRUE	A	6	1	0	0	54	1	298	376	503	-1841	[287,365,310,389]	162.8	1.013	0.8049	2221	2	1	7967	7538	14257	3357	796736	2	1
Male	Control	TRUE	A	6	1	0	0	54	2	679	741	729	-2058	[669,731,691,754]	141.7	0.9843	0.8414	1586	4	1	4355	4055	9289	2246	439826	4	2
Male	Control	TRUE	A	6	1	0	0	54	3	179	758	431	-2067	[164,745,192,772]	216.9	0.9924	0.8521	1574	5	1	5411	4990	11339	3072	643871	5	3
Male	Control	TRUE	A	6	1	0	0	55	1	943	221	240	-1749	[928,210,962,233]	224.7	0.9183	0.5843	2534	1	1	9804	10366	16147	3482	1313800	1	1
Male	Control	TRUE	A	6	1	0	0	55	2	610	403	42	-1857	[600,393,621,414]	132.5	1	0.8603	3243	2	1	7203	7189	11630	2867	849926	2	2
Male	Control	TRUE	A	6	1	0	0	55	3	290	456	-148	-1888	[279,446,300,467]	140.3	0.9608	0.8016	2177	3	1	5566	6031	11254	2081	717955	3	3
Male	Control	TRUE	A	6	1	0	0	55	4	743	509	121	-1920	[733,498,753,520]	120.6	1.003	0.7735	1836	4	1	4260	3912	9426	1959	481364	4	4
Male	Control	TRUE	A	6	1	0	0	55	5	121	1064	-248	-2249	[110,1053,133,1077]	163.8	1	0.8551	1863	9	1	5352	5399	9485	2015	711829	8	5
Male	Control	TRUE	A	6	1	0	0	56	1	300	980	-787	-2199	[291,971,312,990]	117.1	0.9654	0.7916	2486	6	1	5227	5241	9160	2369	695176	6	1
Male	Control	TRUE	A	6	1	0	0	57	1	200	163	-1493	-1715	[188,151,212,176]	185.6	0.9465	0.7801	1117	3	1	3240	2906	7056	1662	356423	2	1
Male	Control	TRUE	A	6	1	0	0	57	2	626	370	-1240	-1837	[613,353,639,384]	214.8	0.9319	0.701	1741	5	1	5226	4729	11462	2679	726368	4	2
Male	Control	TRUE	A	6	1	0	0	57	3	1054	937	-986	-2174	[1042,926,1069,950]	180.4	0.9907	0.6968	3402	8	1	8597	8522	15815	3370	1513110	7	3
Male	Control	TRUE	A	6	1	0	0	58	1	1025	545	-1650	-1942	[1015,535,1035,558]	142	0.9857	0.7975	1369	1	1	3463	3415	5883	1405	432820	1	1
Male	Control	TRUE	A	6	1	0	0	58	2	160	920	-2161	-2163	[151,911,173,930]	133.9	0.9517	0.7674	1741	3	1	4167	4188	7565	1630	541661	3	2
Male	Control	TRUE	A	6	1	0	0	59	1	36	311	-944	-2448	[26,302,46,322]	112.5	1.002	0.685	2236	3	1	4843	4807	8364	2002	585980	3	1
Male	Control	TRUE	A	6	1	0	0	59	2	533	661	-649	-2656	[522,650,545,674]	157.5	0.9289	0.7122	2924	5	1	9393	9696	16971	4380	1080140	5	2
Male	Control	TRUE	A	6	1	0	0	59	3	714	718	-543	-2689	[702,707,722,728]	125.9	0.8998	0.5974	2399	6	1	7924	8348	12408	2875	713128	6	3
Male	Control	TRUE	A	6	1	0	0	60	1	817	64	165	-2302	[806,53,829,78]	161	1.007	0.7884	2352	1	1	7793	7449	13500	3076	865077	1	1
Male	Control	TRUE	A	6	1	0	0	60	2	841	131	180	-2340	[829,113,854,143]	190.6	0.9328	0.6202	1421	2	1	4908	4739	8439	2428	564452	2	2
Male	Control	TRUE	A	6	1	0	0	60	3	768	388	134	-2495	[744,372,785,408]	327	0.9198	0.527	1277	4	1	5412	5780	8271	1932	893039	4	3
Male	Control	TRUE	A	6	1	0	0	60	4	624	416	50	-2511	[614,405,635,432]	165.6	0.8977	0.691	1290	5	1	3509	3133	7378	1740	410538	5	4
Male	Control	TRUE	A	6	1	0	0	60	5	468	598	-42	-2618	[456,585,484,611]	206	0.9769	0.7446	1930	6	1	7286	7069	14474	3353	677626	6	5
Male	Control	TRUE	A	6	1	0	0	61	1	51	620	356	-2632	[41,611,60,630]	102.3	1.009	0.7761	2909	5	1	4881	4944	8345	2192	697979	5	1
Male	Control	TRUE	A	6	1	0	0	61	2	452	618	594	-2629	[438,595,469,633]	289	0.895	0.6548	1378	8	1	2994	3135	5701	1046	978927	8	2
Male	Obese	TRUE	A	7	1	0	0	1	1	611	883	43	-203	[601,863,620,901]	210.6	0.8601	0.4658	1906	1	1	5473	4888	10772	2796	755338	1	1
Male	Obese	TRUE	A	7	1	0	0	1	2	427	999	-67	-272	[414,989,439,1009]	153.3	0.945	0.7032	2504	2	1	5468	5395	10049	1985	956916	2	2
Male	Obese	TRUE	A	7	1	0	0	2	1	29	44	-947	2876	[16,31,47,59]	250.7	0.9929	0.7573	2108	2	1	4161	4092	7394	1967	1152630	2	1
Male	Obese	TRUE	A	7	1	0	0	2	2	478	165	-684	2802	[465,154,488,187]	211.6	0.8984	0.5455	4211	3	1	11048	11394	17238	4337	2110150	3	2
Male	Obese	TRUE	A	7	1	0	0	2	3	753	458	-519	2631	[743,448,762,470]	125.9	0.9337	0.7402	2795	5	1	6341	6089	11559	2822	805352	5	3
Male	Obese	TRUE	A	7	1	0	0	2	4	75	614	-920	2538	[65,601,93,626]	181.4	0.8793	0.5732	2348	6	1	7179	6436	13432	4408	696367	6	4
Male	Obese	TRUE	A	7	1	0	0	2	5	888	968	-440	2328	[877,958,900,982]	138.5	0.8313	0.6389	1199	9	1	3231	3054	5577	1548	562190	9	5
Male	Obese	TRUE	A	7	1	0	0	3	1	1038	342	297	2700	[1020,330,1059,355]	279.9	0.9318	0.6157	1318	3	1	2193	2192	3904	1239	807046	3	1
Male	Obese	TRUE	A	7	1	0	0	3	2	416	484	-72	2615	[400,471,433,503]	240.5	0.8954	0.495	2157	5	1	6403	7174	9892	2269	1190880	5	2
Male	Obese	TRUE	A	7	1	0	0	3	3	90	486	-267	2615	[76,475,101,499]	158.9	0.9992	0.7701	3711	6	1	6871	6871	11216	2930	1422340	6	3
Male	Obese	TRUE	A	7	1	0	0	3	4	303	835	-141	2407	[287,815,316,853]	275.3	0.8902	0.6255	1171	8	1	3801	3596	7929	1656	634714	7	4
Male	Obese	TRUE	A	7	1	0	0	3	5	725	982	111	2320	[714,968,742,1000]	217.6	0.7918	0.6254	1188	9	1	2039	1982	3074	1205	552689	8	5
Male	Obese	TRUE	A	7	1	0	0	3	6	570	267	18	2745	[556,253,586,281]	253.1	0.9852	0.8207	2747	11	1	9634	9945	15299	3907	1416230	10	7
Male	Obese	TRUE	A	7	1	0	0	4	1	431	39	581	2877	[421,30,440,57]	160.3	0.9388	0.6726	2085	1	1	4540	4615	7733	1890	771786	1	1
Male	Obese	TRUE	A	7	1	0	0	4	2	977	222	905	2771	[968,213,986,234]	119.9	0.9602	0.801	2554	2	1	5142	4802	9285	2732	617054	2	2
Male	Obese	TRUE	A	7	1	0	0	4	3	766	323	780	2710	[754,312,778,339]	188.8	0.9139	0.6871	3868	4	1	7176	7117	11994	3619	1076370	4	3
Male	Obese	TRUE	A	7	1	0	0	4	4	485	483	615	2617	[474,472,500,495]	163.5	1.016	0.7642	2540	5	1	5634	5402	9861	2381	980266	5	4
Male	Obese	TRUE	A	7	1	0	0	4	5	191	556	437	2573	[173,548,200,566]	135.4	0.8917	0.5785	1751	7	1	3985	3769	7992	1527	533958	7	5
Male	Obese	TRUE	A	7	1	0	0	4	6	1000	983	918	2319	[979,966,1016,1003]	351.2	0.9807	0.65	1619	8	1	3475	3466	5805	1632	962607	8	6
Male	Obese	TRUE	A	7	1	0	0	6	1	919	501	1517	1960	[910,492,928,511]	107.2	0.9943	0.7644	2789	1	1	4617	4474	9274	2288	729507	1	1
Male	Obese	TRUE	A	7	1	0	0	6	2	1040	628	1588	1885	[1031,619,1050,639]	105.1	1.004	0.8145	1864	2	1	3549	3233	6157	1644	454260	2	2
Male	Obese	TRUE	A	7	1	0	0	7	1	554	145	654	2171	[544,135,564,156]	125.5	0.987	0.8338	3171	1	1	5537	5477	9358	2490	930175	1	1
Male	Obese	TRUE	A	7	1	0	0	7	2	967	271	900	2093	[957,257,978,297]	244	0.8806	0.4969	1886	2	1	6663	6883	11847	2655	946162	2	2
Male	Obese	TRUE	A	7	1	0	0	7	3	828	478	817	1974	[816,468,840,488]	141.3	0.9828	0.7194	2966	3	1	7395	7364	13078	2920	946552	3	3
Male	Obese	TRUE	A	7	1	0	0	7	4	205	684	447	1852	[188,675,217,693]	156.5	0.9101	0.5846	1804	6	1	5200	4330	10744	2556	530416	6	4
Male	Obese	TRUE	A	7	1	0	0	7	5	44	818	352	1772	[33,807,59,830]	130.4	0.9365	0.5677	973.6	8	1	2788	2697	5519	1269	596734	8	5
Male	Obese	TRUE	A	7	1	0	0	7	6	1005	879	922	1735	[992,866,1019,896]	229.2	0.9959	0.8031	1702	10	1	4422	4589	6987	1797	835747	10	6
Male	Obese	TRUE	A	7	1	0	0	8	1	929	266	232	2099	[919,256,941,280]	152.6	0.9925	0.8199	3065	2	1	6095	6242	9712	2231	1158100	2	1
Male	Obese	TRUE	A	7	1	0	0	8	2	724	673	110	1857	[714,660,734,692]	186	0.9193	0.6044	1758	4	1	5164	5057	9248	2126	712600	4	2
Male	Obese	TRUE	A	7	1	0	0	8	3	798	872	154	1738	[787,858,811,892]	218	0.927	0.5727	1341	6	1	3687	3587	6198	1551	634097	6	3
Male	Obese	TRUE	A	7	1	0	0	9	1	61	431	-930	2001	[47,419,74,448]	210.9	0.9621	0.6325	2544	1	1	6610	6790	11060	2544	1262480	1	1
Male	Obese	TRUE	A	7	1	0	0	9	2	1021	665	-359	1862	[1010,654,1035,678]	173	0.9986	0.81	1918	2	1	4195	4091	7030	1808	759308	2	2
Male	Obese	TRUE	A	7	1	0	0	9	3	232	726	-827	1827	[221,715,246,737]	163.5	0.9988	0.8332	2471	3	1	6296	5717	13104	2907	906601	3	3
Male	Obese	TRUE	A	7	1	0	0	9	4	709	928	-546	1705	[698,918,719,943]	152.9	0.9766	0.8179	2260	4	1	5203	4900	9322	3042	666031	4	4
Male	Obese	TRUE	A	7	1	0	0	10	1	721	734	-1184	1822	[711,725,731,747]	123.8	0.9417	0.7428	3037	2	1	4713	4407	7828	3434	711706	2	2
Male	Obese	TRUE	A	7	1	0	0	11	1	248	806	-2111	1778	[236,795,259,821]	176.5	0.9626	0.751	2040	3	1	6006	5225	13120	2873	750754	3	1
Male	Obese	TRUE	A	7	1	0	0	11	2	865	928	-1745	1706	[854,918,875,941]	140.6	0.998	0.7729	1713	4	1	2091	1995	3903	1226	596045	4	2
Male	Obese	TRUE	A	7	1	0	0	12	1	481	331	-1973	1415	[462,306,501,349]	367.4	0.8036	0.6091	1753	1	1	5540	6131	8321	2058	1418210	1	1
Male	Obese	TRUE	A	7	1	0	0	12	2	324	461	-2065	1339	[314,451,334,472]	122	0.9896	0.772	2913	3	1	5367	5371	8531	3003	681551	3	2
Male	Obese	TRUE	A	7	1	0	0	12	3	247	290	-2110	1439	[231,271,265,311]	372.3	0.9604	0.6925	1933	7	1	3506	3562	5961	1479	1759950	7	3
Male	Obese	TRUE	A	7	1	0	0	13	1	1034	680	-999	1208	[1017,663,1049,696]	283	0.9495	0.6536	2294	5	1	5253	5527	8013	2464	1518185	5	1
Male	Obese	TRUE	A	7	1	0	0	14	1	674	416	-565	1364	[660,393,693,440]	304.8	0.8095	0.4105	1879	3	1	5305	5447	8566	2938	1161880	3	2
Male	Obese	TRUE	A	7	1	0	0	14	2	618	454	-599	1342	[606,444,628,464]	139.6	0.9579	0.7553	2173	4	1	4436	4193	7113	3034	452483	4	3
Male	Obese	TRUE	A	7	1	0	0	14	3	681	496	-566	1322	[660,468,691,507]	221.8	0.8424	0.4054	1527	5	1	3393	3424	4282	2584	573421	5	4
Male	Obese	TRUE	A	7	1	0	0	14	4	828	541	-470	1293	[816,521,858,553]	244	0.8184	0.3627	1563	6	1	4215	4283	7064	1724	830450	6	5
Male	Obese	TRUE	A	7	1	0	0	14	5	1007	947	-369	1049	[996,934,1017,966]	186	0.9333	0.5821	1527	8	1	4835	4181	9000	2648	527063	8	6
Male	Obese	TRUE	A	7	1	0	0	14	6	516	1002	-659	1016	[504,987,530,1018]	218.7	0.9037	0.6486	1477	9	1	3212	2969	5121	1870	571723	9	7
Male	Obese	TRUE	A	7	1	0	0	14	7	986	1010	-381	1013	[975,998,999,1022]	153.3	1.013	0.8158	1119	10	1	2660	2451	4756	1282	316549	10	8
Male	Obese	TRUE	A	7	1	0	0	15	1	72	402	-277	1373	[62,391,84,412]	129.7	0.9875	0.7797	1425	2	1	4223	4036	7920	1844	375834	2	1
Male	Obese	TRUE	A	7	1	0	0	16	1	53	65	358	1573	[41,53,65,78]	176.5	0.9781	0.8171	1390	1	1	3678	3370	7760	1776	467160	1	1
Male	Obese	TRUE	A	7	1	0	0	16	2	92	243	382	1466	[82,235,104,258]	112.9	0.9256	0.5968	1895	4	1	2761	2604	4550	1581	615639	4	3
Male	Obese	TRUE	A	7	1	0	0	16	3	925	330	874	1413	[911,319,935,350]	190.2	0.918	0.5803	2091	5	1	5142	5171	7790	3412	663292	5	4
Male	Obese	TRUE	A	7	1	0	0	16	4	916	508	870	1309	[905,495,930,526]	214.5	0.8581	0.6738	2309	7	1	2966	3082	4162	1387	1278320	7	5
Male	Obese	TRUE	A	7	1	0	0	17	1	541	455	1293	1341	[533,446,554,465]	119.2	0.9383	0.6882	2464	1	1	3769	3548	6312	2048	452259	1	1
Male	Obese	TRUE	A	7	1	0	0	17	2	450	469	1239	1332	[439,453,462,485]	197.2	0.8856	0.594	2292	2	1	6788	6736	12691	2831	936715	2	2
Male	Obese	TRUE	A	7	1	0	0	17	3	970	711	1547	1190	[956,699,982,724]	163.8	0.9669	0.6975	1722	3	1	3686	3466	6462	1822	604526	3	3
Male	Obese	TRUE	A	7	1	0	0	17	4	317	726	1160	1181	[304,713,332,738]	190.6	1.007	0.7644	2309	4	1	4457	4228	7213	2533	958172	4	4
Male	Obese	TRUE	A	7	1	0	0	17	5	663	905	1365	1075	[650,892,675,917]	177.9	0.9827	0.8034	2259	5	1	7445	7321	14438	2878	900887	5	5
Male	Obese	TRUE	A	7	1	0	0	17	6	680	962	1375	1042	[666,939,693,980]	273.9	0.8771	0.4831	1482	6	1	5001	5130	7556	1974	845220	6	6
Male	Obese	TRUE	A	7	1	0	0	18	1	15	100	1626	1551	[5,90,24,113]	127.3	0.9578	0.7156	2375	1	1	4676	4261	7869	3103	598480	1	1
Male	Obese	TRUE	A	7	1	0	0	18	2	138	141	1697	1527	[118,128,150,156]	219	0.8925	0.5483	1897	2	1	5874	5936	9556	2456	904640	2	2
Male	Obese	TRUE	A	7	1	0	0	18	3	104	296	1681	1435	[95,283,121,310]	133.6	0.8265	0.3748	1672	4	1	3969	4163	6639	1604	964520	4	3
Male	Obese	TRUE	A	7	1	0	0	18	4	701	957	2034	1042	[680,943,721,982]	318.9	0.7449	0.4059	1285	7	1	5180	5362	8010	1882	849443	7	4
Male	Obese	TRUE	A	7	1	0	0	19	1	298	325	2440	772	[288,314,308,341]	160.3	0.9545	0.6212	2244	2	1	6710	6116	13271	2904	758281	2	1
Male	Obese	TRUE	A	7	1	0	0	19	2	672	612	2662	603	[661,601,683,624]	155.4	0.986	0.8914	2313	3	1	8014	7040	16024	3716	689161	3	2
Male	Obese	TRUE	A	7	1	0	0	21	1	86	598	1023	610	[73,586,98,614]	199.7	0.9884	0.793	1562	6	1	4107	4287	6563	1623	694007	6	1
Male	Obese	TRUE	A	7	1	0	0	21	2	537	656	1289	577	[522,639,550,670]	245	0.9667	0.7269	1324	7	1	3372	3277	6005	1740	559685	7	2
Male	Obese	TRUE	A	7	1	0	0	21	3	388	1039	1202	349	[377,1027,399,1055]	166.6	0.9768	0.7138	1096	8	1	2693	2511	5134	1255	379705	8	3
Male	Obese	TRUE	A	7	1	0	0	22	1	749	853	772	460	[733,838,767,868]	269.3	0.9336	0.7531	2550	4	1	4673	4699	8637	2368	1359930	4	1
Male	Obese	TRUE	A	7	1	0	0	22	2	148	289	416	794	[133,273,176,305]	289.3	0.8188	0.5249	1980	5	1	4273	4195	6552	2453	914376	5	2
Male	Obese	TRUE	A	7	1	0	0	23	1	873	512	198	662	[860,497,883,524]	158.2	0.9162	0.6508	2012	1	1	6385	6479	10068	2688	695917	1	1
Male	Obese	TRUE	A	7	1	0	0	24	1	168	30	-865	948	[159,21,180,40]	120.9	0.9653	0.7656	2751	1	1	5466	5121	8991	2694	765184	1	1
Male	Obese	TRUE	A	7	1	0	0	24	2	572	112	-629	900	[548,101,581,121]	141	0.6258	0.4257	4779	2	1	9420	9054	16197	4384	1563670	2	2
Male	Obese	TRUE	A	7	1	0	0	24	3	765	461	-512	691	[756,452,776,475]	134.7	0.9375	0.7758	1893	3	1	3303	3342	4917	1338	634189	3	3
Male	Obese	TRUE	A	7	1	0	0	24	4	67	733	-926	531	[50,713,82,752]	319.6	0.8976	0.5582	1450	5	1	4400	4565	7484	1835	915239	5	4
Male	Obese	TRUE	A	7	1	0	0	24	5	347	752	-760	519	[338,742,358,764]	125.5	0.9321	0.6813	3010	6	1	5342	5141	10029	2075	966982	6	5
Male	Obese	TRUE	A	7	1	0	0	24	6	314	825	-779	476	[301,813,327,838]	186.3	0.9785	0.8029	1168	7	1	3163	2925	5373	1884	411199	7	6
Male	Obese	TRUE	A	7	1	0	0	25	1	648	358	-1227	753	[634,345,663,374]	234.1	0.9943	0.8614	2916	5	1	6961	6401	14374	3080	1468824	4	1
Male	Obese	TRUE	A	7	1	0	0	26	1	476	155	-1975	871	[467,144,485,178]	144.5	0.7422	0.4524	2419	1	1	4591	4643	7177	2124	808004	1	1
Male	Obese	TRUE	A	7	1	0	0	26	2	611	180	-1895	859	[600,170,622,191]	132.5	1.02	0.8105	2894	2	1	6735	6179	11750	3090	875563	2	2
Male	Obese	TRUE	A	7	1	0	0	26	3	574	254	-1917	815	[563,241,586,266]	159.3	0.9834	0.7311	2324	3	1	5199	5451	7744	2134	857880	3	3
Male	Obese	TRUE	A	7	1	0	0	26	4	79	571	-2210	626	[66,558,94,589]	238	0.9376	0.76	741.3	5	1	1766	1670	3463	913	321328	5	4
Male	Obese	TRUE	A	7	1	0	0	26	5	81	1023	-2210	359	[69,1011,93,1036]	170.5	0.9902	0.8645	2173	10	1	6602	6137	11239	3691	699835	8	5
Male	Obese	TRUE	A	7	1	0	0	26	6	147	1019	-2168	361	[140,1008,161,1029]	111.1	0.8989	0.6063	1991	11	1	3882	3749	6482	1933	473543	9	6
Male	Obese	TRUE	A	7	1	0	0	27	1	1019	953	-2298	400	[1009,943,1033,963]	154.3	0.933	0.7724	1708	5	1	3251	3119	6658	1484	617627	4	1
Male	Obese	TRUE	A	7	1	0	0	28	1	1046	221	-2283	188	[1036,211,1056,235]	143.8	0.993	0.7755	1730	1	1	4638	4314	8425	1979	533359	1	1
Male	Obese	TRUE	A	7	1	0	0	28	2	1022	381	-2297	93	[1012,369,1032,394]	137.1	0.8261	0.636	2265	2	1	4397	4133	9514	2011	738624	2	2
Male	Obese	TRUE	A	7	1	0	0	28	3	677	1059	-2501	-309	[664,1046,691,1076]	239.8	0.9806	0.801	1844	3	1	6421	5909	11645	2755	860469	3	3
Male	Obese	TRUE	A	7	1	0	0	28	4	266	76	-2746	275	[252,63,279,90]	212.4	0.98	0.8048	1635	4	1	4321	4045	8702	2124	674001	4	4
Male	Obese	TRUE	A	7	1	0	0	29	1	345	424	-2052	67	[333,412,360,442]	227.8	0.8346	0.6271	2181	1	1	4822	4871	8798	1957	1166887	1	1
Male	Obese	TRUE	A	7	1	0	0	30	1	175	264	-1508	158	[165,254,184,292]	213.8	0.8795	0.4725	2259	2	1	5764	5576	11457	2444	1049068	2	1
Male	Obese	TRUE	A	7	1	0	0	31	1	799	16	-490	309	[787,4,816,34]	215.5	0.9337	0.5252	1891	1	1	5526	5453	10224	2151	906225	1	1
Male	Obese	TRUE	A	7	1	0	0	31	2	116	1033	-895	-293	[101,1020,137,1050]	268.3	0.8663	0.5886	1259	3	1	3382	3165	6807	1472	598549	2	2
Male	Obese	TRUE	A	7	1	0	0	31	3	156	1059	-873	-310	[148,1051,165,1072]	111.8	0.9388	0.7284	2537	4	1	4875	4697	7658	3119	492420	3	3
Male	Obese	TRUE	A	7	1	0	0	32	1	53	282	358	152	[43,267,64,300]	199	0.916	0.5956	2135	1	1	7019	7074	11381	2666	954520	1	1
Male	Obese	TRUE	A	7	1	0	0	32	2	997	864	917	-193	[983,851,1013,878]	227.8	0.9784	0.8135	1484	2	1	4576	4614	8152	2188	636085	2	2
Male	Obese	TRUE	A	7	1	0	0	32	3	929	1060	876	-308	[912,1049,941,1071]	168.4	0.9212	0.5083	1610	3	1	6124	6212	9715	2555	538934	3	3
Male	Obese	TRUE	A	7	1	0	0	33	1	380	294	1196	145	[359,280,395,309]	282.3	0.9841	0.6813	1552	3	1	3380	3482	5439	1524	970056	3	1
Male	Obese	TRUE	A	7	1	0	0	34	1	78	601	1665	-36	[68,587,95,611]	180	0.8624	0.5936	1129	1	1	3708	3885	5839	1497	404119	1	1
Male	Obese	TRUE	A	7	1	0	0	34	2	489	691	1910	-90	[477,678,514,704]	202.5	0.7302	0.4522	3986	2	1	9850	9499	14656	6352	1369210	2	2
Male	Obese	TRUE	A	7	1	0	0	34	3	719	1034	2044	-294	[706,1021,734,1051]	232	0.9619	0.6518	1498	4	1	4781	4421	8144	2171	731462	4	3
Male	Obese	TRUE	A	7	1	0	0	37	1	305	335	1799	-525	[297,327,316,343]	104.4	0.9188	0.7534	2678	1	1	6535	6872	8789	2761	607757	1	1
Male	Obese	TRUE	A	7	1	0	0	37	2	946	945	2179	-887	[938,937,955,957]	102	0.9854	0.7396	2105	4	1	3379	3371	5987	1507	456103	4	2
Male	Obese	TRUE	A	7	1	0	0	37	3	173	951	1721	-891	[161,939,187,965]	190.2	0.9752	0.7953	1951	5	1	4012	4090	5902	1760	854550	5	3
Male	Obese	TRUE	A	7	1	0	0	37	4	753	1027	2064	-935	[742,1014,764,1039]	128.7	0.9462	0.4859	2148	7	1	5700	5020	11143	2951	530136	6	4
Male	Obese	TRUE	A	7	1	0	0	38	1	157	56	1065	-359	[146,45,169,66]	136.4	0.98	0.7546	4030	1	1	9415	8986	17090	3951	1214580	1	1
Male	Obese	TRUE	A	7	1	0	0	38	2	237	115	1113	-394	[226,105,249,125]	139.6	0.9755	0.7639	1153	2	1	2321	2207	4799	1355	315619	2	2
Male	Obese	TRUE	A	7	1	0	0	38	3	601	852	1329	-832	[591,840,612,863]	116	0.9055	0.6637	2317	6	1	4093	4290	5886	2706	515687	6	3
Male	Obese	TRUE	A	7	1	0	0	39	1	612	120	691	-399	[600,109,634,137]	229.9	0.8718	0.562	1595	1	1	5231	5027	9940	3161	601598	1	1
Male	Obese	TRUE	A	7	1	0	0	39	2	357	389	539	-557	[347,380,369,400]	138.9	0.9217	0.8004	1734	2	1	3443	3337	6110	1496	561280	2	2
Male	Obese	TRUE	A	7	1	0	0	39	3	910	524	865	-637	[901,514,919,537]	118.5	0.9533	0.6773	2362	4	1	5511	5398	9907	2948	529056	4	3
Male	Obese	TRUE	A	7	1	0	0	39	4	771	755	783	-774	[762,743,781,768]	133.6	0.9861	0.6703	3202	5	1	7126	7427	11210	2472	1068930	5	4
Male	Obese	TRUE	A	7	1	0	0	39	5	925	839	874	-824	[911,826,937,852]	189.1	0.9872	0.722	2330	7	1	7119	6633	12780	2804	989552	7	5
Male	Obese	TRUE	A	7	1	0	0	39	6	944	1035	888	-940	[933,1023,962,1047]	199.3	0.944	0.7343	2002	8	1	5204	5155	8792	1967	947135	8	6
Male	Obese	TRUE	A	7	1	0	0	41	1	781	666	-503	-720	[770,653,792,677]	152.2	0.9739	0.8193	2036	2	1	6029	5790	10366	2979	578789	2	1
Male	Obese	TRUE	A	7	1	0	0	42	1	1047	488	-990	-616	[1030,476,1063,503]	224	0.9166	0.5445	1854	2	1	5791	5857	10638	2566	868718	1	1
Male	Obese	TRUE	A	7	1	0	0	42	2	797	839	-1139	-823	[784,825,809,851]	174	0.97	0.742	2562	4	1	9093	9543	14528	3307	1009330	3	2
Male	Obese	TRUE	A	7	1	0	0	42	3	1039	340	-996	-528	[1026,327,1052,356]	194.4	1.003	0.7096	1687	5	1	4072	3959	6618	2602	557868	4	3
Male	Obese	TRUE	A	7	1	0	0	42	4	532	1045	-1297	-946	[515,1031,547,1060]	254.5	0.9754	0.6986	1761	6	1	4201	4437	7868	1560	1067040	5	4
Male	Obese	TRUE	A	7	1	0	0	43	1	1004	527	-1662	-640	[995,518,1013,541]	134.3	0.9532	0.7392	2680	1	1	6912	6971	11178	3283	794866	1	1
Male	Obese	TRUE	A	7	1	0	0	43	2	255	547	-2103	-651	[244,536,275,559]	209.2	0.9436	0.6757	2166	2	1	4808	4825	7355	3262	822137	2	2
Male	Obese	TRUE	A	7	1	0	0	44	1	206	211	-2781	-451	[196,195,215,227]	158.9	0.9039	0.4961	2918	2	1	8179	7456	18191	3577	1096030	1	1
Male	Obese	TRUE	A	7	1	0	0	44	2	132	918	-2825	-870	[121,907,144,930]	153.3	1.031	0.8785	2732	7	1	5959	5951	8242	4082	726947	4	2
Male	Obese	TRUE	A	7	1	0	0	45	1	338	581	-2058	-1317	[321,570,349,594]	187	0.9962	0.7845	2102	1	1	6990	7109	10999	3774	615152	1	1
Male	Obese	TRUE	A	7	1	0	0	45	2	770	656	-1799	-1362	[757,642,790,674]	241.5	0.9458	0.566	1595	2	1	4081	3608	7985	2297	457055	2	2
Male	Obese	TRUE	A	7	1	0	0	46	1	17	159	-1596	-1066	[6,149,45,170]	203.9	0.7423	0.3959	1093	1	1	3196	3078	5299	1575	389862	1	1
Male	Obese	TRUE	A	7	1	0	0	46	2	248	398	-1464	-1208	[237,385,259,410]	148.7	0.9439	0.706	2883	2	1	7198	6471	12575	3709	885384	2	2
Male	Obese	TRUE	A	7	1	0	0	46	3	767	712	-1157	-1394	[756,701,777,723]	134.3	0.9892	0.7373	3500	3	1	7170	6898	11303	4187	1025360	3	3
Male	Obese	TRUE	A	7	1	0	0	46	4	712	766	-1189	-1425	[702,753,722,777]	135.7	0.977	0.7022	1851	4	1	5543	6071	8522	2607	504444	4	4
Male	Obese	TRUE	A	7	1	0	0	47	1	384	911	-735	-1513	[367,899,410,928]	293.9	0.9039	0.4673	1193	2	1	2956	2914	6380	1309	747965	2	1
Male	Obese	TRUE	A	7	1	0	0	48	1	1061	93	309	-1028	[1051,82,1071,109]	149.4	0.9466	0.6007	1866	1	1	5515	5381	9882	2070	650756	1	1
Male	Obese	TRUE	A	7	1	0	0	48	2	57	342	-285	-1175	[40,331,76,355]	237.3	0.8884	0.5468	1916	2	1	4762	4251	8366	2559	695309	2	2
Male	Obese	TRUE	A	7	1	0	0	48	3	807	631	159	-1347	[797,619,818,645]	156.5	0.8955	0.6501	2869	5	1	6005	6310	9514	2110	1134990	5	3
Male	Obese	TRUE	A	7	1	0	0	48	4	917	965	225	-1537	[905,925,930,981]	366.3	0.7729	0.3557	917.7	6	1	2222	2281	3551	1051	677783	6	4
Male	Obese	TRUE	A	7	1	0	0	50	1	614	88	1336	-1026	[605,79,624,103]	131.5	1.015	0.7159	1614	1	1	3215	3181	6420	1453	437289	1	1
Male	Obese	TRUE	A	7	1	0	0	50	2	673	920	1372	-1521	[665,911,687,941]	175.8	0.8627	0.4851	1672	2	1	4208	4063	6408	2656	483959	2	2
Male	Obese	TRUE	A	7	1	0	0	50	3	838	948	1469	-1534	[827,937,851,959]	162.4	0.995	0.8504	1999	3	1	4836	5066	7380	1689	793047	3	3
Male	Obese	TRUE	A	7	1	0	0	50	4	93	974	1027	-1549	[82,963,106,985]	142.7	0.9371	0.7177	1166	4	1	2634	2566	4275	1651	247609	4	4
Male	Obese	TRUE	A	7	1	0	0	50	5	895	1053	1502	-1597	[882,1042,906,1066]	139.9	0.9951	0.7342	1931	6	1	4501	4214	7787	2340	504142	6	5
Male	Obese	TRUE	A	7	1	0	0	51	1	894	258	2148	-1126	[879,243,911,275]	276.3	1.01	0.838	1514	3	1	3783	3671	6392	2236	684672	3	1
Male	Obese	TRUE	A	7	1	0	0	51	2	112	356	1684	-1184	[98,339,129,373]	263.7	0.9577	0.7205	1630	4	1	4573	4774	7486	2103	914632	4	2
Male	Obese	TRUE	A	7	1	0	0	51	3	658	670	2008	-1369	[646,658,670,681]	160.3	0.9545	0.793	2557	7	1	6377	5855	11717	3613	841712	7	3
Male	Obese	TRUE	A	7	1	0	0	51	4	244	776	1762	-1433	[233,763,257,791]	191.6	0.9358	0.6667	1395	8	1	3709	3301	7095	1905	530452	8	4
Male	Obese	TRUE	A	7	1	0	0	52	1	20	81	1629	-1666	[9,70,31,93]	153.6	0.9151	0.7367	2112	1	1	6370	5988	11641	2710	656077	1	1
Male	Obese	TRUE	A	7	1	0	0	52	2	984	264	2200	-1775	[970,254,994,276]	145.6	0.9823	0.7627	2192	3	1	5157	4755	9918	3339	469306	3	2
Male	Obese	TRUE	A	7	1	0	0	52	3	450	1063	1885	-2248	[441,1053,459,1072]	107.2	0.9533	0.7262	1637	6	1	3051	2926	5348	1262	424089	6	3
Male	Obese	TRUE	A	7	1	0	0	53	1	1024	586	1579	-1966	[1010,575,1036,600]	151.9	0.8655	0.6282	1748	1	1	4992	4927	8850	2836	499162	1	1
Male	Obese	TRUE	A	7	1	0	0	53	2	729	899	1404	-2151	[708,884,749,915]	287.2	0.852	0.4424	1489	2	1	4080	4010	7243	1713	930185	2	2
Male	Obese	TRUE	A	7	1	0	0	54	1	456	568	596	-1956	[445,555,467,585]	182.5	0.9369	0.6472	1569	1	1	4660	4954	7013	2288	559185	1	1
Male	Obese	TRUE	A	7	1	0	0	54	2	657	724	716	-2047	[645,712,672,737]	197.2	0.9963	0.8707	1695	2	1	4539	4186	7561	2263	630927	2	2
Male	Obese	TRUE	A	7	1	0	0	55	1	168	200	-217	-1731	[152,173,197,211]	286.2	0.74	0.3365	1451	4	1	5219	5028	9179	3028	2380090	4	1
Male	Obese	TRUE	A	7	1	0	0	55	2	413	576	-75	-1960	[405,568,423,588]	106.2	0.9676	0.7577	2193	8	1	2944	3075	4429	1253	612430	8	2
Male	Obese	TRUE	A	7	1	0	0	55	3	302	1035	-140	-2232	[291,1023,316,1047]	173.3	0.9523	0.7121	1361	10	1	3852	3516	6688	1728	469885	10	3
Male	Obese	TRUE	A	7	1	0	0	56	1	280	214	-799	-1744	[269,203,291,225]	131.5	1.035	0.8274	2974	1	1	6955	6703	10065	4810	744226	1	1
Male	Obese	TRUE	A	7	1	0	0	56	2	499	854	-669	-2123	[490,840,510,866]	149.4	0.915	0.5842	1504	2	1	4230	3937	7517	1978	452626	2	2
Male	Obese	TRUE	A	7	1	0	0	57	1	1047	524	-993	-1929	[1026,513,1060,537]	232.7	0.9253	0.5841	1740	2	1	5521	5456	9636	2290	778424	1	1
Male	Obese	TRUE	A	7	1	0	0	58	1	890	175	-1730	-1722	[880,166,900,188]	135.4	0.9404	0.7674	1277	1	1	3281	3377	5629	1386	354393	1	1
Male	Obese	TRUE	A	7	1	0	0	58	2	827	673	-1767	-2017	[817,656,839,687]	172.3	0.8649	0.522	2063	5	1	5544	5913	8080	2982	781749	5	2
Male	Obese	TRUE	A	7	1	0	0	58	3	785	199	-1791	-1736	[772,186,802,214]	228.2	0.9932	0.8183	1865	8	1	5008	4697	9030	2237	891422	7	3
Male	Obese	TRUE	A	7	1	0	0	59	1	684	140	-560	-2346	[673,127,695,151]	149.1	0.9964	0.8158	2505	2	1	4351	4055	8452	1854	813633	2	1
Male	Obese	TRUE	A	7	1	0	0	59	2	469	959	-688	-2834	[458,950,481,979]	151.2	0.8107	0.5	3476	9	1	6855	6557	10264	5096	1131010	9	3
Male	Obese	TRUE	A	7	1	0	0	60	1	190	209	-205	-2388	[180,200,206,219]	146.6	0.9691	0.6877	3199	1	1	9216	9270	17283	3721	1069020	1	1
Male	Obese	TRUE	A	7	1	0	0	60	2	494	714	-27	-2687	[480,704,509,725]	180.7	0.946	0.6381	2211	4	1	7211	7494	12809	3057	822033	4	2
Male	Obese	TRUE	A	7	1	0	0	60	3	937	955	238	-2830	[927,945,954,966]	172.6	0.9974	0.732	2139	5	1	4784	4137	9988	3003	731900	5	3
Male	Obese	TRUE	A	7	1	0	0	61	1	423	56	577	-2297	[411,45,435,69]	157.2	1.01	0.8138	1192	1	1	3591	3440	6622	1619	373423	1	1
Male	Obese	TRUE	A	8	1	0	0	1	1	261	22	-165	306	[249,10,274,38]	204.3	0.9866	0.8313	2363	1	1	7083	7212	12669	2864	1012850	1	1
Male	Obese	TRUE	A	8	1	0	0	1	2	140	453	-232	50	[127,443,173,470]	309	0.7452	0.427	1631	3	1	4357	4477	7138	1675	1163190	3	2
Male	Obese	TRUE	A	8	1	0	0	1	3	770	709	136	-103	[757,697,782,732]	213.8	0.9291	0.5411	2373	4	1	8815	8334	18020	3343	1119460	4	3
Male	Obese	TRUE	A	8	1	0	0	1	4	1047	775	299	-140	[1026,767,1059,787]	147.3	0.836	0.415	3422	5	1	9519	9257	16728	4514	1494530	5	4
Male	Obese	TRUE	A	8	1	0	0	1	5	1033	788	295	-147	[1024,776,1053,799]	142.7	0.89	0.4734	1755	6	1	9519	9257	16728	4514	1494530	6	5
Male	Obese	TRUE	A	8	1	0	0	1	6	693	926	89	-232	[675,918,702,944]	155.4	0.8638	0.402	2652	8	1	7111	6172	12635	3485	924478	8	6
Male	Obese	TRUE	A	8	1	0	0	2	1	471	561	-687	2570	[456,545,485,576]	245	0.9932	0.7458	2209	2	1	8813	8497	15788	3738	1057530	2	1
Male	Obese	TRUE	A	8	1	0	0	2	2	590	623	-615	2534	[577,610,607,637]	230.3	1.013	0.8312	2508	3	1	7322	7556	13167	2728	1310620	3	2
Male	Obese	TRUE	A	8	1	0	0	2	3	600	783	-610	2439	[589,772,612,795]	158.9	0.9992	0.8884	3273	5	1	9570	8777	18543	3993	1157960	5	3
Male	Obese	TRUE	A	8	1	0	0	2	4	555	1042	-637	2285	[542,1028,569,1055]	208.1	0.9685	0.8634	1857	7	1	5077	4923	9245	2090	847782	7	4
Male	Obese	TRUE	A	8	1	0	0	3	1	117	85	-253	2854	[96,72,126,95]	161.4	0.8438	0.5213	2514	3	1	6794	6490	13889	2599	1155040	2	1
Male	Obese	TRUE	A	8	1	0	0	3	2	832	121	174	2830	[823,110,841,137]	145.9	0.9663	0.6595	3361	4	1	8693	8871	15332	3248	1173550	3	2
Male	Obese	TRUE	A	8	1	0	0	3	3	596	578	34	2559	[586,568,607,593]	162.4	0.9308	0.7141	3243	7	1	9424	8306	23669	4064	1149790	6	3
Male	Obese	TRUE	A	8	1	0	0	3	4	660	814	72	2419	[649,803,672,828]	183.5	0.9547	0.7781	2321	8	1	7898	7393	16127	2917	995185	7	4
Male	Obese	TRUE	A	8	1	0	0	3	5	903	820	216	2417	[891,807,918,833]	186.7	0.9645	0.6566	1519	9	1	4955	4806	8708	2229	564901	8	5
Male	Obese	TRUE	A	8	1	0	0	3	6	293	839	-146	2405	[282,828,305,853]	171.6	0.9776	0.8153	2735	10	1	7300	6976	14253	2903	1102310	9	6
Male	Obese	TRUE	A	8	1	0	0	3	7	528	843	-8	2403	[513,833,538,854]	157.2	0.9756	0.7879	3072	11	1	7175	7595	12368	2797	1147920	10	7
Male	Obese	TRUE	A	8	1	0	0	3	8	789	970	149	2323	[777,957,803,1000]	315.7	0.8912	0.5595	1330	12	1	6023	5984	9659	2881	680642	11	8
Male	Obese	TRUE	A	8	1	0	0	4	1	438	109	585	2838	[425,98,449,122]	171.9	0.963	0.7869	1891	1	1	3403	3176	6840	1939	721428	1	1
Male	Obese	TRUE	A	8	1	0	0	4	2	87	133	378	2824	[76,122,99,146]	150.8	1.022	0.8254	1270	2	1	3043	2906	4944	1717	374338	2	2
Male	Obese	TRUE	A	8	1	0	0	4	3	100	153	385	2812	[80,141,115,166]	226.1	0.9343	0.6423	2285	3	1	9271	8548	17216	4152	991967	3	3
Male	Obese	TRUE	A	8	1	0	0	4	4	162	449	422	2637	[150,435,175,461]	170.5	1.024	0.7533	3254	4	1	11950	11410	22704	4892	1159140	4	4
Male	Obese	TRUE	A	8	1	0	0	4	5	523	693	637	2492	[511,681,536,707]	167	0.9313	0.6192	2992	5	1	10159	9079	18839	4387	1026100	5	5
Male	Obese	TRUE	A	8	1	0	0	4	6	900	702	860	2486	[890,691,910,717]	147	0.9879	0.6542	2538	6	1	6771	6406	14010	3098	778620	6	6
Male	Obese	TRUE	A	8	1	0	0	4	7	849	730	826	2469	[824,719,861,745]	206.4	0.8729	0.4338	3633	7	1	10452	10389	18556	3889	1735080	7	7
Male	Obese	TRUE	A	8	1	0	0	4	8	486	182	613	2794	[470,168,501,201]	255.9	0.9916	0.6727	1828	8	1	5896	5838	10243	2360	984554	8	8
Male	Obese	TRUE	A	8	1	0	0	5	1	465	15	1893	2247	[451,3,477,32]	215.2	0.9734	0.6895	2642	1	1	10465	10260	18308	4079	1245370	1	1
Male	Obese	TRUE	A	8	1	0	0	5	2	834	292	2112	2083	[817,268,847,317]	356.1	0.7963	0.4613	1885	3	1	7431	7864	14733	2619	1411960	3	2
Male	Obese	TRUE	A	8	1	0	0	5	3	129	671	1696	1860	[116,658,149,684]	227.5	0.9377	0.6779	1466	5	1	4548	4601	7707	1899	668529	5	3
Male	Obese	TRUE	A	8	1	0	0	5	4	774	1045	2075	1636	[758,1033,787,1065]	209.5	0.8351	0.4449	1417	6	1	5649	5456	10930	2164	615717	6	4
Male	Obese	TRUE	A	8	1	0	0	6	1	567	245	1310	2111	[552,228,590,264]	321	0.8999	0.51	1613	1	1	6849	7352	11815	2486	1054726	1	1
Male	Obese	TRUE	A	8	1	0	0	7	1	668	368	722	2039	[653,349,681,387]	250.3	0.9054	0.5363	1421	1	1	6364	5661	12158	3157	617266	1	1
Male	Obese	TRUE	A	8	1	0	0	7	2	824	390	819	2026	[812,379,853,402]	263	0.8767	0.5386	2561	2	1	8935	8826	17206	4138	1331350	2	2
Male	Obese	TRUE	A	8	1	0	0	7	3	142	618	410	1891	[128,608,153,630]	162.4	0.9462	0.7436	3185	3	1	9727	10177	17192	3782	1167230	3	3
Male	Obese	TRUE	A	8	1	0	0	7	4	685	689	731	1845	[668,676,698,716]	286.5	0.9224	0.5861	942.3	4	1	2206	2160	4011	1156	547091	4	4
Male	Obese	TRUE	A	8	1	0	0	7	5	284	807	494	1778	[271,795,297,823]	218	0.9669	0.827	2036	5	1	6791	5876	13653	4292	624761	5	5
Male	Obese	TRUE	A	8	1	0	0	7	6	221	899	457	1724	[211,889,232,911]	125.5	0.987	0.7574	3702	6	1	7924	7128	17605	3209	1125220	6	6
Male	Obese	TRUE	A	8	1	0	0	7	7	639	1047	705	1634	[625,1033,653,1073]	298.8	0.9128	0.5741	1484	7	1	6614	6073	13233	2715	873106	7	7
Male	Obese	TRUE	A	8	1	0	0	7	8	984	1018	909	1653	[966,1002,1001,1037]	333.6	0.8912	0.6966	1831	8	1	8397	7911	14493	4710	990871	8	8
Male	Obese	TRUE	A	8	1	0	0	8	1	767	129	134	2180	[751,114,785,147]	286.5	0.9927	0.642	1952	1	1	7606	7696	12849	3314	1011530	1	1
Male	Obese	TRUE	A	8	1	0	0	8	2	667	336	76	2055	[656,325,678,359]	222.5	0.9385	0.6045	1506	2	1	6649	6782	12020	2962	698105	2	2
Male	Obese	TRUE	A	8	1	0	0	8	3	592	426	32	2005	[582,416,602,436]	118.8	1.014	0.7694	2863	3	1	6622	6829	10822	3038	801313	3	3
Male	Obese	TRUE	A	8	1	0	0	8	4	544	751	3	1812	[527,741,561,761]	207.4	0.9	0.5639	2552	6	1	6471	6544	10945	2826	1158250	6	4
Male	Obese	TRUE	A	8	1	0	0	8	5	967	993	254	1666	[949,979,987,1009]	252.1	0.8868	0.5599	1627	8	1	6432	6077	13973	2854	778222	8	5
Male	Obese	TRUE	A	8	1	0	0	8	6	948	1022	242	1651	[934,1007,961,1040]	235.9	0.9581	0.732	1394	9	1	5954	5307	13690	3042	643073	9	6
Male	Obese	TRUE	A	8	1	0	0	9	1	159	50	-871	2225	[150,37,168,69]	175.8	0.8888	0.5176	2197	1	1	6302	6322	11157	2343	882236	1	1
Male	Obese	TRUE	A	8	1	0	0	9	2	530	348	-652	2048	[521,340,538,367]	139.9	0.9099	0.5726	2560	2	1	7483	6979	14491	3315	778193	2	2
Male	Obese	TRUE	A	8	1	0	0	9	3	257	385	-813	2032	[247,364,271,396]	202.9	0.8759	0.5318	3015	3	1	11481	11676	18571	4204	1354730	3	3
Male	Obese	TRUE	A	8	1	0	0	9	4	1040	530	-350	1943	[1024,518,1054,543]	212.7	1.01	0.7396	1334	4	1	3836	3801	8309	1746	544757	4	4
Male	Obese	TRUE	A	8	1	0	0	10	1	613	294	-1248	2083	[602,283,627,306]	166.3	0.9755	0.7766	3084	2	1	10102	9759	20716	4081	1121370	2	2
Male	Obese	TRUE	A	8	1	0	0	10	2	793	293	-1141	2083	[781,284,803,303]	130.8	0.9556	0.7689	3872	3	1	10541	9224	24491	4263	1180610	3	3
Male	Obese	TRUE	A	8	1	0	0	10	3	582	619	-1268	1889	[564,605,595,634]	231.7	0.8871	0.6744	2143	5	1	7964	7831	13232	3814	756623	5	4
Male	Obese	TRUE	A	8	1	0	0	10	4	668	801	-1216	1781	[651,786,683,820]	252.8	0.9587	0.6484	1603	7	1	3428	3480	5706	1617	826055	7	5
Male	Obese	TRUE	A	8	1	0	0	10	5	242	914	-1468	1714	[227,900,256,934]	279.1	0.9536	0.7588	1592	9	1	6529	6167	11817	3389	796494	8	6
Male	Obese	TRUE	A	8	1	0	0	10	6	540	1026	-1289	1649	[522,1013,565,1039]	281.3	0.8807	0.4795	1073	10	1	4163	4125	7104	1724	566212	9	7
Male	Obese	TRUE	A	8	1	0	0	11	1	22	322	-2243	2066	[7,313,40,333]	167	0.8616	0.4866	2596	2	1	9440	8735	21192	4013	849589	1	1
Male	Obese	TRUE	A	8	1	0	0	11	2	669	858	-1862	1749	[657,843,681,870]	180.4	0.9907	0.7569	2534	6	1	7214	7307	12563	2602	1082160	5	2
Male	Obese	TRUE	A	8	1	0	0	12	1	218	447	-2127	1346	[207,436,231,459]	163.5	1.016	0.8626	2525	1	1	7971	7419	14780	3438	908638	1	1
Male	Obese	TRUE	A	8	1	0	0	12	2	548	511	-1932	1307	[538,500,559,527]	165.2	0.9559	0.6957	1508	2	1	3702	3727	6034	1643	521961	2	2
Male	Obese	TRUE	A	8	1	0	0	12	3	615	731	-1892	1178	[605,721,626,741]	133.2	0.9487	0.8127	2763	3	1	7772	7794	12407	3361	753913	3	3
Male	Obese	TRUE	A	8	1	0	0	13	1	616	114	-1246	1543	[604,102,629,127]	178.2	0.9999	0.8414	1506	1	1	3716	3349	6605	2364	520179	1	1
Male	Obese	TRUE	A	8	1	0	0	13	2	979	523	-1031	1301	[967,512,991,535]	163.8	1	0.8937	2767	4	1	9702	9088	17570	4279	931344	4	2
Male	Obese	TRUE	A	8	1	0	0	13	3	817	759	-1126	1163	[806,745,833,771]	195.1	0.9053	0.6902	1222	6	1	3786	3568	7640	1724	431605	6	3
Male	Obese	TRUE	A	8	1	0	0	13	4	556	567	-1281	1275	[541,553,572,582]	264	0.9708	0.8169	1704	8	1	7466	6653	16677	3516	903389	7	4
Male	Obese	TRUE	A	8	1	0	0	14	1	498	357	-668	1400	[485,344,522,371]	262.6	0.9554	0.66	2183	1	1	7680	7523	13674	3096	1198150	1	1
Male	Obese	TRUE	A	8	1	0	0	14	2	332	682	-768	1207	[319,670,346,694]	182.8	0.9987	0.8123	2248	2	1	9182	8871	17218	3607	853896	2	2
Male	Obese	TRUE	A	8	1	0	0	14	3	555	1050	-637	987	[543,1039,567,1070]	198.6	0.902	0.669	2809	3	1	6723	6701	11918	2568	1358070	3	3
Male	Obese	TRUE	A	8	1	0	0	14	4	466	875	-688	1092	[453,862,484,889]	247.2	0.9982	0.8107	973.7	4	1	2429	2245	4167	1340	422660	4	4
Male	Obese	TRUE	A	8	1	0	0	15	1	14	99	-310	1552	[3,88,31,111]	185.6	1.008	0.7555	2258	1	1	7079	6947	12196	2685	962759	1	1
Male	Obese	TRUE	A	8	1	0	0	15	2	724	333	108	1413	[707,320,737,353]	213.4	0.9029	0.4405	2164	2	1	9853	8799	21936	4166	945879	2	2
Male	Obese	TRUE	A	8	1	0	0	15	3	856	968	188	1037	[840,959,874,979]	200.4	0.9068	0.5185	2299	3	1	7818	8294	12359	3072	969404	3	3
Male	Obese	TRUE	A	8	1	0	0	15	4	164	1045	-223	991	[153,1034,175,1058]	154.7	0.9501	0.7766	2573	4	1	5598	5580	10118	1983	1007610	4	4
Male	Obese	TRUE	A	8	1	0	0	15	5	710	749	102	1166	[697,736,725,766]	240.1	0.9425	0.7479	2321	5	1	10621	10837	18285	4344	1104610	5	5
Male	Obese	TRUE	A	8	1	0	0	16	1	891	203	854	1493	[877,177,907,217]	269	0.8379	0.466	1969	1	1	9657	9836	16866	3978	888443	1	1
Male	Obese	TRUE	A	8	1	0	0	16	2	110	424	391	1359	[94,410,125,443]	269.7	0.9957	0.7008	1977	2	1	9292	8701	17561	3900	994238	2	2
Male	Obese	TRUE	A	8	1	0	0	16	3	216	494	455	1319	[198,481,239,507]	279.9	0.8484	0.5144	1443	3	1	5353	5249	10079	2784	706573	3	3
Male	Obese	TRUE	A	8	1	0	0	16	4	599	885	681	1088	[586,867,614,899]	225.7	0.9731	0.6131	1545	4	1	4985	4815	8823	2141	647991	4	4
Male	Obese	TRUE	A	8	1	0	0	17	1	665	184	1366	1499	[655,174,676,204]	188.1	0.9396	0.6474	2056	1	1	8453	7499	16130	3745	760739	1	1
Male	Obese	TRUE	A	8	1	0	0	17	2	350	241	1178	1468	[336,230,362,256]	197.2	0.9521	0.7098	2699	2	1	6071	5741	10840	2371	1262700	2	2
Male	Obese	TRUE	A	8	1	0	0	17	3	463	712	1247	1189	[451,700,477,725]	189.5	1.02	0.8694	2801	4	1	9386	9728	16282	3510	1238970	4	3
Male	Obese	TRUE	A	8	1	0	0	17	4	1040	753	1588	1165	[1026,739,1054,768]	233.4	0.9788	0.8	1530	5	1	5224	4929	9716	2481	637273	5	4
Male	Obese	TRUE	A	8	1	0	0	17	5	199	751	1090	1165	[186,741,213,763]	171.6	0.9465	0.6957	2909	6	1	6708	6975	12031	2415	1227510	6	5
Male	Obese	TRUE	A	8	1	0	0	17	6	462	1022	1246	1004	[450,1010,474,1039]	211.6	0.964	0.7926	1960	7	1	5488	5235	11656	2359	878060	7	6
Male	Obese	TRUE	A	8	1	0	0	18	1	713	145	2041	1525	[702,134,725,157]	150.8	1.003	0.8414	2443	1	1	5930	5514	12878	2875	764949	1	1
Male	Obese	TRUE	A	8	1	0	0	18	2	29	215	1635	1482	[18,204,41,233]	178.6	0.9542	0.6756	2371	2	1	5487	5279	10027	2183	680328	2	2
Male	Obese	TRUE	A	8	1	0	0	18	3	806	291	2097	1439	[796,281,821,302]	144.5	0.944	0.7177	3223	3	1	10324	10523	18111	4047	1238880	3	3
Male	Obese	TRUE	A	8	1	0	0	18	4	67	367	1656	1395	[53,345,79,384]	256.3	0.8634	0.4851	2181	5	1	7991	6863	17123	3967	1022860	5	5
Male	Obese	TRUE	A	8	1	0	0	18	5	781	785	2083	1146	[770,774,798,797]	186.7	1.011	0.7845	2704	8	1	6996	7059	11525	2970	1077310	8	6
Male	Obese	TRUE	A	8	1	0	0	18	6	742	982	2058	1029	[730,970,754,995]	168.8	0.968	0.819	2156	10	1	7670	7522	14207	2808	813028	10	7
Male	Obese	TRUE	A	8	1	0	0	19	1	738	633	2701	588	[728,623,748,649]	160	0.9224	0.6631	2913	2	1	8912	8388	14765	4837	953568	1	1
Male	Obese	TRUE	A	8	1	0	0	19	2	498	636	2559	588	[488,620,509,651]	166.6	0.9608	0.592	2638	3	1	8212	8450	14374	3067	1034680	2	2
Male	Obese	TRUE	A	8	1	0	0	20	1	486	277	1906	801	[469,261,503,294]	325.6	0.9278	0.7793	3093	2	1	10671	10036	18957	4622	2048730	1	1
Male	Obese	TRUE	A	8	1	0	0	20	2	19	497	1629	670	[6,482,32,514]	232.7	1.019	0.7538	2456	4	1	6667	7179	11046	2589	1360060	3	2
Male	Obese	TRUE	A	8	1	0	0	20	3	503	776	1917	505	[490,765,519,788]	187.7	0.9828	0.6727	1895	6	1	6280	5897	12255	2435	791323	5	3
Male	Obese	TRUE	A	8	1	0	0	20	4	911	85	2158	915	[899,73,923,98]	187	0.9655	0.8048	2551	7	1	8248	8524	15304	3046	1096960	6	4
Male	Obese	TRUE	A	8	1	0	0	21	1	95	253	1030	816	[73,243,121,264]	235.2	0.7381	0.4038	1611	1	1	7513	7322	15659	2985	706216	1	1
Male	Obese	TRUE	A	8	1	0	0	21	2	1062	1027	1601	358	[1051,1010,1071,1039]	139.9	0.8646	0.4969	2806	5	1	6671	6990	12042	2282	980577	5	2
Male	Obese	TRUE	A	8	1	0	0	21	3	141	159	1054	870	[118,145,163,179]	324.2	0.9051	0.4056	1004	6	1	3065	2959	5231	1447	548575	6	3
Male	Obese	TRUE	A	8	1	0	0	21	4	869	671	1487	567	[856,658,884,686]	239.1	0.9277	0.7655	2009	7	1	7853	6915	16876	3037	997349	7	4
Male	Obese	TRUE	A	8	1	0	0	22	1	651	381	712	740	[638,370,665,392]	159.3	0.9199	0.5747	2462	1	1	7714	7685	14235	3071	840842	1	1
Male	Obese	TRUE	A	8	1	0	0	22	2	144	398	413	726	[133,385,160,422]	239.8	0.8825	0.4777	1170	2	1	3183	2915	7567	1602	528447	2	2
Male	Obese	TRUE	A	8	1	0	0	22	3	252	723	478	537	[239,709,278,735]	247.9	0.8566	0.4501	2013	3	1	8545	8831	16420	3068	1085250	3	3
Male	Obese	TRUE	A	8	1	0	0	22	4	524	571	638	627	[509,559,543,584]	233.1	0.9645	0.6584	2536	6	1	7023	6582	14400	3005	1242990	6	5
Male	Obese	TRUE	A	8	1	0	0	23	1	995	78	271	919	[984,69,1010,88]	137.5	0.9846	0.6498	2524	1	1	6683	6584	12450	2536	795251	1	1
Male	Obese	TRUE	A	8	1	0	0	23	2	1029	601	290	609	[1015,587,1045,616]	241.5	0.9715	0.76	1536	2	1	4607	4861	7443	1818	792436	2	2
Male	Obese	TRUE	A	8	1	0	0	24	1	55	177	-933	857	[45,161,65,204]	253.8	0.8382	0.4585	995.1	1	1	3751	3361	6750	1636	446354	1	1
Male	Obese	TRUE	A	8	1	0	0	24	2	790	243	-498	821	[776,225,802,261]	236.6	0.9469	0.5858	2432	2	1	8731	9383	15301	3176	1318450	2	2
Male	Obese	TRUE	A	8	1	0	0	24	3	769	858	-509	456	[758,847,782,872]	174.7	0.9568	0.7349	1930	3	1	6379	6545	10963	2543	739974	3	3
Male	Obese	TRUE	A	8	1	0	0	24	4	900	867	-432	451	[885,853,914,881]	238.7	0.9917	0.8081	1911	4	1	7672	6939	16300	4119	836263	4	4
Male	Obese	TRUE	A	8	1	0	0	24	5	788	549	-497	638	[766,533,813,575]	370.6	0.8474	0.3948	917.4	5	1	3115	3019	5920	1347	619841	5	5
Male	Obese	TRUE	A	8	1	0	0	24	6	168	742	-866	525	[149,720,186,763]	331.5	0.8601	0.4126	1272	6	1	6475	6556	10796	2646	686311	6	6
Male	Obese	TRUE	A	8	1	0	0	25	1	717	580	-1186	621	[703,566,731,600]	259.1	0.9359	0.7004	3816	4	1	12705	12912	25250	4365	2401290	4	1
Male	Obese	TRUE	A	8	1	0	0	25	2	369	651	-1393	579	[357,635,380,664]	177.5	0.9361	0.6737	2338	5	1	7604	7227	14262	3339	882033	5	2
Male	Obese	TRUE	A	8	1	0	0	25	3	44	937	-1585	408	[33,926,56,953]	184.9	0.9896	0.6807	2570	6	1	8176	7324	15925	4407	940210	6	3
Male	Obese	TRUE	A	8	1	0	0	26	1	782	419	-1793	717	[768,405,799,435]	230.6	0.9995	0.6616	2076	1	1	7449	7798	13341	3065	1005580	1	1
Male	Obese	TRUE	A	8	1	0	0	26	2	373	428	-2036	713	[358,416,386,438]	160.7	0.9248	0.5547	3188	2	1	10234	10147	17293	4854	1105300	2	2
Male	Obese	TRUE	A	8	1	0	0	26	3	933	470	-1704	686	[921,458,945,483]	179.3	0.9716	0.7229	1381	3	1	4547	4436	8017	2114	436494	3	3
Male	Obese	TRUE	A	8	1	0	0	26	4	448	601	-1990	608	[437,590,464,615]	207.8	0.9136	0.7217	2136	5	1	8653	7726	16579	3870	856670	5	4
Male	Obese	TRUE	A	8	1	0	0	26	5	41	642	-2232	584	[32,633,51,656]	128.7	0.9288	0.6819	3321	6	1	6743	6751	11889	2235	1045110	6	5
Male	Obese	TRUE	A	8	1	0	0	26	6	685	948	-1850	404	[671,937,701,960]	207.4	0.9526	0.6574	1790	7	1	7443	6892	15752	3001	751729	7	6
Male	Obese	TRUE	A	8	1	0	0	26	7	649	190	-1872	853	[636,177,664,203]	219.7	0.9715	0.824	2122	8	1	6296	5693	12465	3348	893964	8	7
Male	Obese	TRUE	A	8	1	0	0	27	1	90	113	-2850	900	[77,96,103,127]	238.4	0.9772	0.7347	2102	1	1	9104	9037	15190	3558	1046950	1	1
Male	Obese	TRUE	A	8	1	0	0	27	2	806	339	-2425	765	[790,325,823,353]	270	0.9351	0.69	2728	3	1	10282	11039	16386	3667	1655390	3	2
Male	Obese	TRUE	A	8	1	0	0	27	3	16	444	-2893	702	[8,435,27,453]	104.1	0.9559	0.7115	3517	4	1	9039	9184	17973	3569	849660	4	3
Male	Obese	TRUE	A	8	1	0	0	27	4	903	998	-2367	373	[885,986,921,1010]	243.3	0.9133	0.5788	1075	6	1	4632	4434	9007	2214	477088	6	4
Male	Obese	TRUE	A	8	1	0	0	28	1	712	366	-2481	103	[697,352,726,380]	227.5	0.9775	0.7904	2338	5	1	6231	5802	11946	3935	984548	4	1
Male	Obese	TRUE	A	8	1	0	0	28	2	763	501	-2451	22	[751,489,776,516]	186.7	1.011	0.8127	2936	6	1	8800	9098	17394	3074	1311130	5	2
[truncated: 9,505 more rows]
