# Supplementary material for: Maternal diet-induced obesity during pregnancy alters lipid supply to mouse E18.5 fetuses and changes the cardiac tissue lipidome in a sex-dependent manner
Source: eLife. 2022 Jan 13;11:e69078. doi: 10.7554/eLife.69078 (PMC8794468; doi:10.7554/eLife.69078)
Supplement: Figure 2—source data 2. [file elife-69078-fig2-data2.csv]

Figure 2-Source Data 2
Figure 2B
Relative lipid classes abundance in fetal serum
	PC&PE	PG	PS	PA	PI	TG	SM	CE	Chol	Cer	TG/PL
F_Control	652.9860442	0.054029489	2.71883183	0.35529179	0.193801421	145.8175345	47.26257502	2.4225551	92.64700774	1.616334724	0.222178512
F_Control.1	623.8358314	0.055613268	0.410084862	0.167619727	1.943494011	171.2918584	37.40369503	1.82153306	104.9214081	1.990066623	0.273448916
F_Control.2	648.9100972	0.062537385	1.833142914	0.243071099	0.443883362	154.8904516	49.65685188	1.817061869	89.54991243	2.577057722	0.237747014
F_Control.3	682.823412	0.06649783	1.147406007	0.389905664	0.271715312	146.6585755	40.26095058	2.169608213	81.42691326	1.188494704	0.21419425
F_Control.4	601.5725267	0.053829604	2.354194656	0.224110016	0.48205148	156.2547504	45.39310552	3.031377309	103.9612289	1.40410301	0.258406125
F_Control.5	640.9593007	0.130598963	2.289307175	0.120497587	0.250612964	145.0091581	40.81568475	2.682985701	105.3309044	2.404249685	0.225256833
F_Control.6	612.9627758	0.113091682	1.835489458	0.060117907	0.132016369	147.7068568	49.34896454	1.300540682	85.443312	1.046352306	0.240133342
F_Control.7	604.4861846	0.041199453	3.279309134	0.175525981	0.352427265	148.9814972	50.92169516	2.499022634	113.1805539	1.810684092	0.244900563
F_Obese	577.4016469	0.05209492	3.626141617	0.439838553	0.270414657	161.3562874	47.60773375	3.417074665	121.4591803	0.786284421	0.277344488
F_Obese.1	602.5624462	0.193911048	0.497307622	0.502603363	0.309173741	163.5890774	44.45456304	2.040839627	105.5189323	1.274254343	0.270813501
F_Obese.2	624.5241425	0.074744284	1.570548427	0.190488097	0.153026236	191.3795204	50.08262085	2.436973354	113.3485967	1.988345624	0.305467781
F_Obese.3	622.9717396	0.100729974	0.764460617	0.3431933	0.413318545	151.6182471	40.81367428	1.502569408	86.19417103	1.034305359	0.242747101
F_Obese.4	618.9002727	0.163605796	3.279226945	0.329639405	0.312272967	140.3712909	45.8751007	2.697861342	99.99407721	1.012128997	0.225320492
F_Obese.5	618.9971819	0.037408775	2.528913785	0.643927848	1.592340148	147.7057617	46.26475494	0.859439393	80.70220453	1.101274244	0.23678393
F_Obese.6	608.7306332	0.110863718	1.889980915	0.332235983	0.604664106	153.4064546	44.38706101	1.383524029	92.58447093	0.936403638	0.250800042
M_Control	621.2894731	0.057718755	4.99590581	0.213686259	0.29873566	154.7009077	49.84243693	2.770790287	102.6973912	1.311091365	0.246788778
M_Control.1	665.6055083	0.103108466	7.850940098	0.841986201	0.327048283	143.8520625	45.44915446	2.18706364	96.39738857	1.664945571	0.213199892
M_Control.2	664.6023287	0.092771018	7.638532956	0.184920321	0.36041294	150.3808346	41.56453773	1.564155149	87.90334189	1.690988225	0.223488684
M_Control.3	670.7676371	0.1267117	0.983734087	0.34778632	0.267648497	141.6353325	46.46665484	2.227595855	90.83698033	1.392907745	0.21061219
M_Control.4	606.855996	0.065561564	1.591449857	0.307748551	0.280371994	149.8058016	47.859423	3.592699516	109.6987984	1.264518354	0.245945697
M_Control.5	634.9428174	0.092873741	1.827613497	0.101775118	0.487867273	136.9711561	45.34430702	3.207517318	107.4617923	1.834441436	0.214872575
M_Control.6	608.0860021	0.076116609	0.761382283	0.271048341	0.290732199	154.4858093	37.46214655	3.325587058	109.8608624	2.146453013	0.253469303
M_Control.7	589.6846779	0.057113379	4.671925167	0.095339318	0.253206745	148.9535848	54.64855283	3.652232019	114.0941241	1.00047026	0.250442226
M_Control.8	637.2901798	0.069464349	4.209848238	0.404379506	0.317278522	139.5845595	50.8179462	1.802368922	96.04144916	0.89262358	0.217322875
M_Control.9	623.2364313	0.120521368	3.014833598	0.559154645	0.380303297	143.6191714	43.91558322	3.127831479	119.8254851	1.886292439	0.228944041
M_Obese	623.7446219	0.09623014	2.68304409	0.332209624	0.348903233	162.3898256	40.03587941	1.444720359	94.26965297	0.875207752	0.258910282
M_Obese.1	604.3645537	0.063470515	1.24999242	0.188748137	0.243853868	149.8834481	49.29511026	2.821312801	97.020542	1.473029297	0.247287283
M_Obese.2	576.6476999	0.028889659	1.744603143	1.005907275	0.497646907	157.0439239	46.56526336	3.895400848	136.6764166	1.814263867	0.270800522
M_Obese.3	687.2605029	0.095211948	1.732641707	0.268426321	0.243150493	173.0753351	45.95434085	1.111820073	86.27148524	1.572778723	0.250979338
M_Obese.4	591.8713275	0.098783431	3.458219262	0.292820387	0.355001901	153.2171588	48.24099136	3.377059618	125.7702203	1.197534837	0.257042927
M_Obese.5	538.6637654	0.01717643	3.810647346	0.216444387	0.275590258	188.1387532	45.91095216	4.418004478	159.45348	1.01925514	0.346490658
M_Obese.6	606.7299897	0.135276694	2.009829055	0.105724682	1.325900266	149.7907896	45.99650951	1.976105731	102.0184651	1.500256961	0.245435262
M_Obese.7	613.9106835	0.110933679	3.758718105	0.355011824	1.00907975	149.41655	47.21656188	1.974970119	92.3556445	1.098344228	0.241327457
