# Supplementary material for: Maternal diet-induced obesity during pregnancy alters lipid supply to mouse E18.5 fetuses and changes the cardiac tissue lipidome in a sex-dependent manner
Source: eLife. 2022 Jan 13;11:e69078. doi: 10.7554/eLife.69078 (PMC8794468; doi:10.7554/eLife.69078)
Supplement: Figure 3—source data 1. [file elife-69078-fig3-data1.csv]

Figure 3-Source Data 1
Figure 3A
Relative fatty acid classes abundance in maternal and fetal serum
	Saturated	Monounsaturated	Polyunsaturated
Dam_Control	364.3412893	287.8117866	290.575866
Dam_Control.1	349.8412546	286.7274487	304.2540936
Dam_Control.2	356.4075887	269.3518598	307.5546342
Dam_Control.3	322.9510638	342.8249482	317.1560094
Dam_Control.4	499.5865695	281.1148102	196.9181961
Dam_Control.5	412.2590346	256.1012726	253.570354
Dam_Control.6	363.6927192	307.4450151	290.4472221
Dam_Control.7	409.7399915	293.2151198	245.7720335
Dam_Obese	508.0789848	282.1418487	192.9926618
Dam_Obese.1	296.9796857	340.5467339	321.4162142
Dam_Obese.2	447.2602331	388.9705805	182.6490187
Dam_Obese.3	274.4898733	392.8479104	313.9993283
Dam_Obese.4	339.3707853	330.9712708	262.8833099
Dam_Obese.5	372.0045531	299.4695027	259.3293329
F_Control	350.283471	472.3659184	209.4513148
F_Control.1	323.1767076	476.2572354	227.3999443
F_Control.2	338.9316528	531.1897775	200.9457246
F_Control.3	363.4380814	462.0195732	199.9373208
F_Control.4	413.928737	350.7301457	206.2796973
F_Control.5	372.4239506	453.1727523	198.6653445
F_Control.6	296.7558714	417.5336058	266.9706838
F_Control.7	388.896164	366.1258575	211.8811807
F_Obese	397.7176659	344.7947036	214.3341965
F_Obese.1	372.2583224	455.8261938	188.7549039
F_Obese.2	449.4806503	376.9917105	158.045458
F_Obese.3	299.58732	574.7296757	229.3258194
F_Obese.4	390.0121984	361.9600834	213.6434164
F_Obese.5	319.5792637	397.5174343	247.9550235
M_Control	419.5786861	356.8626577	200.8555394
M_Control.1	386.1873031	438.589621	193.3327267
M_Control.2	363.6768504	421.5135778	210.004761
M_Control.3	364.7361549	443.9882387	204.3266729
M_Control.4	481.0738407	350.4777453	186.9940742
M_Control.5	373.9240028	449.8801348	198.3100759
M_Control.6	351.0695233	519.5433016	193.4352789
M_Control.7	401.1306334	325.260833	224.0278591
M_Control.8	337.1449078	447.8663053	229.5505105
M_Control.9	415.6351266	387.061006	153.8933356
M_Obese	363.9108104	383.5232304	225.0773461
M_Obese.1	346.3895282	437.4995469	216.6999832
M_Obese.2	418.0218956	369.7024987	191.7865962
M_Obese.3	379.3099596	411.0496345	214.9754907
M_Obese.4	402.8601065	382.6742375	196.7667999
M_Obese.5	439.8160222	361.7067823	185.3276963
M_Obese.6	362.6363396	402.9092491	216.0648677
M_Obese.7	396.9886383	372.8532427	196.6387447
