# Supplementary material for: Maternal diet-induced obesity during pregnancy alters lipid supply to mouse E18.5 fetuses and changes the cardiac tissue lipidome in a sex-dependent manner
Source: eLife. 2022 Jan 13;11:e69078. doi: 10.7554/eLife.69078 (PMC8794468; doi:10.7554/eLife.69078)
Supplement: Figure 4—source data 3. [file elife-69078-fig4-data3.csv]

Figure 4-Source Data 3
Figure 4I
Relative fatty acids classes abundance in fetal heart
	Saturated	Monounsaturated	Polyunsaturated
F_Control	458.7269056	209.4335688	331.8395257
F_Control.1	413.9865489	215.8148165	370.1986345
F_Control.2	451.4713356	215.6961813	332.832483
F_Control.3	421.0454823	220.2367	358.7178177
F_Control.4	539.8788288	186.1529989	273.9681723
F_Control.5	485.921281	204.0967457	309.9819734
F_Control.6	428.3500055	216.2600901	355.3899044
F_Obese	433.0791398	240.8150899	326.7456207
F_Obese.1	424.0429144	200.6906643	375.2664214
F_Obese.2	438.9135066	201.8700701	359.2164233
F_Obese.3	400.7559172	214.1464076	385.0976751
F_Obese.4	599.8514716	185.0315229	215.1170055
F_Obese.5	432.5386214	263.8796798	303.5816988
F_Obese.6	470.2487389	190.2675923	339.4836688
F_Obese.7	410.63917	206.6416484	382.7191816
M_Control	468.5569587	220.4564357	310.9866058
M_Control.1	431.2612488	255.3225531	313.4161981
M_Control.2	408.3450265	211.9250419	379.7945725
M_Control.3	471.081239	214.0124003	316.2647981
M_Control.4	441.388248	223.9698521	334.7018547
M_Control.5	455.8017777	226.1444746	318.0537476
M_Control.6	404.7438042	219.9346957	375.3215002
M_Control.7	394.7072908	227.9284248	377.6970286
M_Obese	410.9623246	228.0685444	360.969131
M_Obese.1	348.0329651	232.8569011	419.502806
M_Obese.2	412.2973632	217.5511842	370.1514527
M_Obese.3	524.525781	201.6885688	273.78565
M_Obese.4	554.8770418	199.6325501	245.5361425
