# Supplementary material for: Maternal diet-induced obesity during pregnancy alters lipid supply to mouse E18.5 fetuses and changes the cardiac tissue lipidome in a sex-dependent manner
Source: eLife. 2022 Jan 13;11:e69078. doi: 10.7554/eLife.69078 (PMC8794468; doi:10.7554/eLife.69078)
Supplement: Figure 4—source data 4. — Scaled raw data and statistical significance. [file elife-69078-fig4-data4.csv]

Figure 4-Source Data 4
Figure 4J
Fatty acids abundance obtained by direct infusion high-resolution mass spectrometry of the heart (negative mode). Scaled raw data and statistical significance.
	group	sex	FailedQC*	FA(14:0)_[M-H]1-	FA(14:1)_[M-H]1-	FA(15:0)_[M-H]1-	FA(15:1)_[M-H]1-	FA(16:0)_[M-H]1-	FA(16:0)-OH_[M-H]1-	FA(16:1)_[M-H]1-	FA(16:2)_[M-H]1-	FA(16:3)_[M-H]1-	FA(17:0)_[M-H]1-	FA(17:1)_[M-H]1-	FA(18:0)_[M-H]1-	FA(18:1)_[M-H]1-	FA(18:2)_[M-H]1-	FA(18:4)_[M-H]1-	FA(19:0)_[M-H]1-	FA(19:1)_[M-H]1-	FA(20:0)_[M-H]1-	FA(20:1)_[M-H]1-	FA(20:2)_[M-H]1-	FA(20:3)_[M-H]1-	FA(20:4)_[M-H]1-	FA(21:0)_[M-H]1-	FA(22:0)_[M-H]1-	FA(22:1)_[M-H]1-	FA(22:3)_[M-H]1-	FA(22:4)_[M-H]1-	FA(22:5)_[M-H]1-	FA(22:6)_[M-H]1-	FA(23:0)_[M-H]1-	FA(24:0)_[M-H]1-	FA(24:4)	FA(24:5)	FA(25:0)	FA(26:0)	FA(28:0)
m/z				227.2017	225.186	241.2173	239.2017	255.233	271.2279	253.2173	251.2017	249.186	269.2486	267.233	283.2643	281.2486	279.233	275.2017	297.2799	295.2643	311.2956	309.2799	307.2643	305.2486	303.233	325.3112	339.3269	337.3112	333.2799	331.2643	329.2486	327.233	353.3425	367.3582	359.295	357.279	381.373	395.389	423.42
CON6 L4	Control	M	F	16.38344413	0.932178598	8.056353924	0.751243565	256.191593	0.342485506	16.66680262	0.645295095	0.461270495	2.932487922	1.043645745	179.9818237	199.2833066	41.17558682	0.116984106	0.588129541	0.3820432	1.875833327	1.137969979	2.126103879	6.141619614	184.687562	0.272253934	0.683693091	0.259245368	0.569863843	16.12984953	20.21200974	38.23346828	0.101010673	0.629552534	0.23406212	0.25293027	0.134981434	0.27343935	0.10987664
CON9 L1	Control	M	F	15.90366167	0.526944569	7.952149797	0.216707629	233.6711282	0.141016274	14.08144316	0.497856798	0.353899067	2.870857576	0.393533218	166.2347246	238.3111159	40.53840363	0.012999974	0.790369874	0.442688428	1.761392199	1.052854346	2.201818301	6.257925548	188.119991	0.314786636	0.608288586	0.297265804	0.667629711	19.74514145	17.55248846	36.71426233	0.136419276	0.52989994	0.223264424	0.530517368	0.064266953	0.156234184	0.126053076
CON17	Control	M	F	16.15302562	1.059631361	7.703680324	0.22285373	227.1260337	0.428342408	17.73159888	0.705280372	0.498942129	2.916470179	0.857370159	148.4838138	189.8260001	54.84340297		0.601789262	0.4561951	1.719676161	1.369429762	3.188655537	7.30238051	214.2136087	0.250813242	0.738794114	0.401962813	0.479982489	20.6318388	26.86548725	50.25819752	0.292282593	0.989385466	0.280682606	0.461472687	0.430775216	0.437811233	0.072333153
18C18 a	Control	M	F	24.68269905	0.530531251	14.49349398	0.236072016	258.5820201	0.068076189	17.26782252	0.526047659	0.253235322	4.758124139	0.341063108	163.021939	193.8464471	53.68270856	0.028155038	0.750347763	0.479719674	2.472014187	1.191171733	2.127863081	10.64924361	179.8781054	0.326368433	0.449088225	0.119572873	1.040660446	14.619908	22.01427483	31.00505794	0.068315707	0.344847342					0.14500588
19C1 L2	Control	M	F	20.4914666	0.553408623	10.81996991	0.219703684	239.2219562	0.320225057	18.16350075	0.561344432	0.269459645	3.776492252	0.405843758	158.3898086	203.0885139	47.82021086		1.070215585	0.3899675	2.237197366	1.025092428	2.502463966	8.395508353	192.646695	0.616315377	1.15314274	0.12382144	0.462895969	18.5381129	21.05169979	41.75914596	0.265196983	1.749267414	0.29187692	0.342486197	0.641913113	0.521146691	0.113934101
RC37 a	Control	M	F	21.38810661	1.764136367	12.93437085	1.590417184	250.2193897	0.191975444	25.66698794	0.56202942	0.4252474	3.936167528	2.362691574	160.2029663	192.7427622	41.54911782	0.116406121	0.792730754	0.535442621	3.210549736	1.153679327	2.166077205	6.605263725	185.9640416	0.258582555	0.808858914	0.328357399	0.404864469	18.64874074	20.84061545	40.30591521	0.156122127	0.955606296	0.149355901	0.316072581	0.147089391	0.520374018	0.078887515
RC36 a	Control	M	F	14.82353937	0.621545716	6.047656758	0.215899292	231.4188901	0.19571178	18.63877595	0.583407529	0.42174982	1.979752459	0.442016018	147.1604135	198.4112218	47.0645291	0.013332525	0.449873058	0.248826277	1.535479317	1.124411292	2.417314374	7.522773931	224.2175849	0.145760356	0.310909668	0.231999364	0.770232817	20.02772612	23.11291395	48.2782725	0.027126747	0.434209849	0.301375496	0.590287124	0.095374009	0.038727924	0.080379259
19C4 R3	Control	M	F	17.26501736	0.780432288	9.699663806	0.347748638	226.2156746	0.178507277	16.79781726	0.680573014	0.392844738	3.010485715	0.390887226	134.0444278	208.3448019	41.80235503	0.058438632	0.822798132	0.193234885	1.617152944	1.041670103	2.8026871	7.210642417	223.5555012	0.161756574	0.597715196	0.031832531	0.205809336	22.24079106	26.04411762	52.37098844		0.499576937	0.08673316	0.245546823	0.230390728	0.031379519
19C1 R1	Control	F	T
CON7	Control	F	F	16.8745092	0.869621945	7.548850814	0.479907621	250.721617	0.265970605	15.84759503	0.73294127	0.561384541	2.474016915	0.55463428	176.3196863	189.8296009	46.87816787	0.062672925	0.747928128	0.348565073	1.977474777	1.27928887	2.472497279	6.856790717	195.9477676	0.235571647	0.621886617	0.224355061	0.530053354	17.48072254	21.06786104	38.50759127	0.089485127	0.532536164	0.292525879	0.448549403	0.129419061	0.120858034	0.067095172
CON8	Control	F	F	14.72584573	0.618724542	6.110607955	0.456280135	231.4694131	0.254945591	17.36102707	0.636414138	0.495228251	2.089553592	0.661897049	155.2155678	195.0356748	55.46400071	0.08744819	0.647805617	0.326136052	1.491962512	1.072049583	2.676298231	8.173687884	212.2165576	0.174571149	0.601707299	0.283027253	0.675339687	18.50166007	24.96344451	45.35786697	0.077323747	0.733933026	0.45402644	0.496661819	0.156749971	0.17727013	0.059291728
CON12 a	Control	F	F	18.96946007	1.132703544	11.02485368	0.987896665	249.9038814	0.282760239	24.18182468	0.740308375	0.420788273	3.510867289	1.672372094	162.085662	185.0064527	49.33712801	0.059038665	0.686053114	0.557985317	2.612746148	1.380469619	2.513938928	7.034316488	195.4476885	0.274322781	0.661115696	0.776476718	0.450339148	18.38818603	17.44576808	40.33670903	0.129558104	0.834912598	0.229989602	0.428283898	0.244407411	0.199617456	0.051117625
CON13	Control	F	F	13.5506065	0.649211032	5.396140572	0.340671559	234.5247082	0.181466279	15.70782832	0.56678589	0.680013969	2.087946681	0.593000768	161.2326452	201.2989597	49.80395218	0.081300235	0.56200267	0.386728896	1.611476025	1.025469214	2.771188485	7.100989151	206.0917236	0.196218042	0.558636281	0.234830512	0.489238059	18.41621785	19.64358182	52.39238804	0.111021555	0.61425904	0.308421527	0.372016892	0.133837008	0.182806689	0.101711567
CON15 a	Control	F	F	18.83179527	0.888753145	11.21043165	0.621557172	287.5779417	0.35577605	15.91721846	0.597006914	0.321498918	4.895357709	0.654308437	209.9328754	166.3066711	37.26687641	0.034188026	0.889235078	0.409015751	2.758731103	1.1085075	2.078829793	6.394381274	160.2049079	0.266279218	0.886854421	0.246967346	0.12028205	14.7880139	18.20281115	33.74929322	0.094640748	1.450931364	0.076520716	0.133561979	0.25521255	0.452441971	0.020324556
CON16	Control	F	F	22.1985249	1.022083171	11.26490666	0.437491904	268.4102435	0.228839294	16.56289162	0.559460835	0.499390512	3.285618393	0.65274834	173.0687525	183.900903	43.19859267	0.118424573	0.907135509	0.324431183	3.422854894	1.011038671	2.02769286	7.003217307	183.3739804	0.41044446	0.777596295	0.185157858	0.469120857	16.59313229	19.72286236	35.9824166	0.170385146	1.083717	0.291071836	0.142610259	0.289311246	0.37121889	0.031732315
RC36 b	Control	F	F	13.23145723	0.772735422	5.390256947	0.390756976	235.703018	0.130574518	19.1909719	0.768244127	0.562480177	1.983467292	0.509811274	168.1485773	193.3790379	45.78710677	0.093300277	0.526334281	0.411685098	1.607748416	1.340992254	2.590966909	7.670738972	208.2254883	0.167800552	0.530073951	0.264099298	0.75567295	19.4639868	22.95710526	45.56274517	0.087154747	0.519247436	0.426714432	0.525354213	0.132223182	0.134088456	0.057983233
F7 L4	Obese	M	T
F66 R1	Obese	M	F	16.38809022	0.697630857	7.517231217	0.302097835	227.2698928	0.19362714	14.53788624	0.43271539	0.43202589	2.573698648	0.638222319	153.3145133	210.4093158	47.06909277	0.018797698	0.607431016	0.392468771	1.502063054	0.937983946	2.771765479	5.689038126	214.4558563	0.154942115	0.650028285	0.152938584	0.27611996	20.23081644	13.74005327	55.12174114	0.106342866	0.456299568	0.309488992	0.421619557	0.083738236	0.047068101	0.097358058
18F49 a	Obese	M	F	19.24419495	0.226596901	10.47394186	0.039139125	198.2470066	0.178323725	17.92377931	0.362423289	0.235699161	3.109448276	0.148972635	114.3698408	213.6595295	51.1995031		0.688495127	0.098074199	0.564197764	0.708198147	3.185002226	8.112222183	240.8388737	0.204515919	0.340634819	0.052611236	0.417846133	22.64684628	20.25231091	71.8478378	0.037688636	0.120274939	0.179486098	0.169081689		0.075089404	0.042313458
F47	Obese	M	F	15.52728412	0.513572717	5.861954696	0.172851522	231.169277	0.151742808	16.74787669	0.607621162	0.463557284	2.40478975	0.641988112	153.614742	197.3383163	48.65703483	0.073082047	0.461009038	0.487010781	1.680033413	1.347153183	2.500471611	6.765679391	212.8790298	0.180375476	0.455609553	0.302414932	0.5215693	19.72824389	20.66811741	56.46831904	0.094149881	0.502123222	0.368705421	0.450021486	0.063929409	0.087244357	0.043098428
19F5 R1	Obese	M	F	16.44896738	0.824828486	6.617698261	0.293411206	274.105881	0.350452509	16.79034162	0.536854925	0.29564645	3.895517074	0.89093424	217.7876323	180.9287673	53.24467583	0.079890308	0.637050542	0.531400105	2.351137685	1.240534348	2.313710333	8.77640493	149.5171655	0.232452056	0.624308743	0.188351512	0.690007083	14.01132795	13.09122678	30.66758571	0.097572507	0.890253869	0.195758306	0.365395944	0.249445991	0.19850815	0.038902961
19F2 L1	Obese	M	F	37.95138827	2.778471892	24.4946292	2.815884657	304.0968871	0.188933681	33.73460568	0.745128134	0.261817494	6.609806619	4.036831989	168.970474	152.7062642	37.55372984		2.030041271	0.720478902	6.869248554	1.523323565	2.320906923	4.705274752	135.9280274	0.847349876	0.718264845	1.3166892	0.103185155	12.43155312	11.24438996	39.85973541	0.148024265	1.257547061	0.262898794	0.073761105	0.236906336	0.432169947	0.025370749
19F6 R2	Obese	M	T
19F4 R2	Obese	M	T
F15 a	Obese	F	F	27.91869642	0.703560171	17.90135193	0.2350907	235.8032662	0.110540457	14.44163383	0.319398418	0.141212093	5.686973323	0.302884223	140.9322181	224.2697013	45.06500166		1.102031303	0.159722973	1.878076176	0.654412322	2.69875474	7.819379661	183.9212616	0.543290499	0.25516469	0.048084404	0.111020787	17.13316685	16.13297476	53.25353195	0.111237334	0.185217011	0.041872625	0.060783762		0.058487678
F10 a	Obese	F	F	16.40034734	0.624037446	5.93696112	0.282373913	239.1119109	0.117779492	12.9987969	0.591317289	0.747868981	2.253493735	0.529861189	156.7270999	184.6790409	45.84103938	0.018658079	0.650453286	0.431256087	1.443034175	0.923048613	3.079458666	5.287968657	214.5601621	0.196748893	0.388870575	0.222249266	0.258047931	18.90748628	17.18278709	67.93993702	0.070290013	0.499806686	0.472372334	0.379317573	0.113734024	0.068654996	0.063729247
F7	Obese	F	F	17.14177402	0.708232603	8.053084163	0.376471654	236.8982194	0.409391883	14.24191322	0.502644019	0.543220057	2.980168381	1.003098007	155.1086442	183.1533072	45.09273747	0.048214454	0.794533621	0.735752372	2.142788608	1.345225862	2.685978007	4.903082976	200.4832713	0.373047865	1.354009458	0.306069178	0.423453431	16.67113064	13.52684697	73.74312473	0.721865243	5.372625263	0.345897427	0.246821814	1.841965705	4.073683846	1.647704993
F20 a	Obese	F	F	12.38136003	0.729295417	4.812868309	0.270280547	222.4001675	0.135154568	14.65162261	0.566595931	0.655816992	1.863113186	0.686556954	155.5191148	195.7702615	51.7689359	0.200682936	0.426269253	0.451643814	1.820775131	1.366358619	3.123363498	6.710573132	218.8223255	0.276690513	0.365682137	0.22038818	0.345754871	17.69704572	17.59336769	66.81208636	0.084073289	0.455267811	0.406634992	0.394491543	0.12726795	0.05694173	0.031171026
F9 a	Obese	F	F	37.41837892	2.639155018	26.01462065	2.77192261	317.0775413	1.366328609	30.42494489	1.014908698	0.294069527	8.130168608	4.098391415	186.9178833	141.058409	41.02616744	0.039745016	2.061335304	1.069223266	7.630726693	1.659023068	2.440309444	4.610741693	115.4192796	0.94318539	2.353421136	1.310453679	0.104939238	9.759871403	8.905554327	31.29874884	1.394278142	4.286009789	0.084246695	0.118423564	2.031641115	1.936037237	0.289915362
F14 a	Obese	F	F	16.47112589	0.882195266	7.099539388	0.516707991	235.3323147	0.273717772	15.51595731	0.604454263	0.399052401	2.686250557	0.75649848	166.1775776	243.7997185	48.33038232	0.054430623	0.62249969	0.664195309	1.720144122	1.415539416	2.232404562	7.294106393	174.4143239	0.20402415	0.653557141	0.328867526	0.446535531	14.22444341	13.68949382	41.61489634	0.127616446	0.665645384	0.147986145	0.129189097	0.21495533	0.114403918	0.175249262
F17	Obese	F	F	18.12791178	0.746953837	8.577313191	0.443690301	255.5712041	0.390097014	11.72701813	0.443870678	0.779380793	2.952788697	0.618947131	177.5989445	175.2498435	39.12279627	0.05304304	0.782387033	0.33944783	3.104962033	0.850057922	2.824918701	4.418203499	197.0946627	0.309686956	0.650715325	0.291633698	0.175665942	16.50959299	13.44874994	63.87123588	0.269645397	1.058154237	0.406382601	0.335165737	0.335517153	0.462289551	0.057121896
F66	Obese	F	F	15.79361926	0.504425929	6.538535134	0.273957834	226.6721679	0.084382893	13.30252904	0.439055476	0.523882771	2.631536068	0.608449421	153.578414	189.9795275	43.82547984	0.011612332	0.5156302	0.487483638	1.628178418	1.1383773	2.983837923	5.687220538	229.9284122	0.226508945	0.635756115	0.346897768	0.422042686	22.61797546	15.15159353	60.27875011	0.155782578	0.943779453	0.428677103	0.420641639	0.405357094	0.692522644	0.136999347
Male_Pvalue				0.566792655	0.738384195	0.713782191	0.745823688	0.61074588	0.810204315	0.633583484	0.654832196	0.836619944	0.346557484	0.191727971	0.645385981	0.391876036	0.207661427	0.005558638	0.748401044	0.670805276	0.642583091	0.537388477	0.373328103	0.637927401	0.928134868	0.489364471	0.452830348	0.425411374	0.6726402	0.819848995	0.427858618	0.464787092	0.709504722	0.228699397	0.653448522	0.02574409	0.317033949	0.354308445	0.410017614
Female_Pvalue				0.325844338	0.429315018	0.464558553	0.707491505	0.405933644	0.237080368	0.431645184	0.571409592	0.181566428	0.521669684	0.162114225	0.264758145	0.116310629	0.207425888	0.210151583	0.72872894	0.724404034	0.444802567	0.510032973	0.715773728	0.188488145	0.970950926	0.673706069	0.255773425	0.958862802	0.496498412	0.473056119	0.065295177	0.024300516	0.856235487	0.041087793	0.513172228	0.000785279	0.020143317	0.946495478	0.215962431
* Outlier samples were identified through a combination of frequency distribution analysis, lipid classes frequency investigation, PCA and hierarchical clustering analysis. Samples with lower than 66.7% of lipid signals detected or deemed as outliers in all the aforementioned analyses failed the QC for mass spectrometry and were excluded from the datasets and from further statistical tests
