# Supplementary material for: Maternal diet-induced obesity during pregnancy alters lipid supply to mouse E18.5 fetuses and changes the cardiac tissue lipidome in a sex-dependent manner
Source: eLife. 2022 Jan 13;11:e69078. doi: 10.7554/eLife.69078 (PMC8794468; doi:10.7554/eLife.69078)
Supplement: Figure 5—source data 1. [file elife-69078-fig5-data1.csv]

Figure 5-Source Data 1
Figure 5A
Quasi-likelihood general linear models generated from the analysis of E18.5 fetal cardiac transcriptomes (obese versus control).
	gene_short_name	tss_id	locus	logFC	logCPM	LR	PValue	FDR
ENSMUSG00000037071	Scd1	TSS40057	19:44394450-44407709	-1.040121931	3.562728076	48.93837451	2.64E-12	3.48E-08
ENSMUSG00000040740	Slc25a34	TSS75914	4:141618823-141623821	1.037758641	2.335809157	34.7185666	3.81E-09	2.51E-05
ENSMUSG00000042045	Sln	TSS16804	9:53850250-53853844	2.669126764	3.448493653	30.16578605	3.97E-08	0.000174431
ENSMUSG00000024042	Sik1	TSS69724	17:31844247-31855792	0.479577216	5.150355364	29.35890171	6.01E-08	0.000198356
ENSMUSG00000030772	Dkk3	TSS48895	7:112116018-112159057	0.601076331	5.662535338	28.60719819	8.87E-08	0.000233917
ENSMUSG00000073125	Xlr3b	TSS44828,TSS76723,TSS77269	X:73107634-73292976	-1.374305975	1.430226098	27.08245445	1.95E-07	0.000428683
ENSMUSG00000045294	Insig1	TSS48731	5:28071362-28078662	-0.544071077	5.773434262	23.2231093	1.44E-06	0.002718765
ENSMUSG00000025203	Scd2	TSS74994	19:44293675-44306864	-0.457147963	9.587873466	21.49123107	3.55E-06	0.005307884
ENSMUSG00000019997	Ctgf	TSS18809,TSS24580,TSS79183	10:24549440-24598683	-0.743103158	7.126745676	21.45572563	3.62E-06	0.005307884
ENSMUSG00000004891	Nes	TSS17588,TSS45370,TSS70785	3:87971077-87980451	0.271595669	7.307374638	21.05530314	4.46E-06	0.00588693
ENSMUSG00000090234	Gm16042	TSS69499	6:8259287-8597548	1.638961786	1.798470584	20.69286685	5.39E-06	0.006466547
ENSMUSG00000036832	Lpar3	TSS2758	3:146220960-146286214	-0.381802338	4.86102857	20.29383418	6.64E-06	0.007301695
ENSMUSG00000031762	Mt2	TSS58641	8:94172617-94173567	0.679760207	3.27261742	19.8556382	8.35E-06	0.008475593
ENSMUSG00000052684	Jun	TSS17684,TSS77402	4:95049033-95167318	-0.378286349	5.483528697	18.8813538	1.39E-05	0.013108729
ENSMUSG00000028195	Cyr61	TSS48064	3:145646970-145649985	-0.573905537	5.043409938	18.67376109	1.55E-05	0.013158813
ENSMUSG00000022797	Tfrc	TSS28664,TSS3212,TSS51319,TSS62220,TSS64996,TSS71941	16:32608919-32632794	0.751710397	8.480957016	18.61943411	1.60E-05	0.013158813
ENSMUSG00000051839	Gypa	TSS2748	8:80494044-80510785	1.378966583	1.843606708	17.83450141	2.41E-05	0.018700999
ENSMUSG00000064356	mt-Atp8	TSS58462	MT:7765-9390	-0.340990265	9.402491041	17.54278554	2.81E-05	0.02058948
ENSMUSG00000072949	Acot1	TSS22819	12:84009501-84017670	0.569041243	3.233392231	16.91277867	3.91E-05	0.026751784
ENSMUSG00000028607	Cpt2	TSS24340,TSS53553,TSS62059,TSS72017,TSS79987,TSS81640	4:107903980-107923610	0.282791961	6.030012148	16.84525885	4.06E-05	0.026751784
ENSMUSG00000001467	Cyp51	TSS3172,TSS50288,TSS72443	5:4081144-4104746	-0.358894494	5.66392703	16.53642291	4.77E-05	0.029484819
ENSMUSG00000058258	Idi1	TSS33936,TSS80744,TSS82127,TSS84560,TSS85065	13:8885500-8892451	-0.507706289	5.758564128	16.47994389	4.92E-05	0.029484819
ENSMUSG00000019890	Nts	TSS44649	10:102481759-102490418	0.630905651	3.932477112	16.23208172	5.60E-05	0.030644466
ENSMUSG00000030747	Dgat2	TSS23354	7:99153662-99182713	0.435512199	5.391731732	16.22455557	5.63E-05	0.030644466
ENSMUSG00000024665	Fads2	TSS50587	19:10064163-10101503	-0.587564087	3.867420714	16.16458963	5.81E-05	0.030644466
ENSMUSG00000016349	Eef1a2	TSS11343	2:181147652-181157014	-0.262270137	7.849872658	15.82210179	6.96E-05	0.034002354
ENSMUSG00000021477	Ctsl	TSS85481	13:64363213-64370306	0.263127321	7.449680934	15.80348011	7.03E-05	0.034002354
ENSMUSG00000096768	ERDR1	TSS1366,TSS65174,TSS80189,TSS83181	Y:90784737-90816464	-0.833244454	2.821301671	15.7532338	7.22E-05	0.034002354
ENSMUSG00000059743	Fdps	TSS82106	3:89093591-89101967	-0.434221172	4.914684905	15.47520614	8.36E-05	0.038029788
ENSMUSG00000063011	Msln	TSS33837	17:25748613-25754327	0.464669797	5.405022059	15.38465914	8.77E-05	0.03856639
ENSMUSG00000024900	Cpt1a	TSS19084	19:3323300-3385732	0.290526136	6.863543335	15.22007051	9.57E-05	0.040720023
ENSMUSG00000085779	2310050B05Rik	TSS48333,TSS51948,TSS55076	10:81194608-81230833	0.42642513	6.031984424	14.93400997	0.000111338	0.045902429
ENSMUSG00000036902	Neto2	TSS65192	8:85636587-85690973	-0.441842629	4.156443053	14.85758355	0.000115941	0.046351797
ENSMUSG00000023830	Igf2r	TSS10765,TSS11376,TSS29818,TSS42287	17:12682405-12868143	0.268981968	11.66885704	14.58289416	0.000134127	0.050074704
ENSMUSG00000021662	Rgnef	TSS31403	13:97898594-98206165	0.384184099	4.906270149	14.57941222	0.000134375	0.050074704
ENSMUSG00000054932	Afp	TSS66964	5:90490713-90508907	-2.78085989	2.058107994	14.54791421	0.00013664	0.050074704
ENSMUSG00000029368	Alb	TSS64284	5:90460888-90476603	-2.655414702	3.752498534	14.23963009	0.000160945	0.05697084
ENSMUSG00000034958	Atcay	TSS48849,TSS62378,TSS77992	10:81194608-81230833	0.513170423	3.246555947	14.20316835	0.000164094	0.05697084
ENSMUSG00000022122	Ednrb	TSS22545,TSS60012	14:103814624-103844173	0.365448496	6.277797798	14.14335802	0.000169394	0.057302982
ENSMUSG00000021108	Prkch	TSS36513,TSS42146	12:73584796-73778185	0.280970761	5.219997141	13.95830458	0.00018691	0.060321305
ENSMUSG00000034926	Dhcr24	TSS38246	4:106561037-106589113	-0.515007472	5.173974345	13.95277191	0.000187461	0.060321305
ENSMUSG00000021226	Acot2	TSS42695	12:83987860-83993873	0.351073048	5.282516193	13.68133765	0.000216596	0.068037013
ENSMUSG00000002908	Kcnn1	TSS80668	8:70842048-70857008	0.465033119	3.707291174	13.47025283	0.000242376	0.07436423
ENSMUSG00000031274	Col4a5	TSS1587,TSS58268,TSS60705,TSS63119	X:141475384-141689234	0.219122486	8.183067632	13.00688053	0.000310349	0.091438789
ENSMUSG00000040711	Sh3pxd2b	TSS24870,TSS47187	11:32347819-32428173	0.248529974	5.720214923	12.96158934	0.000317947	0.091438789
ENSMUSG00000068745	Mybphl	TSS57622	3:108364910-108383741	2.395472882	2.598830939	12.95357847	0.000319311	0.091438789
ENSMUSG00000032602	Slc25a20	TSS21138	9:108662097-108684641	0.238193504	6.205584604	12.91620142	0.00032575	0.091438789
ENSMUSG00000002289	Angptl4	TSS20585,TSS22342,TSS23209,TSS42510	17:33773749-33781575	0.619990319	3.370963582	12.81595079	0.000343677	0.094245923
ENSMUSG00000041596	Vmn1r90	TSS26392,TSS34848,TSS78943	7:14530653-14622478	-0.714218253	2.434185496	12.76947708	0.000352321	0.094245923
ENSMUSG00000059213	Ddn	TSS65268	15:98803781-98831508	0.768496203	1.659489137	12.74385076	0.000357182	0.094245923
ENSMUSG00000025153	Fasn	TSS1339,TSS34775,TSS81067	11:120805939-120824178	-0.307577479	7.659913976	12.6313224	0.000379337	0.097908531
ENSMUSG00000039145	Camk1d	TSS10976,TSS30749,TSS72605,TSS85025	2:5293456-5714515	1.182743293	2.371569942	12.59923379	0.000385905	0.097908531
ENSMUSG00000034205	Loxl2	TSS37506,TSS8453	14:69609170-69695833	0.250989775	7.266381943	12.50257708	0.000406391	0.101160699
ENSMUSG00000034275	Igsf9b	TSS20302,TSS54933	9:27299227-27334763	-0.505540012	3.062724578	12.423399	0.000423988	0.103586515
ENSMUSG00000001403	Ube2c	TSS33444,TSS40591	2:164769897-164779967	-0.297136155	6.004184485	12.29720754	0.000453637	0.108815025
ENSMUSG00000022051	Bnip3l	TSS1062,TSS21488,TSS29801,TSS54239,TSS64958,TSS67926,TSS71836	14:66985238-67008877	0.271189665	6.311176169	12.23240295	0.000469667	0.110648446
ENSMUSG00000078566	Bnip3	TSS15570,TSS33646,TSS34774,TSS69874,TSS8256	7:138890835-138909519	0.33609137	7.687781483	11.96986349	0.000540679	0.12514348
ENSMUSG00000024208	2900010M23Rik	TSS3504,TSS55524,TSS68420,TSS7570	17:27122662-27133916	-0.291535344	5.705894112	11.92298657	0.000554455	0.126119439
ENSMUSG00000045725	Prr15	TSS8503	6:54039553-54503768	0.535761794	3.267884115	11.82127238	0.000585578	0.130941262
ENSMUSG00000024810	Il33	TSS19956,TSS19957,TSS2955,TSS42271,TSS52446	19:29925113-29960718	0.666271108	2.142074767	11.60147193	0.000658996	0.143974104
ENSMUSG00000030046	Bmp10	TSS18036	6:87429001-87434512	0.784681516	4.676784073	11.58268403	0.000665688	0.143974104
ENSMUSG00000020469	Myl7	TSS69311	11:5896636-5898782	1.25244818	7.842278719	11.42973916	0.000722778	0.151801922
ENSMUSG00000024063	Lbh	TSS45595,TSS70902	17:72918304-72941942	-0.211491815	9.300884525	11.42430955	0.000724894	0.151801922
ENSMUSG00000032459	Mrps22	TSS75162	9:98588732-98601679	-0.267384209	5.080114163	11.30114042	0.000774595	0.159675494
ENSMUSG00000030790	Adm	TSS69254	7:110627668-110629819	0.48875916	3.373590308	11.14476907	0.00084269	0.171040066
ENSMUSG00000031066	Usp11	TSS44689,TSS49192,TSS75920,TSS81979	X:20703905-20720539	0.257366769	5.482283086	10.78316829	0.001024272	0.20184901
ENSMUSG00000057378	Ryr3	TSS15577,TSS24714,TSS28172,TSS29371,TSS42405,TSS43548,TSS47199,TSS59740	2:112492963-113217096	1.315278276	4.161585945	10.78170845	0.00102508	0.20184901
ENSMUSG00000029185	Fam114a1	TSS18666,TSS45556	5:64970070-65041874	0.233547442	5.487101562	10.53712515	0.001170003	0.22699773
ENSMUSG00000020919	Stat5b	TSS10607,TSS51505,TSS75039	11:100780730-100850724	0.204468202	5.997755851	10.46611758	0.00121584	0.231500868
ENSMUSG00000093930	Hmgcs1	TSS65801	13:119690461-119708086	-0.283345291	7.731728393	10.42540297	0.001242937	0.231500868
ENSMUSG00000029484	Anxa3	TSS36740	5:96793384-96845968	0.261146795	5.146867884	10.42107321	0.001245855	0.231500868
ENSMUSG00000025137	Pcyt2	TSS14522,TSS31739,TSS31936,TSS34137,TSS41113,TSS41423,TSS50773,TSS50929,TSS5320,TSS58181,TSS63768,TSS9409	11:120610086-120617936	-0.280760852	5.981384564	10.29443397	0.001334321	0.244495749
ENSMUSG00000050195	Scd4	TSS9216	19:44333091-44346743	0.397152611	3.751936868	10.24086384	0.001373632	0.248251134
ENSMUSG00000038816	Ctnnal1	TSS11414,TSS12324,TSS21113,TSS22328,TSS29373,TSS67800,TSS71964,TSS83723,TSS8943	4:56810934-56865188	0.315238023	6.16721185	10.19270679	0.001409972	0.251375133
ENSMUSG00000083282	Ctsf	TSS77629	19:4855128-4860912	0.368827716	4.232076764	10.12330967	0.001464059	0.257537676
ENSMUSG00000086866	4930512H18Rik	TSS3911	8:61513245-61922834	-0.819909994	1.166208746	10.05499241	0.001519356	0.263748282
ENSMUSG00000031349	Nsdhl	TSS12965,TSS32422	X:72918556-72958514	-0.472233371	4.183933936	9.999068679	0.001566194	0.267025119
ENSMUSG00000029165	Agbl5	TSS1061,TSS12552,TSS13931,TSS16751,TSS17817,TSS30673,TSS34181,TSS36306,TSS49506,TSS68288,TSS73859,TSS77825,TSS85120	5:30888693-30907788	0.323783671	4.035887209	9.982086835	0.001580704	0.267025119
ENSMUSG00000033955	Tnks1bp1	TSS13462,TSS3991,TSS44018,TSS4408,TSS47878,TSS55194	2:85048021-85073048	0.236856362	6.308953351	9.960952824	0.001598953	0.267025119
ENSMUSG00000006585	Cdt1	TSS68991	8:119910359-124345724	-0.52696512	4.148582561	9.780721411	0.001763511	0.290825023
ENSMUSG00000041939	Mvk	TSS10337,TSS23350,TSS42384,TSS5550,TSS58362,TSS74312	5:114444268-114460591	-0.450433522	3.609101267	9.741648487	0.001801393	0.293404622
ENSMUSG00000010663	Fads1	TSS73456	19:10182887-10196870	-0.295307143	5.59013892	9.534865921	0.002016049	0.324362617
ENSMUSG00000028015	Ctso	TSS2846,TSS44410,TSS85930	3:81932600-81956725	0.314020242	4.339534828	9.508515582	0.002045205	0.3250891
ENSMUSG00000041064	Pif1	TSS12218,TSS2733,TSS3892,TSS3940,TSS44263,TSS44265,TSS54637	9:65587159-65595967	-0.333109483	4.475004418	9.467581836	0.002091349	0.328466241
ENSMUSG00000025597	Klhl4	TSS25051,TSS54391,TSS9274	X:114474332-114560829	0.230380386	5.752483858	9.434715504	0.002129161	0.330470861
ENSMUSG00000081974	Gm11960	TSS36382,TSS65754	11:4480867-4594863	-0.392212389	3.716617286	9.362950573	0.002214154	0.339666714
ENSMUSG00000055053	Nfic	TSS39289,TSS43893,TSS48284,TSS52950,TSS79607,TSS79986	10:81396185-81431005	-0.361342735	4.228948419	9.321690882	0.002264569	0.343407603
ENSMUSG00000063065	Mapk3	TSS21663,TSS35848,TSS4220,TSS82087	7:126759600-126765819	0.225542373	5.716827039	9.262330385	0.002339152	0.349948092
ENSMUSG00000028871	Rspo1	TSS49600,TSS56881	4:124957646-125009099	0.839738912	1.348078993	9.241165039	0.002366344	0.349948092
ENSMUSG00000051934	Spats2	TSS17852	15:99126577-99213206	0.281096189	5.209370323	9.225039301	0.002387276	0.349948092
ENSMUSG00000025105	Bnc1	TSS4380	7:81966671-81992618	0.729285802	2.180720531	9.192951289	0.002429489	0.352222443
ENSMUSG00000022391	Rangap1	TSS29931,TSS44765	15:81704247-81729919	-0.194065609	7.379852081	9.156299522	0.002478633	0.355441349
ENSMUSG00000024795	Kif20b	TSS49645	19:34922357-34975731	-0.206608163	6.033134504	9.084251031	0.0025782	0.365744074
ENSMUSG00000026494	Kif26b	TSS38123,TSS59737	1:178529124-178932855	-0.265626751	5.922136691	9.059455502	0.002613398	0.366793177
ENSMUSG00000020044	Timp3	TSS13045,TSS44113,TSS54004,TSS64848	10:86055124-86498896	0.252266304	7.483856433	9.029436879	0.002656663	0.368838494
ENSMUSG00000040722	Scamp5	TSS34745	9:57441327-57468024	0.373826312	3.759270393	9.008884694	0.002686703	0.368838494
ENSMUSG00000041431	Ccnb1	TSS11163,TSS25904,TSS33515,TSS48283,TSS50605,TSS54138,TSS83445	13:100778649-100786570	-0.185140602	6.527737072	8.991864173	0.002711842	0.368838494
ENSMUSG00000059970	Hspa2	TSS6087	12:76404175-76406934	0.377373644	3.920587855	8.963356807	0.002754483	0.370815281
ENSMUSG00000031708	Tecr	TSS35826,TSS52804	8:83571699-83594491	-0.230836625	6.360155187	8.885347123	0.002874684	0.37959037
ENSMUSG00000055435	Maf	TSS21393,TSS51100	8:115682941-115707794	0.452705822	3.04664342	8.883743155	0.00287721	0.37959037
ENSMUSG00000022037	Clu	TSS1135,TSS15785,TSS23328,TSS33136,TSS5409,TSS58493,TSS68015,TSS70401,TSS85942	14:65968482-65981548	0.246716412	6.128611095	8.820498161	0.002978653	0.3868327
ENSMUSG00000002265	Peg3	TSS31865,TSS47510,TSS76636	7:6703891-6730421	0.25195977	8.999568153	8.813104257	0.002990748	0.3868327
ENSMUSG00000027896	Slc16a4	TSS10679,TSS28819,TSS9616	3:107291229-107312115	-0.409123116	3.641054956	8.779665722	0.00304607	0.390071262
ENSMUSG00000044468	Fam46c	TSS21654,TSS28680,TSS86160	3:100451627-100489324	0.893528584	5.216972598	8.762472316	0.003074919	0.390071262
ENSMUSG00000058672	Tubb2a	TSS62576	13:34074300-34078008	-0.262651506	5.901920646	8.714974143	0.003156069	0.394944634
ENSMUSG00000026980	Ly75	TSS15040,TSS48873	2:60292102-60383303	-0.448286446	3.294515137	8.705101279	0.003173208	0.394944634
ENSMUSG00000016487	Ppfibp1	TSS10207,TSS21001,TSS25085,TSS37005,TSS5548,TSS66697,TSS79312,TSS8211,TSS85166	6:146888486-147032025	0.182634685	7.287639553	8.670803109	0.003233487	0.398685876
ENSMUSG00000042626	Shc1	TSS12700,TSS21335,TSS23866,TSS43036,TSS43044,TSS44894,TSS61093,TSS67671,TSS766	3:89418442-89430015	0.174075713	6.654358834	8.65085976	0.003269071	0.399341192
ENSMUSG00000020427	Igfbp3	TSS16538,TSS18848	11:7206085-7213923	0.273314333	5.763251719	8.609232707	0.003344632	0.40482318
ENSMUSG00000007877	Tcap	TSS21451	11:98383810-98384953	-0.253390227	5.712311433	8.542602957	0.003469292	0.405936816
ENSMUSG00000027555	Car13	TSS78044	3:14641726-14663002	0.630365691	1.693384441	8.538641187	0.003476851	0.405936816
ENSMUSG00000027195	Hsd17b12	TSS19012,TSS26986,TSS30367,TSS42555,TSS52779	2:94032688-94157964	-0.212296543	5.528107571	8.521809973	0.003509153	0.405936816
ENSMUSG00000038400	Pmepa1	TSS32003,TSS34609,TSS46975	2:173224457-173276533	-0.303472626	4.292080495	8.509027082	0.00353389	0.405936816
ENSMUSG00000029086	Prom1	TSS17592,TSS26622,TSS54828,TSS72498	5:43993624-44102513	0.46446124	2.570237981	8.507703595	0.003536461	0.405936816
ENSMUSG00000061518	Cox5b	TSS84426	1:36691486-36693385	-0.179738712	7.481194398	8.502331256	0.003546917	0.405936816
ENSMUSG00000005125	Ndrg1	TSS13582,TSS1683,TSS27798,TSS48623,TSS56647,TSS59429,TSS59527,TSS78880	15:66929320-67013039	0.423021333	6.243915433	8.490928386	0.003569216	0.405936816
ENSMUSG00000027360	Hdc	TSS44270,TSS45963,TSS72206,TSS74103,TSS74687	2:126593666-126619299	0.371157205	3.406317676	8.446452711	0.003657562	0.408196123
ENSMUSG00000017009	Sdc4	TSS13820,TSS64960	2:164424246-164443887	0.27416513	5.330545595	8.442598889	0.003665321	0.408196123
ENSMUSG00000054469	Lclat1	TSS1864,TSS26799,TSS55724,TSS66212,TSS79754	17:73107984-73243368	-0.230426469	7.780285506	8.368193366	0.00381845	0.408196123
ENSMUSG00000033031	C330027C09Rik	TSS16380,TSS32760,TSS39530,TSS41257,TSS42846,TSS46387,TSS64780,TSS71959	16:48994184-49019709	-0.220269591	6.291946816	8.363858553	0.00382757	0.408196123
ENSMUSG00000059734	Ndufs8	TSS45048	19:3908869-3912717	-0.186303017	6.937659523	8.362928587	0.003829529	0.408196123
ENSMUSG00000024640	Psat1	TSS15318,TSS3213,TSS35110,TSS38958,TSS72833,TSS77291,TSS83784	19:15904677-15947337	-0.254672389	6.099827424	8.347433986	0.003862324	0.408196123
ENSMUSG00000042644	Itpr3	TSS20301	17:27057303-27122223	0.364344408	4.347448618	8.333805218	0.003891406	0.408196123
ENSMUSG00000038459	Fam108c	TSS40302,TSS74055	7:84109355-84151893	-0.197774172	5.978771649	8.331839941	0.003895618	0.408196123
ENSMUSG00000026185	Igfbp5	TSS66290,TSS78960	1:72857931-72874884	0.32278695	8.213732961	8.311533695	0.003939411	0.408196123
ENSMUSG00000020866	Cacna1g	TSS22515,TSS34353,TSS45098,TSS57383,TSS62639,TSS73950,TSS7799	11:94408390-94474198	-0.231179561	5.724745342	8.300497774	0.003963421	0.408196123
ENSMUSG00000039384	Dusp10	TSS29569,TSS84679	1:184013301-184075636	-0.305859256	4.372296759	8.296280925	0.003972635	0.408196123
ENSMUSG00000028906	Epb4.1	TSS14806,TSS1571,TSS1573,TSS1577,TSS1817,TSS21553,TSS26051,TSS30554,TSS31551,TSS33561,TSS3977,TSS55911,TSS57941,TSS82110,TSS85491	4:131923412-132076992	0.255540125	7.126745198	8.294453169	0.003976635	0.408196123
ENSMUSG00000026708	Cenpl	TSS2699,TSS32617	1:161070766-161086724	-0.35830508	3.763576724	8.274543005	0.004020478	0.408196123
ENSMUSG00000038072	Galnt11	TSS17634,TSS18785,TSS29267,TSS37645	5:25222847-25265918	0.215837797	5.269233821	8.273744629	0.004022246	0.408196123
ENSMUSG00000021606	Ndufs6	TSS1712,TSS26402,TSS78175	13:73319837-73328542	-0.20005797	6.903603985	8.248198607	0.004079246	0.409475945
ENSMUSG00000022309	Angpt1	TSS60773	15:42424726-42704616	0.541618603	4.861220503	8.240346052	0.004096932	0.409475945
ENSMUSG00000020330	Hmmr	TSS18720,TSS50738,TSS60420	11:40701394-40733422	-0.203608385	7.023698167	8.17976192	0.004236032	0.413987791
ENSMUSG00000066705	Fxyd6	TSS1814	9:45370184-45396158	0.272219529	4.156489013	8.179061151	0.004237669	0.413987791
ENSMUSG00000026347	Tmem163	TSS10307,TSS21996,TSS39022	1:127486545-127678096	0.920200269	1.940088952	8.167805928	0.004264046	0.413987791
ENSMUSG00000032536	Trak1	TSS53450	9:121366957-121474916	-0.204462467	6.947945634	8.166298128	0.004267592	0.413987791
ENSMUSG00000031137	Fgf13	TSS29242,TSS3043,TSS39607,TSS39698,TSS69151,TSS71002,TSS72775,TSS77366	X:59062144-59568071	-0.275245889	4.702593931	8.139923639	0.004330111	0.416986502
ENSMUSG00000069633	Pex11c	TSS27696,TSS53680,TSS69478	8:3457104-3467680	0.42585356	2.772823699	8.110188028	0.004401716	0.420810436
ENSMUSG00000064349	mt-Tc	TSS21474	MT:5191-5257	0.283681167	6.79377	8.070788617	0.004498453	0.424656608
ENSMUSG00000052516	Robo2	TSS14391,TSS25822,TSS26981,TSS36018,TSS41075,TSS4891,TSS49745,TSS81648,TSS81730	16:73892305-74411825	-0.374910989	3.64798149	8.067621346	0.004506323	0.424656608
ENSMUSG00000031209	Heph	TSS19307,TSS6880,TSS7690,TSS79300	X:96306177-96574485	0.289752989	5.331839101	8.021723853	0.004621956	0.432464259
ENSMUSG00000021913	Ogdhl	TSS66850	14:32322018-32347820	0.313435553	4.723771716	8.001842587	0.004672977	0.434159086
ENSMUSG00000024588	Fech	TSS28296	18:64456549-64489066	0.217346855	6.472753621	7.982983279	0.004721907	0.43550321
ENSMUSG00000025278	Flnb	TSS36102	14:7817956-7951588	0.211007929	7.940085395	7.970924744	0.004753465	0.43550321
ENSMUSG00000011305	Plin5	TSS17253,TSS63879	17:56111600-56117596	0.574182139	2.937114957	7.949633197	0.004809712	0.436126753
ENSMUSG00000027699	Ect2	TSS15049,TSS22012,TSS23426,TSS29885,TSS42733,TSS42734,TSS59236,TSS62794,TSS63169,TSS6767,TSS82632	3:27097221-27153878	-0.202867287	6.527915737	7.943370529	0.004826386	0.436126753
ENSMUSG00000057103	Cml1	TSS46612,TSS68264,TSS83014	6:85910153-85915687	0.74832737	1.031558275	7.856389246	0.005064143	0.444346856
ENSMUSG00000027254	Mtap1a	TSS40196,TSS58731,TSS66324,TSS75910	2:121289599-121355396	-0.212803579	5.632646822	7.828395965	0.005143172	0.444346856
ENSMUSG00000026335	Pam	TSS14446,TSS17848,TSS25317,TSS28263,TSS28344,TSS29449,TSS31203,TSS42086,TSS56525,TSS59187,TSS6162,TSS680,TSS74025,TSS79716	1:97795113-98095646	0.226581739	10.73092862	7.826041279	0.005149877	0.444346856
ENSMUSG00000036006	Fam65b	TSS12394,TSS23270,TSS23661,TSS41084,TSS44437,TSS4526,TSS49376,TSS54309,TSS57090,TSS58287,TSS70926,TSS9414	13:24582188-24733816	-0.231373259	6.549091328	7.821461981	0.005162941	0.444346856
ENSMUSG00000034413	Neurl1b	TSS55795	17:26414964-26446338	-0.201055107	6.531551675	7.809988938	0.005195822	0.444346856
ENSMUSG00000035944	Ttc38	TSS2417,TSS5385	15:85832305-85858822	0.305118588	4.13311078	7.79471131	0.005239938	0.444346856
ENSMUSG00000097815	AC136215.1	TSS73536	6:18844219-18847360	0.178444487	8.835644822	7.790390519	0.005252484	0.444346856
ENSMUSG00000058056	Palld	TSS10185,TSS36177,TSS39990,TSS4261,TSS46221,TSS4916,TSS57763,TSS9934	8:61513245-61922834	-0.187744934	7.75858534	7.77421561	0.005299722	0.444346856
ENSMUSG00000027997	Casp6	TSS41884,TSS4720,TSS47259	3:129901424-129914103	0.304113676	4.218047992	7.773361817	0.005302228	0.444346856
ENSMUSG00000003813	Rad23a	TSS28082,TSS41999,TSS4341,TSS47309,TSS5869,TSS82312	8:84831521-84840665	-0.198596233	6.287524065	7.74374638	0.005389886	0.444346856
ENSMUSG00000003134	Tbc1d8	TSS71372	1:39367850-39478747	0.225361686	5.026461285	7.736968571	0.005410155	0.444346856
ENSMUSG00000037161	Mgarp	TSS14084,TSS17111,TSS30910,TSS31565,TSS6785	3:51388414-51396738	0.501292136	2.932691449	7.728623711	0.005435216	0.444346856
ENSMUSG00000005142	Man2b1	TSS29204	8:85083268-85098739	0.194347164	5.712681992	7.721885381	0.005455539	0.444346856
ENSMUSG00000034951	Cog7	TSS43445,TSS71012	7:121922838-121981711	0.25934548	4.711046529	7.717559214	0.005468628	0.444346856
ENSMUSG00000073788	Gm10576	TSS8735	4:101054557-101055262	-0.660256905	1.35364919	7.699332324	0.005524126	0.444346856
ENSMUSG00000068874	Selenbp1	TSS15539,TSS35417,TSS39242,TSS70403	3:94933055-94944758	0.346410329	5.644514078	7.699208502	0.005524505	0.444346856
ENSMUSG00000041920	Slc16a6	TSS27404,TSS28247,TSS370,TSS48893,TSS77063	11:109425945-109573330	0.389445277	3.626209373	7.693908452	0.005540751	0.444346856
ENSMUSG00000019944	Rhobtb1	TSS12166,TSS1540,TSS20470,TSS22729,TSS22890,TSS25003,TSS2744,TSS31507,TSS42496,TSS43761,TSS69638,TSS77867,TSS82453	10:69151433-69291791	0.21953751	5.983526943	7.689945829	0.005552929	0.444346856
ENSMUSG00000020532	Acaca	TSS18434,TSS30999,TSS53572,TSS65884,TSS8703	11:84129671-84401651	-0.214059146	6.642589644	7.688531504	0.005557283	0.444346856
ENSMUSG00000031517	Gpm6a	TSS3199	8:54954727-55060877	0.315574835	4.242793156	7.654370916	0.005663494	0.446178979
ENSMUSG00000010080	Epn3	TSS14944,TSS50923,TSS5782,TSS77134	11:94489598-94499974	-0.293615845	5.152871111	7.653666347	0.005665706	0.446178979
ENSMUSG00000007122	Casq1	TSS2158,TSS22998,TSS33255	1:172209893-172219868	-0.216733693	6.403691985	7.636030121	0.00572137	0.446178979
ENSMUSG00000028965	Tnfrsf9	TSS17525,TSS20570,TSS34835,TSS38822,TSS56401,TSS68902,TSS83332,TSS86004	4:150914561-151861876	0.508084116	2.166942441	7.629206743	0.005743056	0.446178979
ENSMUSG00000037355	4933407H18Rik	TSS36040,TSS44392	5:33378550-33419754	0.27313027	4.349956029	7.620678901	0.005770276	0.446178979
ENSMUSG00000059742	Kcnh7	TSS36149,TSS43735,TSS62961,TSS8623	2:62664284-63184287	0.669341928	3.374776449	7.616671605	0.005783113	0.446178979
ENSMUSG00000029528	Pxn	TSS10590,TSS21283,TSS24021,TSS24975,TSS27024,TSS37499,TSS38331,TSS4245,TSS43388,TSS65640,TSS73662,TSS78799,TSS81442	5:115506675-115555987	0.224550496	5.759855782	7.573219121	0.005924188	0.447456469
ENSMUSG00000057530	Ece1	TSS19925,TSS55328,TSS80671,TSS84850	4:137862236-137965229	0.233952523	7.321090438	7.57140089	0.005930167	0.447456469
ENSMUSG00000027408	Cpxm1	TSS64011,TSS73215	2:130390774-130397574	0.379252496	2.885031727	7.566653861	0.005945807	0.447456469
ENSMUSG00000086391	1700042O10Rik	TSS16334	11:11814100-11898144	-0.780671137	1.772200203	7.562939123	0.005958075	0.447456469
ENSMUSG00000021338	Lrrc16a	TSS19907,TSS28371,TSS36785,TSS37410,TSS46303,TSS49327,TSS49602,TSS53633,TSS62129,TSS62912,TSS68234,TSS68590	13:24012343-24280795	0.421309549	2.606491612	7.549259535	0.006003474	0.447456469
ENSMUSG00000006574	Slc4a1	TSS3527,TSS5084,TSS60175,TSS71404,TSS82960	11:102348823-102366203	0.679185694	3.563787258	7.540422514	0.006032989	0.447456469
ENSMUSG00000040904	Rnasek	TSS4590,TSS62176	11:70235205-70239842	-2.107416696	1.372783123	7.539200006	0.006037084	0.447456469
ENSMUSG00000039116	Gpr126	TSS83382	10:14402584-14545036	0.343319649	5.177093586	7.516656193	0.006113105	0.450559762
ENSMUSG00000031538	Plat	TSS39420	8:22757743-22782847	0.211834616	5.775985901	7.499314736	0.006172247	0.452391446
ENSMUSG00000027875	Hmgcs2	TSS30868	3:98280434-98310738	0.577935045	2.05952884	7.445808605	0.006358435	0.458189067
ENSMUSG00000023885	Thbs2	TSS70635	17:14665499-14694262	0.205067228	7.037061956	7.441126	0.006374999	0.458189067
ENSMUSG00000092395	Gm20463	TSS23514	17:34601090-34603690	-0.481233743	2.285777523	7.435495121	0.006394977	0.458189067
ENSMUSG00000020284	1810043G02Rik	TSS43471,TSS47375,TSS5821,TSS66296,TSS68532,TSS71622,TSS73245,TSS73256	10:77978523-77986905	0.30846858	4.169576386	7.433091934	0.006403522	0.458189067
ENSMUSG00000050840	Cdh20	TSS47738	1:104768528-104995481	-0.380292677	3.423866794	7.427067414	0.006424996	0.458189067
ENSMUSG00000029700	Slc13a1	TSS11136,TSS38766,TSS79326,TSS79328	6:24088282-24168092	-0.550485183	1.837373347	7.416127978	0.006464178	0.458504811
ENSMUSG00000022868	Ahsg	TSS3328	16:22892041-22899438	-0.665847751	3.244924559	7.37577317	0.006610836	0.46450979
ENSMUSG00000042743	Sgtb	TSS28425,TSS3253,TSS61111	13:104109740-104141735	0.597450221	1.511628008	7.372519085	0.006622809	0.46450979
ENSMUSG00000026687	Aldh9a1	TSS10166	1:167349990-167368530	0.271394496	4.727636132	7.363944643	0.006654465	0.46450979
ENSMUSG00000046598	Bdh1	TSS42674,TSS43216,TSS57016,TSS73360,TSS74572,TSS80581	16:31422279-31458901	-0.533809729	3.064326895	7.318653444	0.006824252	0.472031852
ENSMUSG00000022206	Npr3	TSS63304	15:11839895-11905674	0.254390844	7.061890718	7.316145689	0.006833782	0.472031852
ENSMUSG00000039347	Atp6v0e2	TSS42444	6:48537568-48541798	0.446309969	2.91253744	7.274398242	0.006994432	0.47226139
ENSMUSG00000032549	Rab6b	TSS18009	9:103112073-103185270	0.59544691	2.310568279	7.273210596	0.006999058	0.47226139
ENSMUSG00000020674	Pxdn	TSS11941,TSS4347,TSS55422,TSS63311,TSS78163	12:29938035-30017658	0.179026687	8.787818958	7.269453958	0.007013712	0.47226139
ENSMUSG00000024393	Prrc2a	TSS22513,TSS28393,TSS30154,TSS3073,TSS52956,TSS58152,TSS68806	17:35149075-35164897	-0.278632799	6.967042689	7.263651151	0.007036409	0.47226139
ENSMUSG00000054612	Mgmt	TSS68511	7:136894610-137128187	0.556943981	1.99640832	7.261086134	0.007046466	0.47226139
ENSMUSG00000059741	Myl3	TSS19215,TSS24290,TSS42692,TSS67607	9:110763645-110769804	-0.207100149	11.07501248	7.231203192	0.007164717	0.47226139
ENSMUSG00000063445	Nmral1	TSS25817,TSS37072,TSS37374,TSS58760,TSS69322,TSS81912	16:4710058-4719356	-0.395630158	3.909521667	7.228195537	0.007176731	0.47226139
ENSMUSG00000097781	CT010433.2	TSS45878	17:21528193-21535878	-0.60928658	1.393404156	7.218027855	0.007217496	0.47226139
ENSMUSG00000039640	Mrpl12	TSS13403,TSS76141	11:120484612-120489065	-0.204210817	6.69634493	7.194077776	0.007314457	0.47226139
ENSMUSG00000031665	Sall1	TSS79794	8:89027247-89044162	0.425765403	2.980702084	7.191250422	0.007325991	0.47226139
ENSMUSG00000048078	Tenm4	TSS13892,TSS14194,TSS24192,TSS37835,TSS38731,TSS4518,TSS54879,TSS61302,TSS66928,TSS68289	7:96171243-96947034	0.253049143	4.427955978	7.187457707	0.007341492	0.47226139
ENSMUSG00000002379	Ndufa11	TSS50453	17:56717761-56724248	-0.20152111	6.940896307	7.175030437	0.007392519	0.47226139
ENSMUSG00000017667	Zfp334	TSS59956	2:165374263-165388259	0.23162544	4.993913566	7.167414737	0.007423969	0.47226139
ENSMUSG00000043110	Lrrn4	TSS82932	2:132868304-132880891	0.345753135	3.974577138	7.166084313	0.007429477	0.47226139
ENSMUSG00000085499	Gm15713	TSS8554	16:42875880-43642602	-0.671681648	1.25174123	7.165889915	0.007430282	0.47226139
ENSMUSG00000062248	Cks2	TSS53034	13:51645231-51650660	-0.192252257	5.431924951	7.163907705	0.007438497	0.47226139
ENSMUSG00000085440	D330022K07Rik	TSS59098	8:45507787-45827906	-0.361567568	4.893459211	7.141835588	0.007530604	0.47226139
ENSMUSG00000074802	Gas2l3	TSS73416	10:89408822-89443967	-0.194583866	6.675806604	7.137918573	0.007547071	0.47226139
ENSMUSG00000006517	Mvd	TSS74630	8:119910359-124345724	-0.36454212	3.307748521	7.137194086	0.007550121	0.47226139
ENSMUSG00000039110	Mycbpap	TSS12568,TSS23563,TSS46085,TSS59444,TSS73937	11:94501346-94521742	0.407839691	3.53891502	7.136223934	0.007554206	0.47226139
ENSMUSG00000042426	Dhx29	TSS16341	13:112927729-112969431	-0.238106539	5.309514767	7.117538139	0.007633346	0.47226139
ENSMUSG00000027544	Nfatc2	TSS21165,TSS28604,TSS42564,TSS52162,TSS62738,TSS70297,TSS71117,TSS85056	2:168476409-168601657	-0.342733817	3.945162087	7.111578769	0.007658763	0.47226139
ENSMUSG00000028977	Casz1	TSS13452,TSS55105,TSS5829,TSS71461,TSS78499	4:148804428-148954889	-0.200404251	5.617316599	7.104876672	0.007687451	0.47226139
ENSMUSG00000038871	Bpgm	TSS12425,TSS28926,TSS29330,TSS58939,TSS83669	6:34476206-34505613	0.411448191	5.061276809	7.09307915	0.007738218	0.47226139
ENSMUSG00000025607	Copg2	TSS14214,TSS18486,TSS26891,TSS29963,TSS49315,TSS49320,TSS74581	6:30723546-30896794	0.185073545	8.867207255	7.092038946	0.007742711	0.47226139
ENSMUSG00000070699	Sars2	TSS71297	7:28741967-28753879	-0.366053807	3.716880565	7.086238814	0.00776781	0.47226139
ENSMUSG00000030189	Csda	TSS11740	6:131364857-131388450	-0.182418795	7.458820806	7.072562364	0.007827324	0.472681537
ENSMUSG00000020108	Ddit4	TSS4966	10:59949674-59951770	0.411958594	4.397669418	7.068206182	0.007846377	0.472681537
ENSMUSG00000028133	Rwdd3	TSS56132,TSS6845,TSS6851,TSS74188,TSS79916	3:121155399-121171695	0.551264628	1.585278605	7.057142604	0.007894982	0.473447742
ENSMUSG00000043243	Fam129c	TSS20916,TSS21464,TSS48142,TSS55134,TSS59795,TSS60429,TSS61948,TSS67144	8:71592175-71607936	0.610363748	1.349451012	7.033370777	0.008000462	0.475683825
ENSMUSG00000027078	Ube2l6	TSS15119,TSS46497,TSS47096,TSS65328	2:84798827-84810335	0.395888147	4.540004865	7.032493636	0.008004382	0.475683825
ENSMUSG00000069662	Marcks	TSS38489	10:37133374-37138920	0.184564661	7.310074866	7.013136664	0.00809138	0.477663649
ENSMUSG00000087368	BC065397	TSS17887,TSS29189,TSS36313,TSS44999,TSS64342,TSS6585,TSS83439	X:136732941-136803364	0.390601698	2.779509439	7.008997461	0.008110108	0.477663649
ENSMUSG00000039047	Pigk	TSS15841,TSS28528,TSS48830,TSS60539,TSS6533,TSS82750,TSS82753	3:152714099-152982246	-0.16737817	5.903697501	6.973177273	0.008274046	0.482285319
ENSMUSG00000034813	Grip1	TSS14237,TSS2037,TSS22830,TSS34462,TSS39340,TSS50286,TSS50349,TSS5088,TSS5167,TSS55385,TSS62809,TSS66461,TSS66465,TSS69912,TSS74917	10:119429366-120112987	0.463649	2.159457634	6.969639724	0.008290419	0.482285319
ENSMUSG00000018339	Gpx3	TSS11896,TSS331,TSS63027	11:54902452-54910377	0.598686395	5.872352462	6.967950954	0.008298247	0.482285319
ENSMUSG00000032193	Ldlr	TSS9971	9:21723575-21749916	-0.338117149	5.855612657	6.943184025	0.008413921	0.482614532
ENSMUSG00000031097	Tnni2	TSS35896,TSS39028,TSS53146,TSS53282,TSS60745,TSS6489	7:142441807-142444410	-0.636399205	1.782481034	6.937683658	0.008439834	0.482614532
ENSMUSG00000027978	Prss12	TSS30484	3:123446912-123506602	0.586381291	1.726961123	6.931063897	0.008471128	0.482614532
ENSMUSG00000042506	Usp22	TSS37000,TSS40534,TSS53905,TSS56147,TSS63619	11:61151784-61175055	0.199958892	6.926427597	6.930484171	0.008473875	0.482614532
ENSMUSG00000057604	Lmcd1	TSS23216	6:112273757-112330425	-0.22365602	5.206399001	6.92775475	0.008486817	0.482614532
ENSMUSG00000059278	Lsmd1	TSS36638,TSS59405,TSS69655,TSS81834	11:69391924-69398234	-0.359349647	3.163759555	6.897857151	0.008629913	0.48864566
ENSMUSG00000042116	Vwa1	TSS49890	4:155761177-155776161	0.34172657	3.622994059	6.875608855	0.008737998	0.492651339
ENSMUSG00000041445	Mmrn2	TSS85091	14:34375503-34404287	0.211988058	6.158666979	6.855484363	0.00883696	0.49611068
ENSMUSG00000038587	Akap12	TSS81652	10:4266328-4359468	0.171104911	8.313713573	6.818596345	0.009021345	0.504316097
ENSMUSG00000005397	Nid1	TSS2556	13:13437601-13512275	0.204244843	8.40078896	6.796011563	0.009136174	0.50840336
ENSMUSG00000071478	Hist1h2ad	TSS74453	13:23574380-23574952	-0.657706895	1.234777434	6.783997353	0.009197868	0.50840336
ENSMUSG00000043964	Orai3	TSS30525	7:127769814-127775150	0.315045582	3.967257108	6.780688839	0.009214932	0.50840336
ENSMUSG00000048782	Insc	TSS11415,TSS20557,TSS38050,TSS39829,TSS51569,TSS56617,TSS78850,TSS83098	7:114743693-114850380	-0.43716915	2.60417719	6.772239337	0.009258659	0.50840336
ENSMUSG00000032878	Ccdc85a	TSS24074,TSS29010,TSS37021,TSS73997,TSS78246,TSS8186	11:28385684-28584324	-0.515251358	2.67381992	6.762276802	0.009310489	0.50840336
ENSMUSG00000053898	Ech1	TSS10924,TSS14240,TSS17355,TSS51553,TSS65648,TSS73490	7:28825216-28832247	0.205539264	7.292021929	6.759368889	0.009325674	0.50840336
ENSMUSG00000097660	BX537302.1	TSS63580	7:34202121-34230289	0.312627989	3.91801171	6.736427443	0.009446361	0.512863554
ENSMUSG00000038143	Stox2	TSS36246,TSS81709	8:47180047-47446362	-0.211299255	5.763008415	6.713214146	0.009570108	0.517452597
ENSMUSG00000031387	Renbp	TSS13029,TSS22780,TSS24133,TSS26581,TSS26584,TSS52391,TSS54753,TSS58564,TSS63713,TSS9712	X:73922120-73930850	0.261512956	4.730605122	6.690074243	0.009695117	0.51888937
ENSMUSG00000057967	Fgf18	TSS18702,TSS31100	11:33117429-33147400	-0.528870565	2.453917896	6.683848681	0.009729034	0.51888937
ENSMUSG00000045136	Tubb2b	TSS59656	13:34127007-34130354	-0.231678303	6.484537509	6.682539315	0.009736183	0.51888937
ENSMUSG00000032231	Anxa2	TSS22586,TSS228,TSS2366,TSS40987,TSS46334,TSS55476	9:69453619-69491795	0.16770457	8.575875873	6.678305457	0.009759336	0.51888937
ENSMUSG00000010054	Tusc2	TSS64581	9:107551554-107568415	0.263122423	4.481852582	6.672107098	0.009793334	0.51888937
ENSMUSG00000051495	Irf2bp2	TSS9193	8:126566969-126593436	0.19731927	7.134194982	6.653170187	0.009897956	0.521406205
ENSMUSG00000058070	Eml1	TSS27612,TSS35670,TSS42280,TSS55102,TSS57155,TSS617,TSS6713,TSS76444	12:108370956-108702306	0.182414856	6.933229466	6.643095673	0.009954082	0.521406205
ENSMUSG00000049796	Crh	TSS29421	3:19693400-19695396	-0.675068491	1.350602713	6.64086403	0.009966559	0.521406205
ENSMUSG00000096956	AC137123.1	TSS2875	15:32240568-32244662	0.275980541	3.666116427	6.635088752	0.009998921	0.521406205
ENSMUSG00000032892	Rangrf	TSS21615,TSS32261,TSS42410,TSS56104,TSS58085,TSS71003,TSS76296,TSS77485	11:68968130-68975185	-0.346286601	3.911204268	6.623288114	0.010065384	0.522805547
ENSMUSG00000033685	Ucp2	TSS10520,TSS13615,TSS20408,TSS40056,TSS47635,TSS69429,TSS72842,TSS74875,TSS84897	7:100493336-100502020	0.308248503	4.087038946	6.605123256	0.010168576	0.526094233
ENSMUSG00000025270	Alas2	TSS18124,TSS19508,TSS45308,TSS79907	X:150519518-150643878	0.885514818	6.250163933	6.59506657	0.010226173	0.527007436
ENSMUSG00000042604	Kcna4	TSS26658,TSS58704	2:107290638-107298502	-0.258082817	4.744232695	6.58106306	0.010306932	0.52910254
ENSMUSG00000026235	Epha4	TSS18539	1:77367184-77515088	0.324006668	5.462305469	6.557362785	0.010445105	0.533569578
ENSMUSG00000053897	Slc39a8	TSS14782,TSS2396,TSS32397,TSS34929,TSS34992,TSS59593	3:135825278-135888572	0.483708467	4.039400365	6.552305087	0.010474837	0.533569578
ENSMUSG00000041308	Sntb2	TSS24539	8:106935749-107014192	0.201345962	5.36772783	6.54320809	0.010528532	0.534242003
ENSMUSG00000027500	Stmn2	TSS27588	3:8509526-8561604	0.636303251	1.597931571	6.5315686	0.010597646	0.535688673
ENSMUSG00000038370	Pcp4l1	TSS45731	1:171173261-171196268	-0.267626982	5.500772377	6.523418969	0.010646314	0.53609476
ENSMUSG00000089901	Gm8113	TSS29788	14:43925389-43933411	0.20647122	8.043947029	6.502597677	0.0107717	0.536441081
ENSMUSG00000021876	Rnase4	TSS72553,TSS9120	14:51091076-51106151	0.249007172	4.417298082	6.502573421	0.010771847	0.536441081
ENSMUSG00000038156	Spon1	TSS16899,TSS71349	7:113765997-114043370	0.236514422	6.471010977	6.50098651	0.010781465	0.536441081
ENSMUSG00000002831	Plin4	TSS49073	17:56079656-56109802	0.330764353	7.085809265	6.491554294	0.010838817	0.536441081
ENSMUSG00000022803	Popdc2	TSS16807,TSS31834,TSS70349,TSS73406,TSS74696	16:38346990-38378216	-0.166087023	8.742278908	6.47532641	0.010938222	0.536441081
ENSMUSG00000036181	Hist1h1c	TSS77474	13:23738806-23740366	-0.259845454	7.219807744	6.472647561	0.010954722	0.536441081
ENSMUSG00000003762	Adck4	TSS25218,TSS32651,TSS41668,TSS43338,TSS4702,TSS62251,TSS73690	7:27233022-27282144	0.342652464	3.51260545	6.466532395	0.010992481	0.536441081
ENSMUSG00000044934	Zfp367	TSS2143,TSS36960,TSS6390	13:64133021-64153202	-0.165575546	6.578784158	6.4481691	0.011106674	0.536441081
ENSMUSG00000051650	B3gnt2	TSS48711,TSS54006,TSS63756	11:22758593-22982382	0.921576922	1.901523807	6.447696077	0.011109632	0.536441081
ENSMUSG00000031673	Cdh11	TSS67605	8:102632994-102785111	0.174214125	6.617927532	6.435500678	0.011186162	0.536441081
ENSMUSG00000064288	Hist1h4k	TSS37169	13:21750193-21750505	-0.65150017	1.822894877	6.426032571	0.011245951	0.536441081
ENSMUSG00000028717	Tal1	TSS33173,TSS53343,TSS65921,TSS71008	4:115056425-115071755	0.308041132	3.372184015	6.418885023	0.011291303	0.536441081
ENSMUSG00000050908	Fam18a	TSS10720,TSS21668,TSS30877,TSS66321,TSS81468	16:10411947-10447362	0.383461924	3.097836456	6.41830708	0.011294978	0.536441081
ENSMUSG00000039345	Mettl22	TSS44165,TSS45218,TSS52666,TSS59392,TSS84609	16:8470787-8490684	-0.258931097	4.546531211	6.412732042	0.011330495	0.536441081
ENSMUSG00000041530	Eif2c1	TSS19466,TSS2827,TSS67736,TSS68669,TSS72803	4:126435011-126468583	0.190071639	5.389018688	6.406477218	0.011370479	0.536441081
ENSMUSG00000026480	Ncf2	TSS78027	1:152807889-152836990	0.393158548	2.379421384	6.402759047	0.011394315	0.536441081
ENSMUSG00000027459	Fam110a	TSS40264,TSS65874,TSS78433,TSS84086	2:151969397-151980219	-0.562319426	1.588998661	6.370238285	0.011605001	0.536441081
ENSMUSG00000041616	Nppa	TSS53047	4:148000721-148004014	0.751852661	8.028785088	6.362517659	0.011655604	0.536441081
ENSMUSG00000025417	Pip4k2c	TSS59065	10:127190377-127211622	0.219661597	5.018153171	6.361820644	0.011660184	0.536441081
ENSMUSG00000047139	Cd24a	TSS47600	10:43579168-43584262	0.357263227	5.581922744	6.358462642	0.011682272	0.536441081
ENSMUSG00000010406	Mrpl52	TSS36050	14:54426908-54429750	-0.253449495	4.154570109	6.354842569	0.011706133	0.536441081
ENSMUSG00000024962	Vegfb	TSS54686,TSS70416,TSS79909	19:6982472-6987651	-0.210563511	5.901122299	6.346231308	0.011763093	0.536441081
ENSMUSG00000027070	Lrp2	TSS13193,TSS32031,TSS76647	2:69424339-69586065	0.56088469	3.003667143	6.345981474	0.01176475	0.536441081
ENSMUSG00000061816	Myl1	TSS11939,TSS18756,TSS46109,TSS52553,TSS54333,TSS56738	1:66924294-66945404	0.680792002	5.47611521	6.338932787	0.011811593	0.536441081
ENSMUSG00000018446	C1qbp	TSS1074,TSS17830,TSS77599	11:70977835-70983026	-0.168478742	6.728492215	6.338681222	0.011813268	0.536441081
ENSMUSG00000025889	Snca	TSS44099,TSS63069	6:60731572-60829855	0.772422896	4.043464262	6.338090397	0.011817204	0.536441081
ENSMUSG00000015365	Mov10l1	TSS19869,TSS62070,TSS77147,TSS82606	15:88982908-89055152	-0.211708675	5.785708072	6.334674529	0.011839984	0.536441081
ENSMUSG00000005233	Spc25	TSS12217,TSS22806,TSS25614,TSS4308,TSS4326,TSS59169,TSS70056,TSS79032,TSS83637	2:69193894-69206194	-0.224178333	5.829489828	6.332770032	0.011852705	0.536441081
ENSMUSG00000064345	mt-Nd2	TSS70980	MT:3913-5016	-0.193490916	10.23994455	6.330133326	0.011870339	0.536441081
ENSMUSG00000019564	Arid3a	TSS30875,TSS49260,TSS70055,TSS72865,TSS8253	10:79927042-79955018	0.43858819	2.853920138	6.329732381	0.011873023	0.536441081
ENSMUSG00000022389	Tef	TSS10664,TSS29128,TSS52630,TSS55979,TSS56071,TSS6304,TSS64823,TSS72802,TSS7286,TSS77875	15:81800790-81826861	0.167971812	6.328542396	6.31427715	0.011976956	0.538487308
ENSMUSG00000045613	Chrm2	TSS26073,TSS76208	6:36209619-36528414	-0.237431056	6.879782501	6.303367121	0.012050886	0.538487308
ENSMUSG00000064604	Snora44	TSS571	4:132308677-132311024	-0.668117054	1.616442715	6.302101175	0.012059495	0.538487308
ENSMUSG00000049327	Setd8	TSS10286,TSS3968,TSS56700,TSS5993,TSS65139,TSS65166,TSS67424,TSS70660,TSS76472,TSS84664	5:124439929-124462308	-0.171302456	6.510532325	6.298858172	0.012081577	0.538487308
ENSMUSG00000030607	Acan	TSS33513	7:79053482-79115099	-0.650087486	2.341630963	6.282022141	0.012196885	0.538761207
ENSMUSG00000028873	Cdca8	TSS11665,TSS14371,TSS2128,TSS25596,TSS78843,TSS8620	4:124918464-124944656	-0.176805362	5.760704135	6.278817491	0.012218961	0.538761207
ENSMUSG00000027963	Extl2	TSS1647,TSS34588,TSS50776,TSS60173,TSS78111	3:116007461-116029016	0.255122625	4.869343706	6.274647023	0.012247752	0.538761207
ENSMUSG00000064655	SNORA55	TSS43872	4:123262350-123298925	-0.545136312	3.344003343	6.269137525	0.012285893	0.538761207
ENSMUSG00000024835	Coro1b	TSS2541,TSS35554,TSS3660,TSS45216,TSS45219,TSS66596,TSS7984,TSS82362	19:4148618-4154035	0.204327625	6.229392334	6.265534613	0.012310902	0.538761207
ENSMUSG00000023089	Ndufa5	TSS39562,TSS43416,TSS57163,TSS59757	6:24518665-24528013	-0.18255766	7.337998861	6.262394064	0.012332743	0.538761207
ENSMUSG00000002059	Rab34	TSS25567,TSS44559,TSS45474,TSS50230,TSS51838,TSS53917,TSS62454,TSS76452	11:78188429-78192193	0.25490582	4.324277183	6.221131068	0.012623444	0.548795992
ENSMUSG00000025477	Inpp5a	TSS50531,TSS6597,TSS6750,TSS72117,TSS76782,TSS84232	7:139389108-139582797	-0.168695389	7.166156424	6.218020216	0.012645644	0.548795992
ENSMUSG00000038725	Pkhd1l1	TSS71513	15:44457552-44597143	0.23548745	5.581317983	6.190046011	0.012847085	0.555710123
ENSMUSG00000022453	Naga	TSS84581	15:82329531-82338826	0.236422863	4.748615649	6.159374729	0.013071741	0.561791662
ENSMUSG00000041782	Lad1	TSS70707	1:135818597-135833341	0.576489747	2.168493959	6.15922536	0.013072845	0.561791662
ENSMUSG00000027533	Fabp5	TSS11242,TSS70338	3:10012547-10016607	0.198956458	7.066318424	6.121090696	0.013357836	0.570451688
ENSMUSG00000086938	4930481A15Rik	TSS21885,TSS38259,TSS47886,TSS60561,TSS85796	19:5406739-5424979	0.57165576	2.211014366	6.120693062	0.013360841	0.570451688
ENSMUSG00000037172	E330009J07Rik	TSS29833,TSS29841	6:40401374-40436135	0.300857474	3.737286612	6.099865736	0.013519215	0.575351637
ENSMUSG00000052957	Gas1	TSS78498	13:60174404-60177365	0.2143044	4.77232074	6.070248701	0.01374776	0.57810182
ENSMUSG00000021286	Zfyve21	TSS46407	12:111814169-111828388	-0.238986918	4.539725257	6.063851197	0.013797647	0.57810182
ENSMUSG00000042613	Pbxip1	TSS26486,TSS34399,TSS60274,TSS6040,TSS78251	3:89436705-89450952	0.16025837	6.974418537	6.061360279	0.013817122	0.57810182
ENSMUSG00000001930	Vwf	TSS11428,TSS21477,TSS26283,TSS31555,TSS3211,TSS43950,TSS47607,TSS67086,TSS7058,TSS82556	6:125546773-125686679	0.357324128	6.847119034	6.057959681	0.013843754	0.57810182
ENSMUSG00000015766	Eps8	TSS12963,TSS18712,TSS20361,TSS25686,TSS25880,TSS26705,TSS43124,TSS4476,TSS46023,TSS68678,TSS83286	6:137477244-137654876	0.206417712	5.245407919	6.052793368	0.013884315	0.57810182
ENSMUSG00000075528	Aarsd1	TSS35742,TSS55170,TSS63664,TSS6948	11:101406691-101435673	-0.264985416	4.531917153	6.052532572	0.013886366	0.57810182
ENSMUSG00000048731	Ggnbp1	TSS1355,TSS19952,TSS22242,TSS27945,TSS35103,TSS77180	17:26973166-27036378	0.257744725	4.709623521	6.051289463	0.013896145	0.57810182
ENSMUSG00000025383	Il23a	TSS64210	10:128296139-128298084	-0.429337313	2.527543942	6.039180311	0.013991779	0.57810182
ENSMUSG00000023224	Serping1	TSS12781,TSS57498,TSS65482	2:84765386-84775444	0.258093049	4.242537475	6.033775522	0.014034683	0.57810182
ENSMUSG00000027111	Itga6	TSS1734,TSS21333,TSS30938,TSS43692,TSS46182,TSS61004,TSS72625,TSS75157	2:71745615-71858416	0.160429299	7.796952467	6.030400423	0.014061543	0.57810182
ENSMUSG00000024079	Eif2ak2	TSS20038,TSS31176,TSS39413,TSS85442	17:78852563-78906992	-0.246132247	5.798764578	6.027584591	0.014083993	0.57810182
ENSMUSG00000063200	Nol7	TSS76224	13:43398375-43480973	-0.178997099	5.589993006	6.02326106	0.014118535	0.57810182
ENSMUSG00000032374	Plod2	TSS13350,TSS21913,TSS60621,TSS8946	9:92542222-92608428	0.15723323	6.70986575	6.018897967	0.014153482	0.57810182
ENSMUSG00000040289	Hey1	TSS20303	3:8663361-8667039	0.366791305	4.4500284	6.002228827	0.014287817	0.58155089
ENSMUSG00000020717	Pecam1	TSS12906,TSS24498,TSS47387,TSS50221,TSS57466,TSS58860	11:106654216-106750628	0.183862057	8.03354772	5.997509848	0.014326085	0.58155089
ENSMUSG00000002250	Ppard	TSS44968,TSS46102,TSS55314,TSS62364,TSS78989,TSS81689	17:28232753-28301469	-0.431326609	2.746571513	5.975128893	0.014509021	0.587170289
ENSMUSG00000041881	Ndufa7	TSS1783,TSS26378,TSS4179,TSS4183,TSS54134,TSS6463,TSS71009,TSS79028,TSS8287	17:33824590-33838316	-0.150611861	6.588382542	5.965702497	0.014586788	0.587195375
ENSMUSG00000045671	Spred2	TSS18523,TSS65305,TSS69748	11:19924374-20024026	-0.299491006	3.728841143	5.964268342	0.014598657	0.587195375
ENSMUSG00000028461	Ccdc107	TSS19295,TSS28969,TSS32418,TSS49059,TSS81777	4:43492787-43495921	-0.251997714	8.588636611	5.958578204	0.014645847	0.587302927
ENSMUSG00000020810	Cygb	TSS54506	11:116645594-116668389	0.284572348	3.856279381	5.951497862	0.014704786	0.587879528
ENSMUSG00000020022	Ndufa12	TSS23796,TSS51064,TSS79204,TSS8473	10:94198954-94221443	-0.158407551	6.895036347	5.920123593	0.014968908	0.595011705
ENSMUSG00000070469	Adamtsl3	TSS12111,TSS40997,TSS56395,TSS7227,TSS72337	7:82335693-82614450	-0.25364655	4.470026568	5.91470402	0.015015025	0.595011705
ENSMUSG00000020186	Csrp2	TSS34434	10:110920176-110939599	0.219893946	6.291829589	5.914297909	0.015018487	0.595011705
ENSMUSG00000018474	Chd3	TSS17858,TSS23241,TSS26457,TSS39184,TSS50572,TSS51326,TSS55450,TSS71373,TSS73124	11:69343272-69369408	0.17462137	6.789656286	5.90306044	0.0151146	0.59538542
ENSMUSG00000030337	Vamp1	TSS53797,TSS60379,TSS67255	6:125215550-125244543	0.249807727	4.054810057	5.902643539	0.015118177	0.59538542
ENSMUSG00000093701	RP23-190G10.4	TSS49026	16:91372782-91425834	-0.793378438	1.802965092	5.890216311	0.01522523	0.597816847
ENSMUSG00000021453	Gadd45g	TSS56291,TSS58712	13:51846677-51848468	-0.465155707	3.247610399	5.867020429	0.015427142	0.602266873
ENSMUSG00000027679	Dnajc19	TSS34318,TSS43357,TSS56691,TSS74327	3:34020078-34081321	-0.195483167	5.153089752	5.866709752	0.015429865	0.602266873
ENSMUSG00000074064	Mlycd	TSS32305,TSS51646	8:119394877-119411102	0.216176762	5.069312426	5.833769307	0.015721403	0.611836207
ENSMUSG00000018770	Atp5g3	TSS36545,TSS61796,TSS68516,TSS69705,TSS69706	2:73908446-73911326	-0.156230576	9.763072842	5.828145717	0.015771739	0.611948505
ENSMUSG00000019795	Pcmt1	TSS1329,TSS1331,TSS5569,TSS55748,TSS57526,TSS71993,TSS84150,TSS885	10:7629372-7681136	-0.147346464	6.578980097	5.822238686	0.015824791	0.611948505
ENSMUSG00000067276	Capn6	TSS30445,TSS84030	X:143802230-143827414	0.312738786	6.534273388	5.817947955	0.015863442	0.611948505
ENSMUSG00000004187	Kifc2	TSS34391	15:76660640-76668196	0.425446208	2.201824013	5.810726176	0.015928715	0.612675052
ENSMUSG00000053553	3110082I17Rik	TSS47816	5:139359738-139460502	-0.520431248	2.465026201	5.787788074	0.016137882	0.618915919
ENSMUSG00000014329	Bicc1	TSS12864,TSS30322,TSS40936,TSS71704	10:70868668-71159700	0.160909482	5.996990118	5.758884518	0.016405484	0.627355214
ENSMUSG00000089536	Scarna3a	TSS84794	1:159232325-159347580	-0.611114775	1.813062537	5.750889388	0.016480311	0.628395216
ENSMUSG00000048965	Mrgpre	TSS50089	7:143778364-143784500	-0.385146219	2.511571884	5.743245223	0.016552183	0.629316851
ENSMUSG00000021070	Bdkrb2	TSS12026	12:105563171-105593071	0.644245943	1.098535157	5.728899491	0.016687937	0.632655051
ENSMUSG00000026181	Ppm1f	TSS3076,TSS49384	16:16896468-16927364	0.157162249	6.803622696	5.700061659	0.016964317	0.641290069
ENSMUSG00000020911	Krt19	TSS38322,TSS39306,TSS8644	11:100140809-100148665	0.52118275	3.648185928	5.683372517	0.017126417	0.645568063
ENSMUSG00000021273	Fdft1	TSS55056	14:63122461-63177793	-0.254153853	5.02335997	5.668543251	0.017271793	0.648266582
ENSMUSG00000028476	Reck	TSS57877,TSS986	4:43875529-43944806	0.298749483	4.005569617	5.663335459	0.017323149	0.648266582
ENSMUSG00000023940	Sgol1	TSS22418,TSS55727,TSS76646	17:53674785-53689333	-0.222423098	4.607016607	5.661082094	0.017345418	0.648266582
ENSMUSG00000091549	Gm6548	TSS32772	17:78850791-78851956	-0.343029999	3.565796681	5.653874192	0.017416852	0.649097531
ENSMUSG00000012428	Steap4	TSS62387	5:7960471-7982213	-0.481685854	3.510241333	5.639850814	0.017556701	0.651434588
ENSMUSG00000031328	Flna	TSS19016,TSS19512,TSS22590,TSS26819,TSS40202,TSS43951,TSS4611,TSS48668,TSS54856,TSS58005,TSS65290,TSS67542,TSS71717,TSS84425,TSS9773	X:74223460-74249820	0.166024693	10.03814665	5.637693728	0.017578315	0.651434588
ENSMUSG00000038141	Tmem181a	TSS63795	17:6270474-6305783	0.33237097	2.873957055	5.628907348	0.01766664	0.652072228
ENSMUSG00000024538	Ppic	TSS65771	18:53406340-53418007	0.147585675	6.347246195	5.626157941	0.017694373	0.652072228
ENSMUSG00000049580	Tsku	TSS16013,TSS3031,TSS34063	7:98350667-98361328	0.330034953	2.942590961	5.617248072	0.017784553	0.652136801
ENSMUSG00000021974	Fgf9	TSS17861,TSS30157,TSS52783,TSS69475	14:58070546-58112337	-0.325684166	3.569011335	5.615161534	0.01780574	0.652136801
ENSMUSG00000029178	Klf3	TSS39496,TSS54466	5:64708206-64830129	0.238244123	4.497121828	5.611359206	0.017844416	0.652136801
ENSMUSG00000041607	Mbp	TSS10033,TSS15259,TSS20478,TSS26726,TSS28610,TSS32809,TSS34520,TSS51701,TSS57195,TSS65383,TSS72128,TSS77408,TSS83959	18:82475145-82585637	0.46510262	2.390707977	5.598747876	0.017973319	0.653260292
ENSMUSG00000027160	Ccdc34	TSS11229,TSS16605,TSS37546,TSS59852,TSS62196,TSS64101,TSS78945	2:110017816-110173360	-0.190120625	5.057763739	5.598662952	0.01797419	0.653260292
ENSMUSG00000054690	Emcn	TSS48109,TSS50191,TSS81658	3:137341066-137432185	0.162765509	6.229669247	5.584041503	0.018124849	0.654447275
ENSMUSG00000000876	Pxmp4	TSS46126,TSS49481	2:154585757-154603708	0.258000901	4.133450048	5.577899317	0.018188527	0.654447275
ENSMUSG00000049281	Scn3b	TSS11176,TSS19074,TSS36455,TSS4003,TSS48627,TSS49968,TSS51172,TSS81858,TSS86147	9:40269215-40291618	0.616652599	1.475280701	5.577620358	0.018191424	0.654447275
ENSMUSG00000097542	AC098877.1	TSS53288	14:55854035-55874735	0.208067385	5.535802514	5.574363239	0.018225291	0.654447275
ENSMUSG00000034744	Nagk	TSS29146,TSS33218,TSS49722,TSS51746,TSS68217,TSS765,TSS77215,TSS85862	6:83794981-83803420	0.181076268	5.187774166	5.564177841	0.018331617	0.654447275
ENSMUSG00000090860	Gm17134	TSS33323	10:79851380-79883174	0.299597218	3.25392359	5.561102298	0.018363848	0.654447275
ENSMUSG00000000901	Mmp11	TSS6516,TSS65486,TSS66183,TSS70905,TSS79899	10:75923221-75932502	0.291332173	3.610570967	5.55642019	0.018413029	0.654447275
ENSMUSG00000022820	Ndufb4	TSS15930,TSS7044	16:37647169-37654453	-0.146076857	6.3244692	5.556049316	0.01841693	0.654447275
ENSMUSG00000046079	Lrrc8d	TSS17447,TSS21547,TSS27861,TSS30181,TSS32307,TSS39980,TSS48289,TSS50419,TSS58900,TSS84727	5:105699968-105832436	0.260984588	4.176136937	5.54610056	0.018521906	0.654447275
ENSMUSG00000025732	Fam195a	TSS70616	17:25794570-25985680	-0.269785607	5.509830039	5.536364741	0.018625234	0.654447275
ENSMUSG00000030681	Mvp	TSS36431,TSS44772	7:126986859-127021211	0.26912917	4.336854986	5.532899252	0.018662157	0.654447275
ENSMUSG00000057596	Trim30d	TSS33202,TSS57672,TSS78786	7:104470013-104507849	-0.631926853	1.131550247	5.52289601	0.018769162	0.654447275
ENSMUSG00000059852	Kcng2	TSS5515	18:80294543-80364254	-0.196122879	5.729170183	5.522026691	0.018778491	0.654447275
ENSMUSG00000089855	Gm15662	TSS63938	10:105187662-105583874	-0.225635907	7.600832883	5.518989525	0.018811122	0.654447275
ENSMUSG00000041219	Arhgap11a	TSS11575,TSS453,TSS54680,TSS82996	2:113831491-113848661	-0.167038406	6.594742685	5.511772355	0.018888897	0.654447275
ENSMUSG00000031558	Slit2	TSS1412,TSS2475,TSS26076,TSS27381,TSS27628,TSS27856,TSS30760,TSS40691,TSS43794,TSS44274,TSS55308,TSS67356,TSS73458,TSS73496,TSS83179,TSS83739	5:47983154-48306282	0.175361593	6.286153058	5.509304958	0.018915562	0.654447275
ENSMUSG00000050323	Ndufaf6	TSS32403,TSS39248,TSS62749,TSS62750,TSS63006,TSS80758	4:11051044-11076205	-0.253030132	3.894366929	5.508455019	0.018924757	0.654447275
ENSMUSG00000030409	Dmpk	TSS13039,TSS14016,TSS17070,TSS18678,TSS29456,TSS31350,TSS38081,TSS40387,TSS57254,TSS63380,TSS65882,TSS67242,TSS74253,TSS77294,TSS77822,TSS85694	7:19083848-19093821	-0.196116674	6.323214879	5.507025055	0.018940236	0.654447275
ENSMUSG00000035439	Haus8	TSS14494,TSS44991,TSS60345,TSS6112,TSS70000,TSS72272,TSS78814	8:71248560-71360712	-0.202251092	6.385818514	5.50618313	0.018949356	0.654447275
ENSMUSG00000042826	Fgf11	TSS37576,TSS53163	11:69796067-69801857	0.321645133	3.972006297	5.494684565	0.019074369	0.655926245
ENSMUSG00000019986	Ahi1	TSS60195,TSS6776	10:20952546-21080428	0.328604864	3.3621797	5.48769537	0.019150771	0.655926245
ENSMUSG00000087611	4930458D05Rik	TSS60214	5:100840796-100899102	0.363506503	2.515983844	5.48743229	0.019153653	0.655926245
ENSMUSG00000085385	9430008C03Rik	TSS30768,TSS3552,TSS3553,TSS38600,TSS57861,TSS75907,TSS77006,TSS83083	2:158355306-158361580	0.255056061	4.298818761	5.459804142	0.019458828	0.655926245
ENSMUSG00000019738	Polr2i	TSS10815,TSS24437,TSS31478,TSS64466,TSS73248,TSS80689,TSS85755	7:30224130-30233390	-0.299443352	3.895871864	5.459329608	0.019464113	0.655926245
ENSMUSG00000048485	Zbtb8b	TSS37315,TSS4553,TSS69195,TSS69259	4:129425764-129440853	0.483137183	3.743683741	5.459022127	0.019467539	0.655926245
ENSMUSG00000036620	Mgat4b	TSS15081,TSS19830,TSS4040,TSS685,TSS76986	11:50210889-50235103	-0.228341126	5.351619003	5.456906948	0.019491119	0.655926245
ENSMUSG00000044548	Dact1	TSS72759,TSS9834	12:71309883-71321660	0.330038754	3.210341858	5.453574551	0.01952833	0.655926245
ENSMUSG00000003452	Bicd1	TSS15310,TSS18695,TSS31512,TSS46937,TSS47276,TSS49228,TSS55835	6:149408983-149563329	-0.30655368	4.258538479	5.453386711	0.01953043	0.655926245
ENSMUSG00000029253	Cenpc1	TSS19281	5:86012042-86065583	-0.179131224	5.409473061	5.451170506	0.01955522	0.655926245
ENSMUSG00000040170	Fmo2	TSS1646,TSS4599,TSS67216,TSS75104,TSS9763	1:162874316-162898726	0.372339427	2.874361787	5.449625555	0.019572521	0.655926245
ENSMUSG00000001240	Ramp2	TSS13817,TSS26765,TSS3335,TSS5290,TSS53360,TSS64283,TSS69520,TSS83167	11:101246027-101259549	0.177264922	5.694094863	5.44737677	0.019597732	0.655926245
ENSMUSG00000015243	Abca1	TSS52334,TSS62030	4:53030786-53159895	0.27186042	6.701727936	5.44374579	0.01963851	0.655926245
ENSMUSG00000026773	Pfkfb3	TSS21325,TSS22205,TSS2982,TSS46314,TSS54163,TSS57489,TSS58400,TSS6276,TSS6642,TSS80044,TSS82774	2:11471429-11502101	0.298146288	4.63193947	5.433057442	0.019759056	0.657702822
ENSMUSG00000050919	Zfp366	TSS37481	13:99184822-99247037	-0.409546241	2.42741203	5.430200557	0.019791406	0.657702822
ENSMUSG00000057577	Gm10025	TSS12734	5:48389501-49524904	-0.396466475	3.671529483	5.418673486	0.019922491	0.660315911
ENSMUSG00000054675	Tmem119	TSS10757,TSS83149	5:113793728-113800516	0.342599542	3.371989102	5.412812385	0.019989486	0.660315911
ENSMUSG00000005220	Corin	TSS36988,TSS38150,TSS46376,TSS71559,TSS81532,TSS81538	5:72300024-72504473	0.188244959	7.724602211	5.41013307	0.02002019	0.660315911
ENSMUSG00000053964	Lgals4	TSS20056,TSS21559,TSS3145,TSS35094,TSS43470,TSS75627	7:28833974-28841703	0.591412538	2.248227734	5.399229538	0.020145643	0.662796676
ENSMUSG00000063564	Col23a1	TSS62740,TSS65671	11:51289919-51583918	0.357618469	4.41363135	5.393617482	0.02021053	0.663277431
ENSMUSG00000031629	Mlf1ip	TSS14329,TSS1492,TSS19258,TSS34990,TSS66067,TSS68486,TSS77961	8:46552054-46617212	-0.435799554	2.603486787	5.379089088	0.020379516	0.666644688
ENSMUSG00000026605	Cenpf	TSS30569,TSS38935,TSS64110	1:189640598-189688086	-0.180819565	8.275881301	5.374495434	0.02043325	0.666644688
ENSMUSG00000051855	Mest	TSS10254,TSS17554,TSS18055,TSS57193,TSS68559,TSS75902,TSS75903,TSS75905,TSS79528,TSS8569	6:30723546-30896794	0.215874335	9.378940316	5.364995796	0.020544838	0.666644688
ENSMUSG00000020423	Btg2	TSS26811	1:134075169-134079120	-0.304930637	5.558502209	5.361382311	0.020587449	0.666644688
ENSMUSG00000044017	Gpr133	TSS46914,TSS46916	5:129096749-129204599	0.448933769	2.856456727	5.353775554	0.020677449	0.666644688
ENSMUSG00000009418	Nav1	TSS68798	1:135434579-135599950	-0.165821156	6.503593521	5.3529734	0.020686963	0.666644688
ENSMUSG00000026509	Capn2	TSS29249	1:182467255-182517495	0.147551164	7.148748983	5.348651739	0.020738301	0.666644688
ENSMUSG00000031548	Sfrp1	TSS26961	8:23411501-23449632	0.239715489	6.39065366	5.34712581	0.020756459	0.666644688
ENSMUSG00000063870	Chd4	TSS25573,TSS272,TSS44529,TSS4920,TSS52909,TSS68785,TSS81253	6:125095980-125130591	0.137992311	9.03435532	5.343533593	0.020799271	0.666644688
ENSMUSG00000014873	Surf2	TSS34530,TSS77243,TSS82596,TSS84062,TSS85568	2:26913382-26933928	0.217572187	4.525405697	5.339488319	0.020847591	0.666644688
ENSMUSG00000007655	Cav1	TSS10372,TSS41628,TSS4367,TSS45917,TSS54373,TSS5479,TSS64055,TSS7211,TSS81703	6:17197750-17385604	0.194126681	9.386161418	5.33770207	0.020868965	0.666644688
ENSMUSG00000006386	Tek	TSS39037,TSS50511,TSS52886,TSS59433	4:94739288-94874976	0.161259669	7.050652103	5.332153231	0.020935505	0.667154878
ENSMUSG00000042985	Upk3b	TSS83742	5:136038495-136045303	0.362086274	4.973014632	5.323615352	0.021038318	0.668081778
ENSMUSG00000056962	Jmjd6	TSS30748,TSS3385,TSS47820,TSS7396,TSS79706,TSS83020,TSS9695	11:116837431-116875635	0.179352794	6.28570594	5.316349328	0.021126227	0.668081778
ENSMUSG00000029148	Nrbp1	TSS1909,TSS23094,TSS32193,TSS32683,TSS37559,TSS37696,TSS69057,TSS73244,TSS78373,TSS825	5:31240674-31251566	0.14338055	6.78991411	5.315943685	0.021131146	0.668081778
ENSMUSG00000069793	Slfn9	TSS36412,TSS4726,TSS58927	11:82979628-82991830	-0.216928573	5.734078472	5.305253524	0.021261205	0.668081778
ENSMUSG00000085603	Gm11346	TSS11326,TSS13245,TSS21026,TSS64473	13:24582188-24733816	-0.49029105	2.186743199	5.304477759	0.021270676	0.668081778
ENSMUSG00000039159	Ube2h	TSS33524,TSS43587,TSS8987,TSS8991	6:30211288-30304539	0.151834213	6.076111764	5.302619629	0.021293377	0.668081778
ENSMUSG00000038346	Zfp384	TSS13199,TSS24542,TSS2628,TSS280,TSS30315,TSS31745,TSS33277,TSS3506,TSS38784,TSS42283,TSS4506,TSS46049,TSS60137,TSS61088,TSS61089,TSS61819	6:125009144-125037870	0.195098128	4.671137427	5.300519478	0.021319065	0.668081778
ENSMUSG00000059810	Rgs3	TSS13220,TSS13461,TSS13863,TSS18450,TSS24410,TSS28318,TSS30801,TSS41201,TSS50285,TSS68482,TSS68911,TSS68981,TSS70432,TSS81993,TSS85253,TSS9467	4:62559846-62703018	0.191580777	6.111951048	5.290570588	0.021441194	0.669772795
ENSMUSG00000054702	Ap1s3	TSS39891,TSS39901,TSS71876	1:79606875-79671972	-0.295069502	4.726147543	5.287862563	0.021474562	0.669772795
ENSMUSG00000003153	Slc2a3	TSS27741,TSS31030,TSS31383,TSS3603,TSS41671,TSS45120,TSS84176,TSS84331	6:122727808-122801640	0.333532832	4.418906786	5.26521677	0.021755713	0.674695718
ENSMUSG00000024963	Dnajc4	TSS41054,TSS42831	19:6987910-6992503	-0.262240594	4.051490933	5.26371105	0.021774542	0.674695718
ENSMUSG00000038205	Prkab2	TSS23739,TSS35687,TSS35688,TSS37946,TSS5298	3:97658192-97674694	0.16195272	5.795301934	5.262809435	0.021785824	0.674695718
ENSMUSG00000030469	Zfp719	TSS52894,TSS75198	7:43579609-43593235	0.233544729	4.157460467	5.249204825	0.021956803	0.678398355
ENSMUSG00000045667	Smtnl2	TSS31785,TSS31786,TSS49504,TSS59534	11:72389163-72411713	0.183669188	6.366788334	5.24092085	0.022061593	0.680043463
ENSMUSG00000097750	AC149055.1	TSS47489	7:30945251-30989720	0.353739637	3.09493194	5.230805566	0.022190253	0.682414931
ENSMUSG00000096687	RP24-170A20.3	TSS19146,TSS34726	10:39890017-39899238	0.282163443	3.650812684	5.2223462	0.022298447	0.684147463
ENSMUSG00000026622	Nek2	TSS11303,TSS21008,TSS63950,TSS7180	1:191821443-191833050	-0.194879487	5.745910144	5.212739269	0.022421981	0.684809629
ENSMUSG00000021144	Mta1	TSS20078,TSS3718,TSS54509,TSS62166,TSS76703	12:113098277-113137206	-0.19710247	5.347437947	5.212594895	0.022423843	0.684809629
ENSMUSG00000027198	Ext2	TSS32645,TSS32655,TSS34456,TSS46115,TSS4623,TSS52846,TSS55006,TSS55014,TSS67602,TSS9766	2:93695630-93822568	0.152225433	5.573340502	5.203301791	0.022544027	0.686889947
ENSMUSG00000049800	Sertad2	TSS18558,TSS18929,TSS58304,TSS73384	11:20543252-20653021	-0.167136571	5.906557462	5.195655433	0.022643415	0.6883285
ENSMUSG00000066392	Nrxn3	TSS19770,TSS26020,TSS26026,TSS39948,TSS44819,TSS55473,TSS63330,TSS69113,TSS7793,TSS80046	12:88722875-90334935	0.529490669	1.781839936	5.184694441	0.022786679	0.689927563
ENSMUSG00000097432	mmu-mir-1900	TSS49846	9:21015959-21039036	0.460212132	1.798098881	5.181582342	0.022827526	0.689927563
ENSMUSG00000024664	Fads3	TSS83479	19:10041547-10059671	-0.142389777	6.681304693	5.179651836	0.022852903	0.689927563
ENSMUSG00000006373	Pgrmc1	TSS52880	X:36598205-36606079	0.19292171	5.782327577	5.172543409	0.022946596	0.691122757
ENSMUSG00000040998	Npnt	TSS25401,TSS49626,TSS75101,TSS83947,TSS9878	3:132881744-132950291	0.62038921	1.776268134	5.163029661	0.023072616	0.691122757
ENSMUSG00000024805	Pcgf5	TSS29503,TSS52869	19:36379066-36456192	-0.192329052	5.382508544	5.158665577	0.023130663	0.691122757
ENSMUSG00000049232	Tigd2	TSS67124	6:59208869-59212033	0.218462395	4.593654654	5.157015494	0.02315265	0.691122757
ENSMUSG00000034799	Unc13a	TSS10877,TSS11716,TSS1856,TSS28446,TSS34081,TSS43697,TSS58579,TSS61312	8:71611023-71671757	0.218882412	4.649100412	5.154979246	0.023179813	0.691122757
ENSMUSG00000026087	Mrpl30	TSS3521,TSS36031,TSS69126,TSS70327	1:37890476-37898535	-0.152233908	6.433874542	5.149498726	0.023253085	0.691122757
ENSMUSG00000073676	Hspe1	TSS41726,TSS59906	1:55077834-55091307	-0.185514174	6.847060183	5.149042832	0.023259191	0.691122757
ENSMUSG00000073940	Hbb-b2	TSS55829	7:103812523-103813996	0.852470886	7.920412401	5.12154731	0.023630537	0.699074988
ENSMUSG00000059602	Syn3	TSS13195,TSS22330,TSS2790,TSS49767,TSS80163	10:86055124-86498896	0.226973756	6.968499823	5.113527564	0.023740004	0.699074988
ENSMUSG00000092397	C130080G10Rik	TSS11362,TSS30119,TSS35374,TSS60981,TSS69569	2:114009600-114068324	-0.155414525	6.966749338	5.113251429	0.023743782	0.699074988
ENSMUSG00000060429	Sntb1	TSS30916,TSS41589,TSS81176	15:55638842-55906949	-0.168435235	5.974482471	5.112565089	0.023753177	0.699074988
ENSMUSG00000039195	1110008P14Rik	TSS51994,TSS79725	2:32308470-32381938	-0.251303522	3.784538185	5.103313384	0.023880186	0.699074988
ENSMUSG00000062590	Armc9	TSS36009,TSS46370,TSS4982,TSS65728,TSS66945,TSS7701,TSS7703,TSS83183,TSS83185,TSS83189	1:86064386-86301375	0.283589869	3.477396063	5.102848266	0.023886589	0.699074988
ENSMUSG00000044734	Serpinb1a	TSS79236	13:32842091-32851185	0.328866818	3.101540496	5.09492569	0.023995942	0.699074988
ENSMUSG00000038217	Tlcd2	TSS15182,TSS80774,TSS84033	11:75461538-75470899	-0.288073716	3.501971515	5.090859681	0.024052266	0.699074988
ENSMUSG00000039323	Igfbp2	TSS37750,TSS41280,TSS63257	1:72824502-72852474	0.968476623	2.06482788	5.090698986	0.024054494	0.699074988
ENSMUSG00000026683	Nuf2	TSS31528,TSS76114	1:169497933-169531464	-0.194169599	5.767452395	5.08030684	0.024199087	0.699074988
ENSMUSG00000023106	Denr	TSS16837,TSS39154,TSS78259,TSS8360	5:123907174-123969895	-0.151776994	5.615277952	5.079544428	0.02420973	0.699074988
ENSMUSG00000007458	M6pr	TSS34088,TSS60594	6:122308719-122317680	0.151199116	6.219757353	5.078649916	0.024222224	0.699074988
ENSMUSG00000069763	Tmem100	TSS43145	11:90030347-90036508	0.398444789	3.45233323	5.077851046	0.024233388	0.699074988
ENSMUSG00000024187	Itfg3	TSS32866,TSS4059,TSS41901,TSS45232,TSS80293	17:26211821-26244223	0.162912911	5.850101349	5.072285945	0.024311303	0.699074988
ENSMUSG00000090564	A430057M04Rik	TSS43969,TSS65211	14:21831268-21856926	-0.471725418	1.674584697	5.071548923	0.024321642	0.699074988
ENSMUSG00000003382	Etv3	TSS23711,TSS23720,TSS24929,TSS27942,TSS36814	3:87525406-87540156	0.179144732	5.378968007	5.06312495	0.024440131	0.699489638
ENSMUSG00000064341	mt-Nd1	TSS47601	MT:2750-3842	-0.181238823	12.40844304	5.062491618	0.024449064	0.699489638
ENSMUSG00000019978	Epb4.1l2	TSS2480,TSS70877	10:25359797-25523519	0.144483008	7.004679103	5.059229407	0.024495127	0.699489638
ENSMUSG00000028710	Atpaf1	TSS16090,TSS25544,TSS3167,TSS3171,TSS41141,TSS68593	4:115784811-115818828	-0.182508956	5.634943523	5.055363035	0.024549838	0.699537837
ENSMUSG00000034936	Arl4d	TSS135	11:101665540-101667832	0.383467805	2.355063988	5.048713591	0.024644228	0.699953947
ENSMUSG00000041189	Chrnb1	TSS13495,TSS4556,TSS51385,TSS63150	11:69784035-69795943	0.399257827	2.152199036	5.046863944	0.024670551	0.699953947
ENSMUSG00000072763	5430403G16Rik	TSS84791	5:109674544-109691041	0.484529722	1.826954731	5.034186872	0.024851751	0.703167475
ENSMUSG00000090066	1110002E22Rik	TSS73115	3:138048760-138081412	-0.207548418	7.899445071	5.029469634	0.024919528	0.703167475
ENSMUSG00000035365	Parpbp	TSS23650,TSS28533,TSS38250	10:88091071-88146941	-0.209753113	4.617237919	5.027789786	0.024943711	0.703167475
ENSMUSG00000071014	Ndufb6	TSS73593,TSS9653	4:40259600-40279421	-0.145111059	6.767944789	5.01483744	0.025130989	0.706936324
ENSMUSG00000020160	Meis1	TSS22373,TSS51444,TSS71170,TSS7187,TSS8875	11:18880429-19018958	-0.164765124	6.335235546	5.010604365	0.025192511	0.707159141
ENSMUSG00000030417	Pdcd5	TSS34162,TSS55417,TSS57623,TSS7604,TSS79866,TSS80460,TSS83104	7:35641981-35647521	-0.167354175	6.098708451	5.001570552	0.025324329	0.70916916
ENSMUSG00000037736	Limch1	TSS12511,TSS29871,TSS40662,TSS40874,TSS40962,TSS52382,TSS53514,TSS61299,TSS61914,TSS64433,TSS78649,TSS84649,TSS85445	5:66745834-67057159	0.165576394	6.279694822	4.998341148	0.025371625	0.70916916
ENSMUSG00000055897	Ppp4r1l-ps	TSS13769,TSS19071,TSS37196,TSS46836,TSS46839,TSS53016,TSS66798,TSS68732,TSS71612	2:173579319-173659640	0.202831726	4.656605725	4.992824553	0.02545263	0.709516513
ENSMUSG00000050410	Tcf19	TSS34319,TSS34322,TSS40960,TSS78992	17:35512733-35516824	-0.256900034	5.485320408	4.990176314	0.025491611	0.709516513
ENSMUSG00000047534	Mis18bp1	TSS23924,TSS45256,TSS55878,TSS56255,TSS62667,TSS75130	12:65132733-65172604	-0.179315326	5.576831533	4.981472865	0.025620162	0.711593264
ENSMUSG00000002885	Cd97	TSS18490,TSS31948,TSS34809,TSS4289,TSS61650,TSS72791,TSS74162	8:83715176-83741326	0.138026494	6.561555294	4.974930546	0.025717236	0.712371778
ENSMUSG00000026939	Tmem141	TSS11046,TSS12290,TSS16456,TSS30374,TSS33580,TSS78884,TSS83981	2:25583017-25631761	-0.32736886	3.197983743	4.972312854	0.025756184	0.712371778
ENSMUSG00000022771	Ppil2	TSS1549,TSS193,TSS28203,TSS3236,TSS37916,TSS50526,TSS50529,TSS69867,TSS74303,TSS83280,TSS84619	16:17069695-17111257	0.146508375	6.209434715	4.959626681	0.025945808	0.71611516
ENSMUSG00000042622	Maff	TSS34320,TSS85549	15:79347540-79359072	0.286600817	3.685612291	4.951958735	0.026061126	0.717617111
ENSMUSG00000038007	Acer2	TSS10545,TSS72572,TSS85273	4:86874395-86934822	0.294872512	6.092726988	4.948784855	0.026109013	0.717617111
ENSMUSG00000019055	Plod1	TSS20547,TSS27845,TSS33705,TSS39778,TSS62100,TSS84338	4:147909752-147936767	0.158621899	6.896644344	4.938638679	0.026262713	0.718857852
ENSMUSG00000020182	Ddc	TSS16908,TSS21554,TSS466,TSS51104,TSS5393,TSS5400,TSS5858,TSS71346,TSS72385,TSS78545	11:11814100-11898144	-0.253661226	7.694955441	4.938611192	0.026263131	0.718857852
ENSMUSG00000054723	Vmac	TSS50941,TSS60157	17:56713931-56717699	0.337748835	2.789204566	4.933881559	0.0263351	0.719335352
ENSMUSG00000074359	Psg23	TSS41421	7:18606342-18616501	-0.434010288	1.846960415	4.922370784	0.026511113	0.722229471
ENSMUSG00000037016	Frem2	TSS14529	3:53513938-53657355	0.190518817	5.987185418	4.917718311	0.026582602	0.722229471
ENSMUSG00000034311	Kif4	TSS18256,TSS27747,TSS44506	X:100622882-100727214	-0.171349869	6.785745298	4.916244813	0.026605285	0.722229471
ENSMUSG00000027276	Jag1	TSS13060,TSS43900	2:137081455-137116644	0.189642232	5.59859016	4.903321538	0.02680509	0.726159246
ENSMUSG00000074140	Zfp319	TSS16819	8:95310565-95331950	0.328329522	3.257957969	4.896474734	0.026911579	0.726669125
ENSMUSG00000060487	Samd5	TSS72040	10:9627258-9675208	-0.367663095	3.248322744	4.894097098	0.026948662	0.726669125
ENSMUSG00000041476	Smpx	TSS15786,TSS57162,TSS64525,TSS6626,TSS69944,TSS75290	X:157698909-157752591	-0.14254621	8.737199778	4.891504895	0.026989151	0.726669125
ENSMUSG00000028573	Fggy	TSS10888,TSS23091,TSS25689,TSS3439,TSS34473,TSS36086,TSS3753,TSS38388,TSS42286,TSS52525,TSS55413,TSS60628,TSS6379,TSS70315,TSS70320,TSS81999,TSS9155	4:95557506-95926939	0.474222013	2.314015312	4.885486789	0.027083396	0.727721482
ENSMUSG00000086806	Gm13054	TSS37697	4:148000721-148004014	0.709327639	7.902964989	4.873238653	0.027276264	0.730034672
ENSMUSG00000031155	Pim2	TSS14958,TSS55415,TSS57440	X:7878261-7883432	0.301566835	2.969436861	4.872360998	0.027290139	0.730034672
ENSMUSG00000021485	Mxd3	TSS14485,TSS26102,TSS8656	13:55322054-55329758	-0.232219113	5.070658508	4.869495511	0.027335491	0.730034672
ENSMUSG00000034248	Slc25a37	TSS9145	14:69241850-69285103	0.482705253	5.472158033	4.862834732	0.027441213	0.731377627
ENSMUSG00000019883	Echdc1	TSS17180,TSS20672,TSS22661,TSS79941	10:29313165-29362442	-0.308153045	3.14343049	4.858124773	0.027516228	0.731898384
ENSMUSG00000081887	Gm12097	TSS22003	11:30505990-30649587	-0.525458136	1.560404389	4.846979625	0.027694586	0.735160321
ENSMUSG00000024074	Crim1	TSS52912	17:78200247-78376592	0.188495808	5.35659203	4.8413457	0.027785205	0.73608475
ENSMUSG00000091405	Hist2h4	TSS25749	3:96261703-96263311	-0.497647818	3.853704697	4.834388722	0.027897529	0.73674267
ENSMUSG00000020431	Adcy1	TSS63724,TSS85606	11:7063488-7178506	0.732891235	3.235137695	4.832893855	0.027921726	0.73674267
ENSMUSG00000032673	Prorsd1	TSS75210,TSS84314	11:29511756-29515033	0.272787179	3.350932745	4.825532954	0.028041195	0.73706147
ENSMUSG00000057606	Colq	TSS65276,TSS67347,TSS68285,TSS77353,TSS79932	14:31523081-31668579	-0.351223516	3.79180079	4.820414374	0.028124583	0.73706147
ENSMUSG00000036777	Anln	TSS18161	9:22331213-22389206	-0.144987124	7.764064979	4.815939939	0.028197689	0.73706147
ENSMUSG00000029922	Mkrn1	TSS28348,TSS55406,TSS56632,TSS6134,TSS67619,TSS79377,TSS81964,TSS84216	6:39397803-39421294	0.261685497	5.2384999	4.814054283	0.028228557	0.73706147
ENSMUSG00000026385	Dbi	TSS27974,TSS31498,TSS48315,TSS53585,TSS72152,TSS81153,TSS84605	1:120113279-120121078	-0.138801991	6.866071898	4.809402852	0.028304852	0.73706147
ENSMUSG00000026784	Pdss1	TSS3580,TSS36510,TSS40063,TSS42134,TSS49245,TSS55822	2:22895320-23040241	-0.213711044	5.051391298	4.803680409	0.028399008	0.73706147
ENSMUSG00000030064	Frmd4b	TSS10500,TSS11293,TSS17047,TSS35957,TSS41436,TSS44583,TSS48320,TSS48874,TSS56492,TSS56493,TSS64778,TSS78871,TSS83984	6:97286866-97617541	0.199994172	5.262480987	4.800716314	0.028447907	0.73706147
ENSMUSG00000024186	Rgs11	TSS14554,TSS18432,TSS18515,TSS38924,TSS39041,TSS50422,TSS68685,TSS75723,TSS80574,TSS82316,TSS82324	17:26195998-26211324	0.385151633	2.326627289	4.799745377	0.028463943	0.73706147
ENSMUSG00000050188	Lsm10	TSS10334,TSS55030,TSS64710	4:126096622-126098584	0.282217993	3.547838864	4.796188188	0.028522777	0.73706147
ENSMUSG00000032548	Slco2a1	TSS85664	9:103008488-103087849	0.34074189	3.724108928	4.792399216	0.028585583	0.73706147
ENSMUSG00000023055	Calcoco1	TSS1438,TSS23982,TSS37820,TSS77493	15:102706778-102722178	0.28613683	6.00751162	4.790591446	0.028615599	0.73706147
ENSMUSG00000034868	Myl12b	TSS35233,TSS35755,TSS81040	17:70853766-71475343	0.203866422	5.212901716	4.783991191	0.028725469	0.73706147
ENSMUSG00000033948	Zswim5	TSS2839	4:116877375-116989264	0.328557479	3.04950909	4.778707489	0.02881374	0.73706147
ENSMUSG00000039458	Mtmr12	TSS19611,TSS2255,TSS38948,TSS54021,TSS80409	15:12205027-12272240	0.18481066	5.059669139	4.776368374	0.028852908	0.73706147
ENSMUSG00000000884	Gnb1l	TSS13789,TSS13797,TSS33114,TSS35769,TSS37381,TSS41839,TSS42742,TSS68147,TSS68149	16:18498767-18566679	-0.474233295	2.103775061	4.774149726	0.02889011	0.73706147
ENSMUSG00000023186	Vwa5a	TSS16919,TSS21071,TSS45634,TSS50222,TSS51404,TSS77344,TSS82477	9:38718267-38743337	0.166664627	6.171631188	4.76370543	0.02906591	0.73706147
ENSMUSG00000024169	Ift140	TSS11842,TSS20111,TSS30122,TSS37494,TSS49797,TSS53761,TSS54527,TSS71767	17:25016090-25099495	0.203913658	4.76107589	4.762579236	0.029084933	0.73706147
ENSMUSG00000097749	AC119880.1	TSS16627,TSS59959	7:98121558-98185597	-0.527095909	1.527519266	4.760262012	0.029124114	0.73706147
ENSMUSG00000037152	Ndufc1	TSS121,TSS28472,TSS77095	3:51404676-51408988	-0.132570115	6.899809321	4.756589615	0.029186323	0.73706147
ENSMUSG00000032415	Ube2cbp	TSS23435,TSS31697,TSS65936	9:86307233-86464950	-0.469480526	1.645146284	4.752573018	0.02925452	0.73706147
ENSMUSG00000096472	Cdkn2d	TSS44750	9:21288462-21291209	-0.17189906	5.482051394	4.750725657	0.029285942	0.73706147
ENSMUSG00000078937	Cpt1b	TSS15460,TSS67122,TSS67261,TSS7857	15:89416404-89430868	0.149908253	9.153016484	4.750442525	0.029290761	0.73706147
ENSMUSG00000097732	AC122821.2	TSS20905	17:23790703-23794241	-0.536428239	1.234474454	4.743186705	0.029414537	0.73706147
ENSMUSG00000027774	Gfm1	TSS41143,TSS58263,TSS67317	3:67430095-67476529	-0.130790916	7.850462363	4.741535362	0.029442784	0.73706147
ENSMUSG00000021573	Tppp	TSS1822,TSS22166,TSS33721,TSS77770	13:74009406-74035753	0.218520687	5.495536592	4.741103808	0.02945017	0.73706147
ENSMUSG00000023051	Tarbp2	TSS10190,TSS16375,TSS22322,TSS22439,TSS29602,TSS37295,TSS40411,TSS53894,TSS61469,TSS68187,TSS72382,TSS72697,TSS74224,TSS80725	15:102518191-102523676	-0.173205345	5.501280538	4.73812297	0.029501242	0.73706147
ENSMUSG00000073968	Trim68	TSS54858	7:102677579-102687326	0.259054873	3.600977511	4.73733678	0.029514728	0.73706147
ENSMUSG00000033952	Aspm	TSS46562,TSS8078,TSS82623	1:139454772-139494090	-0.139322211	7.437899427	4.731483408	0.029615332	0.73706147
ENSMUSG00000049907	Rasl11b	TSS7681	5:74195295-74199478	-0.194582607	5.289234902	4.729924882	0.02964218	0.73706147
ENSMUSG00000026471	Mr1	TSS52455	1:155127877-155146780	0.261974519	3.770170794	4.729047801	0.0296573	0.73706147
ENSMUSG00000056698	Elmod3	TSS1653,TSS4675,TSS58236,TSS80471,TSS8160,TSS82374	6:72565921-72598413	0.321561556	3.522286239	4.728560447	0.029665705	0.73706147
ENSMUSG00000028076	Cd1d1	TSS24569,TSS37566,TSS45109,TSS52185,TSS61925	3:86995833-86999441	0.251280225	4.275708784	4.719909738	0.029815308	0.739386016
ENSMUSG00000049191	Rgag4	TSS18313,TSS49047,TSS72975	X:101849384-102092055	0.313391465	2.669724861	4.707723976	0.030027381	0.743248101
ENSMUSG00000092215	Gm20419	TSS3475	17:35480138-35480728	0.273110506	4.122850619	4.698130871	0.030195439	0.74600828
ENSMUSG00000033342	4833424O15Rik	TSS19259,TSS51361	3:117575226-117689507	0.520750042	1.476673564	4.689777898	0.030342569	0.746913625
ENSMUSG00000048376	F2r	TSS7225	13:95601803-95618459	0.131931486	7.2570329	4.688640959	0.030362653	0.746913625
ENSMUSG00000064080	Fbln2	TSS36549,TSS37305,TSS62602,TSS66589,TSS68523,TSS68929,TSS82538	6:91212454-91272540	0.22799268	7.685421905	4.685291446	0.030421903	0.746913625
ENSMUSG00000028059	Arhgef2	TSS17397,TSS1747,TSS21061,TSS21833,TSS22937,TSS24218,TSS24312,TSS24850,TSS28677,TSS30771,TSS33713,TSS35085,TSS36098,TSS43574,TSS44711,TSS4656,TSS4965,TSS5212,TSS53793,TSS58831,TSS60782,TSS68154,TSS68403,TSS69413,TSS71723,TSS76056,TSS79086,TSS82913,TSS83062,TSS84014	3:88607453-88648052	0.147092227	6.85333168	4.678072585	0.030550007	0.746913625
ENSMUSG00000021094	Dhrs7	TSS36218	12:72650355-72664828	0.208834258	5.239242987	4.67624176	0.030582586	0.746913625
ENSMUSG00000070995	Gm6313	TSS19498,TSS23042	6:148606785-148614309	-0.388167272	2.033444766	4.674140338	0.030620024	0.746913625
ENSMUSG00000031684	Slc10a7	TSS46097	8:78509334-78734005	0.202251515	4.243226742	4.671616317	0.030665055	0.746913625
ENSMUSG00000039908	Slc26a11	TSS21264,TSS31429,TSS53211,TSS69014	11:119355556-119381079	0.303686949	2.840059675	4.6682961	0.030724395	0.746913625
ENSMUSG00000031931	Ankrd49	TSS18350	9:14780208-14782964	0.223594797	4.276641051	4.667334003	0.030741613	0.746913625
ENSMUSG00000037960	1110007C09Rik	TSS75346	13:49202950-49216026	-0.204167527	4.845339119	4.65280301	0.031002883	0.751876902
ENSMUSG00000059540	Tcea2	TSS2048,TSS36728,TSS64757,TSS66970,TSS69045,TSS76365,TSS8086	2:181680309-181688071	0.271619278	3.356256889	4.642665368	0.03118653	0.754942923
ENSMUSG00000022822	Abcc5	TSS19751,TSS30466,TSS3384,TSS34026,TSS47912,TSS49940,TSS50284,TSS53192,TSS59435,TSS78003,TSS78711,TSS81820	16:20331302-20426394	0.141064939	6.964800804	4.633804124	0.031347984	0.755477881
ENSMUSG00000027247	Arhgap1	TSS33765,TSS45840,TSS48306,TSS61862,TSS63298,TSS70708,TSS7318,TSS80467	2:91649859-91672326	0.168278475	6.690714469	4.632859399	0.031365249	0.755477881
ENSMUSG00000067455	Hist1h4j	TSS20864	13:21735061-21735837	-0.647240519	2.740543083	4.632029676	0.03138042	0.755477881
ENSMUSG00000022799	Arhgap31	TSS13630,TSS70347,TSS70348	16:38598339-38713274	0.150837711	8.294764744	4.611437082	0.031759407	0.757392116
ENSMUSG00000022792	Yars2	TSS3999,TSS42930,TSS49054,TSS58239,TSS64517,TSS73267	16:16302964-16309640	-0.202290478	4.893656924	4.60939267	0.031797293	0.757392116
ENSMUSG00000024949	Sf1	TSS10142,TSS13633,TSS22529,TSS23584,TSS28363,TSS31102,TSS33589,TSS40205,TSS44540,TSS65275,TSS67331,TSS68935,TSS8111	19:6341134-6378030	-0.139084041	6.392049608	4.606242821	0.031855755	0.757392116
ENSMUSG00000056492	Gpr116	TSS463	17:43389465-43459557	0.200500045	7.725174678	4.604034854	0.031896803	0.757392116
ENSMUSG00000022964	Tmem50b	TSS27685,TSS85312	16:91574502-91597800	-0.195365902	5.359514745	4.602579147	0.031923896	0.757392116
ENSMUSG00000021520	Uqcrb	TSS40234,TSS9586	13:66900616-66998401	-0.172974503	7.67361883	4.599980847	0.031972313	0.757392116
ENSMUSG00000090210	Itga10	TSS23539,TSS56518	3:96635375-96664519	-0.44380708	1.782558148	4.599584991	0.031979697	0.757392116
ENSMUSG00000037119	D15Ertd621e	TSS16853	15:58415467-58457801	0.155567381	6.26204918	4.597342014	0.032021565	0.757392116
ENSMUSG00000092837	RNaseP_nuc	TSS62666	14:50807448-50807767	-0.51894812	9.673910573	4.596138546	0.032044053	0.757392116
ENSMUSG00000039377	Hlx	TSS65951,TSS82043	1:184727139-184732619	-0.554565129	2.388778939	4.595985108	0.032046921	0.757392116
ENSMUSG00000001983	Taco1	TSS74238	11:106065076-106073612	-0.196522619	4.617640122	4.59084909	0.032143087	0.757392116
ENSMUSG00000046223	Plaur	TSS29030	7:24462499-24475873	0.384294336	2.212955968	4.587932848	0.032197824	0.757392116
ENSMUSG00000026790	Odf2	TSS10083,TSS13758,TSS18792,TSS18927,TSS20826,TSS21352,TSS23748,TSS26555,TSS27647,TSS27904,TSS27979,TSS30958,TSS30966,TSS33894,TSS37512,TSS37641,TSS39482,TSS42633,TSS48518,TSS62483,TSS72896,TSS79773,TSS79822,TSS80702	2:29889220-29931746	0.128214151	6.554970335	4.584674511	0.032259098	0.757392116
ENSMUSG00000029648	Flt1	TSS48200,TSS55501,TSS5615,TSS59455	5:147561603-147726011	0.207412568	7.080999282	4.582267527	0.032304439	0.757392116
ENSMUSG00000029094	Afap1	TSS56245,TSS76895,TSS80762	5:35893318-36003923	-0.150068816	6.11942655	4.581386027	0.032321061	0.757392116
ENSMUSG00000021134	Srsf5	TSS12760,TSS222,TSS227,TSS26403,TSS44792,TSS62869,TSS73653,TSS76700,TSS83262	12:80945503-80950507	0.134856419	8.266967516	4.568933147	0.032556835	0.760707855
ENSMUSG00000022551	Cyc1	TSS29606	15:76343522-76345934	-0.143046323	9.162413229	4.567826295	0.032577878	0.760707855
ENSMUSG00000027274	Mkks	TSS27643,TSS49901,TSS76381	2:136873779-137071950	-0.145567859	6.013590819	4.559335375	0.032739776	0.763137577
ENSMUSG00000020263	Appl2	TSS17484,TSS20332,TSS20650,TSS20800,TSS22784,TSS24418,TSS24526,TSS24529,TSS31923,TSS32002,TSS35281,TSS41841,TSS42225,TSS44611	10:83600032-83648738	0.192574986	6.482048234	4.553155048	0.032858146	0.764228854
ENSMUSG00000051107	Gm15440	TSS61520	13:51685528-51701041	0.346251401	2.593780694	4.550847985	0.032902447	0.764228854
ENSMUSG00000021281	Tnfaip2	TSS18347,TSS23907,TSS28143,TSS39933,TSS45547,TSS46816,TSS61775,TSS71857,TSS763,TSS78777	12:111442468-111455018	0.356508778	3.331424694	4.538813753	0.033134546	0.767383873
ENSMUSG00000035778	Ggta1	TSS22813,TSS28856,TSS36445,TSS56879,TSS73121,TSS79108,TSS79432,TSS87	2:35400178-35463231	0.15201094	6.035453023	4.53492286	0.033209954	0.767383873
ENSMUSG00000064350	mt-Ty	TSS63930	MT:5259-5326	0.264694036	7.580524108	4.534281213	0.033222406	0.767383873
ENSMUSG00000024989	Cep55	TSS19659,TSS30583,TSS3570	19:38055024-38074425	-0.155575033	5.315648574	4.52906307	0.033323857	0.767383873
ENSMUSG00000022856	Tmem41a	TSS81234	16:21934326-21947552	-0.229359729	4.084667797	4.528793308	0.033329111	0.767383873
ENSMUSG00000090077	Lime1	TSS16869,TSS18634,TSS34639,TSS43211,TSS48549	2:181357689-181383628	-0.269697443	3.963072438	4.524864576	0.033405719	0.767807762
ENSMUSG00000045180	Shroom2	TSS21373,TSS21375,TSS35872,TSS55912,TSS58403,TSS5868	X:152609508-152769465	0.181850374	5.786870558	4.517660933	0.033546665	0.769010107
ENSMUSG00000044551	9930012K11Rik	TSS15076,TSS29730,TSS33308,TSS429	14:70154404-70159502	0.410244261	1.948027545	4.516236496	0.033574609	0.769010107
ENSMUSG00000055493	Epm2a	TSS26684,TSS83810	10:11343403-11459644	0.210646676	4.347778415	4.507864423	0.033739341	0.769230559
ENSMUSG00000025494	Sigirr	TSS37995	7:141091174-141100546	0.451369321	1.718027928	4.504025046	0.033815168	0.769230559
ENSMUSG00000006494	Pdk1	TSS22948,TSS24367,TSS24745,TSS47612,TSS48624,TSS58417,TSS60372,TSS64781	2:71873223-71903858	0.167109268	9.064105401	4.501785642	0.033859478	0.769230559
ENSMUSG00000040836	Gpr161	TSS54008,TSS57282	1:165301862-165322930	0.336650218	2.875419888	4.501603964	0.033863076	0.769230559
ENSMUSG00000023972	Ptk7	TSS20876	17:46442447-46831413	0.237025499	6.00263202	4.499811093	0.033898598	0.769230559
ENSMUSG00000021567	Nkd2	TSS1307,TSS65209	13:73818533-73847631	0.308563351	3.455152458	4.498022736	0.03393407	0.769230559
ENSMUSG00000026238	Ptma	TSS27953	1:86526735-86530698	0.163797053	7.727692278	4.488492744	0.034123751	0.769754944
ENSMUSG00000030470	Csrp3	TSS38096,TSS57035	7:48830397-48848051	-0.161192389	9.841841201	4.48787621	0.03413606	0.769754944
ENSMUSG00000071650	Ganab	TSS22999	19:8898089-8916663	0.12984065	7.358045779	4.485396907	0.034185608	0.769754944
ENSMUSG00000096351	Samd11	TSS22916	4:156236009-156255338	-0.281200485	3.516001775	4.485148011	0.034190586	0.769754944
ENSMUSG00000027016	Zfp385b	TSS28013,TSS39565,TSS40047,TSS45317,TSS45645,TSS49474,TSS4974,TSS55364,TSS61973,TSS61977	2:77410633-77819639	-0.448272787	1.893787434	4.481735383	0.034258918	0.769979397
ENSMUSG00000016252	Atp5e	TSS15737,TSS3173,TSS57351	2:174461071-174464105	-0.143363849	7.612951211	4.477118686	0.034351587	0.770109237
ENSMUSG00000050097	Ces2b	TSS76366,TSS77361	8:104831571-104840093	-0.381075909	3.430425184	4.475634208	0.03438144	0.770109237
ENSMUSG00000036718	Micall2	TSS21639,TSS2515,TSS27202,TSS5491	5:139706692-139736336	-0.474309093	1.613272082	4.471440172	0.034465929	0.770147407
ENSMUSG00000028463	Car9	TSS32300,TSS59571,TSS59898,TSS62245,TSS73664,TSS7740,TSS83524	4:43504427-43513729	0.468955841	1.426171728	4.469757131	0.034499895	0.770147407
ENSMUSG00000020091	Eif4ebp2	TSS15894,TSS25329	10:61432496-61452669	-0.227219581	4.056188459	4.455185383	0.034795439	0.775432821
ENSMUSG00000027456	Sdcbp2	TSS43104	2:151572621-151590005	0.51115059	1.203148861	4.44027907	0.035100509	0.779052688
ENSMUSG00000010205	Raver1	TSS43814	9:21074167-21128393	-0.23821158	5.043262321	4.440122658	0.035103725	0.779052688
ENSMUSG00000032913	Lrig2	TSS14881	3:104453983-104511856	-0.156776413	5.852836201	4.437880826	0.035149852	0.779052688
ENSMUSG00000023015	Racgap1	TSS27523,TSS28498,TSS32436,TSS50925,TSS59996,TSS60743,TSS64480,TSS64483,TSS6599,TSS72760,TSS8261	15:99620495-99651656	-0.148805818	7.276017875	4.435734527	0.035194073	0.779052688
ENSMUSG00000007721	Ccdc124	TSS49010	8:70868226-70873490	-0.304630486	4.342511334	4.431836285	0.035274538	0.779525926
ENSMUSG00000029108	Pcdh7	TSS47164	5:57718020-58129351	-0.151460895	8.20484328	4.419825815	0.035523663	0.782518051
ENSMUSG00000001642	Akr1b3	TSS46560,TSS47671,TSS62236,TSS70152,TSS77258	6:34290264-34324249	-0.158545403	5.817486801	4.419590512	0.035528562	0.782518051
ENSMUSG00000083907	Plk-ps1	TSS34677	5:35554183-35555971	0.457592246	1.552143929	4.409931793	0.03573027	0.785649081
ENSMUSG00000063320	1190007I07Rik	TSS54419,TSS63359	10:82619850-82623196	-0.366148954	2.2362449	4.406894834	0.035793939	0.785739506
ENSMUSG00000027428	Rbbp9	TSS2573,TSS81390	2:144542264-144550869	0.203686389	5.058080643	4.401528848	0.035906728	0.786906075
ENSMUSG00000023328	Ache	TSS2257,TSS23466,TSS28803,TSS37211,TSS37212,TSS59393,TSS79849	5:137287518-137294466	0.601915645	1.039075912	4.391410155	0.036120426	0.790276591
ENSMUSG00000024043	Arhgap28	TSS12817,TSS13446,TSS36505,TSS48335,TSS55264	17:67842712-68004120	0.201589528	4.749462548	4.384310669	0.036271156	0.792260534
ENSMUSG00000026655	Fam107b	TSS33865,TSS52837,TSS5423,TSS63515,TSS79267,TSS79530,TSS85085	2:3613757-3782142	0.16741554	5.419345535	4.370640775	0.03656324	0.79560468
ENSMUSG00000025283	Sat1	TSS14335,TSS15463,TSS24673,TSS25187,TSS34669,TSS68644	X:155213131-155216449	0.164596171	5.222825152	4.364393879	0.036697536	0.79560468
ENSMUSG00000031262	Cenpi	TSS25885,TSS34687,TSS39561,TSS72428,TSS82315	X:134308083-134362639	-0.185552871	5.4447883	4.360944457	0.036771913	0.79560468
ENSMUSG00000056310	Tyw1	TSS38786,TSS393,TSS72114	5:130255618-130341563	0.203443981	4.203663389	4.35858453	0.036822889	0.79560468
ENSMUSG00000068101	Cenpm	TSS29132	15:82233778-82244747	-0.42275269	3.007000555	4.353218357	0.036939078	0.79560468
ENSMUSG00000018909	Arrb1	TSS21882,TSS29094,TSS33319,TSS43115,TSS53780,TSS53782,TSS6442,TSS73486,TSS78990	7:99535465-99606771	0.173421766	6.346901968	4.351241703	0.036981973	0.79560468
ENSMUSG00000028116	Myoz2	TSS40898,TSS45096,TSS72857,TSS73837	3:123006205-123034990	-0.192164329	8.27569891	4.350548081	0.036997038	0.79560468
ENSMUSG00000024486	Hbegf	TSS65677	18:36504928-36515805	-0.235007882	4.039301098	4.349609961	0.037017423	0.79560468
ENSMUSG00000097593	AC145610.1	TSS62540	18:80294543-80364254	-0.557629856	1.725431295	4.348765	0.037035794	0.79560468
ENSMUSG00000041959	S100a10	TSS15357,TSS49655,TSS66126	3:93555079-93564643	0.139071676	6.021153626	4.346817155	0.03707818	0.79560468
ENSMUSG00000003418	St8sia6	TSS32494,TSS66566	2:13651019-13793808	0.399949238	2.905160599	4.344493994	0.037128799	0.79560468
ENSMUSG00000030045	Mrpl19	TSS33829,TSS63104,TSS75325	6:81923668-81965958	-0.178045948	5.788329871	4.343617374	0.037147918	0.79560468
ENSMUSG00000027883	Gpsm2	TSS51884,TSS535,TSS71075,TSS78164	3:108653912-108722187	-0.193864542	5.160169968	4.340512089	0.037215728	0.795765163
ENSMUSG00000032135	Mcam	TSS19237,TSS50950,TSS51903,TSS65993,TSS7022	9:44123767-44142727	0.133756647	8.344464708	4.331773106	0.037407259	0.798385392
ENSMUSG00000061482	Hist1h4d	TSS32625	13:23581597-23581990	-0.560171998	5.197303004	4.326529846	0.03752267	0.798385392
ENSMUSG00000041164	Zmiz2	TSS29753,TSS5591,TSS66391,TSS74817,TSS77830,TSS83011	11:6389073-6406158	-0.28043402	4.099758813	4.324971175	0.03755705	0.798385392
ENSMUSG00000005656	Snx6	TSS50904	12:54746348-54795703	0.12927968	6.165280847	4.321778517	0.037627575	0.798385392
ENSMUSG00000005481	Ddx39	TSS55323,TSS72782,TSS74685,TSS81914,TSS8858	8:83715176-83741326	-0.159704761	6.259953484	4.314612684	0.037786372	0.798385392
ENSMUSG00000024754	Tmem2	TSS28818	19:21778341-21858327	0.157039204	7.748811302	4.308763746	0.037916506	0.798385392
ENSMUSG00000022351	Sqle	TSS42212,TSS50395,TSS50435,TSS54850	15:59315076-59331192	-0.232262205	5.028352043	4.307365663	0.037947682	0.798385392
ENSMUSG00000067279	Ppp1r3c	TSS33657	19:36731736-36736653	0.205979752	8.222635633	4.304597115	0.038009497	0.798385392
ENSMUSG00000026971	Itgb6	TSS11541,TSS2343,TSS3792,TSS43856,TSS46945,TSS48125,TSS78812,TSS85838	2:60598291-60722643	-0.596222093	1.198627201	4.302725384	0.038051348	0.798385392
ENSMUSG00000024960	Plcb3	TSS5280	19:6953713-6969759	0.188901934	5.016878601	4.297126691	0.038176821	0.798385392
ENSMUSG00000015709	Arnt2	TSS44591	7:84246280-84409959	0.561090158	1.970801298	4.296301876	0.038195343	0.798385392
ENSMUSG00000025144	Stra13	TSS56155,TSS56162,TSS69923	11:120710941-120713738	-0.27499712	3.674885695	4.293766848	0.038252327	0.798385392
ENSMUSG00000046699	Slitrk4	TSS36424,TSS54132,TSS61774	X:64264884-64276996	-0.187740582	4.715419899	4.290609537	0.038323424	0.798385392
ENSMUSG00000024067	Dpy30	TSS35757,TSS5019	17:74299473-74323944	-0.175917509	5.115018427	4.28672494	0.038411088	0.798385392
ENSMUSG00000022503	Nubp1	TSS12066,TSS22808,TSS58814,TSS76999,TSS77000,TSS84371	16:10411947-10447362	-0.197076691	4.441155643	4.285976075	0.038428012	0.798385392
ENSMUSG00000054006	D630008O14Rik	TSS13594	1:106538177-106714274	-0.44111908	1.887548833	4.285778644	0.038432475	0.798385392
ENSMUSG00000022422	Dscc1	TSS26650,TSS7262,TSS7372	15:55076098-55090491	-0.338997138	2.699280005	4.281314582	0.038533535	0.798385392
ENSMUSG00000026956	Uap1l1	TSS21902,TSS23594,TSS34454,TSS34846,TSS44279,TSS575	2:25359888-25365682	0.290502303	3.340912069	4.280985902	0.038540987	0.798385392
ENSMUSG00000031078	Cttn	TSS15416,TSS26612,TSS29882,TSS41438,TSS47003,TSS57316,TSS5748	7:144435732-144471009	0.127279037	7.36844601	4.280672364	0.038548097	0.798385392
ENSMUSG00000018750	Zbtb4	TSS2467,TSS26790,TSS49180,TSS52168,TSS53309,TSS65519,TSS81075	11:69765911-69784023	0.156288686	5.735187327	4.280650793	0.038548586	0.798385392
ENSMUSG00000056209	Npm3	TSS13160,TSS83721	19:45747733-45783520	-0.219331583	3.917834558	4.272067463	0.038743764	0.801170019
ENSMUSG00000029430	Ran	TSS17388,TSS31265,TSS31961	5:129020068-129024323	-0.164025479	7.790263315	4.268240695	0.038831115	0.80171971
ENSMUSG00000020873	Slc35b1	TSS12562,TSS18459,TSS21285,TSS39039,TSS84774	11:95384691-95391776	-0.159370163	5.368856635	4.250249194	0.039244572	0.807994241
ENSMUSG00000034035	Ccdc17	TSS56174,TSS57648,TSS60723,TSS66911,TSS75657	4:116557657-116600266	0.540258816	1.295799019	4.248371209	0.039287994	0.807994241
ENSMUSG00000037278	Tmem97	TSS63446	11:78541816-78550777	-0.209774448	4.654356702	4.247042261	0.039318753	0.807994241
ENSMUSG00000030691	Fchsd2	TSS12865,TSS22824,TSS31480,TSS31481,TSS37701,TSS43491,TSS46138	7:101108774-101284405	-0.208684351	5.268756551	4.240434675	0.03947206	0.809035321
ENSMUSG00000040811	Eml2	TSS20428,TSS23948,TSS39580,TSS46209,TSS48100,TSS55892,TSS5889,TSS71045	7:19176420-19206482	0.187789006	5.709626726	4.236287858	0.039568593	0.809035321
ENSMUSG00000017716	Birc5	TSS19520,TSS74644	11:117849250-117855743	-0.146195493	5.999207589	4.235621554	0.039584127	0.809035321
ENSMUSG00000026887	Mrrf	TSS12320,TSS31842,TSS7427	2:36116078-36190647	-0.172727521	5.629850216	4.234310718	0.039614706	0.809035321
ENSMUSG00000038695	Josd2	TSS21869,TSS29519,TSS329,TSS34154,TSS34722,TSS41683,TSS53101,TSS54312,TSS55497,TSS60171,TSS60178,TSS74007,TSS74786,TSS7844,TSS80503,TSS84646	7:44467979-44471652	-0.262004527	5.667877022	4.230646885	0.039700307	0.809476628
ENSMUSG00000022617	Chkb	TSS18740,TSS29926,TSS32298,TSS41496,TSS50515,TSS60190,TSS63038,TSS76674,TSS79429,TSS9919	15:89416404-89430868	0.211336321	5.518902402	4.228138329	0.039759028	0.809476628
ENSMUSG00000048720	Tbc1d12	TSS55081	19:38836578-38919923	0.214716198	4.018103748	4.216629322	0.040029605	0.813729705
ENSMUSG00000039782	Cpeb2	TSS24590,TSS47260,TSS65019	5:43233462-43289724	-0.250279716	5.243254584	4.213482714	0.040103918	0.81375369
ENSMUSG00000064357	mt-Atp6	TSS11445	MT:7765-9390	-0.197945266	12.66745071	4.211359361	0.040154146	0.81375369
ENSMUSG00000035868	3110052M02Rik	TSS3089	17:21657581-21662540	0.367822958	2.16428117	4.195438082	0.040532879	0.820169137
ENSMUSG00000037257	Aagab	TSS43946	9:63602654-63641889	0.166053588	5.654198325	4.189370555	0.040678198	0.821849107
ENSMUSG00000060128	Gm10075	TSS57145	1:19063298-19166346	-0.233652849	4.405478797	4.183807934	0.040811905	0.822126895
ENSMUSG00000035064	Eef2k	TSS10566,TSS1948,TSS29775,TSS38765,TSS50897,TSS61794,TSS70129,TSS73927	7:120842830-120907219	0.128703188	6.291701355	4.18109546	0.040877271	0.822126895
ENSMUSG00000078584	AU022252	TSS1972,TSS20043,TSS51969,TSS75457	4:119203569-119232712	0.133500152	5.804536146	4.180047213	0.040902561	0.822126895
ENSMUSG00000093594	Gm20707	TSS25833	4:147753973-147809840	-0.405367514	1.782098096	4.176810893	0.040980746	0.822126895
ENSMUSG00000021061	Spnb1	TSS12976,TSS56086,TSS81242	12:76580487-76710547	0.146671245	7.663358476	4.171511918	0.0411091	0.822126895
ENSMUSG00000041769	Ppp2r2d	TSS11201,TSS25675,TSS42326,TSS50433,TSS51576,TSS54903,TSS54946,TSS57100,TSS78731	7:138835822-138883057	-0.14812814	5.541347529	4.171226991	0.041116014	0.822126895
ENSMUSG00000025742	Prps2	TSS1958,TSS3098	X:167346321-167382749	0.142363813	6.56375616	4.164764456	0.041273151	0.822126895
ENSMUSG00000037465	Klf10	TSS75833	15:38294412-38300707	0.209765581	5.002168037	4.16413301	0.041288539	0.822126895
ENSMUSG00000097805	AC100734.1	TSS22267	15:42424726-42704616	0.603795893	1.359521618	4.163595926	0.041301632	0.822126895
ENSMUSG00000080727	C920021L13Rik	TSS61813,TSS81174,TSS81175	3:95871521-95892005	0.383334567	2.108465931	4.160601389	0.041374711	0.822126895
ENSMUSG00000027187	Cat	TSS40709,TSS65774	2:103453848-103485160	0.13220733	6.794511154	4.160490634	0.041377417	0.822126895
ENSMUSG00000022364	Wdr67	TSS150,TSS28814,TSS34548,TSS40741,TSS54446,TSS64185,TSS64189	15:57912198-57970067	-0.193695284	5.029212196	4.14968876	0.041642177	0.826143228
ENSMUSG00000045594	Glb1	TSS66151	9:114401075-114474376	0.197570245	5.45523424	4.140828024	0.041860688	0.829231324
ENSMUSG00000003949	Hlf	TSS29366,TSS30369,TSS36380,TSS37554,TSS47543,TSS4821	11:90336535-90390895	-0.268254777	4.063756419	4.137658235	0.04193915	0.82954003
ENSMUSG00000022949	Clic6	TSS18843,TSS49917	16:92478742-92541243	0.40714343	2.046045941	4.132164878	0.042075492	0.830020382
ENSMUSG00000037725	Ckap2	TSS40573	8:22168151-22185819	-0.153520451	5.839729102	4.131611096	0.042089262	0.830020382
ENSMUSG00000058145	Adamts17	TSS19792,TSS3458,TSS3886,TSS55999,TSS71511,TSS84422	7:66839734-67152625	0.296439658	3.485562337	4.128992517	0.04215444	0.83006497
ENSMUSG00000047786	Lix1	TSS17213,TSS79981	17:17402671-17459387	0.337756736	2.785981969	4.122484911	0.042316878	0.831149255
ENSMUSG00000033577	Myo6	TSS14209,TSS14743,TSS15758,TSS1611,TSS22187,TSS36794,TSS58028,TSS6790,TSS75343,TSS84069	9:80165030-80311729	0.178400931	5.402270246	4.117580227	0.04243974	0.831149255
ENSMUSG00000027204	Fbn1	TSS66121,TSS66637,TSS7883	2:125300593-125507993	0.170740747	9.05448245	4.11327597	0.04254787	0.831149255
ENSMUSG00000064181	Rab3ip	TSS46322	10:116905783-116950380	-0.136236001	6.491685026	4.111515693	0.042592175	0.831149255
ENSMUSG00000026024	Als2	TSS15875,TSS17884,TSS68388	1:59100593-59237231	0.161140891	5.141327391	4.111122721	0.042602072	0.831149255
ENSMUSG00000024104	D6Wsu116e	TSS30599	6:116208032-116262668	0.140570669	6.395561787	4.110111274	0.042627558	0.831149255
ENSMUSG00000028843	Sh3bgrl3	TSS58791,TSS58795,TSS8553	4:134102569-134128789	0.211349246	4.377643248	4.108475288	0.042668813	0.831149255
ENSMUSG00000026824	Kcnj3	TSS31089,TSS38143,TSS42872	2:55433513-55598145	0.323536031	4.950814831	4.100032585	0.042882387	0.831149255
ENSMUSG00000029060	Mib2	TSS25610,TSS35866,TSS50658,TSS6053,TSS6058,TSS6060,TSS66335,TSS74300	4:155654676-155669198	0.221207998	4.601324245	4.097194213	0.042954441	0.831149255
ENSMUSG00000023913	Pla2g7	TSS21824,TSS26010,TSS48417,TSS55689,TSS61685,TSS73768	17:43568097-43612201	0.346594838	2.099791446	4.091916005	0.043088771	0.831149255
ENSMUSG00000096010	Hist4h4	TSS52809	6:136801552-136804431	-0.404187176	3.518289996	4.089721095	0.043144761	0.831149255
ENSMUSG00000035941	Ibtk	TSS15428	9:85687360-85749334	-0.122172405	6.854794918	4.079398811	0.043409101	0.831149255
ENSMUSG00000035824	Tk2	TSS5735	8:104226690-104248558	0.294615815	3.34084941	4.078919592	0.043421415	0.831149255
ENSMUSG00000087079	Gm13389	TSS17379	2:6539704-7081313	-0.472418367	1.436918314	4.07712446	0.043467573	0.831149255
ENSMUSG00000021268	Meg3	TSS22174,TSS22319,TSS23574,TSS27514,TSS30360,TSS30985,TSS31764,TSS31963,TSS6710,TSS6711,TSS67463	12:109541000-109571726	0.159816211	6.600677081	4.073202542	0.043568597	0.831149255
ENSMUSG00000020074	Ccar1	TSS64479	10:62743927-62792368	-0.121650023	7.164038525	4.072233188	0.043593605	0.831149255
ENSMUSG00000003779	Kif20a	TSS23502,TSS76978	18:34624623-34651735	-0.138829668	6.532676436	4.071852404	0.043603432	0.831149255
ENSMUSG00000027669	Gnb4	TSS35144,TSS57900,TSS6250,TSS67121,TSS67127	3:32580331-32616585	0.157378942	6.115866253	4.071742704	0.043606264	0.831149255
ENSMUSG00000020561	Twistnb	TSS26659	12:33429623-33439380	0.195761199	4.236750687	4.069733078	0.043658173	0.831149255
ENSMUSG00000026043	Col3a1	TSS13626,TSS15181	1:45311537-45349706	0.16350404	11.19911086	4.068247677	0.043696582	0.831149255
ENSMUSG00000000957	Mmp14	TSS10013	14:54431603-54441258	0.173318574	6.383376287	4.064764578	0.043786788	0.831149255
ENSMUSG00000019158	Tmem160	TSS80368	7:16452778-16455489	-0.324357601	3.394708318	4.060469502	0.043898293	0.831149255
ENSMUSG00000030327	Necap1	TSS64265	6:122874556-122888934	-0.147140465	5.404663355	4.056729096	0.043995641	0.831149255
ENSMUSG00000020234	4930404N11Rik	TSS1855,TSS21058,TSS39161,TSS57567	10:81357490-81378516	-0.463692282	2.34415474	4.055679252	0.044023005	0.831149255
ENSMUSG00000036840	Siah1a	TSS62441	8:86723939-86746603	0.17772109	4.806416804	4.05330667	0.044084912	0.831149255
ENSMUSG00000025268	Maged2	TSS15578,TSS15647,TSS22204,TSS47468,TSS47480,TSS55481,TSS73150,TSS84542,TSS86078,TSS9378	X:150806369-150814345	0.173842785	7.998118007	4.051876157	0.044122282	0.831149255
ENSMUSG00000027314	Dll4	TSS48138,TSS73062	2:119321186-119335962	0.220807198	4.695220542	4.05080715	0.04415023	0.831149255
ENSMUSG00000090458	Gm17122	TSS7558	5:113842435-113908758	0.311419115	2.812147258	4.036380805	0.044529221	0.831149255
ENSMUSG00000020542	Myocd	TSS50209,TSS53027,TSS68509,TSS7568,TSS77609,TSS8642	11:65176560-65269989	-0.126487781	7.50136321	4.03372788	0.044599288	0.831149255
ENSMUSG00000094377	U4	TSS31866	5:115490253-115490394	-0.349150081	5.993442975	4.031000281	0.044671447	0.831149255
ENSMUSG00000031963	Bmper	TSS24752	9:23223075-23485202	-0.332703988	3.455611668	4.026870893	0.044780926	0.831149255
ENSMUSG00000040270	Bach2	TSS16222,TSS22782,TSS30977,TSS55428,TSS63395,TSS7660,TSS78732	4:32238803-32586108	-0.236111153	3.92756346	4.024498103	0.044843961	0.831149255
ENSMUSG00000029101	Rgs12	TSS29671,TSS3773,TSS51988,TSS52842,TSS53292,TSS56124,TSS59776,TSS6507,TSS675,TSS73846,TSS75117,TSS75772,TSS77482,TSS81831,TSS84003	5:34949444-35039644	0.15276351	6.33805259	4.021661444	0.044919442	0.831149255
ENSMUSG00000027654	Fam83d	TSS4658,TSS83117	2:158768092-158786637	-0.149329205	5.561193281	4.017583145	0.045028196	0.831149255
ENSMUSG00000092674	Metazoa_SRP	TSS50796	5:149247953-149248244	-0.30161936	3.728256126	4.017313142	0.045035406	0.831149255
ENSMUSG00000006057	Atp5g1	TSS12183,TSS15067,TSS20706,TSS35132	11:96068851-96075670	-0.142984725	8.226238551	4.012939542	0.045152363	0.831149255
ENSMUSG00000026657	Frmd4a	TSS13724,TSS15536,TSS1957,TSS19911,TSS31674,TSS41266,TSS47608,TSS50727,TSS53182,TSS62244,TSS65849,TSS65851,TSS70948,TSS71517,TSS82492,TSS82519,TSS84214,TSS85958,TSS9988	2:4017716-4614043	-0.132700282	6.236121702	4.012841453	0.04515499	0.831149255
ENSMUSG00000031431	Tsc22d3	TSS32786,TSS35847,TSS44167,TSS64638,TSS80236,TSS83962	X:140539527-140600659	0.120206985	7.305175427	4.005649776	0.045348014	0.831149255
ENSMUSG00000020424	Gatsl3	TSS26834	11:4218224-4222409	0.478066076	1.736982358	4.001946193	0.045447757	0.831149255
ENSMUSG00000043740	B430306N03Rik	TSS13542,TSS22564,TSS36142,TSS82979	17:48316140-48327024	-0.491015583	1.676076663	4.00087052	0.04547677	0.831149255
ENSMUSG00000047686	Zcchc5	TSS74918	X:106837081-106840644	0.177250448	4.859191148	3.999250818	0.045520493	0.831149255
ENSMUSG00000032254	Kif23	TSS646	9:61917279-61946799	-0.151016523	6.147402013	3.996108971	0.045605432	0.831149255
ENSMUSG00000038872	Zfhx3	TSS77319	8:108714643-108961636	-0.287315416	3.602169629	3.995716878	0.045616044	0.831149255
ENSMUSG00000019467	Arhgef25	TSS16026,TSS45567	10:127182520-127190054	0.209607367	4.523026135	3.99521545	0.045629618	0.831149255
ENSMUSG00000025135	Anapc11	TSS30343,TSS44254,TSS49686,TSS63474	11:120598420-120608198	-0.203731307	5.262447863	3.994779723	0.045641418	0.831149255
ENSMUSG00000021190	Lgmn	TSS53426,TSS65522,TSS73957	12:102394083-102439813	0.140755694	6.355019377	3.994114281	0.045659444	0.831149255
ENSMUSG00000026042	Col5a2	TSS47633,TSS61247,TSS7998	1:45374320-45503282	0.149992346	8.518345649	3.99183457	0.045721257	0.831149255
ENSMUSG00000040596	Pogk	TSS12733,TSS27691,TSS30896,TSS69352,TSS7461,TSS75680	1:166379096-166409863	0.146493759	6.499364874	3.990132628	0.045767462	0.831149255
ENSMUSG00000030785	Cox6a2	TSS82249	7:128154375-128223816	-0.252623899	7.819812705	3.988763777	0.045804659	0.831149255
ENSMUSG00000031805	Jak3	TSS22683,TSS34195,TSS75900,TSS85452	8:71674956-71690575	0.251476242	3.713256109	3.988032035	0.045824556	0.831149255
ENSMUSG00000028678	Kif2c	TSS28193,TSS30491,TSS52824,TSS52828,TSS61684,TSS67348,TSS73323,TSS79184	4:117159638-117182639	-0.150835644	5.638462033	3.986471244	0.045867028	0.831149255
ENSMUSG00000020802	Ube2o	TSS38275,TSS53467,TSS79758	11:116537739-116581447	0.267042485	5.348503081	3.984529724	0.045919918	0.831149255
ENSMUSG00000028164	Manba	TSS13910,TSS27597,TSS32673,TSS35886,TSS54962,TSS72106,TSS735,TSS741,TSS74454,TSS81168	3:135485610-135571404	0.128184417	6.337060717	3.984518172	0.045920232	0.831149255
ENSMUSG00000028223	Decr1	TSS34916,TSS68566,TSS78937	4:15917239-15945507	0.177888855	6.978727664	3.984107069	0.04593144	0.831149255
ENSMUSG00000038646	Fam103a1	TSS20885,TSS49088,TSS7491	7:81762924-81769491	0.189500545	4.490240113	3.983114877	0.0459585	0.831149255
ENSMUSG00000023945	Slc5a7	TSS49652	17:54273593-54299034	0.445434713	1.762453069	3.979445988	0.04605871	0.831149255
ENSMUSG00000026895	Ndufa8	TSS65800	2:36036325-36049406	-0.134284939	7.519103099	3.978875618	0.046074309	0.831149255
ENSMUSG00000026639	Lamb3	TSS28693,TSS4592,TSS47943,TSS73678	1:193301956-193343878	0.316921117	3.327652582	3.977758531	0.046104877	0.831149255
ENSMUSG00000024371	C2	TSS30461,TSS35250,TSS4964,TSS76174,TSS78873,TSS80402,TSS82517,TSS8355,TSS84732	17:34856373-34898265	0.441941115	1.646961953	3.975562163	0.046165041	0.831149255
ENSMUSG00000028383	Hsdl2	TSS31766,TSS74129,TSS78596	4:59581562-59618689	0.147999604	7.131418173	3.972126192	0.046259327	0.831149255
ENSMUSG00000092500	Gm20400	TSS23439	6:142085760-142208521	0.343042683	2.596078735	3.971404382	0.046279159	0.831149255
ENSMUSG00000028609	Magoh	TSS46248,TSS57988	4:107879754-107887424	-0.172507005	4.748203021	3.970275652	0.046310191	0.831149255
ENSMUSG00000041075	Fzd7	TSS13059,TSS85859	1:59482146-59486947	0.352391548	2.843335091	3.96932851	0.046336247	0.831149255
ENSMUSG00000045333	Zfp423	TSS25910,TSS27452,TSS27572,TSS31405,TSS37572,TSS76237,TSS78762	8:87661809-87959595	-0.356265208	2.326749067	3.968563492	0.046357304	0.831149255
ENSMUSG00000085023	Gm12744	TSS22852	4:106561037-106589113	-0.426863709	2.630058521	3.967653794	0.046382356	0.831149255
ENSMUSG00000081492	Gm9311	TSS5497	17:73107984-73243368	-0.456506974	1.435815962	3.964812047	0.046460708	0.831149255
ENSMUSG00000042286	Stab1	TSS10138,TSS13860,TSS20495,TSS23871,TSS44389,TSS50700,TSS5225,TSS53634,TSS54665,TSS56803,TSS59363,TSS67905,TSS79816	14:31134852-31168641	0.188332692	7.13010142	3.962631072	0.046520936	0.831149255
ENSMUSG00000024302	Dtna	TSS34075	18:23415414-23659714	-0.231725513	5.088702638	3.961411522	0.04655465	0.831149255
ENSMUSG00000041992	Rapgef5	TSS57510	12:117516478-117756978	0.177804238	5.668653964	3.961346298	0.046556454	0.831149255
ENSMUSG00000086369	E330017L17Rik	TSS31373,TSS39073,TSS49840,TSS59493	4:129906215-129919787	-0.316465992	2.667283034	3.958463051	0.046636266	0.831448995
ENSMUSG00000049807	Arhgap23	TSS33812,TSS43949,TSS46939,TSS62419,TSS76098	11:97415532-97502402	-0.216553124	5.370854438	3.954030302	0.046759251	0.832516604
ENSMUSG00000051853	Arf3	TSS20949,TSS58265,TSS58269	15:98737620-98763214	0.161125544	6.222290596	3.951432559	0.046831484	0.832678932
ENSMUSG00000016933	Plcg1	TSS16014,TSS18436,TSS26386,TSS32092,TSS3461,TSS60202,TSS62960,TSS63804,TSS69492,TSS70045,TSS71682,TSS78555	2:160731299-160906002	0.122517445	7.085703678	3.946788674	0.046960905	0.833751764
ENSMUSG00000065176	U12	TSS20509	15:83149643-83149794	-0.528180773	2.019891598	3.940396633	0.047139662	0.833751764
ENSMUSG00000045411	2410002F23Rik	TSS1064,TSS1068,TSS13418,TSS17541,TSS20230,TSS36897,TSS42943,TSS55292,TSS55299,TSS71049,TSS73602,TSS74483,TSS74488,TSS74490,TSS80982	7:44246721-44262720	0.19158753	5.516538758	3.940344909	0.047141111	0.833751764
ENSMUSG00000015968	Cacna1d	TSS56927,TSS7123	14:30009022-30527056	0.209400439	3.948217525	3.940220122	0.047144608	0.833751764
ENSMUSG00000040703	Cyp2s1	TSS10459,TSS18155,TSS46815,TSS66267	7:25802474-25820654	0.399642398	2.426955098	3.937061564	0.047233214	0.83420052
ENSMUSG00000029591	Ung	TSS34024,TSS35188,TSS65026,TSS67943,TSS70038	5:114130385-114139323	-0.207853069	4.840202451	3.933778484	0.047325499	0.834712972
ENSMUSG00000030218	Mgp	TSS19455	6:136872435-136875805	0.136959185	6.301696738	3.928779099	0.047466393	0.83608027
ENSMUSG00000038930	Rccd1	TSS11846,TSS17702,TSS21566,TSS22307,TSS22312,TSS24068,TSS24283,TSS34285,TSS61927	7:80316595-80324454	-0.263412851	3.455687372	3.923359081	0.047619642	0.8367717
ENSMUSG00000069300	Hist1h2bj	TSS6532	13:22043213-22043676	-0.442081258	3.313884572	3.920499927	0.047700693	0.8367717
ENSMUSG00000003604	Aven	TSS48182,TSS48307,TSS5701	2:112492963-113217096	-0.205010806	4.022468717	3.918714583	0.047751378	0.8367717
ENSMUSG00000017188	Coa3	TSS19322,TSS52982	11:101277967-101302286	-0.148890413	5.520286221	3.915362544	0.047846694	0.8367717
ENSMUSG00000087687	2900053A13Rik	TSS46247	8:3621550-3625545	-0.245561291	3.550481767	3.91325357	0.047906766	0.8367717
ENSMUSG00000022945	Chaf1b	TSS11755,TSS14666,TSS1991,TSS26531,TSS33905,TSS46671,TSS69027,TSS75247	16:93883900-93906115	-0.225604155	4.497598829	3.911886203	0.047945757	0.8367717
ENSMUSG00000042846	Lrrtm3	TSS1929,TSS24220,TSS24223,TSS56168	10:63430097-65003667	-0.300917534	4.609154238	3.9109164	0.047973431	0.8367717
ENSMUSG00000031171	Ftsj1	TSS29883,TSS31723,TSS37046,TSS77420,TSS82851,TSS83108,TSS86008	X:8238667-8252406	-0.220126371	3.989708697	3.909166646	0.048023405	0.8367717
ENSMUSG00000091845	Gm4604	TSS62745	6:108107027-108185582	-0.336177539	3.172463517	3.903272998	0.048192135	0.8367717
ENSMUSG00000093954	SLC25A37	TSS22728,TSS8580	14:69390853-69503362	0.457419705	1.83290501	3.900982058	0.048257891	0.8367717
ENSMUSG00000061411	8430427H17Rik	TSS20858,TSS26994,TSS35465,TSS36628,TSS44303,TSS54330	2:153407461-153529971	0.209589166	4.316400613	3.900145735	0.048281919	0.8367717
ENSMUSG00000018659	Pnpo	TSS25278,TSS63303,TSS74701	11:96907425-96982959	0.244253091	4.5688982	3.899835265	0.048290843	0.8367717
ENSMUSG00000071528	Usmg5	TSS74120	19:47067747-47090625	-0.153141278	7.53824909	3.897418193	0.048360372	0.8367717
ENSMUSG00000017999	Ddx27	TSS21985,TSS5146,TSS59348,TSS68606,TSS79753	2:167015192-167034947	0.16526312	5.112636363	3.889704562	0.048582969	0.8367717
ENSMUSG00000020219	Timm13	TSS19479	10:80899449-80900969	-0.228247287	5.587657177	3.88846485	0.048618845	0.8367717
ENSMUSG00000029283	Cdc7	TSS30677,TSS41607,TSS63863,TSS65093,TSS66938,TSS73555	5:106964321-106984432	-0.211616706	5.168463256	3.887969508	0.048633188	0.8367717
ENSMUSG00000074578	1500012F01Rik	TSS37748,TSS38457,TSS53369,TSS72617,TSS85303	2:167035792-167065862	0.174130172	4.659249219	3.886369807	0.048679537	0.8367717
ENSMUSG00000074971	Fibin	TSS39214	2:110360924-110362993	0.313008519	2.815414643	3.882367671	0.048795698	0.8367717
ENSMUSG00000093077	Mir5105	TSS77754	5:146231229-146302874	-1.121959745	6.352440075	3.881698873	0.048815139	0.8367717
ENSMUSG00000097330	AC020971.1	TSS27310,TSS64233	18:37674334-37841873	-0.209371264	4.742302539	3.877628189	0.04893364	0.8367717
ENSMUSG00000074793	Hspa12b	TSS26282,TSS31668,TSS41365	2:131127279-131146321	0.168723213	5.210135451	3.876622976	0.048962949	0.8367717
ENSMUSG00000045160	Bola3	TSS10583,TSS29198,TSS30158,TSS35877,TSS35917,TSS43961,TSS51983,TSS64413	6:83349146-83360136	-0.159447479	5.648105757	3.875357079	0.048999886	0.8367717
ENSMUSG00000025647	Shisa5	TSS11608,TSS13648,TSS15915,TSS24061,TSS32944,TSS38738,TSS40671,TSS40673,TSS50338,TSS54341,TSS59113,TSS59890,TSS69219,TSS73621,TSS79045,TSS9782	9:109038564-109057724	0.206109232	5.233561171	3.874652952	0.049020443	0.8367717
ENSMUSG00000028309	Rnf20	TSS185,TSS19426,TSS29808,TSS36507,TSS37424,TSS41506,TSS70612,TSS77844,TSS9300	4:49632005-49656887	0.116907253	6.670241315	3.872628244	0.049079608	0.8367717
ENSMUSG00000022089	Bin3	TSS52215	14:70100144-70153811	0.223806631	3.719691551	3.87017334	0.049151445	0.8367717
ENSMUSG00000027339	Rassf2	TSS10990,TSS17292,TSS25697,TSS66948,TSS7651	2:131989414-132030258	0.220966334	4.510495504	3.869545627	0.049169831	0.8367717
ENSMUSG00000023341	Mx2	TSS38267	16:97536082-97560899	-0.577212684	1.56166879	3.867298354	0.049235715	0.8367717
ENSMUSG00000026104	Stat1	TSS33608	1:52119437-52161865	-0.248108846	6.326663087	3.865736525	0.049281559	0.8367717
ENSMUSG00000074676	Foxs1	TSS83184	2:152931897-152933208	0.372197152	2.037486213	3.862597766	0.049373826	0.83694533
ENSMUSG00000064264	Zfp428	TSS11600,TSS24953,TSS70385,TSS72590	7:24507005-24515682	-0.362528009	2.566946584	3.860089573	0.049447688	0.83694533
ENSMUSG00000031880	Rrad	TSS24237	8:104628065-104631321	-0.193252909	6.73156577	3.856887876	0.049542143	0.83694533
ENSMUSG00000028447	Dctn3	TSS37456,TSS50789,TSS9152	4:41699988-41774247	-0.153530545	4.932667427	3.856772855	0.049545539	0.83694533
ENSMUSG00000060860	Ube2s	TSS38931	7:4808154-4812351	-0.125289587	6.912756368	3.854589035	0.049610079	0.836963904
ENSMUSG00000028364	Tnc	TSS20881,TSS71607	4:63959784-64149924	0.187634401	6.531352984	3.851343905	0.049706148	0.837513681
ENSMUSG00000078441	Scamp4	TSS23499,TSS81001	10:80602879-80615783	-0.231690453	4.383214926	3.845846558	0.049869341	0.837998464
ENSMUSG00000097619	AC133578.3	TSS2568,TSS34830,TSS72463	15:96134818-96283608	-0.413348503	1.821709795	3.841650615	0.049994281	0.837998464
ENSMUSG00000017299	Dnttip1	TSS1946,TSS22603,TSS59106,TSS7055	2:164745982-164769666	0.195701819	4.332282016	3.840877981	0.050017323	0.837998464
ENSMUSG00000021069	Pygl	TSS22253,TSS4333,TSS44225,TSS49862,TSS9651	12:70190810-70234165	0.170631978	6.666320871	3.839789407	0.050049807	0.837998464
ENSMUSG00000030493	C230052I12Rik	TSS51006,TSS75111,TSS9710	7:35334174-35396817	-0.271699845	2.73760959	3.839698803	0.050052512	0.837998464
ENSMUSG00000022564	Grina	TSS74057	15:76246806-76249904	0.185655968	5.780038935	3.832169	0.05027783	0.839608178
ENSMUSG00000007038	Neu1	TSS28821,TSS69288,TSS9632	17:34931252-34935953	0.207639336	4.363216075	3.83000805	0.050342691	0.839608178
ENSMUSG00000067847	Romo1	TSS38606,TSS38610,TSS47008,TSS6638	2:156071844-156145797	-0.26761953	4.665516021	3.827042563	0.050431844	0.839608178
ENSMUSG00000041889	Shisa4	TSS13378,TSS63701,TSS9490	1:135371056-135375237	-0.258629862	3.05084154	3.827017	0.050432613	0.839608178
ENSMUSG00000034533	Scn10a	TSS886	9:119608455-119719032	0.284744425	2.946623205	3.824489321	0.050508737	0.839608178
ENSMUSG00000029998	Pcyox1	TSS22744,TSS2651,TSS28123,TSS37104	6:86386005-86397150	0.130180908	6.524634589	3.821886031	0.050587266	0.839608178
ENSMUSG00000086320	Gm12840	TSS33410	4:117700187-117700923	0.177115024	5.542059301	3.819325748	0.050664622	0.839608178
ENSMUSG00000033364	Usp37	TSS70685	1:74409375-74588246	-0.158362727	6.168048469	3.817591086	0.050717105	0.839608178
ENSMUSG00000024791	Cdca5	TSS20280,TSS28625,TSS77799	19:6084982-6091777	-0.240848522	4.16572439	3.811099802	0.050914009	0.839608178
ENSMUSG00000019823	Mical1	TSS226,TSS37358,TSS40386,TSS43390,TSS44599,TSS500,TSS54259,TSS56758,TSS64687,TSS75947,TSS79605	10:41476313-41490369	0.16103611	5.518027168	3.808704714	0.050986865	0.839608178
ENSMUSG00000021831	Ero1l	TSS44408	14:45283091-45318572	0.135662378	6.342920282	3.806374972	0.051057839	0.839608178
ENSMUSG00000035559	Mpv17l2	TSS17905	8:70754678-70760921	-0.260453706	3.227865803	3.803363234	0.051149745	0.839608178
ENSMUSG00000044894	Uqcrq	TSS24589,TSS43555,TSS78787	11:53427921-53430831	-0.254474342	6.606619826	3.802895604	0.05116403	0.839608178
ENSMUSG00000057193	Slc44a2	TSS67327	9:21337827-21355025	0.147762886	6.129553639	3.801265778	0.051213853	0.839608178
ENSMUSG00000084708	SNORA48	TSS64329	11:69666935-69672423	-0.471258138	2.633806324	3.797011702	0.05134414	0.839608178
ENSMUSG00000061118	Dnajc30	TSS64955	5:135052956-135065365	-0.241830075	3.203104658	3.796212483	0.051368656	0.839608178
ENSMUSG00000028175	Depdc1a	TSS13228,TSS13234,TSS35603	3:159495432-159529955	-0.217755687	5.313072704	3.794654682	0.051416478	0.839608178
ENSMUSG00000073758	Sh3d21	TSS16198,TSS18633,TSS63500,TSS67456,TSS76906	4:126150601-126163491	0.433912041	1.984851652	3.793809887	0.051442431	0.839608178
ENSMUSG00000059534	Uqcr10	TSS10180,TSS18653,TSS69961	11:4701972-4704342	-0.150154484	7.629856876	3.793470474	0.051452862	0.839608178
ENSMUSG00000006216	Clcnkb	TSS36432,TSS38841,TSS57668	4:141398828-141416014	0.489039038	1.344995967	3.793076234	0.051464981	0.839608178
ENSMUSG00000067212	H2-T23	TSS10982,TSS11670,TSS33396,TSS52529,TSS55641	17:35994452-36129692	-0.375873347	1.871085915	3.791377136	0.051517246	0.839608178
ENSMUSG00000047261	Gap43	TSS11965,TSS49394	16:42248441-42340651	0.302504073	2.901762503	3.790353929	0.051548747	0.839608178
ENSMUSG00000051627	Hist1h1e	TSS60763	13:23621754-23622502	-0.259210074	7.08901933	3.784128794	0.051740839	0.839886517
ENSMUSG00000040584	Abcb1a	TSS17363,TSS27051,TSS33965,TSS72786	5:8660076-8748575	-0.279015632	3.516255103	3.784051934	0.051743216	0.839886517
ENSMUSG00000060477	Irak2	TSS41614,TSS51270,TSS5173,TSS57699,TSS80983,TSS84032	6:113638466-113695009	0.269403701	3.090791185	3.781731587	0.051815013	0.839886517
ENSMUSG00000031872	Bean1	TSS59712	8:104170512-104219092	0.424035841	1.631399148	3.78155495	0.051820482	0.839886517
ENSMUSG00000069049	Eif2s3y	TSS14905,TSS15971,TSS30253,TSS31170,TSS55906,TSS72350	Y:1010542-1028847	-0.155538624	6.537628202	3.773170314	0.052080832	0.841302991
ENSMUSG00000038299	Wdr36	TSS49522	18:32663641-32866420	0.131944522	5.689993244	3.77265531	0.052096868	0.841302991
ENSMUSG00000024378	Stard4	TSS16181,TSS48137,TSS51950,TSS71312	18:33199354-33213862	-0.185022113	5.337234295	3.76904466	0.052209444	0.841302991
ENSMUSG00000021127	Zfp36l1	TSS60219,TSS81450	12:80107759-80113013	0.234041815	4.996692351	3.769036522	0.052209698	0.841302991
ENSMUSG00000021686	Ap3b1	TSS82221	13:94358959-94566316	0.134014315	6.281049173	3.768491228	0.052226722	0.841302991
ENSMUSG00000026478	Lamc1	TSS2267,TSS35387,TSS48991,TSS58209,TSS78678	1:153218921-153332786	0.120198463	9.611389229	3.765303497	0.052326361	0.841697365
ENSMUSG00000090946	Ccdc71l	TSS43622	12:32378788-32382943	0.187062004	4.199471371	3.762300577	0.052420407	0.841697365
ENSMUSG00000097246	AC149052.1	TSS62447	7:19581043-19604468	0.338281026	2.186648551	3.761592766	0.052442601	0.841697365
ENSMUSG00000078812	Eif5a	TSS1186,TSS13936,TSS14531,TSS18015,TSS1917,TSS23112,TSS30705,TSS45046,TSS5080	11:69916713-69921958	-0.136264985	7.98264487	3.756894098	0.05259018	0.842185913
ENSMUSG00000025586	Cpeb1	TSS24181,TSS28656,TSS36947,TSS440,TSS50206,TSS60800,TSS65789,TSS6745	7:81347025-81455465	0.615652247	1.112751843	3.756559321	0.052600712	0.842185913
ENSMUSG00000034780	B3galt1	TSS36973,TSS43043,TSS60520	2:67748211-68122689	-0.332949397	3.136610001	3.751450467	0.052761708	0.842808458
ENSMUSG00000028470	Hint2	TSS23003,TSS23173,TSS45465,TSS47230,TSS50411,TSS57826	4:43654226-43656466	-0.185263911	4.692956489	3.748559794	0.052853033	0.842808458
ENSMUSG00000016128	Stard13	TSS38470,TSS44593,TSS50849,TSS56310,TSS64264,TSS70305	5:151037627-151233836	0.17355363	4.944467655	3.742825801	0.053034682	0.842808458
ENSMUSG00000040473	A330021E22Rik	TSS18379,TSS42053,TSS5367,TSS54674,TSS61461,TSS61505,TSS70288,TSS70519,TSS7215	5:5579277-5664239	0.422886689	2.594330598	3.742642086	0.053040513	0.842808458
ENSMUSG00000033405	Nudt15	TSS32237	14:73519863-73596142	-0.311856929	2.367945443	3.742406326	0.053047997	0.842808458
ENSMUSG00000022451	Twf1	TSS5041,TSS66718,TSS72818,TSS77181	15:94543642-94589889	0.159185989	5.458654149	3.740540063	0.053107277	0.842808458
ENSMUSG00000040488	Ltbp4	TSS20684,TSS33814,TSS48393,TSS49744,TSS54894,TSS71975,TSS74785,TSS78294	7:27305135-27337692	-0.29971602	6.262493459	3.740079666	0.053121912	0.842808458
ENSMUSG00000022620	Arsa	TSS32306,TSS56837,TSS70609,TSS80191	15:89472475-89484847	0.252899921	4.24522953	3.73917574	0.053150658	0.842808458
ENSMUSG00000003518	Dusp3	TSS3554,TSS51611,TSS63439,TSS63656,TSS67834,TSS78146	11:101971142-101992264	0.123197197	7.458908456	3.734279777	0.053306643	0.843968179
ENSMUSG00000085328	Gm17131	TSS55315	5:127783490-128433077	-0.248556679	8.05342327	3.732664512	0.053358212	0.843968179
ENSMUSG00000071862	Lrrtm2	TSS103	18:35118887-35254773	-0.400368742	4.47914648	3.725761717	0.053579184	0.843968179
ENSMUSG00000045374	Wdr81	TSS21943,TSS29092,TSS80378,TSS86055	11:75440943-75454717	0.287302585	3.883334435	3.723218441	0.053660844	0.843968179
ENSMUSG00000046058	Eid2	TSS82448	7:28267880-28269165	0.346591149	2.657411508	3.721438148	0.053718084	0.843968179
ENSMUSG00000073435	Nme3	TSS17395,TSS27938,TSS60919,TSS7477,TSS81266	17:24886642-24936977	-0.341218617	2.286119944	3.718981119	0.053797189	0.843968179
ENSMUSG00000038690	Atp5j2	TSS18707,TSS21832,TSS86034	5:145183697-145192062	-0.122854604	7.50997056	3.717425373	0.053847341	0.843968179
ENSMUSG00000025702	Mar-08	TSS38032,TSS51799,TSS54208,TSS57735,TSS61761,TSS83401,TSS83543,TSS84274,TSS86152,TSS86153,TSS9572	6:116338023-116409540	0.123078774	6.358646306	3.717102261	0.053857763	0.843968179
ENSMUSG00000029524	Sirt4	TSS16409,TSS2700,TSS37777,TSS74672,TSS77362,TSS80248	5:115478009-115484725	0.289257625	3.240649769	3.714357892	0.05394637	0.843968179
ENSMUSG00000041757	Plekha6	TSS40986	1:133246096-133303435	-0.193987338	5.694100928	3.713486971	0.053974522	0.843968179
ENSMUSG00000048327	Ckap2l	TSS67868	2:129246375-129297212	-0.142440293	6.203144663	3.712068169	0.054020417	0.843968179
ENSMUSG00000034993	Vat1	TSS33420	11:101458744-101471853	0.220861685	5.537970315	3.711624137	0.054034789	0.843968179
ENSMUSG00000093385	A330044P14Rik	TSS7533	6:123934425-123982173	-0.22676307	4.98331098	3.710987034	0.054055417	0.843968179
ENSMUSG00000049422	Chchd10	TSS34872	10:75935572-75940672	-0.23817802	6.869873668	3.705927844	0.054219518	0.844005501
ENSMUSG00000052293	Taf9	TSS56194,TSS58038	13:100651342-100666413	-0.139943568	5.353593606	3.705854099	0.054221914	0.844005501
ENSMUSG00000025571	Tnrc6c	TSS11922,TSS40270,TSS56312,TSS74075,TSS85192,TSS9366	11:117654288-117763439	-0.122252344	6.630988561	3.702360113	0.05433556	0.844005501
ENSMUSG00000018800	Abca5	TSS29450,TSS29572,TSS44115,TSS51904,TSS51908	11:110269368-110337716	0.183428849	4.608621515	3.70174164	0.054355703	0.844005501
ENSMUSG00000041548	Hspb8	TSS10689,TSS49539	5:116408490-116422864	-0.143368358	5.982020839	3.700034406	0.054411346	0.844005501
ENSMUSG00000063160	Numbl	TSS2886,TSS42512,TSS49454,TSS82785,TSS83550	7:27233022-27282144	0.233096463	3.645461236	3.697336575	0.054499399	0.844005501
ENSMUSG00000031099	Smarca1	TSS33205,TSS38557,TSS43777,TSS65206,TSS66145,TSS70293	X:47809367-47892974	0.130969563	5.938214324	3.695739573	0.054551593	0.844005501
ENSMUSG00000007659	Bcl2l1	TSS27267,TSS4344,TSS45902,TSS52592,TSS54403,TSS61079,TSS65528,TSS66252,TSS7519	2:152780667-152831728	0.161180023	5.20509087	3.695189082	0.054569597	0.844005501
ENSMUSG00000064373	Sepp1	TSS25664,TSS2602,TSS3796,TSS58899,TSS74863,TSS85214,TSS9132	15:3268546-3280508	0.217889327	7.603069975	3.691585168	0.054687619	0.844840465
ENSMUSG00000036606	Plxnb2	TSS15547,TSS67650,TSS68597,TSS74578,TSS9388,TSS9694	15:89155548-89171120	0.140344868	8.130536486	3.688366071	0.054793268	0.844928017
ENSMUSG00000023020	2310016M24Rik	TSS1360	15:99725617-99728136	-0.190082057	5.1081427	3.685730785	0.054879917	0.844928017
ENSMUSG00000026278	Bok	TSS68544	1:93685693-93695762	-0.275412283	3.804243854	3.685563661	0.054885417	0.844928017
ENSMUSG00000038866	Zcchc2	TSS1925,TSS39425,TSS9197	1:105990405-106034074	-0.183260225	4.942759998	3.681250544	0.055027563	0.846128955
ENSMUSG00000028614	Tmem48	TSS15169,TSS30113,TSS36087,TSS52036,TSS57728,TSS72072	4:107367783-107416346	-0.163657715	5.908327429	3.674532826	0.055249735	0.848556175
ENSMUSG00000034243	Golgb1	TSS10966,TSS11352,TSS18674,TSS26602,TSS63083,TSS74930,TSS8673	16:36875139-36933085	0.117351228	7.248283475	3.668447325	0.055451819	0.849164777
ENSMUSG00000022361	Zhx1	TSS26307,TSS26952,TSS29153,TSS38853,TSS47281,TSS51510,TSS56921,TSS5881	15:58022275-58076541	0.130605424	5.883614651	3.665787597	0.055540388	0.849164777
ENSMUSG00000028041	Adam15	TSS14645,TSS16560,TSS244,TSS30903,TSS31858,TSS37141,TSS46655,TSS46693,TSS6163,TSS6380,TSS65746,TSS68959,TSS68960	3:89333389-89349996	0.180025952	5.837087793	3.665580612	0.055547287	0.849164777
ENSMUSG00000029859	Epha1	TSS15192	6:42349827-42373268	0.3672352	1.91282255	3.665553081	0.055548204	0.849164777
ENSMUSG00000044700	Tmem201	TSS21955,TSS40577,TSS4733,TSS76930	4:149715374-149738044	-0.187346518	6.243408524	3.663664771	0.055611185	0.849164777
ENSMUSG00000069301	Hist1h2ag	TSS31637	13:22042478-22042949	-0.504176497	1.279310764	3.659701581	0.055743616	0.849779163
ENSMUSG00000026202	Tuba4a	TSS11971	1:75210837-75219253	-0.186039113	6.550911313	3.656346738	0.055855981	0.849779163
ENSMUSG00000037458	Azin1	TSS14352,TSS36483,TSS38466,TSS42535,TSS50102,TSS52136,TSS82222,TSS9021	15:38487429-38519266	-0.120609209	9.001367746	3.656335845	0.055856346	0.849779163
ENSMUSG00000027331	D2Ertd750e	TSS11963,TSS14636,TSS16539,TSS29583,TSS40083,TSS40084,TSS48115,TSS84660	2:118814002-118853957	-0.128044489	6.235638384	3.654764266	0.055909066	0.849779163
ENSMUSG00000054434	Tmem120b	TSS15097,TSS2959,TSS33195,TSS42897,TSS55542,TSS566,TSS65194,TSS81840	5:123047372-123250131	-0.306222812	3.095933683	3.646491569	0.056187454	0.850033681
ENSMUSG00000002032	Tmem25	TSS30462,TSS33124	9:44793775-44799307	0.402286372	2.075571971	3.643339393	0.056293916	0.850033681
ENSMUSG00000075538	Gm10855	TSS68709	2:6539704-7081313	-0.381796232	2.733315462	3.63986262	0.056411589	0.850033681
ENSMUSG00000039542	Ncam1	TSS54253,TSS71888	9:49504360-49798922	0.118134337	7.792149117	3.634713323	0.056586349	0.850033681
ENSMUSG00000031536	Polb	TSS2411	8:22628118-22653437	-0.168727431	4.768178949	3.631492076	0.056695966	0.850033681
ENSMUSG00000002109	Ddb2	TSS25140,TSS28511,TSS51651,TSS67896,TSS68790	2:91202884-91236982	0.243528483	3.840221864	3.630533728	0.056728621	0.850033681
ENSMUSG00000087070	Gm12505	TSS33408	4:55410442-55418842	0.2875482	3.0252382	3.630219395	0.056739336	0.850033681
ENSMUSG00000025579	Gaa	TSS11142,TSS14044,TSS4124,TSS49195,TSS57185,TSS63190,TSS7863,TSS7865	11:119267886-119285454	0.217774515	6.417168903	3.629839516	0.056752289	0.850033681
ENSMUSG00000034765	Dusp5	TSS23983	19:53529108-53542431	0.234582747	3.451965666	3.629819798	0.056752961	0.850033681
ENSMUSG00000002948	Map2k7	TSS21287,TSS29820,TSS30527,TSS38745,TSS52232,TSS67188,TSS67436,TSS74502	8:4238739-4251423	-0.131612534	5.713272126	3.626740187	0.056858081	0.850033681
ENSMUSG00000060678	Hist1h4c	TSS66174	13:23698059-23698454	-0.484729938	4.149380101	3.626737571	0.05685817	0.850033681
ENSMUSG00000033478	Fam160b1	TSS22963	19:57361008-57389594	0.131812546	5.751004593	3.62580765	0.056889953	0.850033681
ENSMUSG00000071656	Lrrn4cl	TSS40652	19:8850784-8853909	0.429855295	2.057938739	3.623943851	0.05695371	0.850033681
ENSMUSG00000059772	Slx1b	TSS12668,TSS18145,TSS59809,TSS85073	7:126687458-126697058	0.2382016	3.611227039	3.622437018	0.057005312	0.850033681
ENSMUSG00000020357	Flt4	TSS14685	11:49609262-49652739	0.173144105	5.08559384	3.619159144	0.057117735	0.850033681
ENSMUSG00000062619	2310039H08Rik	TSS66615	17:46442447-46831413	-0.350503672	2.476506518	3.612933898	0.057331893	0.850033681
ENSMUSG00000087935	Snora81	TSS73240	16:23107443-23127737	-0.541940957	1.078697253	3.609850709	0.057438276	0.850033681
ENSMUSG00000053886	Sh2d4a	TSS77135	8:68276566-68347694	-0.157100588	5.519409918	3.609805445	0.057439839	0.850033681
ENSMUSG00000037405	Icam1	TSS42853	9:21015959-21039036	0.293561574	3.418835882	3.609639351	0.057445576	0.850033681
ENSMUSG00000057329	Bcl2	TSS73430	1:106538177-106714274	-0.18697167	5.39097993	3.609539433	0.057449027	0.850033681
ENSMUSG00000002844	Adprh	TSS43728	16:38445398-38453493	-0.164828286	5.627184243	3.608251014	0.057493554	0.850033681
ENSMUSG00000039960	Rhou	TSS56315	8:119910359-124345724	0.197966676	4.521024476	3.60769377	0.057512823	0.850033681
ENSMUSG00000079564	Gm11149	TSS47481	9:49504360-49798922	0.20473965	3.995016744	3.60736269	0.057524275	0.850033681
ENSMUSG00000090157	Gm16534	TSS61131,TSS79017	2:31974435-32084857	-0.305366796	2.923487831	3.606677282	0.05754799	0.850033681
ENSMUSG00000027015	Cybrd1	TSS12080	2:71117922-71142926	0.406279634	1.599050443	3.60492782	0.05760857	0.850033681
ENSMUSG00000034593	Myo5a	TSS15780,TSS34411,TSS35802,TSS45719,TSS45992,TSS46346,TSS54288,TSS58296,TSS63245,TSS71518,TSS73260,TSS8440,TSS85379,TSS85381	9:75071014-75223688	-0.156250529	5.661501255	3.599851178	0.057784744	0.850033681
ENSMUSG00000025359	Pmel	TSS17164	10:128706257-128744056	0.436480467	1.656678642	3.596614614	0.057897361	0.850033681
ENSMUSG00000023004	Tuba1b	TSS26759,TSS62950	15:98931424-98934565	-0.19044703	7.527009924	3.596609674	0.057897533	0.850033681
ENSMUSG00000030037	Mrpl53	TSS16407,TSS49547	6:83101616-83109939	-0.233025547	4.923344259	3.595677969	0.057929995	0.850033681
ENSMUSG00000033938	Ndufb7	TSS74079,TSS83518	8:83566670-83571626	-0.175580554	7.17622052	3.594113548	0.057984545	0.850033681
ENSMUSG00000083594	Gm13722	TSS15325	2:86090335-86093401	-0.24350453	5.464673912	3.593228029	0.058015447	0.850033681
ENSMUSG00000046836	Brox	TSS32452,TSS43297	1:183276341-183324501	0.119665216	6.516862534	3.591975532	0.058059185	0.850033681
ENSMUSG00000028033	Kcnq5	TSS16068,TSS2458,TSS33413,TSS39506	1:21398402-21962530	-0.215584542	3.827870293	3.59094622	0.058095156	0.850033681
ENSMUSG00000028989	Angptl7	TSS7238	4:148448610-148557683	0.322113396	2.703872216	3.587996372	0.058198372	0.850033681
ENSMUSG00000004565	Pnpla6	TSS74587	8:3515383-3544266	0.204479843	4.21298128	3.587225978	0.058225361	0.850033681
ENSMUSG00000027326	Casc5	TSS36192,TSS4362,TSS48948,TSS75891	2:119047118-119105501	-0.150524402	6.711627626	3.585586786	0.05828283	0.850033681
ENSMUSG00000056043	Rgs9bp	TSS59474	7:35578997-35585582	0.440853195	1.830857697	3.582633302	0.058386529	0.850033681
ENSMUSG00000025745	Hadha	TSS11178,TSS4091,TSS4812,TSS65536,TSS76752	5:30103888-30155162	0.142775849	9.617291126	3.581875631	0.058413163	0.850033681
ENSMUSG00000030094	Xpc	TSS84278	6:91489304-91515884	0.169885076	4.715242518	3.579639374	0.058491848	0.850033681
ENSMUSG00000030711	Sult1a1	TSS55851,TSS77773,TSS82287	7:126649222-126676432	0.277060574	3.695645596	3.57660199	0.058598902	0.850033681
ENSMUSG00000030653	Pde2a	TSS36536,TSS61291	7:101421690-101512829	0.143804233	5.565709678	3.575204595	0.058648224	0.850033681
ENSMUSG00000030207	8430419L09Rik	TSS13894,TSS34817,TSS54880,TSS9858	6:135197976-135254336	-0.225410362	3.482603085	3.572260477	0.058752282	0.850033681
ENSMUSG00000087107	AI662270	TSS1588,TSS24962	11:83223575-83226604	0.488762569	1.242229793	3.567395331	0.058924669	0.850033681
ENSMUSG00000024887	Asah2	TSS13886	19:31984653-32061469	0.156930543	5.481877219	3.567387707	0.05892494	0.850033681
ENSMUSG00000027775	Mfsd1	TSS48574	3:67582767-67604231	0.15898185	5.4171075	3.563517505	0.059062458	0.850033681
ENSMUSG00000028851	Nudc	TSS22340,TSS58160,TSS71948	4:133532541-133545996	-0.163772903	6.526894074	3.563441574	0.059065159	0.850033681
ENSMUSG00000030657	Xylt1	TSS56859,TSS59836	7:117380978-117667751	0.375489124	2.240984369	3.561505392	0.059134087	0.850033681
ENSMUSG00000028370	Pappa	TSS27156	4:65124173-65357509	0.347975018	2.698751505	3.560941624	0.059154174	0.850033681
ENSMUSG00000033545	Znrf1	TSS14648,TSS225,TSS23447,TSS32644,TSS38458,TSS39761,TSS5387,TSS56371,TSS61210,TSS77343,TSS81024,TSS85313,TSS85915	8:111536096-111630374	-0.164184616	4.846952858	3.560755062	0.059160822	0.850033681
ENSMUSG00000024427	Spry4	TSS47989	18:38586267-38601268	-0.210011934	4.795117027	3.560732345	0.059161632	0.850033681
ENSMUSG00000021597	Ankrd32	TSS14249,TSS15653,TSS47623,TSS47624,TSS83809,TSS84960	13:77043087-77135473	-0.170957609	5.559964799	3.559326036	0.059211775	0.850033681
ENSMUSG00000028412	Slc44a1	TSS19845,TSS54310,TSS62040,TSS70267,TSS79185	4:53440412-53622478	0.135761508	5.935883871	3.555972798	0.059331521	0.850158264
ENSMUSG00000027508	Pag1	TSS18631,TSS28266,TSS42455,TSS73017	3:9687478-9833679	-0.180639694	4.424160101	3.555474596	0.059349334	0.850158264
ENSMUSG00000030588	Yif1b	TSS10931,TSS11092,TSS46487,TSS56107,TSS74905	7:29238328-29248432	-0.204930475	4.76877741	3.5512598	0.059500259	0.851395795
ENSMUSG00000003458	Ncstn	TSS11810,TSS23242,TSS83879	1:172066012-172122330	0.130682375	6.215903198	3.548890208	0.05958529	0.851688768
ENSMUSG00000040824	Snrpd2	TSS55606	7:19149721-19152735	-0.172091273	5.813275057	3.545193049	0.059718218	0.851947419
ENSMUSG00000028737	Aldh4a1	TSS32495,TSS41768,TSS51026	4:139530547-139670280	-0.136729236	5.811864572	3.544795299	0.059732537	0.851947419
ENSMUSG00000024526	Cidea	TSS39775	18:67321208-67367794	0.324243796	3.108982352	3.542372167	0.059819852	0.852137067
ENSMUSG00000026610	Esrrg	TSS11874,TSS11989,TSS32340,TSS49439,TSS81926	1:187608790-188214885	-0.173142911	5.520188982	3.540843248	0.059875014	0.852137067
ENSMUSG00000052459	Atp6v1a	TSS1254,TSS35990,TSS41485,TSS49780,TSS50735,TSS71529	16:44085401-44139705	0.118057761	6.525596803	3.532209849	0.060187519	0.852888109
ENSMUSG00000019849	Prep	TSS46865	10:45067205-45158997	-0.151519672	6.748846127	3.530380287	0.060253967	0.852888109
ENSMUSG00000040253	Gbp7	TSS23349,TSS81733	3:142530337-142550083	-0.432804882	4.60523361	3.528887227	0.060308251	0.852888109
ENSMUSG00000046312	AI464131	TSS44495,TSS61309	4:41495603-41503076	0.267327188	3.256176546	3.526840342	0.060382755	0.852888109
ENSMUSG00000041632	Mrps27	TSS72822	13:99344785-99415561	-0.131340389	5.858272805	3.526829722	0.060383142	0.852888109
ENSMUSG00000047907	Tshz2	TSS23785,TSS28682,TSS44154,TSS49045,TSS9317	2:169633012-170071816	0.249945368	4.005210177	3.524574959	0.060465327	0.852888109
ENSMUSG00000029171	Pgm1	TSS46819,TSS990	5:64092935-64128355	0.181577069	4.123616658	3.524088035	0.060483091	0.852888109
ENSMUSG00000026811	St6galnac6	TSS1031,TSS10552,TSS12940,TSS12942,TSS14079,TSS2227,TSS23694,TSS30492,TSS31939,TSS34980,TSS398,TSS40419,TSS43770,TSS45228,TSS9643	2:32599708-32620806	0.148878521	6.008585594	3.518348499	0.060692897	0.852888109
ENSMUSG00000006378	Gcat	TSS27633,TSS77074	15:79030873-79043558	-0.354118582	2.761464013	3.517018234	0.060741634	0.852888109
ENSMUSG00000033697	Arhgap39	TSS14823,TSS17908,TSS22208,TSS39729,TSS45040,TSS54098,TSS62586,TSS74285,TSS8285,TSS83925	15:76723984-76818170	0.213734577	4.371089731	3.5154993	0.060797335	0.852888109
ENSMUSG00000045932	Ifit2	TSS60909,TSS62907	19:34550693-34576419	-0.195519497	5.239150177	3.514082478	0.060849341	0.852888109
ENSMUSG00000053835	H2-T24	TSS49034,TSS56221	17:35994452-36129692	-0.334078353	2.220504354	3.512808139	0.060896156	0.852888109
ENSMUSG00000036817	Sun1	TSS11112,TSS11901,TSS12650,TSS19137,TSS22558,TSS27263,TSS27575,TSS28774,TSS41464,TSS51158,TSS63808,TSS63810,TSS64442,TSS66351,TSS73426,TSS73429,TSS78201,TSS81340,TSS82603,TSS8864	5:139200636-139249840	0.123247891	6.462301096	3.512653447	0.060901842	0.852888109
ENSMUSG00000037315	Phf16	TSS28654,TSS35717,TSS51239	X:20425687-20519939	0.20883406	4.252213543	3.509535969	0.061016543	0.852888109
ENSMUSG00000028893	Sesn2	TSS32212	4:132492031-132510501	-0.31164585	2.780956047	3.509423349	0.061020691	0.852888109
ENSMUSG00000014453	Blk	TSS57403	14:63372836-63417187	-0.41948115	1.352061521	3.509180303	0.061029644	0.852888109
ENSMUSG00000034959	5031414D18Rik	TSS29848	14:75016026-75052532	-0.307555727	2.708864715	3.507024941	0.061109098	0.852888109
ENSMUSG00000095651	RP24-69M8.3	TSS81152	8:92326037-92356120	-0.40460757	2.344963603	3.504932901	0.061186324	0.852888109
ENSMUSG00000030111	A2m	TSS19610	6:121636172-121679237	0.265186643	3.840004913	3.50475763	0.061192799	0.852888109
ENSMUSG00000021025	Nfkbia	TSS60701	12:55489410-55492647	0.187701503	4.804081541	3.503834751	0.061226903	0.852888109
ENSMUSG00000042675	Ypel3	TSS20315,TSS26871,TSS33186,TSS39375,TSS53605,TSS55541,TSS71747,TSS71749,TSS85067,TSS9382	7:126776954-126780514	0.32244197	3.32321115	3.50225378	0.061285373	0.852888109
ENSMUSG00000000563	Atp5f1	TSS37145,TSS63472,TSS74984,TSS85710,TSS9115	3:105942697-105987423	-0.123337455	9.186026228	3.499823468	0.061375371	0.853240539
ENSMUSG00000003549	Ercc1	TSS13809,TSS181,TSS18318,TSS28321,TSS42371,TSS44752,TSS44758,TSS58986,TSS64092,TSS64552	7:19344777-19356524	-0.193017382	4.391154892	3.492323987	0.061653976	0.855459404
ENSMUSG00000037089	Slc35b2	TSS55107	17:45563963-45567669	0.160749242	5.236814724	3.492037045	0.061664663	0.855459404
ENSMUSG00000041115	Iqsec2	TSS39139,TSS41368,TSS47051	X:152144267-152225236	-0.152640919	4.707993782	3.482864473	0.062007318	0.859309396
ENSMUSG00000084846	A730011C13Rik	TSS21478,TSS82218	3:94974730-95015448	0.348942716	2.389196595	3.479534007	0.062132234	0.859402132
ENSMUSG00000071317	Bves	TSS72187	10:45335761-45369708	-0.155143691	7.657544242	3.477789538	0.062197771	0.859402132
ENSMUSG00000037313	Tacc3	TSS49556,TSS67130,TSS67213,TSS69469,TSS7499,TSS83043	5:33658127-33678995	-0.130392781	6.204634436	3.476706766	0.062238486	0.859402132
ENSMUSG00000036880	Acaa2	TSS9797	18:74779196-74806207	0.126959069	9.003505999	3.474269287	0.062330245	0.859402132
ENSMUSG00000021040	Slirp	TSS32827,TSS55176,TSS64859,TSS67203	12:87425839-87472299	-0.182593325	5.332289029	3.472698849	0.062389441	0.859402132
ENSMUSG00000087579	1500017E21Rik	TSS26901,TSS37451,TSS40861,TSS41631,TSS42839,TSS43189,TSS73587,TSS79410	19:36554638-36705641	-0.177385479	4.903209883	3.472283327	0.062405113	0.859402132
ENSMUSG00000049106	Dcaf5	TSS74429	12:80335846-80436601	0.118653198	6.168123275	3.46897837	0.062529919	0.859402132
ENSMUSG00000051705	Senp8	TSS70217	9:59734258-59750649	0.241077864	3.778626189	3.467604095	0.062581894	0.859402132
ENSMUSG00000026628	Atf3	TSS53157,TSS64651	1:191170295-191183340	-0.465566663	4.344115795	3.467118338	0.062600277	0.859402132
ENSMUSG00000025260	Hsd17b10	TSS25403,TSS6099,TSS73364	X:152001844-152004442	-0.123217775	6.498889117	3.464398551	0.062703307	0.859671528
ENSMUSG00000026627	Tmem206	TSS11482	1:191325911-191350914	0.217800545	3.538363133	3.461402666	0.062817006	0.859671528
ENSMUSG00000027424	8430406I07Rik	TSS29544,TSS63937,TSS82183	2:144250122-144281227	-0.161602573	4.652879044	3.459917745	0.062873443	0.859671528
ENSMUSG00000040387	Klhl32	TSS35208,TSS40689,TSS6348,TSS73002,TSS81938,TSS82311	4:24612553-24851124	0.294832238	2.810364378	3.459626905	0.062884503	0.859671528
ENSMUSG00000045441	Gprin3	TSS49372	6:59352460-59426290	0.418882726	1.789559418	3.457541024	0.062963886	0.859671528
ENSMUSG00000031626	Sorbs2	TSS11113,TSS13745,TSS21952,TSS24645,TSS2728,TSS2732,TSS30093,TSS31348,TSS33402,TSS35444,TSS35657,TSS37333,TSS41471,TSS43920,TSS47204,TSS4800,TSS55636,TSS55743,TSS55745,TSS55982,TSS59891,TSS6019,TSS61206,TSS69631,TSS73824,TSS75771,TSS77096,TSS8527	8:45507787-45827906	-0.168684549	9.646898761	3.456307865	0.063010867	0.859671528
ENSMUSG00000070509	Rgma	TSS34989,TSS44193,TSS55374	7:73314002-73419899	-0.433973411	1.786948425	3.453285077	0.063126188	0.860321706
ENSMUSG00000072893	4933439C10Rik	TSS17491,TSS27171,TSS51796,TSS52600,TSS63682,TSS71157	11:59485519-59526751	0.244354882	3.070361656	3.445086699	0.063440093	0.860321706
ENSMUSG00000021835	Bmp4	TSS17609,TSS56816,TSS81486	14:46379413-46390669	0.290318869	2.489742949	3.444337992	0.063468843	0.860321706
ENSMUSG00000030031	Kbtbd8	TSS11358,TSS38940,TSS51183,TSS81624	6:95114016-95129718	-0.486301353	1.711146518	3.443461723	0.063502509	0.860321706
ENSMUSG00000042363	Lgalsl	TSS19117,TSS36998,TSS73405	11:20823575-20831056	0.135738041	5.894751427	3.441822833	0.063565525	0.860321706
ENSMUSG00000027230	Creb3l1	TSS33401	2:91982327-92024502	-0.368364644	1.697332824	3.441651866	0.063572103	0.860321706
ENSMUSG00000085802	Gm16059	TSS56076	15:79417855-79443919	0.306638033	2.624519459	3.441060723	0.063594852	0.860321706
ENSMUSG00000044072	Eml6	TSS30258,TSS36174,TSS44180,TSS60899,TSS61960,TSS66745,TSS72660	11:29692946-30026033	0.25313081	3.511525421	3.43880963	0.063681559	0.860321706
ENSMUSG00000020526	Znhit3	TSS16642,TSS25711,TSS55195,TSS82472	11:84876314-84916366	-0.213256662	3.563251298	3.436727821	0.063761858	0.860321706
ENSMUSG00000064023	Klk8	TSS48111	7:43690417-43803822	0.308213102	2.79844561	3.436160304	0.063783767	0.860321706
ENSMUSG00000067924	Cxx1b	TSS7866	X:53669177-53670408	-0.183040938	4.070659958	3.431889986	0.063948879	0.860321706
ENSMUSG00000040428	Plekha4	TSS27106,TSS40504,TSS55594,TSS66924,TSS71420,TSS77342,TSS8975	7:45526329-45554229	-0.454758081	1.182623887	3.431723415	0.063955329	0.860321706
ENSMUSG00000032060	Cryab	TSS29106	9:50752757-50756633	-0.126573638	8.74786003	3.431471246	0.063965094	0.860321706
ENSMUSG00000021619	Atg10	TSS43108	13:90935348-91223987	0.251996674	3.941323536	3.430686351	0.0639955	0.860321706
ENSMUSG00000026229	Psmd1	TSS1690,TSS4844,TSS50263,TSS74858,TSS76992,TSS79861	1:86064386-86301375	-0.118057801	7.508824407	3.429623981	0.06403668	0.860321706
ENSMUSG00000025354	Dnajc14	TSS78464	10:128805675-128821631	0.126522387	5.847564094	3.426441672	0.064160201	0.861104306
ENSMUSG00000003444	Med29	TSS28519	7:28386145-28392708	-0.198906356	4.217728607	3.422262439	0.064322804	0.862409305
ENSMUSG00000085024	C230035I16Rik	TSS21831,TSS45020	13:23427974-23431022	0.365430698	1.78562115	3.41937156	0.064435538	0.863043709
ENSMUSG00000042271	Nxt2	TSS19487,TSS1962,TSS20001,TSS2066,TSS30008	X:142226769-142239692	-0.216724413	3.501296113	3.41506114	0.06460402	0.863314771
ENSMUSG00000018507	Trpv2	TSS32428,TSS45960,TSS47050,TSS48661,TSS82799	11:62574485-62600515	-0.269634704	2.833285131	3.414865019	0.064611697	0.863314771
ENSMUSG00000030787	Lyve1	TSS34596	7:110850606-110862953	0.193196262	4.456041265	3.412111702	0.064719577	0.863314771
ENSMUSG00000092392	Gm20546	TSS56829	17:36248635-36253679	0.452911693	1.474036697	3.410762726	0.064772502	0.863314771
ENSMUSG00000046679	C87436	TSS43512,TSS51224,TSS56362,TSS60877,TSS83080,TSS85680	6:86438373-86480830	0.199920957	4.094735797	3.410489799	0.064783215	0.863314771
ENSMUSG00000055022	Cntn1	TSS31407,TSS5199,TSS80945	15:92051164-92341967	-0.355562102	1.797857406	3.405923409	0.064962745	0.863314771
ENSMUSG00000034354	Mtmr3	TSS22629,TSS47585,TSS53687,TSS66387,TSS71246,TSS73025	11:4480867-4594863	0.113233475	7.320153178	3.40489821	0.065003125	0.863314771
ENSMUSG00000039835	Nhsl1	TSS1040,TSS25120,TSS2860,TSS42203,TSS45613,TSS5502	10:18390321-18533892	-0.137889632	6.238265866	3.404774143	0.065008013	0.863314771
ENSMUSG00000054966	Ifltd1	TSS13027,TSS40552,TSS46680,TSS5042,TSS76187,TSS8137	6:145365133-145614319	0.357248607	2.496764743	3.403843052	0.065044712	0.863314771
ENSMUSG00000048442	2210020M01Rik	TSS11225,TSS32965,TSS34998	11:115861611-115966725	-0.152433412	5.199714852	3.399001381	0.065235902	0.864208126
ENSMUSG00000062198	2700097O09Rik	TSS1616,TSS37637,TSS51889	12:55045660-55080110	-0.210754029	4.038441619	3.398046299	0.065273688	0.864208126
ENSMUSG00000064382	SNORA63	TSS29009	16:23107443-23127737	-0.254130736	5.67605374	3.397166007	0.065308535	0.864208126
ENSMUSG00000029650	Slc46a3	TSS71296,TSS79321	5:147878436-147894815	-0.301989236	2.326863619	3.393175169	0.065466766	0.865294171
ENSMUSG00000053768	Chchd3	TSS13399,TSS16263,TSS16270,TSS16641,TSS22945,TSS39687,TSS49947,TSS64743,TSS73427,TSS848	6:32790975-33060260	-0.119054915	8.160588454	3.391789976	0.065521782	0.865294171
ENSMUSG00000027496	Aurka	TSS1153,TSS17007,TSS48992,TSS80873	2:172356189-172370535	-0.128540886	5.816663129	3.389785067	0.0656015	0.865473545
ENSMUSG00000030317	Timp4	TSS69584	6:115134901-115282626	-0.592018613	1.476473511	3.388150553	0.065666567	0.865473545
ENSMUSG00000031924	Cyb5b	TSS56858	8:107150660-107187470	-0.12439317	7.023878823	3.38460904	0.065807784	0.866469161
ENSMUSG00000040280	Ndufa4l2	TSS45472	10:127514938-127522444	0.203458744	4.100776059	3.381826447	0.065918967	0.867067733
ENSMUSG00000090990	Gm17197	TSS82721	19:56287136-56390037	-0.332050211	2.449570932	3.376634236	0.066126967	0.86893733
ENSMUSG00000026034	Clk1	TSS16357,TSS333,TSS36073,TSS48211,TSS52537,TSS53299,TSS74456	1:58410188-58424066	0.196404077	7.529437764	3.372911066	0.066276549	0.870036328
ENSMUSG00000037287	Tbcel	TSS13840,TSS34464,TSS4144,TSS44020,TSS71542,TSS81257,TSS82598	9:42412315-42507809	0.195251783	4.126396312	3.371079482	0.066350267	0.870138243
ENSMUSG00000027435	Cd93	TSS61976	2:148436639-148443563	0.12524674	8.942968935	3.365313467	0.066582912	0.872322097
ENSMUSG00000058013	Sep-11	TSS63159	5:93093456-93174958	0.112776337	7.526889026	3.363269084	0.066665606	0.872539034
ENSMUSG00000021432	Slc35b3	TSS59681,TSS75278	13:38932139-38966299	0.226540885	3.452619532	3.357502734	0.066899446	0.874731807
ENSMUSG00000028766	Alpl	TSS10146,TSS18625,TSS22569,TSS22856,TSS23278,TSS3701,TSS44672,TSS60901	4:137741732-137796384	-0.533517063	1.227856104	3.349277627	0.067234512	0.876709802
ENSMUSG00000036983	Tfb1m	TSS22094	17:3326572-3557713	-0.237515032	3.519756742	3.344300707	0.067438128	0.876709802
ENSMUSG00000031672	Got2	TSS17695,TSS84352	8:95864133-95888547	-0.129126673	8.860768944	3.343124542	0.067486343	0.876709802
ENSMUSG00000052374	Actn2	TSS12407,TSS78345,TSS79799	13:12269425-12340760	-0.136336028	10.70754161	3.343122759	0.067486416	0.876709802
ENSMUSG00000024190	Dusp1	TSS28272,TSS33514,TSS57048	17:26505589-26508519	-0.202938699	4.93062893	3.341008929	0.067573163	0.876709802
ENSMUSG00000031755	Bbs2	TSS53507,TSS58258,TSS78565	8:94067953-94098811	0.184198472	4.2746907	3.338753054	0.06766587	0.876709802
ENSMUSG00000022337	Emc2	TSS71571	15:43477228-43527777	-0.111483447	6.698483586	3.337220789	0.067728918	0.876709802
ENSMUSG00000043909	Trp53bp1	TSS10892,TSS13202,TSS1354,TSS177,TSS27346,TSS29087,TSS33257,TSS38484,TSS47372,TSS4837,TSS53212,TSS53673,TSS60987,TSS64034,TSS69278,TSS70204,TSS78627,TSS79241,TSS81456	2:121158272-121271407	0.122320586	7.283230812	3.335360608	0.067805542	0.876709802
ENSMUSG00000010066	Cacna2d2	TSS1269,TSS26884,TSS46589,TSS54289,TSS70212,TSS82740	9:107399611-107529346	0.228336899	4.304122898	3.334914577	0.067823929	0.876709802
ENSMUSG00000036752	Tubb4b	TSS37201,TSS51022	2:25218744-25224702	-0.135553805	7.506577475	3.334727367	0.067831648	0.876709802
ENSMUSG00000037185	Krt80	TSS77462	15:101349570-101370125	-0.351573031	2.726561171	3.334361252	0.067846746	0.876709802
ENSMUSG00000093587	Gm20554	TSS2857	13:72617919-72628564	0.326985224	2.79468289	3.33271027	0.067914875	0.876709802
ENSMUSG00000028414	Fktn	TSS15551,TSS38804,TSS6858	4:53713997-53765785	-0.176138179	5.85637641	3.330549007	0.068004171	0.876709802
ENSMUSG00000078495	Gm13157	TSS24901,TSS46964	4:147753973-147809840	0.215062502	3.612519234	3.328713937	0.068080089	0.876709802
ENSMUSG00000050944	Efcab5	TSS22024,TSS38904,TSS49188,TSS56400,TSS61807	11:77089914-77188968	0.404732063	1.418562819	3.326366194	0.068177349	0.876709802
ENSMUSG00000029333	Rasgef1b	TSS38158,TSS56973,TSS61033	5:99217425-99252927	0.216350314	5.076203114	3.324733213	0.068245086	0.876709802
ENSMUSG00000075592	Nynrin	TSS14221,TSS86132	14:55854035-55874735	0.167568777	5.396590512	3.324626642	0.068249509	0.876709802
ENSMUSG00000056004	9330182L06Rik	TSS13126,TSS24210,TSS35509,TSS35511,TSS3615,TSS49878,TSS67507	5:9266117-9481825	0.515455529	1.084172338	3.322152344	0.068352288	0.876709802
ENSMUSG00000007880	Arid1a	TSS26190,TSS47171,TSS69456,TSS740,TSS83685	4:133679007-133756769	-0.145900376	6.291051519	3.315252839	0.068639762	0.876709802
ENSMUSG00000034459	Ifit1	TSS2898	19:34640870-34650009	-0.598808277	2.048090617	3.314044529	0.06869024	0.876709802
ENSMUSG00000062762	Ei24	TSS4446,TSS50828	9:36767886-36797393	-0.114281038	6.377821493	3.309297152	0.06888895	0.876709802
ENSMUSG00000009207	Lnp	TSS20321,TSS21259,TSS28189,TSS40500,TSS41524,TSS42667,TSS56024,TSS57072,TSS65018,TSS73479,TSS73674,TSS9583	2:74520290-74584544	-0.153299391	5.364256471	3.30553923	0.069046681	0.876709802
ENSMUSG00000033308	Dpyd	TSS34523,TSS4162,TSS61787,TSS74435,TSS7511	3:118562128-119432918	0.323621567	2.38479639	3.30503951	0.069067684	0.876709802
ENSMUSG00000040327	Cul9	TSS65760	17:46442447-46831413	0.248921679	4.110634615	3.303524507	0.069131404	0.876709802
ENSMUSG00000002910	Arrdc2	TSS71741	8:70835154-70839720	0.330344682	2.309928206	3.300245466	0.069269531	0.876709802
ENSMUSG00000030793	Pycard	TSS32720	7:127992102-127993867	-0.239640626	4.172078197	3.299008913	0.069321697	0.876709802
ENSMUSG00000031843	Mphosph6	TSS85147	8:117791644-117801929	-0.221426757	3.475587832	3.295726112	0.069460391	0.876709802
ENSMUSG00000054717	Hmgb2	TSS82444	8:57511842-57515999	-0.144438869	6.478629738	3.294417708	0.069515752	0.876709802
ENSMUSG00000034675	Dbn1	TSS17493,TSS57320,TSS64430,TSS64436,TSS65505,TSS72859,TSS82421,TSS84875	13:55473428-55488111	0.20054494	5.137761742	3.292615007	0.069592105	0.876709802
ENSMUSG00000021038	Vipas39	TSS17072,TSS24446	12:87238874-87266286	0.125001606	5.861283801	3.289545246	0.06972233	0.876709802
ENSMUSG00000020644	Id2	TSS4252	12:25093800-25096092	0.207661022	4.929145908	3.285947843	0.069875272	0.876709802
ENSMUSG00000057123	Gja5	TSS777	3:97032415-97053634	0.290302279	6.407020599	3.284723857	0.069927391	0.876709802
ENSMUSG00000044715	4933433P14Rik	TSS66963	12:105685351-105703047	0.233042453	3.891311047	3.283388558	0.069984297	0.876709802
ENSMUSG00000064945	Y_RNA	TSS36180	6:47781623-47781725	-0.375097737	7.160051047	3.282495363	0.07002239	0.876709802
ENSMUSG00000040964	Arhgef10l	TSS14363,TSS21496,TSS37878,TSS45847,TSS46452,TSS48444,TSS50628,TSS60134,TSS62977,TSS73343,TSS76685	4:140514484-140666012	-0.198104147	5.244442148	3.281954782	0.070045455	0.876709802
ENSMUSG00000027219	Slc28a2	TSS18934,TSS53098,TSS68430,TSS69034,TSS79697	2:122426476-122461137	-0.352160883	2.548276035	3.280563918	0.070104837	0.876709802
ENSMUSG00000097727	AC165259.1	TSS59212,TSS81667	17:45734505-45788594	0.457377671	1.106442667	3.280300354	0.070116096	0.876709802
ENSMUSG00000032279	Idh3a	TSS51390	9:54586510-54604661	-0.120666539	9.285901693	3.278862602	0.070177548	0.876709802
ENSMUSG00000011427	Zfp790	TSS47791	7:29816071-29832042	0.169243523	5.047916713	3.278801078	0.070180179	0.876709802
ENSMUSG00000046110	Serinc4	TSS31918,TSS35862,TSS44620,TSS44622,TSS63660	2:121439009-121458672	0.1227944	6.3637653	3.275956387	0.07030194	0.876709802
ENSMUSG00000049537	Tecrl	TSS19113,TSS35083	5:83278144-83355195	-0.158725953	5.372821858	3.275914875	0.070303718	0.876709802
ENSMUSG00000002266	Zim1	TSS2505,TSS56490	7:6675442-6696450	0.293892774	4.351900924	3.273319467	0.07041501	0.876709802
ENSMUSG00000020163	Uqcr11	TSS14107,TSS36144,TSS70592	10:80402996-80406830	-0.155068456	8.027290867	3.272499849	0.070450194	0.876709802
ENSMUSG00000028948	Nol9	TSS37130,TSS37132,TSS5233,TSS81677	4:152039320-152061494	0.176665147	4.855664679	3.271418953	0.070496623	0.876709802
ENSMUSG00000035299	Mid1	TSS29028,TSS34781,TSS39165,TSS45977,TSS52327,TSS59053,TSS59653,TSS73963,TSS83207	X:169685198-170005736	-0.236630687	4.041272009	3.26577331	0.070739663	0.876709802
ENSMUSG00000020705	Ddx42	TSS15292,TSS42217	11:106216925-106249139	0.114361418	6.795051415	3.264924656	0.070776274	0.876709802
ENSMUSG00000030291	Med21	TSS40939,TSS54670,TSS8794,TSS9993	6:146602351-146650602	-0.155692192	5.235440319	3.264492862	0.070794909	0.876709802
ENSMUSG00000054277	Arfgap3	TSS70781	15:83299739-83350247	0.152974643	5.356421347	3.262011807	0.07090209	0.876709802
ENSMUSG00000024099	Ndufv2	TSS17918,TSS37843,TSS50123,TSS8361	17:66078794-66101559	-0.141201465	8.316733145	3.261719149	0.070914744	0.876709802
ENSMUSG00000022684	Bfar	TSS11016,TSS16406,TSS36805,TSS41030,TSS41267,TSS44967,TSS78959	16:13671857-13703612	0.133463275	5.820661754	3.261628563	0.070918661	0.876709802
ENSMUSG00000020524	Gria1	TSS18762,TSS20239,TSS23522,TSS43630,TSS62898	11:57011386-57330244	0.299109787	3.453489788	3.259975658	0.07099018	0.876709802
ENSMUSG00000036570	Fxyd1	TSS5311,TSS80721	7:31051680-31055656	-0.110963783	6.826145724	3.259351429	0.07101721	0.876709802
ENSMUSG00000086949	Gm13066	TSS5629	4:149518235-149567790	0.234901561	3.453107693	3.258585815	0.071050377	0.876709802
ENSMUSG00000064343	mt-Tq	TSS41623	MT:2750-3842	0.318766719	3.071206119	3.257151583	0.071112553	0.876709802
ENSMUSG00000035840	Lysmd3	TSS45930	13:81657805-81671888	0.154381018	5.21498571	3.256842442	0.071125962	0.876709802
ENSMUSG00000020256	Aldh1l2	TSS22556,TSS27064,TSS58002,TSS60283,TSS73088,TSS77218,TSS7754	10:83487449-83534140	0.152206874	5.949709059	3.25438958	0.071232455	0.876709802
ENSMUSG00000031174	Rpgr	TSS18390,TSS36682,TSS53664,TSS6664,TSS81180	X:10037976-10216920	0.256056614	3.845567041	3.254018887	0.071248564	0.876709802
ENSMUSG00000096463	Gm17312	TSS53056	14:73661224-73662721	-0.285244525	3.922022667	3.253142386	0.071286668	0.876709802
ENSMUSG00000028403	Zdhhc21	TSS24483,TSS37781,TSS48653,TSS49235,TSS76828,TSS8789	4:82798737-82859958	-0.155440205	6.560159056	3.252778183	0.071302508	0.876709802
ENSMUSG00000034681	Rnps1	TSS22360	17:24414674-24425895	-0.161074855	5.520006571	3.252577164	0.071311252	0.876709802
ENSMUSG00000058298	Mcm9	TSS42303	10:53536328-53630439	0.176171216	4.733401272	3.252383553	0.071319675	0.876709802
ENSMUSG00000064280	Ccdc146	TSS11248,TSS25899,TSS4794,TSS85089	5:21292960-21424677	0.322315741	2.238674736	3.250778562	0.07138954	0.876709802
ENSMUSG00000026638	Irf6	TSS26112,TSS84325	1:193153111-193201703	0.242789537	3.071231472	3.249272511	0.071455166	0.876709802
ENSMUSG00000031799	Tpm4	TSS52867,TSS75382	8:72134974-72160855	0.109261387	8.131059039	3.248514402	0.071488224	0.876709802
ENSMUSG00000000031	H19	TSS20616,TSS24702,TSS2883,TSS44987,TSS85444	7:142575528-142578143	0.182983509	11.92070645	3.248116683	0.071505574	0.876709802
ENSMUSG00000028066	Pmf1	TSS23911	3:88394142-88410316	-0.254947327	4.376589952	3.246544778	0.07157419	0.876709802
ENSMUSG00000025651	Uqcrc1	TSS72559	9:108936647-108949640	-0.118989312	9.473416488	3.245587008	0.071616033	0.876709802
ENSMUSG00000031333	Abcb7	TSS47720,TSS47841	X:104280656-104413856	-0.126156023	6.793962255	3.245438002	0.071622545	0.876709802
ENSMUSG00000097059	CT010439.1	TSS26348	13:48968286-48972031	0.377297217	1.712915911	3.245131178	0.071635956	0.876709802
ENSMUSG00000018076	Med13l	TSS69419	5:118560718-118765435	0.132512838	6.132641476	3.241254894	0.07180562	0.8772189
ENSMUSG00000058290	Espl1	TSS4073	15:102296292-102324356	-0.179031437	5.526903585	3.241142699	0.071810537	0.8772189
ENSMUSG00000028664	Ephb2	TSS39450,TSS53556,TSS536,TSS57418,TSS79571,TSS79658	4:136647538-136835988	-0.367724811	2.424829294	3.23748932	0.07197085	0.877751057
ENSMUSG00000049672	Zfp161	TSS13934,TSS27372,TSS9947	17:69383049-69390750	0.198466873	4.86336527	3.237045009	0.071990373	0.877751057
ENSMUSG00000027995	Tlr2	TSS15757	3:83836272-83841767	0.405650752	1.550594458	3.235604794	0.072053695	0.877751057
ENSMUSG00000025499	Hras1	TSS13751,TSS13752,TSS20958,TSS44319,TSS48662,TSS61423,TSS61605	7:141189104-141194005	-0.14311512	5.75015257	3.232944107	0.072170834	0.878366984
ENSMUSG00000002147	Stat6	TSS22393,TSS336,TSS36058,TSS51786,TSS58593	10:127642985-127701049	0.136081142	6.396093826	3.228568477	0.072363919	0.879168345
ENSMUSG00000030086	Chchd6	TSS82035	6:89383145-89595652	-0.254363042	3.823471088	3.228431881	0.072369956	0.879168345
ENSMUSG00000026349	Ccnt2	TSS15360,TSS50267	1:127774163-127808061	-0.122924397	7.252357902	3.220214954	0.072734078	0.879506959
ENSMUSG00000026821	Ralgds	TSS18166,TSS19083,TSS23201,TSS43175,TSS43902,TSS50854,TSS51551,TSS69530,TSS71798,TSS80203	2:28513124-28553081	0.195920148	4.66366814	3.220043142	0.072741713	0.879506959
ENSMUSG00000029804	Herc3	TSS1889,TSS38453,TSS41996,TSS46895,TSS47274,TSS47492,TSS47684,TSS64923	6:58831464-58920398	-0.119427422	7.322815821	3.21849302	0.072810632	0.879506959
ENSMUSG00000035629	1700021K19Rik	TSS2230,TSS48087,TSS48180,TSS50670,TSS65602,TSS70515,TSS70516,TSS77113,TSS85285	16:32821702-32908963	-0.120646027	6.730658621	3.218198608	0.07282373	0.879506959
ENSMUSG00000002900	Lamb1	TSS12522,TSS25958,TSS27376,TSS34633,TSS37712,TSS40185,TSS6695,TSS74594	12:31265233-31329644	0.110372511	9.555616924	3.217177496	0.072869176	0.879506959
ENSMUSG00000005069	Pex5	TSS11071,TSS13997,TSS23853,TSS32445,TSS48473,TSS7149,TSS7535	6:124396815-124415067	0.144968874	5.196696658	3.216536915	0.072897702	0.879506959
ENSMUSG00000024002	Brd4	TSS17655,TSS23874,TSS45433,TSS63709,TSS73182	17:32196273-32284722	-0.151818247	4.805152134	3.216004115	0.072921437	0.879506959
ENSMUSG00000049134	Nrap	TSS25082,TSS44101,TSS57772,TSS66415,TSS7178	19:56287136-56390037	-0.121890724	9.259026257	3.215786226	0.072931146	0.879506959
ENSMUSG00000019790	Stxbp5	TSS11051,TSS18590,TSS28493,TSS47692,TSS49604,TSS51731,TSS5424,TSS71208,TSS80752	10:9755546-9901079	-0.151093769	5.110002325	3.213878765	0.0730162	0.879728521
ENSMUSG00000024854	Pold4	TSS28988	19:4231898-4233631	0.257702095	2.85993126	3.211786023	0.073109638	0.880042869
ENSMUSG00000032519	Slc25a38	TSS14492,TSS16750,TSS28424,TSS39110,TSS39312,TSS50684	9:120110373-120124504	-0.236270383	3.783856344	3.210308137	0.073175701	0.880042869
ENSMUSG00000022892	App	TSS37185	16:84954439-85173707	0.121126679	7.989221416	3.202562885	0.073522971	0.882920804
ENSMUSG00000021754	Map3k1	TSS52598,TSS59910,TSS72872,TSS84986,TSS8628	13:111746427-111808993	0.120576619	6.162478026	3.201987284	0.073548849	0.882920804
ENSMUSG00000035000	Dpp4	TSS10937,TSS30590,TSS38970,TSS46894,TSS64569,TSS71006	2:62330072-62470913	0.175831653	4.578799377	3.197765092	0.073738973	0.884398428
ENSMUSG00000042737	Dpm3	TSS11739,TSS57219,TSS6698	3:89259357-89267079	-0.464134728	2.261002835	3.193786486	0.073918611	0.885358627
ENSMUSG00000093726	Gm20667	TSS11578	14:67673176-67675106	-0.302203757	2.317318015	3.193020543	0.073953248	0.885358627
ENSMUSG00000070056	Mfhas1	TSS17288,TSS42884	8:35582571-35679449	-0.118959401	6.857057664	3.189387407	0.074117782	0.886523928
ENSMUSG00000071604	Fam189a2	TSS57911	19:23972750-24031019	-0.149833354	6.102366928	3.183962713	0.074364181	0.887636994
ENSMUSG00000063049	Ing2	TSS31824,TSS62797,TSS85244	8:47667177-47677055	0.223599679	3.441239732	3.183346581	0.074392222	0.887636994
ENSMUSG00000033809	Alg3	TSS18465,TSS28130,TSS40831,TSS53323	16:20605450-20610768	-0.266506569	2.951294785	3.182001041	0.0744535	0.887636994
ENSMUSG00000027765	P2ry1	TSS32374	3:61002794-61008979	-0.301020162	3.10566653	3.177694532	0.074649988	0.887636994
ENSMUSG00000085396	6720401G13Rik	TSS35817,TSS3905,TSS58126,TSS9246	X:50555743-50635321	0.175670707	4.802129773	3.17647396	0.074705779	0.887636994
ENSMUSG00000035469	Rcbtb1	TSS18542,TSS21340,TSS27516,TSS30716,TSS34076,TSS48996,TSS59521,TSS67193,TSS71460,TSS8323,TSS84096	14:59201208-59237265	0.15864282	4.560597681	3.175764227	0.074738241	0.887636994
ENSMUSG00000097073	AC163666.1	TSS22578,TSS58765	9:88595324-88599516	-0.184831483	4.635458044	3.171553945	0.074931122	0.887636994
ENSMUSG00000024240	Epc1	TSS35244,TSS7017,TSS8489	18:6435950-6516108	-0.133537005	5.950557077	3.169707391	0.075015885	0.887636994
ENSMUSG00000045822	Zswim3	TSS1739	2:164805097-164822130	-0.30969301	2.471328877	3.169671044	0.075017554	0.887636994
ENSMUSG00000089726	Mir17hg	TSS49619,TSS70704	14:115042878-115046727	0.179411997	4.194165087	3.168880126	0.075053892	0.887636994
ENSMUSG00000034928	Rnf44	TSS19947,TSS20030,TSS29658,TSS3220,TSS32949,TSS35941,TSS43851,TSS5317,TSS53873,TSS53933,TSS53936,TSS59359,TSS64804,TSS71070,TSS71551,TSS77533,TSS81888	13:54679398-54693907	-0.176983711	4.871995831	3.168336726	0.07507887	0.887636994
ENSMUSG00000039221	Rpl22l1	TSS36892	3:28805435-28807352	-0.174475835	4.722995212	3.164401989	0.075259994	0.887636994
ENSMUSG00000096243	U4	TSS74793	5:115489458-115489599	-0.281697844	6.120441575	3.164164824	0.075270926	0.887636994
ENSMUSG00000033767	D930015E06Rik	TSS17256	3:83898286-84040161	0.126314706	5.765788607	3.163998672	0.075278586	0.887636994
ENSMUSG00000051224	Tceanc	TSS27472,TSS37127,TSS51241	X:166499811-166518567	0.223716241	3.39117394	3.163218367	0.07531457	0.887636994
ENSMUSG00000026740	Dnajc1	TSS28991,TSS33745,TSS35710,TSS37716,TSS47505,TSS4841,TSS4842,TSS51316,TSS77029,TSS83211	2:18054192-18392830	-0.127568973	5.751094758	3.163003199	0.075324496	0.887636994
ENSMUSG00000088088	RNase_MRP	TSS71361	4:43492787-43495921	-0.679054626	7.596835195	3.16235049	0.075354615	0.887636994
ENSMUSG00000020897	Aurkb	TSS21336,TSS34883,TSS39215,TSS41451,TSS48021,TSS73411,TSS76334,TSS78277	11:69045646-69051664	-0.155534501	5.242034801	3.151352008	0.075864081	0.889748099
ENSMUSG00000072966	Gprasp2	TSS12295,TSS40046,TSS40933,TSS46472,TSS46473,TSS48602,TSS5851,TSS69678,TSS76927,TSS83267	X:135839033-135844730	0.189411712	4.298386787	3.150686015	0.075895049	0.889748099
ENSMUSG00000020638	Cmpk2	TSS65343	12:26469203-26479835	-0.549032262	3.451659162	3.149169401	0.075965622	0.889748099
ENSMUSG00000032513	Gorasp1	TSS68561	9:119894894-120068283	0.1720771	5.045270798	3.148054915	0.076017527	0.889748099
ENSMUSG00000015759	Cnih	TSS37700	14:46775581-46788411	-0.147032255	6.194409767	3.147377307	0.076049105	0.889748099
ENSMUSG00000042501	Cpa6	TSS28795,TSS35323,TSS78921	1:10324719-10719945	-0.248223104	4.717823034	3.146289557	0.076099824	0.889748099
ENSMUSG00000020601	Trib2	TSS15355,TSS48341	12:15791726-15816877	-0.120383242	7.479438426	3.14492357	0.076163569	0.889748099
ENSMUSG00000074754	Gm561	TSS83056	2:144594053-144595366	-0.210813329	3.499573929	3.143763057	0.07621777	0.889748099
ENSMUSG00000097316	CAAA01201205.1	TSS43347	1:191997429-192151013	-0.354629264	2.273098782	3.143145896	0.076246611	0.889748099
ENSMUSG00000026409	Pfkfb2	TSS30552,TSS63236,TSS77087,TSS83997	1:130689042-130729253	0.140151373	5.883385611	3.142618222	0.07627128	0.889748099
ENSMUSG00000029708	Gcc1	TSS13581,TSS17698,TSS22302,TSS67892	6:28416090-28438622	0.178759925	4.235718245	3.141974519	0.076301384	0.889748099
ENSMUSG00000026571	Dcaf6	TSS23488	1:165329510-165460465	0.128344772	6.274150365	3.141082463	0.076343125	0.889748099
ENSMUSG00000033793	Atp6v1h	TSS9142	1:5083172-5162549	0.138285034	5.464820477	3.136831792	0.076542357	0.891282715
ENSMUSG00000036046	5031439G07Rik	TSS20069,TSS23148,TSS47982,TSS55193	15:84943935-84988551	0.138213801	5.580497104	3.130084456	0.076859759	0.89350514
ENSMUSG00000037972	Snn	TSS63783	16:11066297-11134650	0.115938199	6.45815177	3.129055182	0.076908301	0.89350514
ENSMUSG00000063060	Sox7	TSS30139	14:63943673-63950732	0.226164613	4.465513727	3.128459839	0.076936393	0.89350514
ENSMUSG00000078651	Aoc2	TSS18840,TSS82703	11:101325062-101329702	0.354268271	1.683104232	3.123648198	0.077163846	0.894847346
ENSMUSG00000028822	Tmem50a	TSS20618,TSS48080	4:134897848-134915024	0.157259377	5.483125214	3.121407086	0.077270033	0.894847346
ENSMUSG00000021820	Camk2g	TSS10666	14:20734874-20794088	0.128944443	7.000515564	3.120116441	0.077331257	0.894847346
ENSMUSG00000028126	Pip5k1a	TSS16530,TSS18637,TSS28200,TSS30336,TSS34544,TSS48730,TSS966	3:95058529-95106930	0.131321997	5.689262024	3.117705639	0.077445758	0.894847346
ENSMUSG00000030748	Il4ra	TSS73296	7:125552281-125579472	0.214477045	4.061238169	3.114552628	0.077595785	0.894847346
ENSMUSG00000007891	Ctsd	TSS10178,TSS12526,TSS6356	7:142325836-142388038	0.127018226	8.83712846	3.113681377	0.077637296	0.894847346
ENSMUSG00000020604	Arsg	TSS26187,TSS34046,TSS42760,TSS82457	11:109425945-109573330	0.331908578	2.397017292	3.113382553	0.077651539	0.894847346
ENSMUSG00000028331	5830415F09Rik	TSS10401,TSS55992,TSS65655	4:46376504-46389437	-0.219887629	3.117124845	3.113283081	0.077656281	0.894847346
ENSMUSG00000046280	She	TSS84677	3:89831369-89858834	0.175675005	5.431962044	3.113154459	0.077662413	0.894847346
ENSMUSG00000024862	Klc2	TSS27786,TSS27795,TSS33392,TSS40223,TSS42119,TSS45761,TSS60740,TSS78076,TSS84141	19:5107745-5118560	-0.161492109	4.909827784	3.110312289	0.077798042	0.895627899
ENSMUSG00000019916	P4ha1	TSS18438,TSS51534,TSS51541	10:59323295-59373304	0.127366943	6.618867709	3.104596983	0.078071552	0.896807593
ENSMUSG00000087819	SNORA48	TSS22530	10:111473191-111498142	-0.344000771	3.453574636	3.103670124	0.078116005	0.896807593
ENSMUSG00000030323	Ift122	TSS11818,TSS19570,TSS25004,TSS38962,TSS41967,TSS42023,TSS44148,TSS56984,TSS78420,TSS8077,TSS81587	6:115853469-115926699	0.132217045	5.446540837	3.101326026	0.078228551	0.896807593
ENSMUSG00000048865	Arhgap30	TSS32425	1:171388953-171410298	0.43149021	1.553808142	3.100491817	0.078268646	0.896807593
ENSMUSG00000069171	Nr2f1	TSS32620,TSS36974,TSS39620,TSS49738,TSS83555	13:78188972-78236564	0.527794893	1.159766624	3.09986161	0.07829895	0.896807593
ENSMUSG00000024897	Apba1	TSS48561	19:23758875-23949597	0.27553499	2.841024471	3.098033807	0.078386914	0.896807593
ENSMUSG00000054728	Phactr1	TSS11111,TSS12100,TSS18076,TSS33143,TSS34217,TSS42004,TSS48405,TSS4935,TSS53133,TSS55793,TSS58279,TSS60391,TSS60460,TSS65020,TSS69656	13:42680622-43138526	0.282700678	2.695928132	3.09792779	0.078392019	0.896807593
ENSMUSG00000059713	Rcan3	TSS43769,TSS75662,TSS8439	4:135412307-135433853	0.160428078	4.682766925	3.090992046	0.078726798	0.896807593
ENSMUSG00000020483	Dynll2	TSS14117,TSS69006,TSS74272,TSS76143	11:87979524-87987533	-0.114617875	6.805551837	3.090145086	0.078767785	0.896807593
ENSMUSG00000006014	Prg4	TSS39564,TSS78274	1:150361304-150466165	-0.234885867	2.916297906	3.087223649	0.078909338	0.896807593
ENSMUSG00000041268	Dmxl2	TSS23577,TSS3235,TSS36356,TSS4276,TSS48828,TSS56283,TSS75334,TSS9363	9:54365157-54501760	0.149079715	6.983837669	3.087218792	0.078909574	0.896807593
ENSMUSG00000042529	Kcnj12	TSS69233,TSS80145	11:61022563-61071131	-0.201579671	4.37864283	3.085064273	0.079014143	0.896807593
ENSMUSG00000021411	Pxdc1	TSS44722,TSS47809,TSS47960	13:34627839-34652681	0.188861419	4.314933365	3.084615331	0.079035952	0.896807593
ENSMUSG00000000266	Mid2	TSS11537,TSS17570,TSS19390,TSS55268,TSS60966	X:140664598-140767715	-0.115054969	6.157954645	3.08412995	0.079059537	0.896807593
ENSMUSG00000088948	SNORD97	TSS18822	7:111067984-111083030	-0.148588141	6.281247906	3.084025492	0.079064614	0.896807593
ENSMUSG00000044534	Ccbp2	TSS59337	9:121898463-121911064	0.400561303	3.323046822	3.081196541	0.079202238	0.896807593
ENSMUSG00000021763	BC067074	TSS14684,TSS78622,TSS9838	13:113317083-113379711	0.223047844	3.490255089	3.077717177	0.079371859	0.896807593
ENSMUSG00000016458	Wt1	TSS20850,TSS25901,TSS25991,TSS29062,TSS31050,TSS3414,TSS69375	2:105126528-105173616	0.237341336	4.295374784	3.077429135	0.079385918	0.896807593
ENSMUSG00000031753	Cog4	TSS15270,TSS17341,TSS27121,TSS30117,TSS40581,TSS41920,TSS55523,TSS5775,TSS60828,TSS73137,TSS73142	8:110810491-110972480	0.136345097	6.403077457	3.077272996	0.079393541	0.896807593
ENSMUSG00000032898	Fbxo21	TSS8331	5:117976769-118010191	0.137051628	6.127417235	3.076005734	0.079455436	0.896807593
ENSMUSG00000069302	Hist1h2ah	TSS31830	13:22035112-22035643	-0.659438227	1.342811952	3.0754378	0.079483191	0.896807593
ENSMUSG00000045664	Cdc42ep2	TSS48140	19:5917555-5924816	0.155868588	4.42254	3.073768411	0.079564836	0.896807593
ENSMUSG00000002984	Tomm40	TSS25888,TSS38910,TSS48811,TSS57854,TSS72574	7:19701312-19749573	-0.190620597	6.327066371	3.07346517	0.079579677	0.896807593
ENSMUSG00000038312	Edem2	TSS1156,TSS204,TSS55046,TSS83750	2:155701676-155729475	0.205992031	4.006839532	3.073122314	0.07959646	0.896807593
ENSMUSG00000038764	Ptpn3	TSS25418,TSS46620,TSS53554,TSS71561,TSS7458,TSS949	4:57190840-57307305	0.180955672	4.148098319	3.071792233	0.079661603	0.896807593
ENSMUSG00000029575	Mmab	TSS10054,TSS41541,TSS50697,TSS82593	5:114431033-114444059	-0.146449886	4.956302203	3.071663884	0.079667892	0.896807593
ENSMUSG00000001418	0610031J06Rik	TSS16474,TSS19442,TSS212,TSS32079,TSS64127,TSS79859,TSS9777	3:88325022-88334504	0.164326198	4.917015251	3.069875958	0.079755557	0.897029041
ENSMUSG00000033460	Armcx1	TSS17210,TSS41432,TSS41885,TSS49848,TSS69145,TSS70414,TSS71499,TSS7577	X:134717962-134721917	0.144799844	5.382308451	3.065677053	0.079961846	0.89858316
ENSMUSG00000025507	Lrdd	TSS40542,TSS48282,TSS54168,TSS54171,TSS54173,TSS5576,TSS70621,TSS70947	7:141438112-141444025	-0.274703051	3.050775901	3.06411712	0.08003863	0.898677567
ENSMUSG00000042712	Wbp5	TSS19831,TSS27400	X:136245078-136247139	0.10873319	7.343431355	3.062740004	0.080106482	0.898677567
ENSMUSG00000042717	Ppp1r3a	TSS8981	6:14713821-14755274	-0.173414499	7.084038742	3.056743026	0.080402683	0.899339041
ENSMUSG00000008450	Nutf2	TSS50032	8:105860633-105880402	-0.14969665	5.030205176	3.056669182	0.080406337	0.899339041
ENSMUSG00000097287	AC136746.1	TSS30623,TSS6051	5:143758324-143767130	0.432391408	1.538084798	3.056155471	0.080431767	0.899339041
ENSMUSG00000009376	Met	TSS15509,TSS22113,TSS22490,TSS32149,TSS49217,TSS61477,TSS65451	6:17463799-17573980	0.216994235	3.811459471	3.055968687	0.080441015	0.899339041
ENSMUSG00000025574	Tk1	TSS2419,TSS2858,TSS30094,TSS39803,TSS56189,TSS62123,TSS70318	11:117809667-117839908	-0.149722231	5.948417624	3.054651099	0.080506284	0.899339041
ENSMUSG00000024525	Impa2	TSS52454	18:67289252-67319146	0.153560089	5.350660775	3.048749203	0.080799348	0.901849241
ENSMUSG00000040859	Bsdc1	TSS28485,TSS33334,TSS47221,TSS54124,TSS68725,TSS75040,TSS85547	4:129461580-129488498	0.135651848	5.775605405	3.045357062	0.080968309	0.902971172
ENSMUSG00000047044	D030056L22Rik	TSS69395,TSS79001	19:18713192-18718428	-0.156210637	4.490553072	3.039059523	0.081282996	0.903910971
ENSMUSG00000024958	Gpr137	TSS13823,TSS51149,TSS63293,TSS74438	19:6938068-6951898	0.22440298	3.730299593	3.038966077	0.081287676	0.903910971
ENSMUSG00000040302	Rbm48	TSS19078,TSS37650,TSS40488,TSS53375,TSS85307	5:3571565-3647934	0.236338347	3.222025598	3.037161117	0.081378118	0.903910971
ENSMUSG00000053470	Kdm3a	TSS34109,TSS41704	6:71588973-71632905	0.141207147	6.741537447	3.036859755	0.081393229	0.903910971
ENSMUSG00000039615	Stub1	TSS77044	17:25794570-25985680	-0.139168113	6.622201363	3.036821425	0.081395151	0.903910971
ENSMUSG00000045538	Ddx28	TSS25721	8:105984943-106053840	0.238850239	3.57014612	3.034507165	0.081511299	0.9044395
ENSMUSG00000004328	Hif3a	TSS60525,TSS61468,TSS73067,TSS76667	7:17031506-17062427	0.12946836	6.099741145	3.032516163	0.081611366	0.904721908
ENSMUSG00000055480	Zfp458	TSS69845	13:67254917-67269068	-0.364481803	1.812666434	3.030045036	0.081735748	0.904721908
ENSMUSG00000032202	Rab27a	TSS33050	9:73044864-73097592	0.302797625	2.32307405	3.028711605	0.08180295	0.904721908
ENSMUSG00000068245	D14Ertd668e	TSS6153,TSS71853,TSS79602,TSS79603	14:59347406-59365470	-0.514866668	2.646964669	3.028550881	0.081811054	0.904721908
ENSMUSG00000029309	Sparcl1	TSS9478	5:104079110-104119687	0.167023399	9.040690278	3.026389554	0.081920119	0.905169284
ENSMUSG00000069312	Hist1h3h	TSS36527	13:21717627-21718115	-0.491368103	2.893071636	3.023461744	0.082068112	0.905723492
ENSMUSG00000090582	Gm17024	TSS52286	12:40201566-40248504	-0.342729536	1.772253311	3.021607589	0.082161984	0.905723492
ENSMUSG00000001419	Mef2d	TSS13305,TSS44075,TSS44780,TSS52149,TSS56049,TSS79290	3:88142371-88177785	-0.118698425	6.237661433	3.018420179	0.082323626	0.905723492
ENSMUSG00000061461	1810013D10Rik	TSS43174,TSS44648,TSS69796,TSS85780	5:53267105-53283510	-0.11846108	6.090404348	3.017023068	0.082394586	0.905723492
ENSMUSG00000064179	Tnnt1	TSS10061,TSS14158,TSS46194,TSS54707,TSS55870,TSS60032,TSS6333,TSS6522,TSS68506,TSS7433,TSS78069,TSS83309	7:4504569-4516382	0.285964535	5.296784601	3.015387945	0.082477718	0.905723492
ENSMUSG00000048148	Nwd1	TSS54041,TSS60988,TSS62198,TSS6702,TSS76810,TSS83186	8:72646710-72714746	0.292661274	2.33895866	3.01415396	0.082540516	0.905723492
ENSMUSG00000002012	Pnck	TSS6025,TSS68457,TSS71136,TSS75854,TSS84496	X:73655993-73660117	0.293323493	2.534432325	3.013146564	0.082591821	0.905723492
ENSMUSG00000021965	Ska3	TSS69573	14:57806560-57826163	-0.202457933	4.262711031	3.011527208	0.082674364	0.905723492
ENSMUSG00000086018	Gm13179	TSS46241	2:4017716-4614043	-0.422188116	1.168845545	3.01007891	0.082748263	0.905723492
ENSMUSG00000030000	Add2	TSS75822	6:86078083-86119555	0.369927198	1.59480188	3.009744918	0.082765315	0.905723492
ENSMUSG00000019970	Sgk1	TSS10155,TSS20764,TSS30644,TSS31249,TSS3205,TSS43330,TSS45345,TSS54164,TSS56701,TSS80565,TSS85950	10:21882183-21999903	0.15406716	6.186513158	3.008972716	0.082804754	0.905723492
ENSMUSG00000021916	Glt8d1	TSS60641,TSS83160	14:30999825-31019089	0.150350936	5.016796858	3.008234386	0.082842482	0.905723492
ENSMUSG00000039410	Prdm16	TSS10348,TSS23217,TSS2392,TSS27561,TSS36941,TSS68913,TSS73823	4:154316124-154636873	-0.184805571	4.705972712	3.007691712	0.082870225	0.905723492
ENSMUSG00000029547	Ints1	TSS70869	5:139751281-139775678	-0.235555939	5.865129148	3.004398612	0.083038788	0.905723492
ENSMUSG00000052040	Klf13	TSS58609	7:63886350-63938915	-0.112111994	6.153100155	3.000330372	0.08324754	0.905723492
ENSMUSG00000072980	Oip5	TSS23401	2:119609511-119651244	-0.231162608	3.243003344	2.99934336	0.083298271	0.905723492
ENSMUSG00000027698	Nceh1	TSS31980,TSS60872,TSS68521	3:27182964-27284608	0.172852326	6.612187843	2.998470936	0.083343141	0.905723492
ENSMUSG00000033174	Mgll	TSS41973,TSS44721,TSS62417,TSS68140,TSS81549,TSS8485	6:88716423-88828360	0.181918128	6.907224714	2.998118655	0.083361266	0.905723492
ENSMUSG00000039693	5730528L13Rik	TSS20708,TSS44834,TSS60928,TSS6960,TSS71757	4:48539934-48561919	-0.163628331	4.569774838	2.997288979	0.083403971	0.905723492
ENSMUSG00000090272	Mndal	TSS1912	1:173857220-173942672	-0.479984128	2.581791562	2.997178351	0.083409667	0.905723492
ENSMUSG00000034673	Pbx2	TSS36279,TSS39642,TSS45935,TSS50509	17:34589805-34597400	0.145406198	5.353632401	2.997133746	0.083411964	0.905723492
ENSMUSG00000037697	Ddhd1	TSS2560,TSS27211,TSS34900,TSS39360,TSS46551,TSS48072,TSS6210,TSS68177,TSS69477,TSS78723	14:45587739-45658143	0.128241423	5.379573761	2.991375118	0.083709056	0.907249246
ENSMUSG00000032680	6820408C15Rik	TSS12352,TSS14691,TSS22054	2:152415586-152444330	0.328281412	2.125181506	2.990021948	0.083779033	0.907249246
ENSMUSG00000003992	Ssbp2	TSS26573,TSS2782,TSS44199,TSS50194,TSS58631,TSS62793,TSS65051,TSS65301,TSS71282	13:91460282-91786148	-0.121992343	6.084881436	2.988746537	0.083845046	0.907249246
ENSMUSG00000032320	Rcn2	TSS10694,TSS30124,TSS47406,TSS70439	9:56041844-56061882	0.119215964	5.788737147	2.986507511	0.083961071	0.907249246
ENSMUSG00000046718	Bst2	TSS41494	8:71534263-71537437	-0.495471079	3.76429582	2.986107919	0.083981796	0.907249246
ENSMUSG00000004994	Ccdc130	TSS25594,TSS33280,TSS34151,TSS38433,TSS40840,TSS54352,TSS71920	8:84257794-84270380	0.241838762	2.868708503	2.985747888	0.084000474	0.907249246
ENSMUSG00000052544	St6galnac3	TSS79824	3:153205404-153725062	0.330198163	2.283710845	2.983987956	0.084091841	0.907249246
ENSMUSG00000096976	AC140392.2	TSS42769	9:90091670-90114820	0.218129606	3.740383035	2.981809982	0.084205058	0.907249246
ENSMUSG00000027082	Tfpi	TSS1218,TSS41370,TSS41852,TSS44605,TSS55469,TSS55975,TSS63980,TSS6668,TSS78158,TSS83352	2:84432854-84476775	0.137316919	6.899278702	2.981796664	0.084205751	0.907249246
ENSMUSG00000049866	Arl4c	TSS63578,TSS73671	1:88673124-88702221	-0.143244711	5.104864047	2.98113553	0.084240152	0.907249246
ENSMUSG00000029623	Pdap1	TSS15132,TSS18708,TSS20161,TSS46591	5:145114214-145140238	-0.134781703	6.289168391	2.979207712	0.084340549	0.907589608
ENSMUSG00000023572	Ccndbp1	TSS23915,TSS36649,TSS40592,TSS46212,TSS7300,TSS76220,TSS78092,TSS78854	2:121008402-121016904	0.162458084	4.375162428	2.976774394	0.084467456	0.908214458
ENSMUSG00000036555	Iqce	TSS14538,TSS23050,TSS24230,TSS3270,TSS36821,TSS45341,TSS54294,TSS54990,TSS6466,TSS68341,TSS84148	5:140661826-140702378	0.183325065	3.977493833	2.969262106	0.084860554	0.909748412
ENSMUSG00000043872	Zmym1	TSS18600,TSS43302,TSS48947,TSS66725,TSS70800,TSS79386,TSS81564	4:127021323-127061152	-0.186686091	4.216703705	2.968002803	0.084926643	0.909748412
ENSMUSG00000038418	Egr1	TSS11135,TSS72362	18:34859822-34864984	-0.458281479	2.280781939	2.965670356	0.085049199	0.909748412
ENSMUSG00000043190	Rfesd	TSS17115,TSS45470,TSS85813	13:76001534-76018712	0.252375937	2.980652129	2.964830788	0.08509336	0.909748412
ENSMUSG00000028318	Polr1e	TSS15368,TSS15369,TSS19537,TSS5058,TSS53380,TSS56836,TSS80525	4:45018582-45084604	-0.145240829	5.513158965	2.964408288	0.085115593	0.909748412
ENSMUSG00000037509	Arhgef4	TSS11859,TSS15126,TSS58529,TSS59786,TSS66373,TSS76522,TSS82002	1:34678187-34843065	0.35679377	3.432379645	2.964011984	0.085136453	0.909748412
ENSMUSG00000022220	Adcy4	TSS16905,TSS43723	14:55769057-55784042	0.158432756	4.838698706	2.963600024	0.085158143	0.909748412
ENSMUSG00000037533	Rapgef6	TSS17171,TSS20754,TSS21853,TSS26444,TSS69301,TSS74174,TSS76075	11:54522846-54699285	-0.115355578	7.048986643	2.958694576	0.085416877	0.909748412
ENSMUSG00000024535	Snx24	TSS211,TSS71464	18:53245661-53390823	0.194200976	4.011600505	2.958535373	0.085425289	0.909748412
ENSMUSG00000021365	Nedd9	TSS68182,TSS75179	13:41309915-41487320	0.154069634	6.341657755	2.956261969	0.085545499	0.909748412
ENSMUSG00000072437	Nanos1	TSS3294	19:60755986-60759913	0.411080284	2.004457491	2.956197437	0.085548914	0.909748412
ENSMUSG00000024885	Aldh3b1	TSS55781	19:3913492-3929761	0.431020044	1.068671191	2.955931631	0.085562981	0.909748412
ENSMUSG00000017778	Cox7c	TSS47125,TSS48894,TSS72422,TSS73600	13:86044815-86046904	-0.148844643	6.117879225	2.95572396	0.085573974	0.909748412
ENSMUSG00000056427	Slit3	TSS28817,TSS57441,TSS60073,TSS83386	11:35121223-35708507	0.209263197	3.934915504	2.950896927	0.08582991	0.909748412
ENSMUSG00000018068	Ints2	TSS13257,TSS19026,TSS28402,TSS50901,TSS50905,TSS57483,TSS6331,TSS69401,TSS7513,TSS82793,TSS9237	11:86201369-86357602	-0.129392708	5.481259969	2.950837051	0.08583309	0.909748412
ENSMUSG00000084799	Gm11602	TSS50079	1:62958417-63176822	-0.287226351	2.448959866	2.949524681	0.08590282	0.909748412
ENSMUSG00000038943	Prc1	TSS17030,TSS25209,TSS26560,TSS2873,TSS35875,TSS44168,TSS45372,TSS48276,TSS51057,TSS64767,TSS67479,TSS71569,TSS75164	7:80294449-80316259	-0.125192278	7.751609362	2.947897889	0.085989341	0.909748412
ENSMUSG00000056666	Retsat	TSS18588,TSS5981,TSS6804,TSS73262	6:72598474-72608425	0.234053179	5.180097047	2.947868511	0.085990904	0.909748412
ENSMUSG00000048410	Zfp407	TSS42562,TSS70374,TSS70940,TSS77403	18:84128026-84589725	-0.121795804	6.23090605	2.94689342	0.086042811	0.909748412
ENSMUSG00000049577	Zfpm1	TSS13825,TSS44988,TSS67346,TSS67403	8:119910359-124345724	-0.330880891	4.104728219	2.94490462	0.086148785	0.909748412
ENSMUSG00000032220	Myo1e	TSS66627	9:70207349-70400067	0.1725693	4.998559195	2.944818187	0.086153394	0.909748412
ENSMUSG00000024426	Atat1	TSS19403,TSS22869,TSS26619,TSS26808,TSS35510,TSS44803,TSS45173,TSS591,TSS71393,TSS77058,TSS77214,TSS77290,TSS79418,TSS79796	17:35892676-35916389	0.245522806	3.280450999	2.944626022	0.086163641	0.909748412
ENSMUSG00000031776	Arl2bp	TSS19213,TSS22292	8:94666754-94674417	-0.108857111	6.279082571	2.944016991	0.086196128	0.909748412
ENSMUSG00000020538	Srebf1	TSS11655,TSS17245,TSS21141,TSS23477,TSS3392,TSS46396,TSS49205,TSS56303,TSS58120,TSS59701,TSS70815,TSS73698	11:60105012-60222581	-0.248734986	5.820613587	2.938371158	0.086497917	0.910520691
ENSMUSG00000025245	Lztfl1	TSS14980,TSS34261,TSS34267,TSS39707,TSS49247,TSS71179,TSS7337,TSS74408,TSS82345	9:123635387-123851899	0.158877566	5.447066337	2.937077466	0.086567231	0.910520691
ENSMUSG00000022336	Eif3e	TSS80709	15:43250039-43282736	0.111580498	7.154574428	2.936266379	0.086610718	0.910520691
ENSMUSG00000074865	Zfp934	TSS42105,TSS72866	13:62517499-62520544	-0.326220948	1.95857095	2.935956769	0.086627324	0.910520691
ENSMUSG00000044952	Kctd21	TSS44675	7:97332326-97350213	0.302629036	2.615457303	2.935593463	0.086646815	0.910520691
ENSMUSG00000026430	Rassf5	TSS31109,TSS80328	1:131153180-131245258	0.252612362	3.181968082	2.934911903	0.086683392	0.910520691
ENSMUSG00000062373	Tmem65	TSS2704	15:58782268-58823530	-0.131270765	7.205906054	2.931954279	0.086842312	0.910760996
ENSMUSG00000023008	Fmnl3	TSS18228,TSS51099,TSS67702,TSS73758	15:99317224-99370482	0.129993499	5.45582686	2.930946411	0.086896539	0.910760996
ENSMUSG00000037851	Iars	TSS14601,TSS34518,TSS52742,TSS53093,TSS56994,TSS62804,TSS7282,TSS77846,TSS8525	13:49682099-49734267	-0.121226781	6.503968509	2.929617498	0.086968095	0.910760996
ENSMUSG00000038525	Armc10	TSS31189,TSS32518,TSS48559,TSS70867,TSS72839	5:21645812-21662694	0.187763103	4.785892148	2.927338842	0.08709094	0.910760996
ENSMUSG00000002052	Supt6h	TSS7264,TSS76889	11:78206745-78255496	0.104598608	6.822635731	2.926710965	0.087124823	0.910760996
ENSMUSG00000019822	Smpd2	TSS11412,TSS2135,TSS33023,TSS36627,TSS48688,TSS51139,TSS64566,TSS83047	10:41476313-41490369	0.13723504	5.350912246	2.924153546	0.087262978	0.910760996
ENSMUSG00000082057	Gm15789	TSS34392	1:66700830-66817562	-0.610045784	1.047893047	2.922916236	0.087329904	0.910760996
ENSMUSG00000097695	AC163097.1	TSS4826	8:58171434-58298866	-0.225766812	9.171694621	2.92226747	0.087365018	0.910760996
ENSMUSG00000058793	Cds2	TSS20924,TSS2148,TSS25314,TSS35090,TSS50203	2:132263147-132312050	0.137468719	8.135105519	2.921928902	0.087383349	0.910760996
ENSMUSG00000000088	Cox5a	TSS84475	9:57521231-57543187	-0.107136194	7.497156014	2.921684101	0.087396606	0.910760996
ENSMUSG00000073643	Wdfy1	TSS15518,TSS49198,TSS55274,TSS69915,TSS71260	1:79702261-79781445	0.50113955	4.32615834	2.918845505	0.087550483	0.911349869
ENSMUSG00000025330	Padi4	TSS67402,TSS75665,TSS8542,TSS8543	4:140745864-140774236	-0.422793032	1.030417825	2.913080461	0.087863905	0.911349869
ENSMUSG00000003072	Atp5d	TSS32851,TSS48342,TSS52087,TSS86065	10:80115802-80145818	-0.159945013	8.075634663	2.911218027	0.087965417	0.911349869
ENSMUSG00000026077	Npas2	TSS24537,TSS34059,TSS75919	1:39193730-39363234	-0.2563435	3.52523931	2.911059983	0.087974037	0.911349869
ENSMUSG00000029563	Foxp2	TSS25790,TSS26463,TSS28707,TSS29934,TSS31712,TSS35477,TSS42584,TSS50640,TSS52289,TSS62788,TSS66815,TSS70433,TSS7106,TSS75183,TSS84203	6:14901348-15441977	-0.239659734	3.680428001	2.911016758	0.087976395	0.911349869
ENSMUSG00000040680	Kremen2	TSS2050	17:23741199-23754065	-0.474428691	1.2215543	2.910844427	0.087985796	0.911349869
ENSMUSG00000030611	Mrps11	TSS27195,TSS29695,TSS43665,TSS5015,TSS71890,TSS79175	7:78775235-78792989	-0.199262832	4.114901825	2.909683293	0.088049164	0.911349869
ENSMUSG00000061331	Gm17132	TSS13488	5:127783490-128433077	-0.23106385	7.967661275	2.909521696	0.088057987	0.911349869
ENSMUSG00000047264	Zfp358	TSS16118	8:3493137-3497208	0.206521268	4.253989848	2.909149821	0.088078294	0.911349869
ENSMUSG00000025450	Gm9752	TSS54396	13:119462758-119486117	0.346426488	2.530532016	2.907949121	0.088143897	0.911349869
ENSMUSG00000054568	Dub1	TSS74857	7:104857008-104862667	-0.442665091	1.741515602	2.905389172	0.088283942	0.911761437
ENSMUSG00000025151	Maged1	TSS19473,TSS21528,TSS26035,TSS44818,TSS46802,TSS50382,TSS71392	X:94535473-94542143	0.133818876	8.523617855	2.903327322	0.088396914	0.911761437
ENSMUSG00000048856	Slc25a47	TSS31882	12:108851128-108856814	-0.362411881	1.591326315	2.902280302	0.088454341	0.911761437
ENSMUSG00000040048	Ndufb10	TSS51960,TSS5216,TSS61658,TSS71092,TSS74287,TSS78500	17:24722059-24724478	-0.114549753	7.761605174	2.900829184	0.088534	0.911761437
ENSMUSG00000058586	Serhl	TSS12180,TSS24120,TSS27148,TSS31118,TSS39126,TSS39787,TSS49520,TSS50175,TSS56060,TSS57847,TSS59168,TSS6795,TSS69962,TSS73657,TSS79094,TSS79445,TSS83932	15:83089505-83122801	0.122085946	5.789345342	2.899712566	0.088595349	0.911761437
ENSMUSG00000041438	Cirh1a	TSS71366	8:106893639-106923093	0.173722574	5.023582264	2.899657789	0.08859836	0.911761437
ENSMUSG00000054008	Ndst1	TSS68268	18:60685977-60713389	0.11367497	6.854292538	2.895923764	0.088803858	0.913159118
ENSMUSG00000055320	Tead1	TSS25938,TSS28941,TSS33003,TSS34379,TSS42876,TSS52443,TSS56269,TSS60887,TSS62106,TSS70517,TSS75610,TSS83168	7:112613467-112906807	-0.157533358	6.458220675	2.894583273	0.088877756	0.913159118
ENSMUSG00000023022	Lima1	TSS17892,TSS27541,TSS5051,TSS81328	15:99733505-99875428	0.12614433	5.672872783	2.893422098	0.088941823	0.913159118
ENSMUSG00000028069	Gpatch4	TSS37964	3:88043107-88055993	-0.260023048	3.61222785	2.89102214	0.089074397	0.913677046
ENSMUSG00000027173	Depdc7	TSS37912,TSS61630	2:104721783-104742878	-0.316859828	2.14485989	2.889666352	0.089149386	0.913677046
ENSMUSG00000042616	Oscp1	TSS25471,TSS43879,TSS68815,TSS69484	4:126058564-126092195	0.34945596	2.463526136	2.888751362	0.089200033	0.913677046
ENSMUSG00000030823	9130019O22Rik	TSS75715,TSS8773	7:127382259-127387166	0.265152894	2.720369139	2.887138622	0.089289378	0.913882672
ENSMUSG00000037260	Hgsnat	TSS27444	8:25944458-25976744	0.138723573	4.900475464	2.885392734	0.089386209	0.914164537
ENSMUSG00000042581	Thsd7b	TSS2403,TSS53740,TSS62658,TSS64624,TSS69485,TSS7239,TSS80722,TSS82745	1:129273301-130219278	-0.394731617	1.638374282	2.883169129	0.0895097	0.914601697
ENSMUSG00000032184	Lysmd2	TSS11715	9:75625731-75637773	0.264811574	2.612700868	2.880646855	0.089650002	0.914601697
ENSMUSG00000037474	Dtl	TSS1775	1:191537364-191575534	-0.188105102	5.285627512	2.880257903	0.089671659	0.914601697
ENSMUSG00000004568	Arhgef18	TSS11408,TSS23717,TSS33343,TSS52910,TSS74538	8:3393005-3456601	0.138013902	5.154950034	2.878413374	0.089774439	0.914601697
ENSMUSG00000022370	Mrpl13	TSS22636,TSS23474,TSS74914,TSS9234,TSS9933	15:55534093-55626423	-0.120568304	5.994104683	2.877919451	0.089801983	0.914601697
ENSMUSG00000021598	Med10	TSS37252	13:69809881-69816094	-0.316376208	1.931726991	2.876622604	0.089874346	0.914601697
ENSMUSG00000092412	Gm20507	TSS70312	17:33629089-33645706	0.441574276	1.459949297	2.875595601	0.089931697	0.914601697
ENSMUSG00000068856	Sf3b4	TSS67526,TSS8071	3:96162003-96177564	-0.297828426	2.984414269	2.870497373	0.090216985	0.914601697
ENSMUSG00000092400	Gm20469	TSS45393	16:66655420-67620908	-0.176433942	6.118439968	2.870480628	0.090217924	0.914601697
ENSMUSG00000006191	Cdkal1	TSS10993,TSS1866,TSS33367,TSS43050,TSS43053,TSS61639,TSS65360,TSS65362,TSS74964,TSS78647	13:29191745-29855674	-0.136178428	5.258950928	2.86989411	0.090250808	0.914601697
ENSMUSG00000044067	Gpr22	TSS64106,TSS64499,TSS76197	12:31654868-31950535	-0.187530131	5.053870584	2.869426087	0.090277057	0.914601697
ENSMUSG00000029449	Rhof	TSS24643,TSS3127,TSS71216	5:123047372-123250131	0.333824742	2.010541151	2.863906734	0.090587243	0.914601697
ENSMUSG00000036825	Ssx2ip	TSS21457,TSS29027,TSS41733,TSS49648,TSS7302,TSS74792	3:146404641-146440139	-0.156099659	5.102546764	2.863546248	0.090607542	0.914601697
ENSMUSG00000063018	2010204K13Rik	TSS32324,TSS33362,TSS55971,TSS9421	X:7411816-7445143	-0.374546423	1.769832843	2.863210652	0.090626444	0.914601697
ENSMUSG00000089702	Gm16568	TSS2889	9:15316914-15357788	-0.205058684	3.844461415	2.861351414	0.090731242	0.914601697
ENSMUSG00000039166	Akap7	TSS15170,TSS25574,TSS61849,TSS69143,TSS7117,TSS7753,TSS82857	10:25169089-25307870	0.13039725	5.084074463	2.859802897	0.090818626	0.914601697
ENSMUSG00000091363	Gm7701	TSS39838	18:24205343-24286818	-0.261748587	2.689894491	2.859561808	0.090832239	0.914601697
ENSMUSG00000097911	AC123608.1	TSS1560,TSS57296	3:133955472-134262090	-0.215550496	4.24808068	2.858996413	0.090864173	0.914601697
ENSMUSG00000031641	Cbr4	TSS33448,TSS36418,TSS36518,TSS39599,TSS50104,TSS5260	8:61487733-61503482	0.169585305	4.484025774	2.858482727	0.090893197	0.914601697
ENSMUSG00000020477	Mrps24	TSS22949,TSS31064,TSS40585,TSS63857,TSS77131	11:5703982-5784710	-0.14618339	4.885307249	2.858010377	0.090919894	0.914601697
ENSMUSG00000021773	Comtd1	TSS11693,TSS19105,TSS21438,TSS77517	14:21831268-21856926	-0.24677774	3.009567087	2.857516916	0.090947793	0.914601697
ENSMUSG00000027351	Spred1	TSS32424,TSS53489	2:117121373-117182279	-0.10193567	6.482475082	2.857405409	0.090954099	0.914601697
ENSMUSG00000001211	Agpat3	TSS16914,TSS28716,TSS41165,TSS43943,TSS45620,TSS50446,TSS54351,TSS57725,TSS61513,TSS64986,TSS84493	10:78269177-78352489	0.137497818	7.05903269	2.854865261	0.091097872	0.915349753
ENSMUSG00000022517	Mgrn1	TSS12805	16:4886099-4941020	0.112757677	7.499031399	2.851769897	0.091273404	0.915925186
ENSMUSG00000021037	Ahsa1	TSS30263	12:87266745-87273997	-0.120993372	6.788112197	2.851407295	0.091293991	0.915925186
ENSMUSG00000034349	Smc4	TSS16628,TSS21154,TSS21699,TSS23647,TSS29313,TSS29431,TSS56585,TSS58944,TSS78820	3:69004737-69034623	-0.13069318	8.297783323	2.848907599	0.091436047	0.916541044
ENSMUSG00000029592	Usp30	TSS66253	5:114100332-114123506	0.16719452	4.29294344	2.84672439	0.091560313	0.916541044
ENSMUSG00000029089	Pacrgl	TSS9205	5:48372391-48388756	-0.281296663	2.565571407	2.846407956	0.091578339	0.916541044
ENSMUSG00000051456	Hspb3	TSS50496	13:113662895-113663676	-0.167927146	4.203773782	2.845404633	0.091635522	0.916541044
ENSMUSG00000063275	Ptpla	TSS38704,TSS52411,TSS56077	2:13975562-14056135	-0.120484979	6.306230644	2.844226173	0.091702735	0.916541044
ENSMUSG00000032666	1700025G04Rik	TSS36697,TSS5346,TSS6580	1:151884523-152090320	-0.122566427	6.329074881	2.84008639	0.091939271	0.918209537
ENSMUSG00000020089	Ppa1	TSS30473,TSS60442,TSS66352,TSS68404	10:61648551-61674168	-0.177571275	5.434419308	2.838358032	0.092038221	0.918502453
ENSMUSG00000036281	Snapc4	TSS26825,TSS31595,TSS41932,TSS44449,TSS4620,TSS46768,TSS56201,TSS64524,TSS76909,TSS77437,TSS81070,TSS81074,TSS82971	2:26352175-26380653	0.155369937	4.607526076	2.836761831	0.092129707	0.918720502
ENSMUSG00000027478	Dnmt3b	TSS30227,TSS5018,TSS6707,TSS79671,TSS79674,TSS79677	2:153648689-153687730	0.260735772	2.708196938	2.833096307	0.092340171	0.919021228
ENSMUSG00000021687	Scamp1	TSS15188,TSS2583,TSS79154,TSS80650	13:94201309-94285857	0.12022298	5.438123279	2.831833988	0.092412771	0.919021228
ENSMUSG00000004032	Gstm5	TSS17112,TSS22885,TSS25572,TSS47268,TSS49095,TSS57545	3:107877229-107898686	-0.13702256	5.213481263	2.830660232	0.092480333	0.919021228
ENSMUSG00000005268	Prlr	TSS23933,TSS24329,TSS27935,TSS38106,TSS47732,TSS6901,TSS69940,TSS7053,TSS70989,TSS73482	15:10177237-10410153	-0.36828569	1.986173955	2.830659533	0.092480373	0.919021228
ENSMUSG00000001506	Col1a1	TSS25948,TSS31630,TSS66743,TSS82685	11:94936223-94953042	-0.221024801	8.018034746	2.830132561	0.092510723	0.919021228
ENSMUSG00000041471	Fam35a	TSS60350	14:34237040-34310503	0.213690904	3.407595258	2.828968177	0.092577823	0.919021228
ENSMUSG00000040612	Ildr2	TSS427	1:166254138-166316823	0.329004494	3.18355559	2.826026664	0.092747567	0.919566052
ENSMUSG00000034532	Fbxo16	TSS62052	14:65266700-65321501	-0.326534041	2.037118603	2.825560642	0.092774491	0.919566052
ENSMUSG00000060093	Hist1h4a	TSS5128	13:23760801-23761249	-0.533747737	3.255927009	2.82439608	0.092841809	0.919566052
ENSMUSG00000028339	Col15a1	TSS12108,TSS21969,TSS30996,TSS32108,TSS36596,TSS74528,TSS83292,TSS83749	4:47197486-47313167	-0.143141163	6.522257936	2.821534672	0.093007438	0.920515478
ENSMUSG00000035168	Tanc1	TSS12640,TSS2950,TSS3120,TSS31606,TSS39929,TSS5305,TSS54558,TSS57458,TSS6175,TSS68577,TSS76330	2:59612041-59846149	0.108337391	7.050951747	2.817970781	0.09321418	0.920614731
ENSMUSG00000054640	Slc8a1	TSS37152	17:81388690-81649607	-0.124871833	10.8851169	2.816022314	0.093327421	0.920614731
ENSMUSG00000028821	Syf2	TSS31661,TSS36049,TSS54618	4:134930897-134937548	0.150258435	5.066330594	2.811046309	0.093617299	0.920614731
ENSMUSG00000042599	Jhdm1d	TSS13671,TSS44669	6:39118407-39206789	0.129948632	6.419426635	2.808653324	0.09375705	0.920614731
ENSMUSG00000039065	Fam173b	TSS66177,TSS85143	15:31601851-31621227	-0.15161523	4.412825152	2.808367692	0.093773747	0.920614731
ENSMUSG00000021983	Atp8a2	TSS14481,TSS22657,TSS27883,TSS56907,TSS66667,TSS73818	14:59647530-60197179	-0.202669479	3.453707362	2.807684855	0.093813674	0.920614731
ENSMUSG00000059363	Fxn	TSS11915,TSS12401,TSS19471	19:24261452-24280605	-0.199562217	4.202935368	2.806416183	0.093887906	0.920614731
ENSMUSG00000032715	Trib3	TSS17747,TSS42651,TSS52952	2:152337421-152344032	0.39087494	1.398536084	2.806379267	0.093890067	0.920614731
ENSMUSG00000036781	Rps27l	TSS26182,TSS29513,TSS29529,TSS45396,TSS67819,TSS83420	9:66946085-66949516	-0.117295374	5.946211337	2.806262257	0.093896917	0.920614731
ENSMUSG00000039156	Stim2	TSS23107,TSS38966,TSS5007,TSS72282,TSS76819	5:53998416-54121057	0.132954357	4.932119191	2.806242298	0.093898085	0.920614731
ENSMUSG00000044813	Shb	TSS13593,TSS26781,TSS35933,TSS5557,TSS5992,TSS75026	4:45423277-45532470	-0.162540793	4.738593661	2.802314368	0.094128347	0.920614731
ENSMUSG00000064853	SNORA38	TSS22740	17:35149075-35164897	-0.285339465	3.710365289	2.800982614	0.094206556	0.920614731
ENSMUSG00000058655	Eif4b	TSS85833	15:102073772-102097172	0.127089932	8.310041234	2.80043983	0.094238452	0.920614731
ENSMUSG00000027575	Arfgap1	TSS36907,TSS36915,TSS37383,TSS3778,TSS40680,TSS4870,TSS49882,TSS5033,TSS5469,TSS63448,TSS68483,TSS68887,TSS75511,TSS78432	2:180967224-180982526	0.135502115	5.94591779	2.798667526	0.094342681	0.920614731
ENSMUSG00000026110	Mgat4a	TSS2753,TSS33741,TSS34127,TSS41172,TSS4376,TSS74616	1:37439339-37541016	0.192388339	5.352845876	2.798632928	0.094344717	0.920614731
ENSMUSG00000029596	Sdsl	TSS1411,TSS45516,TSS68055	5:120458185-120472810	-0.411210122	2.80014262	2.797382306	0.094418343	0.920614731
ENSMUSG00000028037	Ifi44	TSS11873,TSS2341,TSS43936,TSS67359	3:151730921-151749947	-0.745796804	2.878696182	2.796759799	0.094455015	0.920614731
ENSMUSG00000028538	St3gal3	TSS25876,TSS52303,TSS55369,TSS63258,TSS76643	4:117932153-118134914	-0.162993305	4.89419161	2.794967679	0.094560673	0.920614731
ENSMUSG00000019850	Tnfaip3	TSS25083,TSS3872,TSS4290,TSS72784,TSS74778,TSS77022	10:19000909-19015657	0.262685064	3.018658189	2.793592262	0.094641851	0.920614731
ENSMUSG00000047090	Tmem198b	TSS33066,TSS34943,TSS51159	10:128790952-128804370	0.176801361	4.336056707	2.790486253	0.09482545	0.920614731
ENSMUSG00000043282	Gm5531	TSS2122	1:153849541-153916910	0.462849397	1.102918405	2.789300795	0.094895625	0.920614731
ENSMUSG00000026930	Gpsm1	TSS10490,TSS27347,TSS3067,TSS34269,TSS34692,TSS40334,TSS51927,TSS51943,TSS52878,TSS66419,TSS6903,TSS69108,TSS75163	2:26315514-26352110	-0.109211411	6.987439152	2.789209169	0.094901051	0.920614731
ENSMUSG00000034595	Ppp1r18	TSS28235,TSS35008,TSS59049,TSS8435	17:35860917-35875596	0.150743355	4.4832351	2.789125067	0.094906032	0.920614731
ENSMUSG00000064363	mt-Nd4	TSS63686	MT:9876-11544	-0.174397653	10.43359301	2.789023735	0.094912034	0.920614731
ENSMUSG00000027546	Atp9a	TSS12732,TSS14747,TSS30058,TSS34358,TSS38628,TSS39632,TSS52716,TSS59259,TSS67967,TSS71504	2:168634437-168742409	0.165594931	5.473759887	2.788585752	0.094937981	0.920614731
ENSMUSG00000025269	Apex2	TSS13368,TSS25406,TSS25409,TSS26151,TSS33382,TSS36151,TSS4710,TSS76671,TSS79616	X:150519518-150643878	0.275829691	4.822390252	2.787999168	0.094972742	0.920614731
ENSMUSG00000030102	Itpr1	TSS55771	6:108213117-108551109	0.11617343	7.782456061	2.787415511	0.095007344	0.920614731
ENSMUSG00000046152	Fut10	TSS11100,TSS23554,TSS28884,TSS65475,TSS67240	8:31187330-31261738	-0.167809795	4.042959672	2.78647215	0.0950633	0.920614731
ENSMUSG00000026623	Lpgat1	TSS46954,TSS76400,TSS82178,TSS8866	1:191717833-191784255	-0.115189985	7.705596527	2.786239017	0.095077134	0.920614731
ENSMUSG00000034591	Slc41a2	TSS31447,TSS5065,TSS55079,TSS61232,TSS78660	10:83230847-83337882	0.356565278	2.134267087	2.785670431	0.095110883	0.920614731
ENSMUSG00000031388	Naa10	TSS23199,TSS23613,TSS39406,TSS40128,TSS42387,TSS50699,TSS51352,TSS7410,TSS74331,TSS79141,TSS79722,TSS9917	X:73853777-73921944	-0.162433392	5.117620485	2.784477006	0.095181762	0.920625353
ENSMUSG00000059974	Ntm	TSS18619,TSS31594,TSS32768,TSS33440,TSS39167,TSS46352,TSS47662,TSS55783,TSS58110	9:28994749-29963141	0.243327752	3.34956906	2.780771814	0.095402183	0.922081323
ENSMUSG00000086877	A230072C01Rik	TSS41195,TSS60080	X:20933394-20986737	0.357882417	1.566057217	2.778306303	0.095549165	0.92218098
ENSMUSG00000043822	Adamtsl5	TSS12789,TSS56232,TSS71071,TSS83132	10:80339109-80348412	-0.253863517	4.339866462	2.778253872	0.095552293	0.92218098
ENSMUSG00000027510	Rbm38	TSS24111,TSS43425,TSS52449,TSS55031,TSS76311,TSS77541,TSS78664,TSS83044	2:173020497-173034734	-0.196420762	5.432795248	2.774594179	0.095770928	0.923326478
ENSMUSG00000090698	Apold1	TSS77303	6:134982000-134986836	0.206641147	5.859036444	2.773925127	0.095810956	0.923326478
ENSMUSG00000022372	Sla	TSS19807,TSS37516,TSS48268,TSS48903,TSS54125	15:66670752-66850721	0.349708635	1.673882764	2.772129311	0.095918489	0.923688047
ENSMUSG00000024077	Strn	TSS23336,TSS26559,TSS85294	17:78649912-78737196	-0.105934246	8.133324626	2.768785698	0.096119053	0.924470947
ENSMUSG00000061143	Maml3	TSS43629,TSS58270	3:51687610-52104891	0.186735573	3.776735546	2.76843804	0.096139933	0.924470947
ENSMUSG00000030647	Ndufc2	TSS60446,TSS775	7:97400002-97407802	-0.141882926	6.994259338	2.765771577	0.096300244	0.924500456
ENSMUSG00000054452	Aes	TSS54377	10:81559493-81566362	-0.132731069	8.278092431	2.765065936	0.096342717	0.924500456
ENSMUSG00000024851	Pitpnm1	TSS15248,TSS16738,TSS1828,TSS31451,TSS33786,TSS34495,TSS34570,TSS52497,TSS54922,TSS63692,TSS72380	19:4099997-4113965	-0.183438507	5.163178803	2.764891375	0.096353227	0.924500456
ENSMUSG00000029147	Ppm1g	TSS79109	5:31202667-31220545	-0.137313791	6.527270932	2.763038155	0.096464884	0.924899135
ENSMUSG00000039741	Bahcc1	TSS17443,TSS20567,TSS57849,TSS63924	11:120232946-120292296	-0.328749548	3.99237335	2.759013778	0.096707838	0.926141142
ENSMUSG00000033542	Arhgef5	TSS50337	6:43265643-43289320	0.140784275	5.289664448	2.75705157	0.096826539	0.926141142
ENSMUSG00000001942	Siae	TSS81517	9:37613846-37648318	0.197069954	4.215806222	2.753350225	0.09705088	0.926141142
ENSMUSG00000086968	4933431E20Rik	TSS19055,TSS26645,TSS53694,TSS54027,TSS54679,TSS73335,TSS73338,TSS73847,TSS80863,TSS81727,TSS85991,TSS9474	3:107877229-107898686	-0.222103279	4.042558889	2.752008715	0.09713233	0.926141142
ENSMUSG00000019577	Pdk4	TSS12660,TSS39782	6:5483350-5496309	0.334804374	5.50508989	2.75087018	0.097201515	0.926141142
ENSMUSG00000047246	Hist1h2be	TSS2250,TSS5064,TSS60475	13:23583741-23621124	-0.38082505	3.55844594	2.750378571	0.097231404	0.926141142
ENSMUSG00000024603	Dctn4	TSS42068	18:60526220-60558762	0.102043563	6.819935621	2.750236929	0.097240018	0.926141142
ENSMUSG00000031377	Bmx	TSS28267,TSS77178	X:164192841-164258193	0.282888606	2.691328837	2.750024812	0.097252919	0.926141142
ENSMUSG00000034105	4632415K11Rik	TSS60028	8:119760586-119778416	0.232266765	3.8616988	2.747848699	0.097385379	0.926141142
ENSMUSG00000079480	Pin4	TSS40681,TSS44870	X:102119446-102127669	-0.280000631	2.679971947	2.74311904	0.097673953	0.926141142
ENSMUSG00000034424	Gcsh	TSS23712,TSS71765	8:116981809-116993537	-0.130875016	5.35713355	2.742668167	0.097701511	0.926141142
ENSMUSG00000026269	Rnpepl1	TSS15056,TSS15933,TSS47144,TSS51110,TSS5893,TSS60707,TSS6071,TSS60923,TSS67401,TSS69339,TSS70874,TSS84290	1:92910782-92924384	-0.165715277	5.604967233	2.742144883	0.097733505	0.926141142
ENSMUSG00000018427	Ypel2	TSS24719	11:86936424-86993707	0.177626694	6.28749225	2.74162779	0.097765133	0.926141142
ENSMUSG00000031577	Tti2	TSS52104	8:31150315-31168724	0.186021056	4.237156435	2.741453626	0.097775788	0.926141142
ENSMUSG00000097574	AC159313.1	TSS17733	9:78175913-78178879	0.405735801	1.374499899	2.741448614	0.097776094	0.926141142
ENSMUSG00000065226	SNORA8	TSS8748	9:15314844-15314981	-0.243871548	3.411526981	2.74001076	0.097864108	0.926141142
ENSMUSG00000093760	Gm20678	TSS3771	14:18573574-18894267	-0.337858457	1.752060494	2.73962485	0.097887745	0.926141142
ENSMUSG00000039834	Zfp335	TSS60821,TSS80464	2:164879303-164919953	-0.151223717	5.118417648	2.73907692	0.097921316	0.926141142
ENSMUSG00000033114	Slc35d2	TSS80835	13:64096309-64129330	0.348214744	2.275575932	2.735144911	0.098162597	0.926141142
ENSMUSG00000027131	Emc4	TSS33309,TSS33340	2:112265824-112414240	-0.135017153	5.057169452	2.735056028	0.098168058	0.926141142
ENSMUSG00000092187	Gm20457	TSS53073	7:64287652-64345964	0.365388396	1.623907739	2.734477966	0.098203587	0.926141142
ENSMUSG00000027175	Tcp11l1	TSS37758,TSS37762,TSS37766,TSS45277,TSS5835,TSS68151,TSS75193	2:104590522-104712169	-0.254070363	3.072659557	2.733712164	0.098250676	0.926141142
ENSMUSG00000029510	Gpc2	TSS1568,TSS29353,TSS29354,TSS29355,TSS51688,TSS55514,TSS71702,TSS82341	5:138259655-138280005	0.366637949	2.653487223	2.733505225	0.098263405	0.926141142
ENSMUSG00000079109	Pms2	TSS18086,TSS18093,TSS21650,TSS32612,TSS49068,TSS59188,TSS67658,TSS71293,TSS75153,TSS8438	5:143909963-143985719	-0.151085679	4.691407311	2.732262824	0.098339863	0.926141142
ENSMUSG00000068732	Tmem167b	TSS23247,TSS4840	3:108556424-108562466	0.109804349	5.769837361	2.732107791	0.098349408	0.926141142
ENSMUSG00000018661	Cog1	TSS19262,TSS22041,TSS22431,TSS41520,TSS58756,TSS70177,TSS72142,TSS83779	11:113244852-113684155	0.151543042	4.818128231	2.72833325	0.098582118	0.927490772
ENSMUSG00000004462	Tbccd1	TSS38124	16:22813214-22857569	-0.183317162	3.997515015	2.724637662	0.098810543	0.927490772
ENSMUSG00000030283	St8sia1	TSS26352,TSS4285	6:142814230-142964452	0.350264275	1.7348917	2.724362986	0.098827544	0.927490772
ENSMUSG00000018565	Elp5	TSS14484,TSS15761,TSS21986,TSS33956,TSS42554,TSS51615,TSS53435,TSS67194,TSS77428,TSS85581	11:69968221-69990601	-0.115583333	5.728072419	2.722116324	0.098966719	0.927490772
ENSMUSG00000047379	B3gnt1	TSS56906	19:5038825-5041134	0.147994494	4.625429297	2.720680517	0.099055775	0.927490772
ENSMUSG00000030399	Ckm	TSS40010	7:19411093-19421583	-0.150423444	10.68412508	2.720625997	0.099059159	0.927490772
ENSMUSG00000060981	Hist1h4h	TSS72883	13:23531043-23531519	-0.449013514	4.585724317	2.720416675	0.09907215	0.927490772
ENSMUSG00000040152	Thbs1	TSS37972,TSS86028	2:118111875-118127133	-0.154124538	6.848025166	2.719741146	0.099114088	0.927490772
ENSMUSG00000015093	Clic3	TSS20106,TSS32716,TSS38064,TSS44211,TSS61392	2:25455140-25461094	0.287029539	2.204327446	2.719558267	0.099125444	0.927490772
ENSMUSG00000031666	Rbl2	TSS21197,TSS26461,TSS45146,TSS50256,TSS60177,TSS60388,TSS6545	8:91070056-91134465	0.172784131	6.102886328	2.716448394	0.099318784	0.927826953
ENSMUSG00000028580	Pum1	TSS22158,TSS38338,TSS54048,TSS66750,TSS70456,TSS85926	4:130663320-130781564	-0.104757232	6.96969998	2.716020859	0.099345396	0.927826953
ENSMUSG00000035385	Ccl2	TSS17751,TSS23448	11:82028223-82038562	-0.425322864	1.844838799	2.713710238	0.099489355	0.927826953
ENSMUSG00000030034	Ino80b	TSS35708,TSS57167	6:83121764-83125431	-0.275729336	2.355525412	2.712569111	0.099560535	0.927826953
ENSMUSG00000074102	Rbm15b	TSS14454	9:106821873-106891979	0.186915863	3.748492256	2.711645168	0.099618208	0.927826953
ENSMUSG00000071646	Mta2	TSS30060,TSS34435,TSS4064,TSS56344,TSS5942,TSS6078	19:8941874-8952303	0.125097844	6.649840156	2.71126479	0.099641962	0.927826953
ENSMUSG00000024134	Six2	TSS17093,TSS80960	17:85684267-85688274	-0.319482245	3.353623484	2.70896576	0.099785666	0.927826953
ENSMUSG00000047011	Mtap4	TSS67959	9:109931457-110083947	-0.588340375	2.603354277	2.707879859	0.09985362	0.927826953
ENSMUSG00000030494	Rhpn2	TSS4043,TSS68514,TSS74018	7:35334174-35396817	0.22934898	3.542184039	2.70766543	0.099867044	0.927826953
ENSMUSG00000078681	Tm2d3	TSS23082,TSS24622,TSS37307,TSS3758	7:65644897-65701913	-0.220248708	3.527021215	2.707057275	0.09990513	0.927826953
ENSMUSG00000030287	Itpr2	TSS13297,TSS31377,TSS3266,TSS45899,TSS47044,TSS61982,TSS77196,TSS8255	6:146108298-146502223	0.15194315	7.294639008	2.706580901	0.099934973	0.927826953
ENSMUSG00000024150	Mcfd2	TSS30379,TSS5189,TSS59388,TSS72486,TSS84651,TSS944	17:87254657-87265935	0.110583033	5.798773971	2.70490314	0.100040158	0.927903508
ENSMUSG00000058297	Spock2	TSS17741,TSS49746	10:60106218-60135198	0.186453215	4.202109479	2.701845065	0.10023219	0.927903508
ENSMUSG00000089719	Gm15758	TSS20701,TSS32342	8:54629054-54887184	-0.380938233	1.368519816	2.700071367	0.100343755	0.927903508
ENSMUSG00000032113	Chek1	TSS19429,TSS22526,TSS27768,TSS28634,TSS28667,TSS38711,TSS4078,TSS7625,TSS76954	9:36708481-36727065	-0.227027495	4.642811485	2.698718856	0.100428918	0.927903508
ENSMUSG00000074743	Thbd	TSS20729	2:148404470-148408188	0.222132423	5.474783094	2.69601624	0.100599329	0.927903508
ENSMUSG00000026280	Atg4b	TSS1157,TSS41142,TSS78895	1:93705390-93789434	0.12211015	5.738598379	2.695824074	0.100611458	0.927903508
ENSMUSG00000055884	Fancm	TSS11435	12:65075605-65132058	-0.160547696	5.119454256	2.69566474	0.100621516	0.927903508
ENSMUSG00000029752	Asns	TSS14294,TSS20523,TSS20791,TSS20792,TSS28708,TSS44469,TSS58121	6:7675168-7693254	0.254825937	3.828034	2.695165838	0.100653016	0.927903508
ENSMUSG00000038517	Tbkbp1	TSS39318,TSS44771,TSS52951,TSS79639,TSS80073	11:97136170-97151495	0.20845656	3.460145264	2.69454909	0.100691971	0.927903508
ENSMUSG00000031605	Klhl2	TSS63977	8:64739862-64849818	0.149775895	4.79271969	2.691530125	0.100882896	0.927903508
ENSMUSG00000032125	Robo4	TSS1691,TSS44017,TSS53551	9:37401896-37414023	0.167768802	4.845647117	2.690166564	0.100969259	0.927903508
ENSMUSG00000020027	Socs2	TSS12200,TSS16475,TSS18003,TSS26881,TSS28694,TSS34247,TSS39619,TSS45654,TSS47596,TSS6,TSS77625,TSS79215	10:95385361-95417180	-0.170573303	5.8658462	2.68968266	0.100999927	0.927903508
ENSMUSG00000020265	Sumo3	TSS17947,TSS41846,TSS423,TSS48399,TSS51365,TSS56766,TSS61443,TSS73676	10:77606096-77645993	0.120133606	6.323440317	2.688803927	0.101055645	0.927903508
ENSMUSG00000014932	Yes1	TSS14773	5:32458973-32687066	0.104777954	6.225129425	2.68814463	0.10109747	0.927903508
ENSMUSG00000039756	Dnttip2	TSS82074	3:122245556-122293547	0.120727305	5.464459369	2.687190384	0.101158041	0.927903508
ENSMUSG00000069308	Hist1h2bp	TSS47792,TSS69464	13:21787460-21789213	-0.570905762	2.139379308	2.687164857	0.101159662	0.927903508
ENSMUSG00000025757	Hspa4l	TSS22291,TSS26356,TSS28775,TSS3161,TSS35989,TSS68300,TSS69736	3:40744494-40796103	-0.100701966	7.287352586	2.687080058	0.101165047	0.927903508
ENSMUSG00000024667	Tmem216	TSS27020,TSS34471,TSS51415	19:10525243-10556238	0.226963448	3.049070744	2.686384694	0.101209213	0.927903508
ENSMUSG00000073131	Vma21	TSS22688,TSS24949,TSS53522,TSS67344	X:71815923-71839757	-0.142249862	5.034809791	2.683866032	0.101369364	0.928147704
ENSMUSG00000033918	Parl	TSS17155,TSS1806,TSS19690,TSS34325,TSS39490,TSS43075,TSS49252,TSS54397,TSS72687,TSS7530	16:20279819-20302387	-0.132069277	5.233808133	2.682535658	0.101454069	0.928147704
ENSMUSG00000004356	Utp20	TSS25171	10:88746606-88826814	-0.102064221	6.255518082	2.681927143	0.101492839	0.928147704
ENSMUSG00000026603	Smyd2	TSS12043,TSS48285,TSS64901,TSS73573	1:189880491-189922363	-0.104004805	7.811733989	2.681534209	0.101517882	0.928147704
ENSMUSG00000005354	Txn2	TSS1154,TSS15100,TSS23110,TSS42026,TSS47081,TSS52138,TSS57497,TSS9995	15:77915046-77929006	-0.115386419	7.062187396	2.680440788	0.101587606	0.928147704
ENSMUSG00000032607	Amt	TSS22,TSS22279,TSS6067,TSS68135	9:108296852-108301571	0.242550623	3.203390195	2.675541712	0.101900647	0.929819956
ENSMUSG00000074505	Fat3	TSS34393	9:15910204-16378231	-0.18031754	5.261013861	2.673229051	0.102048788	0.929819956
ENSMUSG00000039461	Tcta	TSS17948	9:108302958-108305951	0.168478296	4.615086576	2.673168688	0.102052658	0.929819956
ENSMUSG00000020458	Rtn4	TSS17637,TSS31077,TSS31281,TSS33166,TSS42518,TSS66295,TSS66810,TSS78829	11:29692946-30026033	-0.104533366	8.651812967	2.673091817	0.102057586	0.929819956
ENSMUSG00000008540	Mgst1	TSS15116,TSS192,TSS25415,TSS5575,TSS6802,TSS73703,TSS84674	6:138140315-138156755	0.255367391	4.069516018	2.671765228	0.102142677	0.929819956
ENSMUSG00000027939	Nup210l	TSS35339	3:90104131-90212017	0.350305477	1.758649568	2.670334668	0.102234524	0.929819956
ENSMUSG00000031402	Mpp1	TSS17941,TSS33625,TSS34820,TSS41824,TSS57061,TSS65637,TSS79984	X:75095853-75131016	0.136799305	5.033208469	2.669876088	0.102263985	0.929819956
ENSMUSG00000054074	Skida1	TSS15700,TSS19662,TSS40099,TSS42966,TSS67588	2:18040675-18049051	-0.162252157	4.097824319	2.666419129	0.102486377	0.930112503
ENSMUSG00000085623	Gm16041	TSS56520	1:4909575-5070285	-0.227724246	3.206978459	2.666307138	0.10249359	0.930112503
ENSMUSG00000034687	Fras1	TSS8933	5:96373954-96784728	0.227183234	6.849416422	2.6660887	0.102507662	0.930112503
ENSMUSG00000030055	Rab43	TSS31880,TSS61267,TSS65999,TSS77384	6:87788852-87812164	0.142949502	4.554854146	2.663917482	0.102647642	0.930742501
ENSMUSG00000032334	Loxl1	TSS60855	9:58287722-58313212	-0.290418835	4.428675548	2.662815139	0.102718791	0.930747944
ENSMUSG00000053012	Krcc1	TSS56209,TSS63539	6:71213939-71322233	0.113164206	6.208765269	2.660299407	0.102881367	0.931581245
ENSMUSG00000034487	Kdelc2	TSS64722	9:53384022-53401867	0.12854056	5.435156392	2.655272999	0.103207036	0.932940063
ENSMUSG00000023043	Krt18	TSS38840	15:102028215-102032026	0.284873408	2.914482008	2.654691949	0.103244756	0.932940063
ENSMUSG00000074215	Gm10643	TSS78461	8:84063560-84065137	0.339688511	1.593304885	2.654072063	0.103285014	0.932940063
ENSMUSG00000024598	Fbn2	TSS29068	18:58008622-58209926	-0.105827093	8.586346289	2.652026253	0.103417998	0.932940063
ENSMUSG00000063446	E130309F12Rik	TSS22048,TSS38526,TSS52970	4:49059272-49340259	-0.257376944	3.603210442	2.650345196	0.103527413	0.932940063
ENSMUSG00000024621	Csf1r	TSS24035,TSS58636	18:61105571-61177050	0.242601055	4.287186395	2.649967359	0.103552022	0.932940063
ENSMUSG00000031539	Ap3m2	TSS75420	8:22787353-22805654	0.218795301	3.038306911	2.649810367	0.10356225	0.932940063
ENSMUSG00000066800	Rnasel	TSS67991	1:153749425-153764221	0.194939702	6.047188542	2.648386832	0.103655036	0.932940063
ENSMUSG00000002129	Sf3a1	TSS37413,TSS44244,TSS62013	11:4160349-4182541	-0.134320053	6.373715392	2.648190133	0.103667864	0.932940063
ENSMUSG00000025880	Smad7	TSS11394,TSS27767,TSS28287,TSS28820,TSS65856	18:75367528-75395935	0.231991207	5.104829114	2.645567409	0.103839076	0.933438013
ENSMUSG00000023832	Acat2	TSS5632,TSS72735,TSS84468	17:12942889-12960747	-0.268570799	3.454423193	2.643703044	0.10396097	0.933438013
ENSMUSG00000071369	Map3k5	TSS11059,TSS35882,TSS36449,TSS55453,TSS57613,TSS58686,TSS62571	10:19934471-20142753	-0.115459608	6.040509428	2.643338313	0.103984835	0.933438013
ENSMUSG00000028251	2610029I01Rik	TSS16084	4:21727700-21837872	-0.179886039	3.897866548	2.643011766	0.104006206	0.933438013
ENSMUSG00000026197	Zfand2b	TSS28937,TSS44060,TSS60954,TSS60957,TSS6680,TSS78956	1:75168645-75171629	-0.194196665	3.429797506	2.640755499	0.104154003	0.934129006
ENSMUSG00000089682	Bcl2l2	TSS1221,TSS50732,TSS67002,TSS68827	14:54883376-54898169	0.120413458	5.826536725	2.636996573	0.104400744	0.934507828
ENSMUSG00000067158	Col4a4	TSS10498,TSS27550	1:82452557-82586849	0.281042119	2.088019245	2.636854398	0.104410089	0.934507828
ENSMUSG00000022500	Litaf	TSS3750,TSS40530,TSS64895,TSS80019	16:10959274-11066157	0.112862161	5.878116337	2.635820606	0.104478067	0.934507828
ENSMUSG00000019853	Hebp2	TSS62086	10:18540122-18546076	0.282414587	2.651829918	2.635522548	0.104497675	0.934507828
ENSMUSG00000038515	Grtp1	TSS3518	8:13176868-13200624	-0.271118615	2.353339721	2.634519992	0.104563659	0.934507828
ENSMUSG00000006732	Mettl1	TSS12213,TSS3517,TSS63587,TSS79149,TSS79152	10:127031181-127046365	-0.191752252	3.931820893	2.633645628	0.104621243	0.934507828
ENSMUSG00000025381	Cnpy2	TSS84267	10:128322458-128327187	0.130938495	5.347980389	2.630078053	0.104856559	0.935976034
ENSMUSG00000036854	Hspb6	TSS16638,TSS27043,TSS4439,TSS63815	7:30539133-30559838	-0.117217134	5.495100012	2.622651201	0.105348292	0.938107502
ENSMUSG00000033216	Eefsec	TSS73560	6:88257333-88446539	0.192934044	3.805719345	2.622608402	0.105351133	0.938107502
ENSMUSG00000014813	Stc1	TSS36203	14:69029288-69041401	0.287322816	3.526897727	2.622003039	0.105391327	0.938107502
ENSMUSG00000024845	Tmem134	TSS21928,TSS31572,TSS42804,TSS48069,TSS59660,TSS7115,TSS85844,TSS85850,TSS9242	19:4125933-4132307	-0.111209737	5.716908808	2.621373212	0.105433163	0.938107502
ENSMUSG00000052353	9930013L23Rik	TSS36154,TSS51521,TSS80964	7:83932856-84086502	0.259433631	2.606339713	2.620682629	0.105479055	0.938107502
ENSMUSG00000046997	Spsb4	TSS30631,TSS3395,TSS48040,TSS56241	9:96943481-97022043	-0.201375104	4.993130355	2.619741925	0.105541605	0.938107502
ENSMUSG00000030254	Rad18	TSS12002,TSS2491,TSS34587,TSS47070,TSS56717,TSS56726,TSS66379,TSS74087	6:112619849-112696686	-0.187915405	4.214860632	2.618653303	0.10561404	0.938107502
ENSMUSG00000032558	Nphp3	TSS19982,TSS19983,TSS26347,TSS31959,TSS41581	9:104002543-104127463	0.17483102	3.965018149	2.617899988	0.105664197	0.938107502
ENSMUSG00000050856	Atp5k	TSS39601,TSS58844	5:108433243-108434448	-0.115245549	7.991491419	2.612522501	0.106022995	0.940613831
ENSMUSG00000038781	Stap2	TSS7955	17:55997080-56005570	0.237306124	3.308344805	2.609963029	0.106194238	0.940613831
ENSMUSG00000036061	Smug1	TSS44174	15:103153306-103158002	-0.14950434	4.444998215	2.609279541	0.106240019	0.940613831
ENSMUSG00000043602	Zfp3	TSS34295	11:70764208-70772928	0.194182577	3.451987239	2.608112013	0.10631827	0.940613831
ENSMUSG00000086503	Xist	TSS55571,TSS8995	X:103431516-103484957	-0.813270121	1.880606381	2.607950018	0.106329133	0.940613831
ENSMUSG00000059588	Calcrl	TSS19423,TSS49580,TSS83364	2:84330625-84425411	0.148674437	6.525692893	2.607276967	0.106374277	0.940613831
ENSMUSG00000040212	Emp3	TSS48516,TSS59094	7:45918022-45921426	0.207511617	3.446549886	2.601456025	0.106765588	0.943441659
ENSMUSG00000021262	Evl	TSS1143,TSS33398,TSS55508	12:108370956-108702306	-0.137632645	4.608445608	2.598407062	0.106971183	0.94403649
ENSMUSG00000079553	Kifc1	TSS15108,TSS35732,TSS36261,TSS59494,TSS66761,TSS69134,TSS69136	17:33875665-33890661	-0.201390683	4.526623451	2.598335495	0.106976014	0.94403649
ENSMUSG00000017493	Igfbp4	TSS10214,TSS27792,TSS28766,TSS41555,TSS54150,TSS61553	11:99041243-99054392	0.140672477	6.790828943	2.592117263	0.107396686	0.94658857
ENSMUSG00000056091	St3gal5	TSS9125	6:72097612-72154570	-0.148551143	5.043203571	2.591571393	0.107433701	0.94658857
ENSMUSG00000089940	Gm4117	TSS69327,TSS69329	13:89655311-90143907	-0.1877408	7.267601608	2.58912441	0.107599803	0.94658857
ENSMUSG00000000711	Rab5b	TSS48826	10:128677192-128696268	0.100108609	6.53976329	2.586604225	0.107771169	0.94658857
ENSMUSG00000009907	Vps4b	TSS10668,TSS23827,TSS31522,TSS5799,TSS84199	1:106764070-106796728	0.098691955	6.417699533	2.585791169	0.107826519	0.94658857
ENSMUSG00000021614	Vcan	TSS1947,TSS31545,TSS52919,TSS59182,TSS59522,TSS64535,TSS81832,TSS9062,TSS9397	13:89655311-90143907	-0.105521033	9.003499199	2.585731523	0.10783058	0.94658857
ENSMUSG00000097322	AC125374.1	TSS7960,TSS84498	9:122885079-122903184	0.38307912	1.456697303	2.585122035	0.107872094	0.94658857
ENSMUSG00000005465	Il27ra	TSS25116	8:84021470-84042575	0.244875954	2.620483234	2.584242168	0.107932055	0.94658857
ENSMUSG00000020775	Mrpl38	TSS24839,TSS35983,TSS39694,TSS62854,TSS63864,TSS65096	11:116131816-116138868	-0.129896473	5.580599389	2.582900044	0.108023588	0.94658857
ENSMUSG00000020715	Ern1	TSS12440,TSS22459,TSS36646,TSS69676,TSS73721	11:106394649-106487852	0.171405139	4.435998137	2.581149285	0.108143118	0.94658857
ENSMUSG00000053441	Adamts19	TSS45749	18:58836763-59053678	0.141209653	5.521074479	2.576863503	0.108436335	0.94658857
ENSMUSG00000035861	Tmprss11bnl	TSS72653	5:86657630-86676362	-0.394054608	1.203765333	2.576451001	0.108464603	0.94658857
ENSMUSG00000042436	Mfap4	TSS16241,TSS39702,TSS66308,TSS73605	11:61485430-61494406	0.180766561	4.323294238	2.573416589	0.108672794	0.94658857
ENSMUSG00000032782	Cntrob	TSS16237,TSS17076,TSS19030,TSS26757,TSS39874,TSS46422,TSS78252,TSS78348,TSS84235	11:69299486-69323775	0.166737196	4.847596818	2.569173281	0.108964664	0.94658857
ENSMUSG00000075033	Nxpe3	TSS6319	16:55839952-55895279	-0.418662947	1.282710774	2.569122417	0.108968168	0.94658857
ENSMUSG00000042804	Gpr153	TSS25632,TSS27402,TSS39608,TSS84050	4:152274231-152285337	-0.156727611	5.081690638	2.568254167	0.109027997	0.94658857
ENSMUSG00000039787	Cercam	TSS11166,TSS1876,TSS449,TSS49951,TSS76534	2:29868725-29882840	0.196490036	3.624650379	2.567024776	0.109112774	0.94658857
ENSMUSG00000028601	Echdc2	TSS13519,TSS28852,TSS40832,TSS55631,TSS62035,TSS64166,TSS64229,TSS66927,TSS67058,TSS68609,TSS68849,TSS75462	4:108165436-108179308	0.189060496	4.087871505	2.566614908	0.109141054	0.94658857
ENSMUSG00000020843	Timm22	TSS35269,TSS58073,TSS77945,TSS84898	11:76406951-76416292	-0.146608113	5.003066852	2.564982146	0.109253791	0.94658857
ENSMUSG00000025813	Homer2	TSS2511,TSS38687	7:81600480-81706925	-0.132241059	6.788873387	2.562909913	0.109397056	0.94658857
ENSMUSG00000020153	Ndufs7	TSS39511,TSS45354,TSS45774,TSS61825,TSS66648,TSS8296	10:80249120-80256794	-0.178367374	6.682911212	2.561373125	0.109503436	0.94658857
ENSMUSG00000024194	Cuta	TSS36931,TSS68168	17:26937972-26939478	-0.147413504	4.58237166	2.557364711	0.109781444	0.94658857
ENSMUSG00000006219	Fblim1	TSS11350,TSS16131,TSS20624,TSS23960,TSS27418,TSS28159,TSS28986,TSS33704,TSS45715,TSS51802,TSS53842,TSS60164,TSS81123,TSS84530	4:141576061-141606096	0.12078259	5.180708062	2.55659177	0.109835141	0.94658857
ENSMUSG00000028024	Enpep	TSS32329,TSS34666,TSS41168,TSS71973	3:129269174-129332720	0.194191955	4.903949831	2.554903382	0.109952536	0.94658857
ENSMUSG00000021476	Habp4	TSS12162	13:64161865-64186536	-0.131621762	6.508325237	2.550981196	0.110225782	0.94658857
ENSMUSG00000040451	Sgms1	TSS16681,TSS17563,TSS20906,TSS4074,TSS4174,TSS45685,TSS48225,TSS50319,TSS50856,TSS70912,TSS78355,TSS80636,TSS9499,TSS9645	19:32122726-32391184	0.120683427	6.45719773	2.549290244	0.110343815	0.94658857
ENSMUSG00000048218	Amigo2	TSS11977	15:97244073-97385689	0.244769197	2.930454799	2.54841647	0.110404862	0.94658857
ENSMUSG00000051149	Adnp	TSS1655,TSS47696,TSS7663	2:168180985-168230591	-1.068056631	2.265978139	2.547189624	0.110490638	0.94658857
ENSMUSG00000027808	Serp1	TSS62272	3:58521968-58557501	0.115737333	6.675351765	2.546969432	0.110506041	0.94658857
ENSMUSG00000049107	Ntf3	TSS40019	6:126101412-126166744	0.373042144	1.529480503	2.546359586	0.110548713	0.94658857
ENSMUSG00000024883	Rin1	TSS86119	19:5050807-5057071	0.345709633	1.693355968	2.54607827	0.110568403	0.94658857
ENSMUSG00000017615	Tnfaip1	TSS78603,TSS79821	11:78522849-78536332	0.091994601	7.15826465	2.545222803	0.110628304	0.94658857
ENSMUSG00000036371	Serbp1	TSS48317	6:67266978-67289302	-0.113889421	8.789393299	2.543922883	0.110719394	0.94658857
ENSMUSG00000067194	Eif1ax	TSS62759	X:159372177-159389928	-0.104279456	7.177527292	2.543192682	0.110770599	0.94658857
ENSMUSG00000022899	Slc15a2	TSS12557,TSS25973,TSS40995,TSS43984,TSS44133,TSS45743,TSS519,TSS55532,TSS59377,TSS62499,TSS67617,TSS6956,TSS6997,TSS82599	16:36750177-36784962	-0.820985709	1.609138917	2.542662692	0.11080778	0.94658857
ENSMUSG00000064370	mt-Cytb	TSS30452	MT:14144-15288	-0.158968644	11.93578492	2.541618904	0.110881046	0.94658857
ENSMUSG00000090088	Gm15934	TSS21780	10:45178097-45318452	0.394729136	1.632656262	2.53978646	0.111009799	0.94658857
ENSMUSG00000020116	Pno1	TSS29835,TSS66388	11:17159262-17233796	-0.187764405	4.725980335	2.539019631	0.111063727	0.94658857
ENSMUSG00000020831	0610010K14Rik	TSS23170,TSS24698,TSS2636,TSS39196,TSS44980,TSS44982,TSS46626,TSS74364,TSS76867,TSS76869,TSS82304,TSS82500	11:70235205-70239842	0.182318233	4.098172458	2.538418012	0.111106057	0.94658857
ENSMUSG00000027076	Timm10	TSS28090,TSS9562	2:84826996-84830213	-0.145026236	5.376820514	2.53699494	0.111206256	0.94658857
ENSMUSG00000045625	Pigz	TSS41375,TSS55261,TSS66105,TSS69833	16:31933850-31946046	0.374862287	1.220519418	2.536945332	0.11120975	0.94658857
ENSMUSG00000031246	Sh3bgrl	TSS23248,TSS31142,TSS71852	X:109095364-109200439	0.112217124	6.640068636	2.536554384	0.111237295	0.94658857
ENSMUSG00000012114	Med15	TSS52713	16:17651220-17722930	0.153130256	4.329879443	2.535939618	0.111280625	0.94658857
ENSMUSG00000055214	Pld5	TSS16879,TSS59033,TSS66257,TSS75122,TSS76528,TSS84298	1:175962305-176275312	-0.430521092	1.039938235	2.534572722	0.111377032	0.94658857
ENSMUSG00000005251	Ripk4	TSS14218,TSS32304	16:97741932-97763737	0.306683231	2.134811048	2.53434497	0.111393105	0.94658857
ENSMUSG00000020808	Fam64a	TSS38945,TSS42705,TSS54379,TSS7426,TSS84343	11:72042031-72047370	-0.151855872	5.092621555	2.53404118	0.111414547	0.94658857
ENSMUSG00000034708	Grn	TSS18544,TSS39785,TSS40321,TSS42608,TSS42615,TSS46656,TSS69554,TSS73268,TSS76280,TSS79990	11:102430314-102447682	0.13488092	6.742969775	2.532911887	0.111494295	0.94658857
ENSMUSG00000035164	Zc3h12c	TSS61742	9:52111984-52168111	-0.125671264	5.461786582	2.532873731	0.111496991	0.94658857
ENSMUSG00000090278	D130062J21Rik	TSS46274	4:32238803-32586108	-0.385404176	1.313204484	2.53160067	0.111586969	0.94658857
ENSMUSG00000028229	Fam82b	TSS1674,TSS5907	4:19575161-19708993	-0.118987046	5.225631072	2.531241791	0.111612349	0.94658857
ENSMUSG00000004631	Sgce	TSS24380,TSS25608,TSS3516,TSS40497,TSS46705,TSS64828,TSS71773,TSS75505	6:4674349-4747204	0.128202389	5.008009571	2.529172322	0.111758824	0.94658857
ENSMUSG00000032816	Igdcc4	TSS16984,TSS70166	9:65101485-65137940	0.183578131	4.214395888	2.528275802	0.111822344	0.94658857
ENSMUSG00000054967	Zfp647	TSS42644	15:76910850-76918010	0.357631024	1.751690326	2.528244098	0.111824591	0.94658857
ENSMUSG00000041695	Kcnj2	TSS43111	11:111066163-111076821	0.135330143	6.892057699	2.528213102	0.111826788	0.94658857
ENSMUSG00000023951	Vegfa	TSS20169,TSS21074,TSS23138,TSS37319,TSS40315,TSS49496,TSS72917,TSS83489	17:46016992-46032377	0.137481531	8.313947858	2.528094566	0.11183519	0.94658857
ENSMUSG00000097204	AC092094.1	TSS63013	3:96162003-96177564	0.232251481	3.070961332	2.52754559	0.111874111	0.94658857
ENSMUSG00000033871	Ppargc1b	TSS60717,TSS77523	18:61298135-61400431	-0.139790319	5.598334716	2.527312361	0.111890651	0.94658857
ENSMUSG00000062151	Unc13c	TSS78489	9:73480869-73933567	0.210016495	4.034825958	2.526759967	0.111929835	0.94658857
ENSMUSG00000044519	Zfp488	TSS36035	14:33967069-33978764	-0.20101139	6.401102239	2.525843767	0.11199486	0.94658857
ENSMUSG00000086782	E130102H24Rik	TSS79063	4:101346530-101399181	0.475761884	1.138625128	2.524967224	0.112057109	0.94658857
ENSMUSG00000057858	D19Ertd737e	TSS33977	19:60198585-60227678	0.157871759	4.181078233	2.524883677	0.112063044	0.94658857
ENSMUSG00000020522	Mfap3	TSS20563,TSS35038,TSS35039,TSS9692	11:57518663-57533815	0.102431074	5.845146596	2.522525345	0.112230724	0.94658857
ENSMUSG00000026688	Mgst3	TSS62211	1:167371965-167393841	-0.102754571	6.576420923	2.521955544	0.112271279	0.94658857
ENSMUSG00000069274	Hist1h4f	TSS10449	13:23551257-23551648	-0.362387519	3.949671962	2.520131605	0.112401204	0.94658857
ENSMUSG00000029134	Plb1	TSS170,TSS31566,TSS31576,TSS32036,TSS32040,TSS38065,TSS44741,TSS84884	5:32232707-32366520	-0.30215914	1.724259254	2.518796065	0.112496443	0.94658857
ENSMUSG00000028698	Pik3r3	TSS34239,TSS63148,TSS66226	4:116221617-116303056	0.112598108	5.60411632	2.518165075	0.112541471	0.94658857
ENSMUSG00000042272	Sestd1	TSS2177,TSS27490,TSS62170,TSS7859	2:77180339-77280592	0.110711665	5.829150435	2.517394222	0.112596507	0.94658857
ENSMUSG00000025855	Prkar1b	TSS13014,TSS16093,TSS29345,TSS3107,TSS36446,TSS38033,TSS53438,TSS62254,TSS78,TSS81975,TSS82757	5:139017305-139186510	0.304613186	2.060607373	2.516091753	0.112689565	0.94658857
ENSMUSG00000035493	Tgfbi	TSS71660	13:56609602-56639339	0.206681751	5.16771063	2.514063685	0.112834634	0.94658857
ENSMUSG00000026766	Mmadhc	TSS14802,TSS22130,TSS27451,TSS38375,TSS4944,TSS6188,TSS62535,TSS76340	2:50279880-50296801	-0.109544151	6.420043176	2.513792174	0.112854071	0.94658857
ENSMUSG00000009292	Trpm2	TSS17143,TSS24799,TSS30804,TSS33816,TSS38284,TSS43225,TSS85388,TSS8797	10:77907721-77970563	0.42011164	1.268930817	2.512731262	0.112930055	0.94658857
ENSMUSG00000026154	1110058L19Rik	TSS47000	1:23995938-24005894	0.190695135	3.772629398	2.512040006	0.112979594	0.94658857
ENSMUSG00000015749	Anp32e	TSS13481,TSS2075,TSS21082,TSS21306,TSS349,TSS52155,TSS56386,TSS6002,TSS79497,TSS84066	3:95929245-95947390	-0.12083454	7.499806208	2.511486535	0.113019276	0.94658857
ENSMUSG00000041741	Pde3a	TSS11550	6:141249268-141499351	0.11911565	5.948205123	2.510982948	0.113055395	0.94658857
ENSMUSG00000017760	Ctsa	TSS13102,TSS183,TSS22836,TSS27916,TSS33088,TSS49960,TSS54398,TSS59721,TSS67363,TSS77539,TSS81965,TSS81970,TSS8396,TSS9669	2:164830731-164857711	0.120611555	7.190117451	2.510391352	0.113097842	0.94658857
ENSMUSG00000042606	Hirip3	TSS29638,TSS51205,TSS51206,TSS59176,TSS71575,TSS71945	7:126847415-126865377	-0.162471979	4.970831142	2.509404573	0.113168683	0.94658857
ENSMUSG00000028048	Gba	TSS32052,TSS62088	3:89202927-89208681	0.175469407	4.348126503	2.50870616	0.113218852	0.94658857
ENSMUSG00000014418	Hps5	TSS12177,TSS17056,TSS23659,TSS33492,TSS64920,TSS65407,TSS66104,TSS69804,TSS7201,TSS84437,TSS84913,TSS85840	7:46760465-46796064	0.12834998	4.917712465	2.508515989	0.113232517	0.94658857
ENSMUSG00000079737	3110001I22Rik	TSS31344	16:13671857-13703612	0.281562148	2.082471997	2.504568561	0.113516569	0.94658857
ENSMUSG00000021938	Pspc1	TSS28913,TSS73820,TSS76157	14:56722440-56778316	-0.104378272	5.717685398	2.503111558	0.113621611	0.94658857
ENSMUSG00000058833	2810428I15Rik	TSS1846,TSS22961,TSS30262,TSS34505,TSS38667,TSS74879,TSS77158,TSS98	8:70504291-70506752	-0.368356805	3.054820349	2.500288309	0.113825459	0.94658857
ENSMUSG00000095403	AC240744.1	TSS18686,TSS58266	8:20550330-20581999	-0.17923603	3.483863158	2.499866374	0.113855958	0.94658857
ENSMUSG00000073096	Lrrc61	TSS13439,TSS25815,TSS72948,TSS81061	6:48554795-48572670	0.247966243	2.473811899	2.499059916	0.113914278	0.94658857
ENSMUSG00000078867	Gm14418	TSS2171,TSS24168,TSS62197	2:177387123-177398320	0.368133804	1.180536769	2.498562207	0.113950287	0.94658857
ENSMUSG00000024870	Rab1b	TSS772	19:5099206-5106996	-0.107995749	6.523937157	2.497768173	0.114007761	0.94658857
ENSMUSG00000042670	Immp1l	TSS63494	2:105904637-105965558	-0.170444175	4.620387597	2.49662019	0.11409091	0.94658857
ENSMUSG00000079436	Kcnj13	TSS41533,TSS79823	1:87326997-87450796	-0.437142513	1.401649259	2.495822344	0.114148738	0.94658857
ENSMUSG00000097317	AL691450.1	TSS58818	2:91250742-91264679	-0.277326977	2.89313561	2.495439413	0.114176505	0.94658857
ENSMUSG00000031312	Itgb1bp2	TSS14342,TSS16764	X:101449087-101453541	-0.105873595	7.115108901	2.494512812	0.114243724	0.94658857
ENSMUSG00000036327	Qsox2	TSS15609,TSS27458	2:26208636-26237525	0.164654308	4.662971307	2.492251052	0.114407984	0.94658857
ENSMUSG00000032186	Tmod2	TSS34225,TSS67803,TSS71261	9:75565620-75611325	0.212423473	3.70456011	2.490519431	0.114533918	0.94658857
ENSMUSG00000019461	Plscr3	TSS65541,TSS79250,TSS84684	11:69846375-69858730	0.160963718	4.343771938	2.48909839	0.11463738	0.94658857
ENSMUSG00000031652	N4bp1	TSS78226	8:86841138-86885258	0.114775273	5.735232958	2.488331229	0.114693277	0.94658857
ENSMUSG00000050192	Eif5a2	TSS65003	3:28781310-28798846	0.178271366	4.98174971	2.486860723	0.114800506	0.94658857
ENSMUSG00000032400	Zwilch	TSS13293,TSS18624,TSS24516,TSS24517,TSS31532,TSS35136,TSS376,TSS49879,TSS60021,TSS68222,TSS79920,TSS79922,TSS913	9:64117146-64173104	-0.152307314	4.796774775	2.483084042	0.115076408	0.94658857
ENSMUSG00000052419	2610001J05Rik	TSS47315,TSS57113	6:13867734-13871518	-0.137143404	4.993956434	2.482484322	0.115120288	0.94658857
ENSMUSG00000006800	Sulf2	TSS19759,TSS49436,TSS506,TSS69872,TSS80554,TSS84851,TSS8963	2:165992635-166155663	-0.104087176	7.587150304	2.478166913	0.115436722	0.94658857
ENSMUSG00000037936	Scarb1	TSS12016,TSS29454,TSS32073,TSS32550,TSS38858,TSS42129,TSS47998,TSS66835,TSS69500,TSS71360	5:125277086-125341094	-0.122492757	5.455291406	2.477037493	0.115519658	0.94658857
ENSMUSG00000084950	Gm5577	TSS71440,TSS71496	6:87980421-88045270	-0.362738056	1.68607071	2.475304208	0.115647066	0.94658857
ENSMUSG00000084780	Gm15350	TSS13984,TSS40817	8:12757013-13020905	0.228852534	3.021270397	2.473679174	0.115766657	0.94658857
ENSMUSG00000022449	Adamts20	TSS20094,TSS26959,TSS31158	15:94270162-94465418	0.370014336	1.589300508	2.4735476	0.115776346	0.94658857
ENSMUSG00000011096	Akt1s1	TSS11749,TSS11807,TSS20104,TSS20632,TSS39974,TSS40878,TSS41346,TSS60027,TSS60448,TSS73184,TSS74893	7:44840900-44855421	-0.190424594	4.848872049	2.470794746	0.115979268	0.94658857
ENSMUSG00000053684	BC048403	TSS33266,TSS65824,TSS69422	10:121739936-121752878	-0.388671123	1.074146022	2.46899105	0.116112437	0.94658857
ENSMUSG00000022906	Parp9	TSS2215,TSS39714,TSS4584,TSS57822,TSS65533,TSS68367,TSS77931	16:35926510-36037131	-0.190425328	4.869989365	2.468289323	0.116164293	0.94658857
ENSMUSG00000029465	Arpc3	TSS11330,TSS12601,TSS25185,TSS6274,TSS69917,TSS78331,TSS82479	5:122391877-122406179	0.101791768	6.390104534	2.467339988	0.116234486	0.94658857
ENSMUSG00000030342	Cd9	TSS67323,TSS74666,TSS85104	6:125460265-125509135	0.163706896	5.220040112	2.467246021	0.116241436	0.94658857
ENSMUSG00000031007	Atp6ap2	TSS19913	X:12587800-12617049	0.12341667	5.361863029	2.467237627	0.116242057	0.94658857
ENSMUSG00000061207	Stk19	TSS15166,TSS21722,TSS29263,TSS40358,TSS44050,TSS45199,TSS61462,TSS8434	17:34823992-34836945	0.284337698	2.61767658	2.465561106	0.116366141	0.94658857
ENSMUSG00000029381	Shroom3	TSS27227,TSS39754,TSS40644,TSS42551,TSS63638,TSS6544,TSS81585	5:92683434-92965318	-0.126212069	6.417404472	2.464503843	0.116444467	0.94658857
ENSMUSG00000074738	B930041F14Rik	TSS69992	4:155694341-155696481	0.421090657	1.229371416	2.462806071	0.116570366	0.94658857
ENSMUSG00000043445	Pgp	TSS30274	17:24470472-24471591	-0.219718049	3.63346687	2.462729586	0.116576042	0.94658857
ENSMUSG00000085118	Gm15774	TSS39907	7:120842830-120907219	0.366466308	1.984644853	2.461840084	0.116642067	0.94658857
ENSMUSG00000022359	Wdyhv1	TSS76936	15:58141435-58158652	-0.231278366	3.247409565	2.460903455	0.116711635	0.94658857
ENSMUSG00000001150	Mcm3ap	TSS51741	10:76449080-76515856	0.103256165	6.177476952	2.460056418	0.116774588	0.94658857
ENSMUSG00000020857	Nme2	TSS64138,TSS81961	11:93949813-93968521	-0.105291437	8.355859294	2.459925275	0.116784338	0.94658857
ENSMUSG00000020836	Coro6	TSS17953,TSS20982,TSS5273,TSS68494	11:77462410-77470484	-0.106212744	6.548060111	2.458971815	0.116855252	0.94658857
ENSMUSG00000028978	Nos3	TSS71567	5:24364809-24392143	0.146467665	5.522611928	2.457835984	0.116939792	0.94658857
ENSMUSG00000022508	Bcl6	TSS2457,TSS36169	16:23965051-23988852	0.397859053	1.126758653	2.456260924	0.117057135	0.94658857
ENSMUSG00000025019	Lcor	TSS40271,TSS69792	19:41482644-41562246	-0.160093535	5.385873929	2.454347691	0.117199848	0.94658857
ENSMUSG00000023967	Mrps18a	TSS1340,TSS1341,TSS33238,TSS50565,TSS60336,TSS81221	17:46110985-46144216	-0.123480349	5.387856135	2.4537547	0.117244119	0.94658857
ENSMUSG00000020553	Pctp	TSS261	11:89982664-90002894	0.199434323	3.435967784	2.453229825	0.117283321	0.94658857
ENSMUSG00000044595	Dnd1	TSS26158,TSS79240	18:36760238-36766214	0.426816292	1.296585031	2.451007198	0.117449484	0.94658857
ENSMUSG00000045438	Cox19	TSS24556,TSS24558,TSS54179,TSS66168,TSS83776	5:139336188-139345233	-0.125740559	4.856527297	2.450561792	0.117482814	0.94658857
ENSMUSG00000040054	Baz2a	TSS18331	10:128092782-128129303	0.109945314	6.223693537	2.449807703	0.117539267	0.94658857
ENSMUSG00000061859	Inadl	TSS17721,TSS18129,TSS19300,TSS26599,TSS37447,TSS42268,TSS52480,TSS55952,TSS6581,TSS72526,TSS76021,TSS79776	4:98395784-98719603	0.133157545	5.196961789	2.44874245	0.117619064	0.94658857
ENSMUSG00000051169	Rpusd3	TSS27028,TSS50648,TSS53253,TSS60237,TSS60239,TSS60241,TSS82541	6:113415318-113419348	0.291624169	2.24518459	2.448275844	0.117654037	0.94658857
ENSMUSG00000089817	Gm7162	TSS71523	17:12682405-12868143	0.191517262	3.715177717	2.447809082	0.117689032	0.94658857
ENSMUSG00000032783	Troap	TSS65819	15:99074972-99083407	-0.185329981	3.623341586	2.447290946	0.117727893	0.94658857
ENSMUSG00000039713	Plekhg5	TSS1403,TSS3092,TSS31196,TSS50269,TSS59322,TSS67167	4:152072497-152115400	0.212704032	4.269969297	2.446080858	0.117818705	0.94658857
ENSMUSG00000027673	Ndufb5	TSS11870,TSS16931,TSS16932,TSS18272,TSS60075,TSS60366,TSS80704	3:32708545-32751566	-0.099152175	7.864319863	2.445884598	0.117833441	0.94658857
ENSMUSG00000058587	Tmod3	TSS58817	9:75497795-75559657	0.115728615	6.921578883	2.445639006	0.117851884	0.94658857
ENSMUSG00000078716	Tmem8b	TSS17915,TSS35891,TSS43241,TSS44083,TSS48454,TSS5282,TSS53712,TSS65719,TSS80126	4:43659621-43692668	0.231252627	3.321074698	2.443220494	0.118033673	0.94658857
ENSMUSG00000043635	Adamts3	TSS55041	5:89673840-89883334	-0.164252324	4.109762179	2.442103474	0.11811774	0.94658857
ENSMUSG00000027255	Arfgap2	TSS18958,TSS25576,TSS46978,TSS50919,TSS61257,TSS67226,TSS72077	2:91264973-91444704	-0.139679324	5.177234419	2.441968181	0.118127926	0.94658857
ENSMUSG00000005973	Rcn1	TSS6123,TSS63453	2:105386290-105399319	0.132170429	6.602224062	2.441310093	0.118177489	0.94658857
ENSMUSG00000033722	BC034090	TSS16748	1:155212473-155232724	-0.107334745	6.025131876	2.440482562	0.118239846	0.94658857
ENSMUSG00000089706	B230216N24Rik	TSS1050,TSS11864,TSS4391,TSS83247	1:97795113-98095646	-0.229978557	3.143014918	2.44020221	0.11826098	0.94658857
ENSMUSG00000039706	Ldb2	TSS47863	5:44472132-44799707	0.190321462	4.104773835	2.440118902	0.118267261	0.94658857
ENSMUSG00000046714	Foxc2	TSS38795	8:119910359-124345724	0.380881523	1.253634058	2.43671311	0.118524347	0.94658857
ENSMUSG00000032932	Hspa13	TSS21710,TSS21749,TSS53695	16:75755189-75766821	0.132160262	5.633465349	2.43636389	0.118550743	0.94658857
ENSMUSG00000069920	B3gnt9-ps	TSS85918,TSS85925	8:105225144-105255153	-0.195016721	3.343415548	2.432409896	0.11885006	0.94658857
ENSMUSG00000024357	Sil1	TSS23246	18:35266399-35498925	0.190397757	4.071457769	2.432055655	0.118876917	0.94658857
ENSMUSG00000040466	Blvrb	TSS15877,TSS30994,TSS50328,TSS6891,TSS83775	7:27447977-27466144	0.225324031	3.321095485	2.430551028	0.118991065	0.94658857
ENSMUSG00000037214	Thap1	TSS41590,TSS47654,TSS63931	8:26158211-26162940	-0.269715894	2.52538319	2.430157128	0.119020968	0.94658857
ENSMUSG00000020467	Efemp1	TSS2479,TSS33768,TSS44041	11:28853203-28926743	0.228129793	3.746936487	2.42932434	0.119084217	0.94658857
ENSMUSG00000016984	Etaa1	TSS10202	11:17938755-17953875	-0.16213033	4.458946549	2.428932399	0.119113997	0.94658857
ENSMUSG00000035683	Melk	TSS20284,TSS22841,TSS24549	4:44300875-44364675	-0.196983316	5.073172263	2.42806777	0.119179721	0.94658857
ENSMUSG00000026180	Cxcr2	TSS47076,TSS82816	1:74153988-74161238	-0.238309121	2.83448227	2.427322513	0.119236404	0.94658857
ENSMUSG00000057880	Abat	TSS19263,TSS32023,TSS4822,TSS4823,TSS4825,TSS60524,TSS65666	16:8513428-8621568	-0.143828699	5.9249943	2.427022281	0.119259248	0.94658857
ENSMUSG00000027715	Ccna2	TSS28170,TSS58455,TSS66258,TSS72837	3:36552605-36572150	-0.102610936	7.978557312	2.424790182	0.119429232	0.94658857
ENSMUSG00000021895	Arhgef3	TSS23769	14:27238038-27403904	0.107673578	5.639671896	2.4239846	0.119490646	0.94658857
ENSMUSG00000044794	9330133O14Rik	TSS41954	8:119910359-124345724	-0.279610799	2.896357278	2.421087196	0.119711822	0.94658857
ENSMUSG00000078995	Zfp456	TSS51187,TSS70003	13:67312997-67375810	0.298332564	2.423314056	2.421008596	0.119717828	0.94658857
ENSMUSG00000041688	Amot	TSS12945,TSS1711,TSS19542,TSS21787,TSS22833,TSS67472	X:145446424-145505181	0.176237708	4.271322384	2.420930315	0.11972381	0.94658857
ENSMUSG00000030247	Kcnj8	TSS53305	6:142564938-142571356	0.166430892	4.621276786	2.420843882	0.119730416	0.94658857
ENSMUSG00000040310	Alx4	TSS11580,TSS1961	2:93642383-93681339	-0.396499461	1.137037165	2.420703564	0.11974114	0.94658857
ENSMUSG00000085847	Gm14540	TSS1047	6:32790975-33060260	-0.242086205	3.555162364	2.419653986	0.119821394	0.94658857
ENSMUSG00000006445	Epha2	TSS16168,TSS36181,TSS64688,TSS8941	4:141301239-141329384	0.213874279	3.898276077	2.419501652	0.119833047	0.94658857
ENSMUSG00000019066	Rab3d	TSS25945,TSS3695,TSS57910,TSS59104,TSS79543	9:21907490-21918192	0.212778773	3.666125473	2.418919927	0.119877558	0.94658857
ENSMUSG00000030245	Golt1b	TSS55531,TSS65183	6:142387220-142403858	-0.118911179	5.504357788	2.417105546	0.120016504	0.94658857
ENSMUSG00000020739	Nup85	TSS11636,TSS26354,TSS27554,TSS34309,TSS36585,TSS53433,TSS59549,TSS67442,TSS75488	11:115564433-115583985	-0.151611284	5.982877262	2.415940093	0.120105848	0.94658857
ENSMUSG00000028268	Gbp3	TSS36364,TSS36369,TSS4472,TSS4626,TSS61138,TSS75898	3:142560051-142573209	-0.552239152	3.632924778	2.41575833	0.120119789	0.94658857
ENSMUSG00000086189	Gm15462	TSS28666	3:30679057-30699843	-0.338258499	1.661932993	2.415229169	0.120160384	0.94658857
ENSMUSG00000051220	Ercc6l	TSS57102	X:102141715-102157091	-0.160911334	5.220991929	2.414309493	0.120230975	0.94658857
ENSMUSG00000029642	Polr1d	TSS52916,TSS67540	5:147077049-147111361	-0.12074175	5.189694684	2.413809868	0.120269343	0.94658857
ENSMUSG00000034620	Tmem5	TSS13346,TSS18310,TSS19803,TSS22598,TSS36553,TSS50304	10:122078113-122097371	-0.138145385	4.861486919	2.413419989	0.120299293	0.94658857
ENSMUSG00000024856	Cdk2ap2	TSS1799,TSS72224,TSS83580	19:4097181-4099019	-0.286191448	3.911093681	2.412835237	0.120344228	0.94658857
ENSMUSG00000018858	Ict1	TSS25507,TSS25511,TSS45321,TSS47303,TSS47831,TSS47835,TSS49168,TSS52409,TSS79731,TSS8486	11:115403751-115412674	-0.125949972	5.315628804	2.412423156	0.120375906	0.94658857
ENSMUSG00000022186	Oxct1	TSS2074,TSS22518,TSS28877,TSS46191,TSS80356	15:4021685-4155344	-0.122039795	9.490175783	2.411192918	0.120470532	0.94658857
ENSMUSG00000028023	Pitx2	TSS15561,TSS22677,TSS26245,TSS33063,TSS40991,TSS74677,TSS82360,TSS8379	3:129199877-129219591	0.594701921	1.859514906	2.407742447	0.120736371	0.94658857
ENSMUSG00000038086	Hspb2	TSS56971	9:50751071-50752354	-0.186979855	5.538664521	2.406718995	0.120815347	0.94658857
ENSMUSG00000021704	Mtx3	TSS37545	13:92844786-92858230	-0.109212977	6.270419249	2.40602743	0.120868745	0.94658857
ENSMUSG00000047238	Mageh1	TSS9794	X:153036165-153037563	0.201689059	3.653689753	2.403802089	0.121040748	0.94658857
ENSMUSG00000031483	Erlin2	TSS18307	8:27023798-27039433	0.099163656	6.050901018	2.402904118	0.121110232	0.94658857
ENSMUSG00000020432	Tcn2	TSS11353,TSS18694,TSS39104,TSS42294,TSS46635,TSS69855,TSS74223	11:3917191-3932159	0.106447136	6.010537815	2.401430728	0.121224336	0.94658857
ENSMUSG00000068742	Cry2	TSS28214,TSS44943,TSS48880	2:92403645-92434043	0.123692003	4.842457354	2.397933727	0.121495633	0.94658857
ENSMUSG00000034278	Dnajc17	TSS2845,TSS63990,TSS9154	2:119172499-119217049	-0.263563105	2.672229234	2.397216517	0.121551357	0.94658857
ENSMUSG00000061894	Zscan20	TSS28075,TSS40357,TSS4799,TSS63672,TSS8776,TSS9305	4:128583538-128610098	-0.197044149	3.50237331	2.396313821	0.121621533	0.94658857
ENSMUSG00000032199	Polr2m	TSS33744,TSS57680,TSS73764	9:71478436-71592360	-0.091934187	7.754593406	2.396017984	0.121644541	0.94658857
ENSMUSG00000034587	8430429K09Rik	TSS19903,TSS22214,TSS3662,TSS54948	11:3452364-3479831	0.354087748	1.768486345	2.395023523	0.121721919	0.94658857
ENSMUSG00000041642	Kif21b	TSS11558,TSS26660,TSS50878,TSS53138,TSS75510,TSS83037	1:136131388-136177998	0.285770444	2.22575874	2.394291965	0.121778875	0.94658857
ENSMUSG00000041945	Mfsd9	TSS1014,TSS16643,TSS71689	1:40772037-40790687	0.323297813	1.82916013	2.392248297	0.121938145	0.94658857
ENSMUSG00000022040	Ephx2	TSS54484	14:66084376-66124500	0.145899005	6.576013693	2.392100344	0.121949684	0.94658857
ENSMUSG00000030386	Zfp606	TSS12140,TSS31664,TSS73211,TSS84728	7:12478292-12496235	0.134834617	5.683989602	2.391548608	0.121992727	0.94658857
ENSMUSG00000047181	Samd14	TSS15142,TSS473,TSS8481	11:95009878-95026087	0.221156885	2.981515019	2.389269097	0.122170737	0.94658857
ENSMUSG00000021596	Mctp1	TSS13650,TSS14460,TSS26744,TSS30549,TSS54317,TSS72237,TSS79747	13:76384317-77031810	0.462068185	1.867038962	2.38901409	0.122190669	0.94658857
ENSMUSG00000062300	Pvrl2	TSS46462	7:19701312-19749573	0.155765839	5.3053891	2.388620689	0.122221425	0.94658857
ENSMUSG00000025532	Crcp	TSS22452,TSS8571	5:130029289-130060789	0.175962546	3.97050334	2.384826907	0.122518462	0.94658857
ENSMUSG00000097242	CT009757.1	TSS29856	13:63014933-63497278	-0.183718691	4.040661581	2.383980311	0.122584856	0.94658857
ENSMUSG00000037486	Asxl2	TSS15897,TSS4404,TSS47493,TSS47879,TSS77335,TSS80687	12:3365131-3506852	-0.131409371	6.75582499	2.382551188	0.122697026	0.94658857
ENSMUSG00000030867	Plk1	TSS80616	7:122159436-122169875	-0.202017309	4.756180834	2.381398276	0.122787599	0.94658857
ENSMUSG00000093598	A730085K08Rik	TSS3410	9:122351607-122398801	-0.206773848	3.345411663	2.381116148	0.122809774	0.94658857
ENSMUSG00000089417	SCARNA7	TSS50784	3:69067148-69127113	-0.151039916	7.280010917	2.378766118	0.122994659	0.94658857
ENSMUSG00000027858	Tspan2	TSS25639,TSS71185	3:102720230-102772292	0.114868773	6.225316257	2.377994943	0.123055398	0.94658857
ENSMUSG00000000958	Slc7a7	TSS70121	14:54360840-54409472	0.218050201	2.736817999	2.377867777	0.123065417	0.94658857
ENSMUSG00000014550	Zfyve20	TSS27093,TSS51445,TSS51890,TSS60303	6:92186711-92214925	0.132964007	5.563624629	2.376884011	0.123142954	0.94658857
ENSMUSG00000024818	Slc25a45	TSS1021,TSS13598,TSS20374,TSS41775,TSS64124	19:5877807-5885766	0.26762816	2.686486305	2.375770777	0.123230762	0.94658857
ENSMUSG00000048612	Myof	TSS83501	19:37899035-38043577	0.160224485	4.638972554	2.375649177	0.123240357	0.94658857
ENSMUSG00000039396	Neil3	TSS13434,TSS26243,TSS37099,TSS66047,TSS77578,TSS79797	8:53586866-53639065	-0.161581813	5.21046281	2.375471178	0.123254405	0.94658857
ENSMUSG00000045064	Fam164c	TSS22031	12:85288590-85299358	0.216073733	3.005006735	2.375131853	0.123281189	0.94658857
ENSMUSG00000031239	Itm2a	TSS41678	X:107397098-107403376	0.110749435	6.599198221	2.374960465	0.123294719	0.94658857
ENSMUSG00000069910	Ccdc99	TSS1713,TSS75621,TSS8730	11:34809189-34833641	-0.165337195	4.450165333	2.373866337	0.123381137	0.94658857
ENSMUSG00000029338	Antxr2	TSS5276	5:97882782-98030733	-0.095974816	8.041555621	2.373045274	0.123446031	0.94658857
ENSMUSG00000030847	Bag3	TSS5765	7:128523582-128546977	-0.170837941	5.127588127	2.37283537	0.123462628	0.94658857
ENSMUSG00000013663	Pten	TSS27037,TSS30511,TSS5377	19:32757496-32826160	-0.105244252	7.394790703	2.372515618	0.123487914	0.94658857
ENSMUSG00000026245	Farsb	TSS14817,TSS30646	1:78310345-78488859	-0.098842832	6.229302134	2.371640975	0.123557111	0.94658857
ENSMUSG00000025272	Tro	TSS118,TSS14336,TSS15459,TSS20807,TSS28094,TSS4629,TSS69425,TSS80318	X:150645303-150657583	0.160484239	5.89451499	2.371480138	0.12356984	0.94658857
ENSMUSG00000027243	Harbi1	TSS15710,TSS38951,TSS69680,TSS69681,TSS75084	2:91710851-91721545	0.19191549	3.676061028	2.3713001	0.12358409	0.94658857
ENSMUSG00000019792	Trmt11	TSS35004	10:30534224-30600749	-0.172177779	3.637430452	2.369587606	0.123719731	0.94658857
ENSMUSG00000013622	Atraid	TSS16106,TSS16848,TSS27658,TSS41367,TSS48820,TSS53622,TSS70390,TSS8375	5:31036035-31054633	0.12856923	5.277682379	2.368782985	0.123783519	0.94658857
ENSMUSG00000053024	Cntn2	TSS38312	1:132509424-132542940	-0.396261637	2.159263805	2.368295989	0.123822144	0.94658857
ENSMUSG00000028790	Khdrbs1	TSS28432,TSS29633,TSS46374,TSS46375	4:129703163-129742303	-0.096979599	7.113268622	2.368202349	0.123829573	0.94658857
ENSMUSG00000086513	9130208D14Rik	TSS9340	7:105752988-105863650	-0.31791824	1.786812405	2.367964124	0.123848473	0.94658857
ENSMUSG00000079592	C1qtnf5	TSS10055,TSS37378,TSS42081,TSS71073	9:44066326-44121947	0.396475115	1.288343588	2.367622265	0.123875602	0.94658857
ENSMUSG00000056144	Trim34a	TSS20889,TSS28169,TSS28177,TSS30495,TSS55535	7:104244456-104353362	-0.370132219	1.874898082	2.367447107	0.123889504	0.94658857
ENSMUSG00000023905	Tnfrsf12a	TSS34329	17:23675446-23677449	-0.163012432	5.689764552	2.367245109	0.123905539	0.94658857
ENSMUSG00000048582	Gja3	TSS23458	14:57035607-57058030	-0.203922419	3.984121789	2.366796417	0.123941165	0.94658857
ENSMUSG00000021779	Thrb	TSS32010,TSS69773	14:17660959-18038088	0.379590184	1.188191134	2.366659754	0.123952018	0.94658857
ENSMUSG00000035027	Map2k2	TSS46931,TSS56987,TSS63888,TSS64658,TSS72377,TSS73728,TSS83317	10:81105914-81124697	-0.208598446	5.882560192	2.366601682	0.12395663	0.94658857
ENSMUSG00000046756	Mrps7	TSS35641,TSS69674	11:115584254-115612969	-0.099691319	5.932142028	2.366313504	0.123979521	0.94658857
ENSMUSG00000051256	Jagn1	TSS19742	6:113442568-113448229	-0.151414443	4.376362513	2.365308645	0.124059374	0.94658857
ENSMUSG00000050050	Ccdc158	TSS26691,TSS47776,TSS62908,TSS80921	5:92607953-92675271	0.414823397	1.059896553	2.364216224	0.124146251	0.94658857
ENSMUSG00000028334	Nans	TSS13089,TSS61822,TSS77032,TSS85519	4:46489247-46602202	-0.157811015	4.917771844	2.364211803	0.124146603	0.94658857
ENSMUSG00000097912	AC109232.1	TSS58582	7:80294449-80316259	-0.400302214	1.275087423	2.363941453	0.124168114	0.94658857
ENSMUSG00000025231	Sufu	TSS16982,TSS18152,TSS26225,TSS39200,TSS61546,TSS8383	19:46396895-46488804	-0.166611019	3.99911701	2.363376106	0.124213109	0.94658857
ENSMUSG00000028273	Pdlim5	TSS33587,TSS8380	3:142239585-142395696	-0.114567686	9.252308257	2.363129341	0.124232755	0.94658857
ENSMUSG00000067297	2010002M12Rik	TSS5272,TSS79935	19:34617048-34640743	0.296975554	2.4664084	2.359267731	0.124540637	0.94658857
ENSMUSG00000003469	Phyhip	TSS40754,TSS45085	14:70457475-70468832	-0.201784302	3.104734264	2.357726428	0.12466376	0.94658857
ENSMUSG00000028641	Lepre1	TSS21212,TSS29559,TSS33915,TSS39198,TSS4045,TSS42052,TSS43533,TSS51898,TSS52873,TSS56182,TSS7307	4:119232914-119248975	0.134099136	5.44496796	2.356292208	0.124778451	0.94658857
ENSMUSG00000040433	Zbtb38	TSS17454,TSS28857,TSS29036,TSS33875,TSS34008,TSS39597,TSS71277,TSS74330,TSS75308,TSS77114,TSS81022,TSS84826	9:96682762-96752831	0.09512076	6.660257109	2.355456027	0.124845372	0.94658857
ENSMUSG00000025408	Ddit3	TSS5001,TSS67752,TSS75383	10:127289695-127311786	0.185024874	3.705158991	2.354309052	0.124937231	0.94658857
ENSMUSG00000063802	Hspbp1	TSS55055	7:4660520-4684963	-0.27248723	4.357795996	2.353389031	0.125010968	0.94658857
ENSMUSG00000044201	Cdc25c	TSS59940	18:34732996-34751533	-0.172419562	4.011171036	2.352902417	0.125049989	0.94658857
ENSMUSG00000086769	Gm15587	TSS41782,TSS80518	5:24364809-24392143	0.192767293	3.6477763	2.351757993	0.12514181	0.94658857
ENSMUSG00000072812	Ahnak2	TSS13356,TSS20868,TSS22083,TSS62682	12:112772193-112802657	0.216283691	3.324883985	2.351205452	0.12518617	0.94658857
ENSMUSG00000052928	Ctif	TSS18728	18:75431223-75697696	-0.210265964	3.723010216	2.350705314	0.125226337	0.94658857
ENSMUSG00000038594	Gm9766	TSS32350	10:53278080-53379851	-0.14431495	4.544131418	2.350682742	0.125228151	0.94658857
ENSMUSG00000035764	Fbxo45	TSS38076	16:32230111-32247158	-0.144715282	5.536499975	2.348403723	0.125411369	0.94658857
ENSMUSG00000031204	Asb12	TSS59467	X:95470200-95557987	0.291417241	2.290685674	2.347700417	0.125467971	0.94658857
ENSMUSG00000001761	Smo	TSS19449	6:29735693-29761365	0.163715805	5.403950075	2.347277523	0.125502018	0.94658857
ENSMUSG00000039936	Pik3cd	TSS2001,TSS22227,TSS28808,TSS29269,TSS43760,TSS45954,TSS47681,TSS48226,TSS57309,TSS59164,TSS76897,TSS82495,TSS83762	4:149649167-149702571	0.279968992	2.638935184	2.346529619	0.125562258	0.94658857
ENSMUSG00000029781	Fkbp9	TSS40826,TSS54807	6:56832058-56879358	0.097254013	7.94723688	2.344495262	0.125726278	0.94658857
ENSMUSG00000041482	Fam38b	TSS34465,TSS37347,TSS48113,TSS63501,TSS69334	18:63010212-63387183	0.172865768	4.292517436	2.343626774	0.125796373	0.94658857
ENSMUSG00000022125	Cln5	TSS9361	14:103070215-103077579	0.14813933	4.835972377	2.343298606	0.12582287	0.94658857
ENSMUSG00000045639	Zfp629	TSS1894,TSS1897,TSS30323,TSS53041,TSS57590,TSS64574,TSS80472,TSS818,TSS940	7:127607030-127615797	0.117209491	6.59594597	2.343189532	0.125831678	0.94658857
ENSMUSG00000022110	Sucla2	TSS16563,TSS18425,TSS25427,TSS48608,TSS69193,TSS85511,TSS8926	14:73519863-73596142	-0.115579522	8.613439522	2.342809397	0.125862382	0.94658857
ENSMUSG00000031585	Gtf2e2	TSS10300,TSS7146,TSS77277	8:33731913-33777173	0.138893618	5.174300663	2.341951159	0.125931732	0.94658857
ENSMUSG00000036036	Zfp57	TSS16718,TSS21143,TSS27480,TSS32793,TSS3427,TSS35305,TSS39537,TSS40178,TSS49271,TSS70853,TSS72174,TSS80152,TSS85594	17:37001162-37010635	0.187281729	4.000622459	2.341746375	0.125948286	0.94658857
ENSMUSG00000050505	Pcdh20	TSS76015	14:88464746-88471396	0.241489042	2.713605264	2.341418291	0.125974812	0.94658857
ENSMUSG00000031012	Cask	TSS13320,TSS24272,TSS30282,TSS35542,TSS46608,TSS50155,TSS5106,TSS54454,TSS65476,TSS68425,TSS72939	X:13517079-13851367	-0.115871773	5.529535052	2.33964339	0.126118423	0.94658857
ENSMUSG00000030095	Tmem43	TSS37274,TSS48011,TSS49928,TSS59589	6:91473702-91488459	0.113558817	5.149556491	2.339131659	0.126159862	0.94658857
ENSMUSG00000000628	Hk2	TSS26942,TSS32896,TSS38705,TSS59901	6:82725024-82774454	0.13262876	8.129264666	2.338473033	0.126213218	0.94658857
ENSMUSG00000025221	Kcnip2	TSS13818,TSS14089,TSS16052,TSS21114,TSS33714,TSS33715,TSS62478,TSS77012,TSS9019	19:45791838-45816061	0.282863726	6.709372716	2.336241632	0.126394175	0.94658857
ENSMUSG00000015337	Endog	TSS82590	2:30171492-30178459	-0.337767345	1.616279401	2.336105965	0.126405186	0.94658857
ENSMUSG00000027932	Slc27a3	TSS22807,TSS38604,TSS58011,TSS76996,TSS83843	3:90385238-90389938	-0.310717613	1.859868904	2.334899079	0.126503189	0.94658857
ENSMUSG00000041117	Ccdc8	TSS82620	7:16992707-16997516	0.133110252	6.476147868	2.334233253	0.126557292	0.94658857
ENSMUSG00000055148	Klf2	TSS79573	8:72319032-72321656	-0.249127902	3.490052368	2.334164648	0.126562868	0.94658857
ENSMUSG00000020262	Adarb1	TSS16913,TSS26551,TSS30898,TSS40466,TSS4302,TSS43978,TSS48879,TSS58526,TSS8653	10:77290725-77418270	0.109838602	5.825064873	2.334102912	0.126567886	0.94658857
ENSMUSG00000029832	Nfe2l3	TSS47166,TSS61746	6:51432669-51458768	0.213178388	3.288293342	2.331914731	0.12674589	0.94658857
ENSMUSG00000023999	Kif6	TSS15548,TSS24649,TSS38109,TSS64521,TSS80852,TSS82621,TSS8871	17:49615135-49909847	0.351036415	1.985435357	2.331382402	0.126789236	0.94658857
ENSMUSG00000053559	Smagp	TSS12318,TSS61240	15:100621341-100636865	0.246412632	2.908839901	2.33086935	0.126831027	0.94658857
ENSMUSG00000050777	Tmem37	TSS45675	1:120067376-120074074	0.409543403	1.168040517	2.330582919	0.126854366	0.94658857
ENSMUSG00000026767	Fam188a	TSS24833,TSS33406,TSS36533,TSS43640,TSS45893,TSS51094,TSS59111,TSS6101,TSS6105,TSS6107,TSS68978,TSS69987,TSS69994,TSS70667,TSS72957,TSS82564	2:12347262-12419469	-0.138361458	4.73467901	2.330202991	0.12688533	0.94658857
ENSMUSG00000003438	Timm50	TSS1788,TSS2415,TSS27697,TSS47088,TSS62536,TSS67573	7:28305515-28312072	-0.14825489	5.378483627	2.329945715	0.126906303	0.94658857
ENSMUSG00000030536	Iqgap1	TSS68122	7:80711582-80803331	0.098943655	7.748937333	2.328459979	0.127027493	0.94658857
ENSMUSG00000041444	Arhgap32	TSS16002,TSS23017,TSS53865,TSS65524	9:32116135-32268446	-0.118421293	5.804491829	2.325453457	0.127273127	0.94658857
ENSMUSG00000069094	Pde7a	TSS14629,TSS19428,TSS21472,TSS26702,TSS30578,TSS57344,TSS58752,TSS59218,TSS66647,TSS77499	3:19223107-19311322	-0.126908674	5.220549793	2.325067886	0.127304666	0.94658857
ENSMUSG00000032553	Srprb	TSS20747,TSS34922	9:103188032-103230444	-0.124082692	5.654779034	2.323995474	0.127392435	0.94658857
ENSMUSG00000097184	CT030736.1	TSS63078	16:30008666-30021430	-0.388459788	1.110857358	2.322189281	0.12754041	0.94658857
ENSMUSG00000020737	Hn1	TSS33077,TSS34253,TSS39002,TSS48151,TSS83657	11:115497352-115514387	-0.124949698	7.770780792	2.321910287	0.127563284	0.94658857
ENSMUSG00000075470	Alg10b	TSS31409	15:90224310-90230554	-0.116867946	5.924534009	2.320859274	0.127649495	0.94658857
ENSMUSG00000068335	Dok1	TSS24750,TSS5849	6:83030933-83033471	0.259496901	2.264172264	2.320542503	0.127675491	0.94658857
ENSMUSG00000039478	Efha2	TSS40908,TSS69209,TSS84045	8:40279165-40386308	-0.209261462	3.647715647	2.319067576	0.127796611	0.94658857
ENSMUSG00000019659	Ccdc12	TSS26842	9:110656502-110711590	-0.149469327	5.32290667	2.318960498	0.127805409	0.94658857
ENSMUSG00000002820	Atg4d	TSS67232	9:21265298-21287971	-0.15905269	4.950813519	2.317577671	0.127919091	0.94658857
ENSMUSG00000040848	Sft2d2	TSS52803	1:165174340-165194433	0.098174324	6.240359271	2.316593475	0.12800007	0.94658857
ENSMUSG00000001052	Sec24b	TSS1293,TSS13243,TSS15409,TSS22259,TSS25177,TSS47409,TSS53731,TSS74799,TSS84669	3:129982758-130061553	-0.142368479	5.24821405	2.316173125	0.128034673	0.94658857
ENSMUSG00000024777	Ppp2r5b	TSS2297,TSS32,TSS86	19:6226379-6235872	-0.161820069	4.954951096	2.314677553	0.128157874	0.94658857
ENSMUSG00000042320	Prox2	TSS72327,TSS77989	12:85085813-85106431	0.27155708	2.14440451	2.313840292	0.128226903	0.94658857
ENSMUSG00000044350	Lacc1	TSS16645,TSS42892,TSS63175	14:77024199-77112257	0.281777217	2.36425219	2.31316816	0.128282347	0.94658857
ENSMUSG00000025950	Idh1	TSS10085,TSS20095,TSS76343	1:65158615-65186479	-0.096887149	6.147658192	2.31250706	0.128336908	0.94658857
ENSMUSG00000039376	Synpo2l	TSS25742,TSS35388,TSS77876	14:20658945-20668354	-0.106692259	7.916190754	2.311802773	0.128395061	0.94658857
ENSMUSG00000020605	Hs1bp3	TSS25756	12:8313432-8343824	0.160516342	4.17857433	2.311652478	0.128407475	0.94658857
ENSMUSG00000025232	Hexa	TSS36467	9:59539666-59565105	0.121795619	5.690181839	2.31121393	0.128443704	0.94658857
ENSMUSG00000002635	Pdcd2l	TSS19406,TSS75894,TSS83254	7:34184498-34196661	-0.179011046	3.949624848	2.310334005	0.128516432	0.94658857
ENSMUSG00000042709	Atpaf2	TSS22689,TSS22777,TSS22778,TSS2948,TSS4452,TSS45083	11:60400625-60450927	-0.124866006	5.338107424	2.310119777	0.128534145	0.94658857
ENSMUSG00000036678	Aaas	TSS27320	15:102338246-102350759	-0.13329826	4.568048464	2.309811607	0.128559631	0.94658857
ENSMUSG00000038379	Ttk	TSS50960	9:83834688-83872390	-0.157971251	4.795208242	2.309338289	0.128598785	0.94658857
ENSMUSG00000013997	Nit1	TSS10081,TSS12338,TSS20627,TSS41174,TSS45145,TSS79274,TSS79279	1:171329144-171345646	0.115341218	5.807832671	2.309171599	0.128612577	0.94658857
ENSMUSG00000037190	Cyb561d2	TSS66028	9:107539010-107541865	0.247751953	2.418781509	2.308364919	0.128679347	0.94658857
ENSMUSG00000028073	Pear1	TSS24274,TSS25563,TSS26590,TSS33035,TSS36258,TSS36259,TSS40494,TSS42067,TSS4345,TSS4348,TSS51459,TSS53484,TSS9355	3:87617558-87824306	-0.19471731	4.304540014	2.305203514	0.128941391	0.94658857
ENSMUSG00000078670	Fam174b	TSS78403	7:73738892-73776919	-0.109043115	6.49493808	2.304710273	0.128982329	0.94658857
ENSMUSG00000003848	Nob1	TSS11734,TSS23394,TSS39673,TSS4153,TSS44365,TSS50546,TSS6709,TSS75691	8:107412485-107425051	-0.152054461	4.738260395	2.304343603	0.129012771	0.94658857
ENSMUSG00000094649	Gm7102	TSS43703	19:61174685-61176309	-0.254745865	2.140285495	2.304291634	0.129017086	0.94658857
ENSMUSG00000038384	Setd1b	TSS17510,TSS5931,TSS72119,TSS81322	5:123047372-123250131	-0.242168704	2.894088057	2.304167458	0.129027398	0.94658857
ENSMUSG00000041594	Tmtc4	TSS21192,TSS41572,TSS43038,TSS43549,TSS44009,TSS53145,TSS59849,TSS82085,TSS8515	14:122534323-122984035	0.128486543	4.786196893	2.303227052	0.129105519	0.94658857
ENSMUSG00000031812	Map1lc3b	TSS10699,TSS17924,TSS3355,TSS82802,TSS82804	8:119910359-124345724	0.128227835	6.364680809	2.301942173	0.129212342	0.94658857
ENSMUSG00000005087	Cd44	TSS14746,TSS43340,TSS51760,TSS59416,TSS5986,TSS74086,TSS78496,TSS83664	2:102811140-102901665	0.124970935	5.173184682	2.30007907	0.129367413	0.94658857
ENSMUSG00000029016	Clcn6	TSS18469,TSS22465,TSS28124,TSS70531,TSS76688	4:148004258-148038821	-0.136964268	5.158628397	2.298320087	0.129514008	0.94658857
ENSMUSG00000020844	Nxn	TSS46075,TSS46416	11:76257197-76399140	0.151930408	5.069016664	2.297048365	0.129620109	0.94658857
ENSMUSG00000038024	Dennd4c	TSS53046,TSS5315,TSS60702,TSS8069	4:86748554-86850603	0.092218014	6.807690882	2.295462863	0.129752526	0.94658857
ENSMUSG00000075706	Gpx4	TSS25654,TSS34087,TSS35538,TSS35540,TSS37933,TSS58063	10:80047165-80056439	-0.109350039	7.449380736	2.294646388	0.129820774	0.94658857
ENSMUSG00000000827	Tpd52l2	TSS14919,TSS1523,TSS16348,TSS1764,TSS22030,TSS54794,TSS58356,TSS65435,TSS69817,TSS69818,TSS69821,TSS76228	2:181497141-181517966	0.105286645	6.264930857	2.293932767	0.129880457	0.94658857
ENSMUSG00000062580	Timm17a	TSS22579,TSS22669,TSS45397,TSS77722	1:135301531-135313778	-0.101730524	6.745563821	2.293688694	0.129900877	0.94658857
ENSMUSG00000035011	Zbtb7a	TSS18424,TSS2540,TSS34340,TSS5534,TSS66426,TSS79876	10:81135219-81152995	-0.256814036	4.248792919	2.292712437	0.12998259	0.94658857
ENSMUSG00000029910	Mad2l1	TSS23552,TSS37425,TSS42537,TSS58490	6:66535389-66541033	-0.120583191	5.756394335	2.292134653	0.130030978	0.94658857
ENSMUSG00000075266	Cenpw	TSS65548	10:30196010-30200540	-0.220968045	3.039417041	2.291590051	0.130076605	0.94658857
ENSMUSG00000030754	Copb1	TSS48359	7:114215558-114254680	0.097474	7.119409534	2.291564906	0.130078712	0.94658857
ENSMUSG00000031808	Slc27a1	TSS72956	8:71568926-71586708	0.206376227	4.673412663	2.290092822	0.130202136	0.94658857
ENSMUSG00000092558	Med20	TSS15868,TSS37369,TSS38232,TSS6242	17:47611581-47704286	0.111017486	5.370198411	2.289046166	0.13028997	0.94658857
ENSMUSG00000045103	Dmd	TSS11481,TSS22172,TSS25488,TSS45368,TSS48045,TSS50078,TSS53026,TSS53087,TSS55021,TSS55899,TSS62668,TSS64896,TSS76213	X:82948869-85206141	-0.134619842	9.159294071	2.287538236	0.13041663	0.94658857
ENSMUSG00000038077	Kcna6	TSS38695,TSS68738,TSS85238	6:126708328-126741601	0.318981016	2.113376897	2.285611146	0.130578698	0.94658857
ENSMUSG00000000594	Gm2a	TSS25812	11:55098114-55113029	0.152873395	5.581237504	2.285370511	0.130598951	0.94658857
ENSMUSG00000031990	Jam3	TSS12472,TSS23008	9:27097384-27155421	0.131428968	4.911444077	2.284499448	0.130672293	0.94658857
ENSMUSG00000015839	Nfe2l2	TSS41680,TSS44525	2:75675512-75704641	0.106177796	6.357382421	2.283218787	0.130780207	0.94658857
ENSMUSG00000022323	Hrsp12	TSS21796,TSS63266,TSS63719,TSS70359	15:34484020-34495255	-0.27223594	2.474192346	2.282914393	0.130805871	0.94658857
ENSMUSG00000031631	4933411K20Rik	TSS17243,TSS18404,TSS25310,TSS39584,TSS58249,TSS66094	8:46033260-46195590	0.120917935	5.291573833	2.282713082	0.130822847	0.94658857
ENSMUSG00000063694	Cycs	TSS39674,TSS4	6:50562562-50566538	-0.124957244	7.923679079	2.281270361	0.13094458	0.94658857
ENSMUSG00000096941	AC109197.1	TSS77265	1:91932756-92148393	-0.269345552	2.135279995	2.279545673	0.13109027	0.94658857
ENSMUSG00000026563	Tada1	TSS14263,TSS22349,TSS54320,TSS83	1:166379096-166409863	0.134911891	4.969550364	2.27800448	0.131220612	0.94658857
ENSMUSG00000070283	Ndufaf3	TSS26553	9:108565865-108567342	-0.175602073	4.058216323	2.277472124	0.131265669	0.94658857
ENSMUSG00000031399	Fam3a	TSS12692,TSS17540,TSS27595,TSS40401,TSS49961,TSS54104,TSS56993,TSS76919,TSS80025	X:74384718-74393272	0.179746911	4.039468608	2.274997757	0.131475315	0.94658857
ENSMUSG00000018287	Spag7	TSS22848,TSS44509,TSS6110,TSS66900	11:70663770-70669416	-0.113717093	6.055190091	2.274149252	0.131547293	0.94658857
ENSMUSG00000040462	Os9	TSS71568	10:127094258-127121160	0.107619809	5.64735021	2.273209143	0.131627092	0.94658857
ENSMUSG00000015944	Gatsl2	TSS1933,TSS42040	5:134099710-134144343	-0.144081589	4.715436065	2.272310567	0.131703417	0.94658857
ENSMUSG00000022314	Rad21	TSS41968	15:51962604-51991760	-0.100248239	8.135972719	2.271131529	0.131803639	0.94658857
ENSMUSG00000026193	Fn1	TSS12782	1:71585522-71662843	0.163532486	9.231733344	2.270661454	0.13184362	0.94658857
ENSMUSG00000036198	Arhgap36	TSS15948,TSS46600,TSS65912,TSS7874,TSS79352	X:49463944-49500244	-0.4213006	1.233342881	2.269384471	0.131952301	0.94658857
ENSMUSG00000000305	Cdh4	TSS45914,TSS58079,TSS76414,TSS83604,TSS84634	2:179442430-179899373	0.333802267	1.59282154	2.268328485	0.132042248	0.94658857
ENSMUSG00000038374	Rbm8a	TSS26862	3:96629927-96633779	-0.125811876	5.359502614	2.268281773	0.132046229	0.94658857
ENSMUSG00000029321	Slc10a6	TSS55312	5:103605710-103629403	0.378986681	2.152707988	2.267464068	0.132115929	0.94658857
ENSMUSG00000027200	Sema6d	TSS14113,TSS29443,TSS31332,TSS34446,TSS56735,TSS7217,TSS85575	2:124089968-124667770	0.111785123	7.127851657	2.265870144	0.132251911	0.94658857
ENSMUSG00000050043	Tmx2	TSS20548,TSS34808,TSS3643,TSS5347,TSS57863,TSS85996	2:84671315-84715180	-0.136810403	6.011558938	2.26578488	0.13225919	0.94658857
ENSMUSG00000096992	AC127433.1	TSS79682	1:34011824-34308650	-0.207475513	4.078603226	2.265389232	0.13229297	0.94658857
ENSMUSG00000034263	2010321M09Rik	TSS55831,TSS5685	9:64960831-64986974	-0.1120229	5.266172962	2.26435484	0.132381332	0.94658857
ENSMUSG00000026436	Elk4	TSS36249,TSS38708,TSS68456,TSS69442,TSS72767,TSS75305,TSS80376	1:132007606-132068062	0.114749108	5.991571052	2.263809212	0.132427968	0.94658857
ENSMUSG00000034321	Exosc1	TSS75979	19:41922979-41933314	-0.209028889	3.367026038	2.263363178	0.132466105	0.94658857
ENSMUSG00000022529	Zfp263	TSS16479,TSS5032,TSS58446,TSS63468,TSS64899,TSS84981,TSS85152	16:3744092-3750790	0.117939708	5.081882292	2.262697751	0.132523023	0.94658857
ENSMUSG00000042211	Fbxo38	TSS32312	18:62504068-62548743	0.106671853	6.371543414	2.261751532	0.132604007	0.94658857
ENSMUSG00000026575	Nme7	TSS46419	1:164312878-164348181	0.293333149	2.500619067	2.261489936	0.132626406	0.94658857
ENSMUSG00000027955	Fam198b	TSS14890,TSS17950,TSS77140,TSS78438	3:79884532-79946280	-0.106191049	8.250027973	2.260835143	0.132682491	0.94658857
ENSMUSG00000041220	Elovl6	TSS64156	3:129532385-129638495	-0.293893707	4.228973426	2.259699632	0.132779813	0.94658857
ENSMUSG00000004267	Eno2	TSS1516,TSS17043,TSS17050,TSS28456,TSS28617,TSS32380,TSS3824,TSS38426,TSS62501,TSS63016,TSS7165,TSS72158,TSS83345,TSS85791	6:124760052-124769673	0.348095941	1.515196507	2.259426105	0.132803268	0.94658857
ENSMUSG00000071107	4732465J04Rik	TSS67198	10:95792570-95794980	-0.254323622	3.508349974	2.259349273	0.132809857	0.94658857
ENSMUSG00000060336	Zfp937	TSS43625	2:150218072-150240725	0.23404794	2.69886164	2.258286775	0.132901017	0.94658857
ENSMUSG00000050965	Prkca	TSS11369,TSS24601,TSS27204,TSS78932	11:107933386-108414396	-0.096180874	6.298054691	2.258020447	0.132923878	0.94658857
ENSMUSG00000047777	Phf13	TSS50253	4:151989632-151996258	0.167355062	3.708625526	2.257072545	0.13300528	0.94658857
ENSMUSG00000037239	Spred3	TSS32091,TSS38263	7:29158828-29169841	0.297343764	1.910240758	2.256319978	0.133069947	0.94658857
ENSMUSG00000033751	Gadd45gip1	TSS4766	8:84831521-84840665	-0.186274917	4.254698025	2.256255658	0.133075475	0.94658857
ENSMUSG00000022965	Ifngr2	TSS11935,TSS221,TSS8053	16:91547071-91565169	-0.098833236	7.230767073	2.252298408	0.133416111	0.94658857
ENSMUSG00000019278	Dpep1	TSS16802	8:119910359-124345724	0.291446385	4.327546417	2.252018489	0.133440243	0.94658857
ENSMUSG00000024165	Hn1l	TSS1639	17:24942155-24960636	-0.145573132	6.074033028	2.250414876	0.133578585	0.94658857
ENSMUSG00000020456	Ogdh	TSS27748,TSS37458,TSS37459,TSS40786,TSS59750,TSS83190,TSS8589	11:6291632-6356642	-0.104604662	9.754226444	2.250188482	0.133598129	0.94658857
ENSMUSG00000067148	Polr1c	TSS48379,TSS5060,TSS57981,TSS6376,TSS6377	17:46243919-46248054	0.172981484	4.692886431	2.250043914	0.133610611	0.94658857
ENSMUSG00000097854	PPP4R2	TSS62405	10:79910052-79922273	0.25136273	2.76302535	2.246909699	0.133881533	0.94658857
ENSMUSG00000056552	Zfp953	TSS15449,TSS47864,TSS7730	13:67312997-67375810	-0.260575908	2.812688226	2.244355898	0.134102738	0.94658857
ENSMUSG00000044461	Shisa2	TSS74352	14:59625280-59631658	0.419234485	2.542216329	2.243341371	0.134190727	0.94658857
ENSMUSG00000001029	Icam2	TSS38177,TSS42425,TSS42426,TSS50959,TSS55986	11:106377655-106388075	0.1564806	5.37274831	2.24229569	0.134281486	0.94658857
ENSMUSG00000030881	Arfip2	TSS18109,TSS19159,TSS28946,TSS30159,TSS38639,TSS48325,TSS50065,TSS58533,TSS6551,TSS67618,TSS75035	7:105634202-105721799	0.139686251	5.383826293	2.24187324	0.134318172	0.94658857
ENSMUSG00000026880	Stom	TSS61609	2:35313985-35336976	0.110009141	6.467337469	2.24026207	0.13445819	0.94658857
ENSMUSG00000020464	Pnpt1	TSS17626,TSS21430,TSS42635	11:29130743-29161828	-0.112184149	5.948319277	2.23903458	0.134564973	0.94658857
ENSMUSG00000001473	Tubb6	TSS54024	18:67390716-67402748	-0.146763219	6.534766413	2.238822798	0.134583407	0.94658857
ENSMUSG00000025986	Slc39a10	TSS80854,TSS85421	1:46807543-46854046	-0.097738264	5.941673575	2.238653661	0.13459813	0.94658857
ENSMUSG00000029014	Dnajc2	TSS28470,TSS34303,TSS37771,TSS55243,TSS57402,TSS78891,TSS79122	5:21757266-21785251	-0.112406906	5.576621874	2.237280641	0.134717719	0.94658857
ENSMUSG00000051518	Rps19bp1	TSS85552	15:80260613-80264306	-0.189777114	3.298113142	2.23708238	0.134734997	0.94658857
ENSMUSG00000051185	Fam174a	TSS7206	1:95313627-95335284	-0.157889826	3.986642451	2.236762679	0.134762864	0.94658857
ENSMUSG00000039109	F13a1	TSS67455,TSS78308	13:36867177-37050244	0.211795972	4.355877103	2.23541093	0.134880761	0.94658857
ENSMUSG00000077222	SNORA66	TSS18359	5:107900501-107987085	-0.341289079	1.361313085	2.233599569	0.135038925	0.94658857
ENSMUSG00000034573	Ptpn13	TSS31501	5:103425191-103598359	0.11319261	6.091710979	2.231057868	0.135261211	0.94658857
ENSMUSG00000042699	Dhx9	TSS32244	1:153455757-153487660	-0.097728335	7.272906651	2.230931591	0.135272265	0.94658857
ENSMUSG00000087365	C430049B03Rik	TSS37372,TSS40371,TSS75303	X:53055045-53057190	0.107919851	6.106524229	2.230737904	0.135289222	0.94658857
ENSMUSG00000022864	D16Ertd472e	TSS18193	16:78544011-78576657	-0.245217818	2.473468367	2.230591718	0.135302023	0.94658857
ENSMUSG00000031310	Zmym3	TSS13105,TSS14990,TSS15529,TSS21013,TSS34661,TSS35909,TSS35914,TSS46297,TSS48557,TSS49110,TSS57798,TSS63700,TSS69360,TSS6951,TSS7124,TSS75384,TSS76073,TSS77038	X:101404383-101420849	0.106987172	6.278729771	2.22991204	0.135361554	0.94658857
ENSMUSG00000034258	Mfsd7c	TSS66358	12:85746538-85813585	0.1779745	4.418839354	2.229746237	0.13537608	0.94658857
ENSMUSG00000020493	Prr11	TSS55551	11:87089152-87108708	-0.172776554	3.786836832	2.228413245	0.135492932	0.94658857
ENSMUSG00000024902	Mrpl11	TSS61308	19:4962305-4966995	-0.134484293	5.238870421	2.228410326	0.135493188	0.94658857
ENSMUSG00000045763	Basp1	TSS69977	15:25363284-25413764	0.345530085	2.407689885	2.227691623	0.135556238	0.94658857
ENSMUSG00000024811	Tnks2	TSS30444,TSS400,TSS40513,TSS4321,TSS52652,TSS53758,TSS58508,TSS66334,TSS74451	19:36834231-36893477	0.095021636	8.651131075	2.226012215	0.135703695	0.94658857
ENSMUSG00000045201	Lrrc3b	TSS54639,TSS57097	14:15357518-15452423	-0.21492524	3.139003783	2.225946914	0.135709432	0.94658857
ENSMUSG00000030499	Kctd15	TSS21345,TSS31981,TSS52058,TSS68968,TSS71183	7:34639013-34660416	0.326778961	1.749304041	2.225934386	0.135710533	0.94658857
ENSMUSG00000036860	Mrpl55	TSS30234,TSS44707,TSS50307,TSS67354,TSS69572	11:59202485-59206134	-0.147628359	5.034507291	2.225794879	0.135722791	0.94658857
ENSMUSG00000030020	Prickle2	TSS21461,TSS4640,TSS55874,TSS62334	6:92370891-92706145	0.14693602	5.012307563	2.225731528	0.135728358	0.94658857
ENSMUSG00000021041	2700073G19Rik	TSS4198	12:87425839-87472299	0.424082152	0.941426998	2.225708237	0.135730404	0.94658857
ENSMUSG00000097640	RP24-448C16.2	TSS16953,TSS16954,TSS43477,TSS60205,TSS62834	5:64708206-64830129	-0.235915352	3.312817732	2.225131263	0.135781117	0.94658857
ENSMUSG00000049047	Armcx3	TSS15503,TSS31494,TSS57107	X:134756594-134761455	0.090176301	7.164972256	2.22505255	0.135788037	0.94658857
ENSMUSG00000002718	Cse1l	TSS10029,TSS16975,TSS29986,TSS42296,TSS55224,TSS58435,TSS62746,TSS65412,TSS67921,TSS74222,TSS75357,TSS84415	2:166906039-166946389	-0.119235921	7.452116641	2.224961728	0.135796022	0.94658857
ENSMUSG00000070426	Rnf121	TSS17979,TSS27545,TSS37044,TSS53547,TSS73126,TSS76434	7:102019136-102065469	-0.150680479	4.574845964	2.224312867	0.135853086	0.94658857
ENSMUSG00000039620	6430573F11Rik	TSS19062,TSS30208,TSS33573,TSS58492,TSS9952	8:36457547-36514320	-0.248371546	2.523738563	2.223907578	0.135888742	0.94658857
ENSMUSG00000023150	Ivns1abp	TSS68445	1:151344368-151364445	0.187128058	10.17321426	2.223823367	0.135896152	0.94658857
ENSMUSG00000033578	Tmem35	TSS57459	X:134295224-134305969	-0.114609809	5.595900876	2.222411881	0.136020421	0.94658857
ENSMUSG00000021178	Psmc1	TSS48129	12:100110185-100123364	-0.087446907	6.812641848	2.222077667	0.136049864	0.94658857
ENSMUSG00000023030	Slc11a2	TSS31208,TSS37704,TSS38480,TSS56175,TSS6850,TSS7329,TSS80653,TSS85613	15:100387897-100428150	0.124056474	5.22386349	2.221634362	0.136088929	0.94658857
ENSMUSG00000031994	Adamts8	TSS11150,TSS71520	9:30942561-30963838	0.346696393	3.753739222	2.221606947	0.136091345	0.94658857
ENSMUSG00000080058	Gm11175	TSS64627	8:70697738-70700616	-0.541494061	2.179917721	2.221308607	0.136117643	0.94658857
ENSMUSG00000032702	Kank1	TSS22064,TSS33519,TSS42200,TSS42471	19:25236974-25434496	0.108736342	6.882066167	2.220713753	0.136170094	0.94658857
ENSMUSG00000000278	Scpep1	TSS20839	11:88905927-88955465	0.144611152	4.931722891	2.220590065	0.136181003	0.94658857
ENSMUSG00000046994	Mars2	TSS28685	1:55237176-55240058	-0.157796508	4.672068073	2.220406655	0.136197182	0.94658857
ENSMUSG00000036932	Aifm1	TSS26249,TSS47430,TSS5908,TSS65574,TSS79812	X:48474943-48513563	-0.098247695	7.131433156	2.219908363	0.136241146	0.94658857
ENSMUSG00000024955	Esrra	TSS5338,TSS59787,TSS62225,TSS73629,TSS73630	19:6906696-6921813	-0.181827992	6.07059104	2.219793738	0.136251262	0.94658857
ENSMUSG00000079557	Mar-02	TSS12278,TSS13166,TSS32460,TSS38898,TSS5465,TSS57651,TSS59673,TSS84987	17:33646232-33718670	0.122509198	5.654842688	2.219662831	0.136262815	0.94658857
ENSMUSG00000025037	Maoa	TSS45830	X:16619697-16687818	0.132375749	4.420109276	2.219458125	0.136280884	0.94658857
ENSMUSG00000063856	Gpx1	TSS13300	9:108339079-108340338	0.174380615	6.321199551	2.217783665	0.136428787	0.94658857
ENSMUSG00000048701	Ccdc6	TSS21954,TSS68156,TSS74365,TSS9261	10:70097120-70193200	0.09899384	6.020795425	2.217104588	0.13648882	0.94658857
ENSMUSG00000037098	Rab11fip3	TSS3415,TSS34397,TSS34731,TSS40533,TSS62599,TSS841	17:25989035-26069409	-0.15097476	5.099633409	2.217091734	0.136489957	0.94658857
ENSMUSG00000083844	2210015D19Rik	TSS17352,TSS73092,TSS7724,TSS8793	11:5703982-5784710	-0.14096713	4.519947438	2.216169039	0.136571575	0.94658857
ENSMUSG00000036002	B230312A22Rik	TSS24449,TSS2569,TSS35705,TSS48659,TSS4942,TSS52972,TSS57781,TSS78776,TSS82058	4:43027689-43053253	0.132363732	4.48261459	2.215812371	0.136603139	0.94658857
ENSMUSG00000031340	Gabre	TSS58494,TSS75645	X:72255998-72274803	0.330480768	1.511447681	2.215597247	0.136622181	0.94658857
ENSMUSG00000091577	Gm6211	TSS19111,TSS74301	13:102693557-103334497	-0.226493105	3.261641499	2.214425702	0.136725933	0.94658857
ENSMUSG00000021102	Glrx5	TSS19421	12:105032688-105040910	-0.177784316	5.191282235	2.213762434	0.136784711	0.94658857
ENSMUSG00000024056	Ndc80	TSS2644	17:71496099-71526857	-0.146864281	5.343709124	2.212668996	0.136881673	0.94658857
ENSMUSG00000026273	Mterfd2	TSS37191,TSS37828,TSS67166,TSS81637,TSS82170	1:93235840-93305915	0.174965509	4.712226587	2.212002689	0.136940795	0.94658857
ENSMUSG00000018845	Unc45b	TSS66642,TSS67503,TSS7259,TSS9151	11:82910549-82962941	-0.105796181	8.43861783	2.211842927	0.136954976	0.94658857
ENSMUSG00000022562	Oplah	TSS18727,TSS33822,TSS43540,TSS46744,TSS51674,TSS63022,TSS65697,TSS72603,TSS75982	15:76294433-76330677	0.176365388	5.699203163	2.209559059	0.137157869	0.94658857
ENSMUSG00000026156	B3gat2	TSS12054,TSS25603,TSS54388	1:23761752-23922317	-0.219659633	2.559453636	2.207999707	0.137296592	0.94658857
ENSMUSG00000042429	Adora1	TSS3132,TSS31742,TSS70300	1:134193447-134235431	0.123256575	5.164877332	2.206720428	0.137410517	0.94658857
ENSMUSG00000059586	Nsmce2	TSS82876	15:59374197-59601683	-0.125837301	5.22986749	2.20640486	0.137438635	0.94658857
ENSMUSG00000039634	Zfp189	TSS48381,TSS84042	4:49521175-49531517	0.163391389	4.125733464	2.20587845	0.137485556	0.94658857
ENSMUSG00000025188	Hps1	TSS17845,TSS42327,TSS50968,TSS53836,TSS60660,TSS69168,TSS82882,TSS82981,TSS9379	19:42755104-42781454	0.253044342	2.452025057	2.205410509	0.137527279	0.94658857
ENSMUSG00000041439	Mfsd6	TSS23043,TSS23202,TSS39121,TSS75279	1:52656285-52727462	0.133073285	4.455971366	2.20427016	0.137629018	0.94658857
ENSMUSG00000024413	Npc1	TSS17635,TSS2509,TSS36690,TSS61130,TSS65326	18:12168716-12236400	0.137144317	5.902733215	2.204008518	0.137652372	0.94658857
ENSMUSG00000060519	Tor3a	TSS17095,TSS29999,TSS78347,TSS81120	1:156653616-156674356	-0.305194649	3.387359876	2.203015874	0.137741018	0.94658857
ENSMUSG00000019773	Fbxo5	TSS28436,TSS8184	10:5799159-5805600	-0.203688814	4.588670089	2.200321766	0.137981933	0.94658857
ENSMUSG00000031504	Rab20	TSS48514	8:11453391-11480241	-0.138012841	4.569283916	2.19799766	0.13819014	0.94658857
ENSMUSG00000034997	Htr2a	TSS60771	14:74640839-74706859	-0.292921868	1.838136765	2.197311613	0.138251668	0.94658857
ENSMUSG00000015579	Nkx2-5	TSS56198	17:26838663-26841565	-0.308268532	4.799451461	2.195689712	0.138397249	0.94658857
ENSMUSG00000028138	Adh5	TSS15289,TSS33135,TSS63902,TSS82560	3:138443092-138455499	0.089197275	7.158062346	2.194890046	0.13846909	0.94658857
ENSMUSG00000074519	Etohi1	TSS32782,TSS7780	2:178023283-178034022	-0.176108667	3.446764439	2.194159231	0.138534782	0.94658857
ENSMUSG00000056211	R3hdm1	TSS24398	1:128103305-128237735	-0.114127048	5.425268402	2.192814617	0.138655738	0.94658857
ENSMUSG00000083672	Gm9183	TSS45513	17:47611581-47704286	0.246804909	2.996143003	2.189939181	0.138914801	0.94658857
ENSMUSG00000097893	AC158928.1	TSS12242,TSS82280	1:9718621-9791922	-0.236796601	2.481213853	2.189723842	0.138934223	0.94658857
ENSMUSG00000035566	Pcdh17	TSS80386	14:84443562-84537060	-0.157389205	4.925200636	2.186522239	0.139223356	0.94658857
ENSMUSG00000021242	Npc2	TSS69366	12:84754559-84773112	0.0999042	6.562123296	2.186367665	0.139237332	0.94658857
ENSMUSG00000028656	Cap1	TSS23622,TSS43645,TSS4836,TSS51078,TSS54821,TSS75912,TSS82678	4:122836241-122886056	0.094453205	6.75632562	2.186363735	0.139237688	0.94658857
ENSMUSG00000037890	Wdr19	TSS10543	5:65199695-65260415	0.198734219	3.682980212	2.185967161	0.139273553	0.94658857
ENSMUSG00000027848	Olfml3	TSS39024,TSS82077	3:103722221-103738001	0.136877819	4.561890299	2.185289577	0.139334856	0.94658857
ENSMUSG00000036644	Tbc1d9b	TSS39831,TSS45915,TSS68028,TSS70636,TSS71201,TSS76743,TSS85417	11:50131395-50172785	0.09453474	6.480770696	2.184046807	0.139447372	0.94658857
ENSMUSG00000066151	Fkbp15	TSS28870,TSS30532,TSS47189,TSS74919,TSS79069,TSS85520	4:62300341-62360548	0.101523462	5.492075875	2.183107132	0.139532514	0.94658857
ENSMUSG00000061436	Hipk2	TSS2710,TSS2973,TSS34806,TSS39125,TSS47275,TSS58382,TSS70575	6:38694389-39084585	-0.148092916	5.528716453	2.181275604	0.139698633	0.94658857
ENSMUSG00000011884	Gltp	TSS1083,TSS45679,TSS48781	5:114669402-114690984	-0.195680712	3.116240483	2.180867601	0.13973567	0.94658857
ENSMUSG00000021638	Ocln	TSS18190,TSS33879,TSS50192,TSS66353,TSS83873	13:100496506-100552718	0.384140088	1.521977239	2.17759272	0.140033343	0.94658857
ENSMUSG00000048728	Zfp454	TSS34229,TSS52340,TSS65906,TSS74926	11:50872719-50887651	0.326435195	1.532192399	2.177454635	0.14004591	0.94658857
ENSMUSG00000063087	Gm10125	TSS24414,TSS28078,TSS45489,TSS68307,TSS76624,TSS78592	18:5491502-5775467	-0.292093011	1.679354518	2.176866109	0.140099486	0.94658857
ENSMUSG00000037664	Cdkn1c	TSS54114	7:143458349-143461050	0.188285821	5.896692885	2.176656519	0.140118571	0.94658857
ENSMUSG00000050668	Ccdc75	TSS81780	17:78835515-78848299	-0.150804467	4.302063589	2.175408699	0.140232258	0.94658857
ENSMUSG00000022575	Gsdmd	TSS14311	15:75862338-75867404	0.260684293	2.752339182	2.175076182	0.14026257	0.94658857
ENSMUSG00000024011	Pi16	TSS17075,TSS43381,TSS51545,TSS74467	17:29318876-29329413	0.324740386	2.405755608	2.174473356	0.140317543	0.94658857
ENSMUSG00000030447	Cyfip1	TSS14653,TSS18094,TSS24345,TSS24927,TSS35527,TSS50528,TSS65008,TSS81782,TSS82771,TSS82773	7:55841744-55930700	0.090083366	6.913775384	2.174224875	0.14034021	0.94658857
ENSMUSG00000041577	Prelp	TSS17825,TSS68237	1:133897198-133921414	-0.35795238	3.316477413	2.173259479	0.140428312	0.94658857
ENSMUSG00000049723	Mmp12	TSS39325,TSS64894,TSS70965,TSS80118	9:7344380-7388047	-0.231416308	3.824049354	2.172830399	0.14046749	0.94658857
ENSMUSG00000005687	Bcas2	TSS22573,TSS43868,TSS5329,TSS56988,TSS60729,TSS67313	3:103171654-103179166	0.104552326	5.683644917	2.1720898	0.140535141	0.94658857
ENSMUSG00000030872	Gga2	TSS12313,TSS18763,TSS30451,TSS36934,TSS57293,TSS60614	7:121986721-122021222	0.094984151	7.14870334	2.171286596	0.140608552	0.94658857
ENSMUSG00000027166	Dnajc24	TSS18231,TSS50097,TSS59175,TSS68948,TSS80781	2:105966708-106406151	-0.207875327	2.957800859	2.170547652	0.140676128	0.94658857
ENSMUSG00000028884	Rpa2	TSS23698,TSS3200,TSS37280,TSS68327,TSS68328,TSS83916	4:132768331-132778752	-0.139967336	5.244643262	2.170233622	0.140704857	0.94658857
ENSMUSG00000057396	Zfp759	TSS41235	13:67128227-67141787	0.185947647	3.17627233	2.166736998	0.141025189	0.94658857
ENSMUSG00000041828	Abca8a	TSS11616,TSS34545,TSS37300,TSS58964,TSS71287,TSS7261	11:110025633-110095978	-0.162094332	5.695854107	2.166344569	0.141061191	0.94658857
ENSMUSG00000064368	mt-Nd6	TSS49677	MT:11741-14070	-0.143685164	7.780431212	2.164856181	0.141197833	0.94658857
ENSMUSG00000052133	Sema5b	TSS16276,TSS27689,TSS32900,TSS42502,TSS55370,TSS55611,TSS68223,TSS69303	16:35541144-35664732	0.364364568	1.263427524	2.164070802	0.141269994	0.94658857
ENSMUSG00000026189	Pecr	TSS40241,TSS55521,TSS6708	1:72236464-72284314	0.251556838	2.959479265	2.163973235	0.141278962	0.94658857
ENSMUSG00000022816	Fstl1	TSS16215,TSS20124,TSS22818,TSS615,TSS83857,TSS83961	16:37776872-37836514	0.089787946	9.735448487	2.163142207	0.141355369	0.94658857
ENSMUSG00000038446	Cdc40	TSS61475	10:40831625-40883143	-0.138196225	5.086257085	2.162721541	0.141394063	0.94658857
ENSMUSG00000069266	Hist1h4b	TSS22133	13:23756202-23757620	-0.449889958	2.739166828	2.161712737	0.141486906	0.94658857
ENSMUSG00000071072	Ptges3	TSS17523,TSS80140,TSS8177	10:128058953-128077272	-0.11701326	6.456175658	2.160368643	0.141610713	0.94658857
ENSMUSG00000020859	Spag9	TSS12767,TSS2304,TSS37705,TSS4918,TSS56681,TSS5673,TSS60598,TSS62895,TSS71634,TSS82139	11:93996090-94126085	0.107099622	8.42403728	2.160185391	0.141627602	0.94658857
ENSMUSG00000052139	Bre	TSS13725,TSS27461,TSS33048,TSS45443,TSS47336,TSS48847,TSS5258,TSS53524,TSS5674,TSS72149,TSS72150,TSS81702	5:31596934-32084962	0.136042264	4.998347377	2.158882034	0.141747789	0.94658857
ENSMUSG00000026207	Speg	TSS20041,TSS29805,TSS37071,TSS38850,TSS5122,TSS51685,TSS53854,TSS56068,TSS6219,TSS71007,TSS71956,TSS81634,TSS85364	1:75375296-75432320	-0.131699669	7.118593706	2.158864014	0.141749451	0.94658857
ENSMUSG00000052566	Hook2	TSS32552	8:84990594-85003364	0.315632861	2.043718585	2.158608853	0.141772994	0.94658857
ENSMUSG00000016018	Skiv2l2	TSS1443	13:112800893-112927380	-0.114297841	6.542734031	2.15648174	0.141969428	0.94658857
ENSMUSG00000024410	3110002H16Rik	TSS17107,TSS18427,TSS31567,TSS39162,TSS5971,TSS60079,TSS66361,TSS85880	18:12168716-12236400	0.113427902	5.387529054	2.156278484	0.141988214	0.94658857
ENSMUSG00000008822	Acyp1	TSS30669,TSS39117,TSS52998,TSS62323	12:85272397-85288438	0.158083865	3.683115494	2.156227707	0.141992907	0.94658857
ENSMUSG00000026313	Hdac4	TSS18842	1:91932756-92148393	-0.145270837	4.213724822	2.155752936	0.142036801	0.94658857
ENSMUSG00000079659	4930420K17Rik	TSS35203	5:9100736-9161749	-0.367207537	1.022806272	2.155390466	0.142070323	0.94658857
ENSMUSG00000052305	Hbb-b1	TSS114,TSS67012,TSS79487	7:103826533-103828096	0.560481631	9.957491875	2.155205916	0.142087394	0.94658857
ENSMUSG00000038046	Rnmtl1	TSS17211,TSS51322,TSS68294	11:76046225-76250619	-0.171626225	4.19823588	2.154600493	0.142143411	0.94658857
ENSMUSG00000066839	Ecsit	TSS31617,TSS36798,TSS9281	9:22055459-22086122	-0.116522438	6.033697649	2.153887251	0.142209436	0.94658857
ENSMUSG00000025870	Arl10	TSS40085,TSS4041,TSS52677,TSS86002	13:54575014-54581128	0.227801579	2.777953063	2.153832749	0.142214483	0.94658857
ENSMUSG00000027820	Mme	TSS72057	3:63295871-63382231	0.284645855	2.097322014	2.152737023	0.142315987	0.94658857
ENSMUSG00000064032	Gm10143	TSS36509,TSS54783	19:10198367-10207824	-0.165210567	5.077867345	2.152279838	0.142358363	0.94658857
ENSMUSG00000020277	Pfkl	TSS15525,TSS55672,TSS76899,TSS79880	10:77986946-78010083	0.167028822	8.467339109	2.15046174	0.14252702	0.94658857
ENSMUSG00000036564	Ndrg4	TSS25846,TSS30126,TSS30666,TSS30890,TSS39381,TSS4520,TSS67159,TSS71319,TSS73977,TSS74769	8:95676979-95715119	-0.091727261	9.14842686	2.149975019	0.142572209	0.94658857
ENSMUSG00000068614	Actc1	TSS57276,TSS65520	2:114009600-114068324	-0.122243451	13.50495118	2.149876815	0.142581329	0.94658857
ENSMUSG00000037643	Prkci	TSS19170,TSS34175,TSS69830,TSS80924,TSS83949	3:30995746-31052741	0.109723422	5.839062501	2.149090409	0.142654382	0.94658857
ENSMUSG00000030223	Ptpro	TSS20712,TSS76971	6:137252298-137464629	0.298323751	1.842717556	2.149043937	0.1426587	0.94658857
ENSMUSG00000064348	mt-Tn	TSS71236	MT:5088-5159	0.189658039	5.573284231	2.148958404	0.142666648	0.94658857
ENSMUSG00000064061	Dzip3	TSS14100,TSS30503,TSS57801,TSS61262,TSS75520,TSS78538,TSS84505	16:48924231-48994165	-0.117204924	5.810232126	2.148459113	0.142713056	0.94658857
ENSMUSG00000066415	Msl2	TSS29598	9:101074726-101104784	-0.106875658	5.842351442	2.148295653	0.142728252	0.94658857
ENSMUSG00000028102	Pex11b	TSS20313,TSS40045,TSS42003,TSS43414,TSS44585,TSS47356,TSS5669,TSS70098,TSS84157	3:96635375-96664519	0.133791645	4.408494183	2.145872791	0.142953718	0.94658857
ENSMUSG00000066278	Vps37b	TSS60951	5:124004640-124032260	-0.154041151	4.888756494	2.144777798	0.143055747	0.94658857
ENSMUSG00000029683	Lmod2	TSS9032	6:24597770-24605414	-0.162080041	6.806080302	2.144771497	0.143056335	0.94658857
ENSMUSG00000002731	Prkra	TSS5832,TSS76079	2:76629897-76648015	0.13611067	4.570923021	2.144599478	0.143072371	0.94658857
ENSMUSG00000028121	Bcar3	TSS42944	3:122419779-122530180	0.20481009	2.892139436	2.142425205	0.143275234	0.94658857
ENSMUSG00000040675	Mthfd1l	TSS34968,TSS37830,TSS44561,TSS75526	10:3973117-4167081	0.241723708	4.525314275	2.141627569	0.143349736	0.94658857
ENSMUSG00000079523	Tmsb10	TSS21370,TSS46164,TSS75638,TSS81083	6:72957346-72958748	0.196746965	5.98064522	2.141250303	0.143384989	0.94658857
ENSMUSG00000027022	Xirp2	TSS81845	2:67446001-67526614	-0.313011015	5.057792527	2.139121387	0.143584105	0.94658857
ENSMUSG00000042225	Ammecr1	TSS20017	X:142851145-142966728	-0.105409797	6.887288	2.139093678	0.143586699	0.94658857
ENSMUSG00000021196	Pfkp	TSS1496,TSS31320,TSS35720,TSS36463,TSS39061,TSS58486,TSS59150,TSS71821,TSS77977,TSS8944	13:6548156-6648777	0.108960809	8.96962373	2.138805836	0.143613645	0.94658857
ENSMUSG00000087385	AA415398	TSS52667,TSS70052,TSS82875,TSS9417	4:119530307-119629119	-0.315223624	1.714503008	2.138584688	0.143634352	0.94658857
ENSMUSG00000042579	4632404H12Rik	TSS80205	3:89767510-89773240	0.225828093	3.070881517	2.138099529	0.14367979	0.94658857
ENSMUSG00000003660	Snrnp200	TSS26567,TSS27474,TSS69521,TSS77085,TSS80782	2:127208385-127240451	0.085159504	8.067953796	2.137229222	0.14376134	0.94658857
ENSMUSG00000051278	4930422G04Rik	TSS55847	3:127553488-127618021	-0.157545579	5.239759328	2.135618682	0.14391239	0.94658857
ENSMUSG00000025980	Hspd1	TSS50915,TSS62104	1:55077834-55091307	-0.101735331	8.648510529	2.134664005	0.144002011	0.94658857
ENSMUSG00000085963	Gm15249	TSS13794	X:4184032-4186911	-0.322114874	2.038274635	2.134423095	0.144024637	0.94658857
[truncated: 11,197 more rows]
