# Supplementary material for: Maternal diet-induced obesity during pregnancy alters lipid supply to mouse E18.5 fetuses and changes the cardiac tissue lipidome in a sex-dependent manner
Source: eLife. 2022 Jan 13;11:e69078. doi: 10.7554/eLife.69078 (PMC8794468; doi:10.7554/eLife.69078)
Supplement: Figure 5—source data 3. [file elife-69078-fig5-data3.csv]

Figure 5-Source Data 3
Figure 5C
List of IPA upstream regulators with mapped E18.5 fetal cardiac genes confidently regulated by maternal obesity.
Upstream Regulator	Expr Log Ratio	Molecule Type	Predicted Activation State	Activation z-score	Notes	Bias Term	Bias-corrected z-score	p-value of overlap	Target molecules in dataset
elaidic acid		chemical - endogenous mammalian	Inhibited	-3.036		0.135	-3.571	7.48E-15	ACACA,CYP51A1,DGAT2,DHCR24,FABP5,FADS1,FASN,FDPS,HMGCS1,HSD17B12,IDI1,LDLR,MVK,NSDHL,PCYT2,SCD
SCAP	-0.068	other	Inhibited	-3.512		0.139	-4.001	2.97E-14	ACACA,CYP51A1,FABP5,FADS2,FASN,FDPS,HMGCS1,IDI1,INSIG1,LDLR,Mt2,MVK,NSDHL,SCD,Scd2
POR	0.02	enzyme	Activated	2.897		-0.053	3.08	2.39E-13	Acot1,BDH1,CPT1A,CPT2,CYP51A1,DHCR24,FADS2,FDPS,HMGCS1,HSD17B12,IDI1,INSIG1,LDLR,MVK,NSDHL,SCD,Scd2,SDC4,TUBB2B
SREBF2	-0.088	transcription regulator	Inhibited	-2.826		0.108	-3.22	2.44E-13	ACACA,CAMK1D,CYP51A1,FABP5,FADS2,FASN,FDPS,HMGCS1,IDI1,INSIG1,LDLR,MVK,NSDHL,SCD
PPARA	-0.078	ligand-dependent nuclear receptor	Activated	2.09		0.04	1.907	5.11E-13	ACACA,Acot1,ACOT2,ALDH9A1,ANGPTL4,ANXA2,CPT1A,CPT2,CYP51A1,ECH1,FABP5,FADS1,FADS2,FASN,FDPS,FGB,FGG,H1-2,HMGCS1,IDI1,IGFBP5,INSIG1,MVK,NSDHL,PLIN5,SCD,SELENBP1,SLC25A20
INSIG1	-0.544	other	Activated	3.358		-0.138	3.877	6.77E-13	ACACA,CYP51A1,DHCR24,FABP5,FADS1,FADS2,FASN,FDPS,HMGCS1,IDI1,LDLR,MVK,PCYT2,SCD,Scd2
MFSD2A		transporter	Activated	3		-0.131	3.393	1.12E-12	CYP51A1,FADS1,FADS2,FASN,IDI1,INSIG1,LDLR,SCD,Scd2
methylprednisolone		chemical drug		0.946		0.028	0.808	1.70E-11	AGO1,ANXA2,ANXA3,BDH1,C1QBP,CAMK1D,CCN2,CTSV,DDIT4,ECE1,EDNRB,FABP5,HSD17B12,IGF2R,INSIG1,JUN,LDLR,MMP11,MVK,NSDHL,PCYT2,PLAT,PSAT1,SDC4,SLC16A6,TFRC,TIMP3,YBX3
lysophosphatidylcholine		chemical - other	Inhibited	-2.891		0.108	-3.263	2.32E-11	CYP51A1,FABP5,FADS2,FASN,HMGCS1,INSIG1,JUN,LDLR,MVK,NSDHL,SCD,TNFRSF9
FOXO4	0.1	transcription regulator		-1.103		0.003	-1.113	2.64E-11	ACACA,ANXA3,BNIP3,CCN2,CYP51A1,DHCR24,EDNRB,FABP5,FASN,FLNB,HMGCS1,IDI1,SCD,Scd2
TGFB1	-0.015	growth factor		1.037		0.046	0.748	2.06E-10	Acot1,ADM,ANGPTL4,ANXA2,BDH1,BNIP3L,CCN1,CCN2,CDT1,CLU,CORIN,DDIT4,DKK3,ECE1,EDNRB,FABP5,FASN,FGB,FGF12,FGG,FLNB,FXYD6,GAS1,HEY1,IDI1,IGFBP5,IL33,ITGA6,JUN,LDLR,LOXL2,MAF,MAPK3,MMP11,NFATC2,PECAM1,PLAT,PMEPA1,PROM1,PSAT1,PXN,SCD,SDC4,SELENBP1,SLN,SNTB2,SPC25,STAT5B,TENM4,TFRC,TIMP3,TUBB2A,VWF
FOXO1	0.031	transcription regulator		-0.5		0.07	-0.781	5.50E-10	ACACA,ANGPTL4,ANXA3,BNIP3,CASP6,CCN2,CPT2,CTSV,DDIT4,DNAJC19,EDNRB,FABP5,FASN,FDPS,FGF18,FLNB,JUN,MRPS22,RIPOR2,SCD,SLC25A20,SPC25,STAT5B,TNFRSF9
ATP7B	0.184	transporter		-1.667		0.011	-1.7	6.56E-10	CYP51A1,FABP5,FASN,FDPS,H1-2,HMGCS1,IDI1,LDLR,Mt2
l-asparaginase		biologic drug	Activated	3.051		-0.111	3.453	6.90E-10	CENPL,CYP51A1,FASN,FDPS,HMGCS1,IDI1,INSIG1,KIF20B,LDLR,NSDHL,PSAT1,SPC25,UBE2C
TP53	-0.03	transcription regulator	Activated	2.115		0.018	2.009	1.01E-09	AKAP12,ALDH9A1,ANXA2,ANXA3,BNIP3,CASP6,CCN1,CCN2,CDT1,CLU,Cox5b,CPT1A,CPT2,CTSF,CYP51A1,DDIT4,DHCR24,DKK3,ECH1,FABP5,FASN,FDPS,FGF13,GAS1,GPM6A,HDC,HMGCS1,IGFBP5,JUN,LDLR,MAPK3,MRPL12,Mt2,MVK,NDRG1,NDUFS6,PECAM1,PMEPA1,PPFIBP1,PPM1F,PROM1,RAD23A,RANGAP1,SCD,SGTB,SHC1,SPC25,TCAP,TFRC,TIMP3,TNFRSF9,UBE2C,VEGFB
EPAS1	0.097	transcription regulator		1.406		0.112	1.011	1.23E-09	ACACA,ADM,AKAP12,ANGPTL4,BNIP3,CCN1,CCN2,CYP51A1,DGAT2,FASN,H1-2,HMGCS1,IGFBP5,LDLR,LOXL2,NDRG1,SLC16A4
metribolone		chemical reagent		-0.171		0.109	-0.687	1.41E-09	ACACA,AKAP12,ALDH9A1,CLU,CPT2,DHCR24,ECH1,FASN,FDPS,GRIP1,HMGCS1,IDI1,IGFBP5,ITGA6,KMT5A,LDLR,MAF,MRPS22,NDRG1,NDUFS8,NSDHL,PMEPA1,RAD23A
pirinixic acid		chemical toxicant		1.417		0.09	1.035	1.60E-09	ACACA,Acot1,ACOT2,ALDH9A1,ANGPTL4,ANXA2,BNIP3,CLU,CPT1A,CPT2,ECH1,FABP5,FADS1,FADS2,FASN,FGB,H1-2,HMGCS1,INSIG1,LDLR,PLIN5,SCD,SLC25A20
cholesterol		chemical - endogenous mammalian		1.934		0.048	1.748	1.71E-09	ACACA,Acot1,CAMK1D,CPT1A,FABP5,FADS1,FASN,FDPS,HMGCS1,IDI1,INSIG1,LDLR,NSDHL,PCYT2,PSAT1,SCD,TIMP3
dexamethasone		chemical drug		-0.23		0.019	-0.36	2.20E-09	ACACA,ADM,AKAP12,ANGPTL4,ANXA3,BNIP3,CASP6,CCN1,CCN2,CLU,COL4A5,Cox5b,CRH,CTNNAL1,CTSV,CYP51A1,DDIT4,DGAT2,DHCR24,DUSP10,ECT2,EDNRB,EPB41,FABP5,FASN,FGB,FGG,FLNB,GAS1,HEY1,IGFBP5,IL33,IRF2BP2,ITPR3,JUN,KLF3,LDLR,LY75,MAF,MAPK3,MSLN,Mt2,MVK,NAGA,NAT8B,NTS,PEX11G,PLAT,SCD,Scd2,SELENBP1,SHC1,SLC25A34,TFRC,TIMP3,TNFRSF9,UBE2C
beta-estradiol		chemical - endogenous mammalian	Inhibited	-2.123		0.041	-2.404	2.82E-09	Acot1,ADM,AKAP12,ANXA3,BNIP3L,C1QBP,CCN1,CCN2,CDT1,CLU,COL4A5,CPT1A,CYP51A1,DDIT4,DHCR24,DUSP10,ECH1,FABP5,FADS1,FASN,FGB,FLNB,GRIP1,HEY1,HMGCS1,HSD17B12,HSPA2,IGF2R,IGFBP5,INSIG1,JUN,LDLR,LMCD1,MAF,MAPK3,MGARP,MVK,NDRG1,NSDHL,NTS,Pcp4l1,PLAT,PRKCH,PROM1,PSAT1,PXDN,PXN,RYR3,SDC4,SELENBP1,SHC1,SPRED2,TIMP3,UBE2C,VAMP1,VWF
Ins1		other		-1.413		0.056	-1.641	3.05E-09	ACACA,Acot1,ANGPTL4,BDH1,DGAT2,FADS1,FADS2,FASN,HMGCS1,IGFBP5,ITGA6,JUN,LDLR,MAPK3,Marcks,PLAT,SCD,Scd2,TIMP3
nitric oxide		chemical - endogenous mammalian		1.226		0.053	1.07	4.01E-09	BNIP3,CCN2,CRH,ECE1,HEY1,JUN,Mt2,NDRG1,NID1,PECAM1,SLC16A4,TFRC,TIMP3,UBE2C
HRAS	-0.143	enzyme		-1.405		0.043	-1.559	4.15E-09	ACACA,ADM,ANXA2,ANXA3,BNIP3,CCN1,CCN2,CLU,CPT1A,CTSV,FASN,HDC,HEY1,IGFBP5,ITGA6,JUN,KLF3,LBH,MAPK3,MRPL12,NID1,PMEPA1,PXN,SCD,Scd2,SLN,TENM4,TIMP3
Tgf beta		group		0.234		0.062	-0.013	7.40E-09	ANGPTL4,CCN1,CCN2,CLU,FGG,HEY1,IGFBP5,ITGA6,JUN,LMCD1,MAF,MMP11,PLAT,PMEPA1,PROM1,RYR3,TFRC,TIMP3
ADRB		group	Activated	2.496		-0.047	2.667	8.42E-09	ANGPTL4,BNIP3,BNIP3L,CASP6,CYP51A1,DDIT4,FDPS,HMGCS1,INSIG1,JUN,LBH,NSDHL,PCYT2
Am 580		chemical toxicant	Activated	2.328		0.021	2.266	8.76E-09	ADM,CPT1A,CYP51A1,FASN,HMGCS1,ITGA6,MVK,PLAT,SCD
(-)-norephedrine		chemical drug	Inhibited	-2.449		0.144	-2.802	8.93E-09	CYP51A1,FDPS,HMGCS1,IDI1,LDLR,MVK
INSIG2	0.052	other	Activated	2.391		-0.144	2.735	8.93E-09	ACACA,FASN,FDPS,INSIG1,LDLR,SCD
TRIB1	0.166	kinase	Activated	2.216		-0.036	2.295	9.57E-09	ACACA,CPT1A,CPT2,FASN,SCD
fenofibrate		chemical drug		1.456		0.041	1.295	1.10E-08	Acot1,ACOT2,ANGPTL4,CLU,CPT1A,CPT2,DGAT2,ECH1,FADS2,FASN,FGB,FGG,JUN,LDLR,SCD,SLC25A20,VEGFB
PPARG	0.023	ligand-dependent nuclear receptor		-0.551		0.042	-0.73	1.15E-08	ACACA,ALDH9A1,ANGPTL4,BDH1,CCN2,CORIN,CPT1A,CPT2,DGAT2,FABP5,FASN,FDPS,IGFBP5,IL33,INSIG1,JUN,LDLR,NDRG1,PECAM1,PLIN5,SCD,SLC25A20,STAT5B
deferoxamine		chemical drug		0.907		0.073	0.633	1.20E-08	ADM,ANGPTL4,ANXA2,BNIP3,DUSP10,FASN,FGF18,IGFBP5,JUN,LY75,NDRG1,NFATC2,PLAT,PROM1,TFRC
F2		peptidase		1.008		0.13	0.49	1.22E-08	ANGPTL4,CCN1,CCN2,CLU,DKK3,ECE1,EDNRB,EPB41,IGFBP5,JUN,LBH,LMCD1,LOXL2,MAPK3,PLAT,SDC4,VWF
FOXO3	0.122	transcription regulator		1.324		0.03	1.21	1.30E-08	Acot1,ANXA3,BNIP3,BNIP3L,CCN1,CCN2,CDT1,CPT1A,CTSV,DDIT4,EDNRB,FABP5,FASN,FLNB,Mt2,NDRG1,PECAM1,TAL1,UBE2C
TO-901317		chemical reagent		-1.836		0.043	-1.986	1.39E-08	ACACA,Acot1,ADM,CPT1A,FABP5,FADS1,FADS2,FASN,FDPS,HSD17B12,ITGA6,LDLR,Mt2,SCD,Scd2,TIMP3
SH3TC2	0.075	other	Inhibited	-2.646		0.124	-2.974	2.70E-08	CYP51A1,DHCR24,FDPS,HMGCS1,IDI1,MVK,NSDHL
SREBF1	-0.248	transcription regulator	Inhibited	-2.688		0.102	-3.085	3.29E-08	ACACA,CAMK1D,CYP51A1,FABP5,FADS1,FADS2,FASN,FDPS,HMGCS1,IDI1,INSIG1,LDLR,NSDHL,SCD,Scd2,TNNI2
AGN194204		chemical drug		0.781		0.086	0.525	4.73E-08	Acot1,ANGPTL4,ANXA2,BNIP3L,CPT1A,CYP51A1,EPB41,FDPS,H1-2,IDI1,IL33,NSDHL,SCD,Scd2,STAT5B
KLF15	0.022	transcription regulator		1.689		0.074	1.488	6.00E-08	Acot1,CCN2,CPT2,DGAT2,FABP5,FASN,SCD,SLC25A20
ezetimibe		chemical drug	Inhibited	-2.431		0.083	-2.633	1.25E-07	CYP51A1,FDPS,HMGCS1,IDI1,LDLR,MVK
INSR	0.08	kinase		-1.363		0.114	-1.769	1.67E-07	ACOT2,CASP6,CCN2,Cox5b,CPT2,CTSV,CYP51A1,FASN,FDPS,GAS1,HMGCS1,IDI1,IGF2R,MMP11,MVK,NDRG1,NSDHL,SCD,SLC25A20
PPARGC1A	0.024	transcription regulator		0.505		0.033	0.37	1.68E-07	ACACA,BDH1,BNIP3,CCN2,Cox5b,CPT1A,FASN,FDPS,IGFBP5,INSIG1,LDLR,NDUFS8,NSDHL,PLIN5,SCD,Sik1,SLC25A20,TIMP3
thioacetamide		chemical toxicant		1.501		0.123	1.231	2.07E-07	ACOT2,AKAP12,ANXA2,CCN2,CLU,CTSF,CYGB,DKK3,EDNRB,FGB,FXYD6,JUN,PECAM1,PROM1,Scd2
MBTPS1	0.009	peptidase	Inhibited	-2.236		0.122	-2.509	2.10E-07	ACACA,FASN,FDPS,LDLR,SCD
HTT	-0.07	transcription regulator	Activated	2.236		0.03	2.17	2.68E-07	ACOT2,AKAP12,CCN2,CYP51A1,DKK3,EDNRB,FASN,FDPS,FXYD6,HMGCS1,IGFBP5,JUN,LDLR,Marcks,NDUFA11,NFIC,NTS,PROM1,SCAMP5,Scd2,SGTB,Sik1,TFRC,TIMP3,TNNI2,VAMP1
arachidonic acid		chemical - endogenous mammalian		0.468		0.031	0.373	3.15E-07	ACACA,CLU,FADS1,FADS2,FASN,JUN,LDLR,PECAM1,SCD,TNFRSF9
chloropromazine		chemical drug						4.12E-07	FADS2,FDPS,HMGCS1,IDI1,LDLR,MVK,SCD
isoquercitrin		chemical drug	Inhibited	-2.236		0.125	-2.515	4.81E-07	CYP51A1,FASN,FDPS,INSIG1,LDLR
GLP-1 (7-36) amide		biologic drug		1.982		-0.062	2.105	5.39E-07	ACACA,FASN,ITPR3,SCD
raloxifene		chemical drug		-1.155		0	-1.155	5.89E-07	ANXA3,CLU,DDIT4,ECH1,FLNB,JUN,LDLR,NDRG1,PXDN,SELENBP1,TFRC,TIMP3
ELOVL5	0.049	enzyme		1.685		-0.093	1.912	5.94E-07	ACACA,Acot1,FADS1,FADS2,FASN,SCD
mibolerone		chemical drug	Inhibited	-3.13		0.049	-3.285	6.12E-07	ACACA,CLU,CYP51A1,FASN,FDPS,HMGCS1,JUN,LDLR,PRKCH,Scd2,TIMP3
CREB1	-0.001	transcription regulator		-0.517		0.049	-0.7	6.49E-07	ADM,BNIP3,CAMK1D,CCDC85A,CCN1,CPT1A,CRH,CYP51A1,FASN,FGF13,HMGCS1,IDI1,IGSF9B,JUN,LDLR,MVK,NEURL1B,PLAT,RIPOR2,SCD,Sik1,TFRC
methotrexate		chemical drug		0.632		0.021	0.567	7.84E-07	BNIP3L,CPT1A,CTSV,DGAT2,DUSP10,ECH1,FADS1,FASN,HMGCS1,IGFBP5,SCD,STAT5B,TEF,TIMP3
atorvastatin		chemical drug	Inhibited	-2.88		-0.023	-2.801	7.91E-07	CCN1,CCN2,CYP51A1,DHCR24,FDPS,HMGCS1,IDI1,JUN,LDLR,MAPK3,MVK,NSDHL,PLAT
tretinoin		chemical - endogenous mammalian	Activated	2.253		0.048	1.973	8.53E-07	ADM,AGO1,AKAP12,ALDH9A1,ANGPTL4,ANXA2,BNIP3,BNIP3L,CASP6,CCN1,CCN2,CHRM2,COL4A5,CPT1A,CRH,DKK3,ECE1,FABP5,FASN,FGF12,FGG,HEY1,HSPA2,IGFBP5,ITGA6,JUN,LOXL2,Marcks,MMP11,MSLN,NDRG1,PLAT,PRKCH,PROM1,SCD,SLC25A20,TAL1,TFRC,UBE2C,UBE2L6,VWF
CTNNB1	0.038	transcription regulator		-0.332		0.089	-0.679	1.01E-06	ACACA,CCN1,CCN2,CLU,COL4A5,CPT1A,CPT2,CTSF,CYP51A1,DGAT2,FASN,FGF18,HMGCS1,IDI1,IGFBP5,ITGA6,JUN,LBH,MAN2B1,Nes,PECAM1,PROM1,RAD23A,SALL1,SCD,SLC16A6,STAT5B,TIMP3,TUBB2B
isobutylmethylxanthine		chemical toxicant		-0.426		0.073	-0.643	1.21E-06	ANGPTL4,CCN2,Cox5b,CRH,DGAT2,GRIP1,JUN,MAPK3,Mt2,PLAT,SCD,Scd2,TIMP3
arsenic trioxide		chemical drug	Activated	2.788		0.014	2.737	1.25E-06	ARID3A,BNIP3,BNIP3L,CYP51A1,DHCR24,ECT2,FADS1,FASN,FDPS,HMGCS1,HSPA2,IDI1,MAF,NDUFA11,SCD,TFRC
IFT88	0.128	other		1.741		-0.029	1.811	1.38E-06	CYP51A1,FDPS,HMGCS1,IDI1,NSDHL,TIMP3
rosuvastatin		chemical drug	Inhibited	-2.433		0.027	-2.498	1.38E-06	CYP51A1,FDPS,HMGCS1,IDI1,LDLR,MVK
RETN		other		-0.284		0.085	-0.502	1.41E-06	ACACA,CCN2,FABP5,FASN,LDLR,PLAT,SCD
bezafibrate		chemical drug	Activated	2.018		0.101	1.743	1.42E-06	Acot1,ACOT2,ANGPTL4,BNIP3,ECH1,FASN,FGB,INSIG1,SCD
GNAQ	0.081	enzyme		0		0.117	-0.232	1.48E-06	ADM,ANXA3,BNIP3,BNIP3L,CCN2,CTSV,INSIG1,LMCD1,PLAT,SELENBP1
linoleic acid		chemical - endogenous mammalian		0.657		0.052	0.512	1.51E-06	ANGPTL4,CLU,CPT1A,FASN,LDLR,PECAM1,PLIN5,SCD
ERBB2	-0.023	kinase		-1.296		0.078	-1.631	1.70E-06	ANGPTL4,ANXA2,BNIP3,CCN2,CDT1,CLU,CPT2,CYP51A1,FASN,HEPH,HEY1,IDI1,IGF2R,IGFBP5,ITGA6,JUN,MAF,Marcks,MMP11,NDRG1,NID1,PLAT,PMEPA1,PROM1,TIMP3,UBE2C,VWF
SP600125		chemical - kinase inhibitor	Activated	2.414		-0.042	2.573	1.71E-06	ADM,BDH1,CCN1,CCN2,CYGB,CYP51A1,DDIT4,FABP5,FASN,ITGA6,JUN,LDLR,SCD,Scd2,SLC16A6
LEP		growth factor		1.757		0.057	1.54	1.72E-06	ACACA,ANGPTL4,CASP6,CCN1,CPT1A,CRH,CTSV,ECH1,FADS2,FASN,JUN,LDLR,NTS,PECAM1,PLAT,SCD,Scd2,STEAP4,TIMP3
RPTOR	-0.037	other	Inhibited	-2.985		0.089	-3.25	2.17E-06	CYP51A1,DHCR24,FDPS,HMGCS1,IDI1,JUN,LY75,MVK,NSDHL
HIF1A	-0.047	transcription regulator	Activated	2.172		0.098	1.788	2.18E-06	ADM,AKAP12,ANGPTL4,BNIP3,BNIP3L,CCN1,CCN2,DDIT4,EDNRB,H1-2,IGFBP5,JUN,LOXL2,NDRG1,PROM1,SDC4,SLC16A4,TFRC
AGT		growth factor		-1.56		0.071	-1.852	2.34E-06	ADM,ANXA3,CCN2,Cox5b,EDNRB,FASN,FGF13,HEY1,HMGCS1,IDI1,IGFBP5,JUN,LDLR,NDRG1,PECAM1,PPFIBP1,SHC1,SLC13A1,TFRC
TFAM	-0.012	transcription regulator		1.342		0.072	1.181	2.37E-06	CPT2,ECH1,FABP5,mt-Atp8,SLC25A20
FOS	-0.197	transcription regulator		-0.269		0.044	-0.413	2.74E-06	ACACA,ARID3A,CCN2,CLU,CRH,CTSV,FASN,GAS1,IGFBP5,ITGA6,JUN,MSLN,Mt2,NSDHL,NTS,PCYT2,PLAT,PMEPA1,SCD,SELENBP1,TAL1
PML	-0.02	transcription regulator		1.85		0.005	1.835	3.06E-06	ACACA,CPT1A,FASN,HMGCS1,IDI1,LDLR,MAF,NDRG1,PRKCH,SCD,SLC25A20
nitrofurantoin		chemical drug		1.035		0.018	0.974	3.06E-06	ANXA2,CASP6,CLU,CPT1A,CTSV,FGB,HMGCS1,MAPK3,PLAT,SELENBP1,TIMP3
ethanol		chemical - endogenous mammalian		0.531		0.043	0.367	3.11E-06	ACACA,ADM,CCN2,CLU,CPT1A,CRH,EDNRB,FASN,GPM6A,HEY1,JUN,LDLR,NSDHL,PLAT,SCD,Sik1,STAT5B
KDM3A	0.141	transcription regulator		0.896		0.128	0.584	3.37E-06	ADM,ARHGEF28,CCN1,CCN2,IL33,LOXL2
EGF	0.001	growth factor		0.533		0.091	0.161	3.77E-06	ACOT2,ANGPTL4,CCN1,CCN2,CLU,FASN,GAS1,HMGCS1,IDI1,IGFBP5,JUN,MAPK3,PLAT,PRKCH,PROM1,SCD,Scd2,SHC1,TIMP3,TNFRSF9
tamoxifen		chemical drug		1.361		0.007	1.336	4.08E-06	ACACA,ADM,CCN1,CLU,FADS1,FADS2,FASN,HMGCS1,JUN,LDLR,LOXL2,SALL1,SCD,Scd2,SHC1
KIF3A	0.087	enzyme	Activated	2.207		-0.093	2.413	5.01E-06	CYP51A1,FDPS,HMGCS1,IDI1,NSDHL
clozapine		chemical drug		-1.298		0.084	-1.516	5.55E-06	ACACA,FASN,FDPS,HMGCS1,LDLR,NTS,SCD
CCDC3	0.067	other						5.63E-06	ACACA,DGAT2,FASN
PDE8A	0.121	enzyme						5.63E-06	CYP51A1,FDPS,LDLR
YAP/TAZ		group						5.63E-06	CCN1,CCN2,PSAT1
lovastatin		chemical drug		-1.096		0.055	-1.241	6.86E-06	CCN2,FASN,FDPS,HMGCS1,LDLR,MVK,PLAT,SDC4,VWF,Xlr3c (includes others)
Hif1		complex	Activated	2.621		0.13	2.281	6.91E-06	ADM,BNIP3,BNIP3L,DDIT4,LOXL2,TFRC,TNFRSF9
trans-hydroxytamoxifen		chemical drug	Inhibited	-2.724		-0.023	-2.648	7.04E-06	ADM,ANXA3,CLU,COL4A5,DDIT4,ECH1,LOXL2,NDRG1,PXDN,SELENBP1,VEGFB
PPARD	-0.431	ligand-dependent nuclear receptor		-0.496		0.045	-0.651	7.13E-06	ACACA,ALDH9A1,ANGPTL4,BDH1,CPT1A,CPT2,ECH1,FASN,MAPK3,Pcp4l1,PLAT,SCD,SLC25A20
CDN1163		chemical reagent		1		-0.096	1.192	7.29E-06	ACACA,DGAT2,FASN,SCD
CLOCK	-0.04	transcription regulator		-0.447		-0.014	-0.416	8.42E-06	ANGPTL4,ARHGEF28,C1QBP,CCN2,CYP51A1,FASN,GALNT11,IGFBP5,PIP4K2C,RAD23A,RANGAP1,SCD,TEF
oleic acid		chemical - endogenous mammalian		-0.557		0.039	-0.672	8.43E-06	ACACA,ANGPTL4,CLU,DGAT2,FASN,LDLR,Mt2,PLIN5,SCD
25-hydroxycholesterol		chemical reagent		1.707		0.025	1.648	8.53E-06	FASN,FDPS,HMGCS1,INSIG1,JUN,LDLR,SCD
troglitazone		chemical drug	Activated	2.449		0.013	2.402	9.18E-06	Acot1,ACOT2,ANGPTL4,ANXA2,CPT2,CTNNAL1,DGAT2,ECH1,ECT2,FABP5,FADS2,FASN,ITGA6,JUN,NDRG1,SCD
lipopolysaccharide		chemical drug		1.578		0.07	1.162	1.04E-05	Acot1,ADM,ANGPTL4,ANXA3,CCN1,CCN2,CRH,CTSV,DDIT4,DDN,DHCR24,DKK3,FABP5,FASN,FGB,GAS1,GPM6A,HDC,HEY1,IGFBP5,IL33,INSIG1,JUN,MAF,Marcks,Mt2,NID1,NTS,PECAM1,PLAT,PMEPA1,SALL1,Scd2,SDC4,SLFN13,SNTB2,STEAP4,TCAP,TENT5C,TFRC,TIMP3,TNFRSF9,VWF,YBX3
SRF	0.04	transcription regulator		-1.992		0.059	-2.109	1.07E-05	AKAP12,CCN2,CORIN,EXTL2,FGF12,GPM6A,ITGA6,JUN,LBH,LDLR,LMCD1,NFATC2,Pcp4l1,TAL1,TCAP
Map3k7	0.021	kinase		0.64		0.104	0.387	1.15E-05	FASN,GAS1,JUN,MVK,NFATC2,PROM1,SCD
CCNC	-0.069	other		-1.432		0.123	-1.704	1.16E-05	ACACA,Cox5b,CPT2,FASN,SCD
sterol		chemical - endogenous mammalian		1.505		-0.075	1.672	1.40E-05	ACACA,FASN,FDPS,LDLR,Scd2
FGF21		growth factor		-0.802		0.063	-0.954	1.42E-05	ACACA,BDH1,CPT1A,DGAT2,FASN,LDLR
SB 216763		chemical toxicant	Inhibited	-2.416		0.103	-2.665	1.42E-05	ACACA,CCN1,CCN2,FASN,FGF18,SCD
gemfibrozil		chemical drug		1.492		0.067	1.317	1.54E-05	ACOT2,CPT1A,CPT2,ECH1,FGB,LDLR,SCD
eicosapentenoic acid		chemical drug		1		-0.021	1.059	1.54E-05	ANGPTL4,ECH1,FADS1,FADS2,JUN,LDLR,PROM1,SLC25A20
clofibrate		chemical drug	Activated	2.042		0.071	1.844	1.66E-05	Acot1,ACOT2,CPT1A,CPT2,ECH1,LDLR,Mt2,SCD
PPARGC1B	-0.139	transcription regulator	Inhibited	-2.577		0.114	-2.872	1.69E-05	ACACA,Cox5b,DHCR24,FASN,FDPS,MVK,SCD
CG		complex		1.053		0.094	0.705	1.88E-05	ADM,CLU,CTSV,FABP5,GAS1,IL33,JUN,LDLR,MAF,MAPK3,MVK,PECAM1,PLAT,SDC4,TENM4
GCK		kinase	Inhibited	-2		-0.017	-1.965	1.99E-05	CPT1A,CPT2,FASN,SCD,Scd2
LPIN1	-0.008	phosphatase		-1.96		0.048	-2.054	1.99E-05	ACACA,CPT1A,FASN,FDPS,SCD
IGF1R	0.042	transmembrane receptor		0.994		0.095	0.717	2.08E-05	ANXA3,CLU,Cox5b,CPT2,FASN,IGF2R,IGFBP5,PLAT,PROM1,Scd2,SDC4,SLC25A20,TIMP3
mifepristone		chemical drug		-1.957		-0.03	-1.844	2.20E-05	Acot1,ADM,CCN2,CLU,CTSF,DDIT4,DKK3,EDNRB,HDC,JUN,LDLR,NDRG1,PLAT,TIMP3
D-glucose		chemical - endogenous mammalian	Inhibited	-2.079		0.044	-2.254	2.29E-05	ACACA,ANXA3,CCN2,CDT1,CLU,CPT2,CTSV,DDIT4,FABP5,FASN,ITPR3,JUN,LDLR,Mt2,NTS,POPDC2,SCD,Scd2,SHC1,SLC16A4,TFRC
GW501516		chemical drug		1.964		0.097	1.773	2.38E-05	Acot1,ANGPTL4,CPT1A,ECH1,FASN,IGFBP5,PLAT,SCD
STAT5B	0.205	transcription regulator		0		0.016	-0.054	2.41E-05	Acot1,CASP6,CORIN,DGAT2,MAF,MYBPHL,MYL7,Pcp4l1,PROM1,SCD,SLN,STAT5B,TCAP
OSM		cytokine		0.767		0.053	0.542	2.42E-05	ACOT2,ANXA2,ANXA3,BMP10,CTSV,DHCR24,FASN,FGB,HSPA2,IL33,JUN,LDLR,Mt2,RAD23A,SLC16A6,TAL1,TECR,TIMP3,UBE2L6
Gm35986		other						2.77E-05	HMGCS1,IDI1,MVK
OBP2B		transporter						2.77E-05	CPT1A,FASN,SCD
ghrelin		biologic drug						2.77E-05	ACACA,FASN,SCD
PDGF BB		complex		-1.618		0.087	-1.936	2.79E-05	ADM,AKAP12,CCN1,CCN2,EDNRB,FASN,HMGCS1,JUN,LDLR,Mt2,PLAT,RYR3,SCD,Scd2
APP	0.121	other		0.278		0.051	0.122	2.86E-05	C1QBP,CCN2,CLU,CTSV,ECH1,HEY1,IGF2R,IGFBP5,ITGA6,ITPR3,JUN,KCNA4,LDLR,MAF,NDUFS6,NDUFS8,Nes,Pcp4l1,PLAT,RYR3,SDC4,SHC1,SLFN13,TUBB2A,TUBB2B,VEGFB
AR		ligand-dependent nuclear receptor		1.729		0.086	1.439	2.94E-05	ADM,CDT1,CORIN,CTSO,DDIT4,DHCR24,EDNRB,EXTL2,FABP5,IGFBP5,ITGA6,Marcks,NDRG1,PLAT,PMEPA1,Sik1,TIMP3,UBE2C
docosahexaenoic acid		chemical drug		1.782		-0.052	1.936	2.98E-05	ACACA,CCN2,CPT1A,FADS1,FADS2,FASN,LDLR,LOXL2,PLAT,SCD
WNT3A		cytokine	Inhibited	-2.188		0.074	-2.448	2.99E-05	CCN1,CCN2,CPT2,DDIT4,FGF18,GAS1,IGFBP5,JUN,LBH,Nes,PMEPA1,SDC4,TIMP3
rosiglitazone		chemical drug		1.213		0.046	1.032	3.01E-05	ANGPTL4,CCN2,Cox5b,CPT1A,CPT2,DGAT2,ECH1,FABP5,FASN,FGB,FGF13,IGFBP5,INSIG1,PECAM1,PLIN5,SCD,SLC25A20
fatty acid		chemical - endogenous mammalian		-0.625		0.109	-0.863	3.13E-05	ACACA,CCN1,FADS1,FADS2,FASN,LDLR,PLIN5,SCD
TNF		cytokine		-0.553		0.05	-0.858	3.27E-05	ACACA,ADM,AKAP12,ANGPTL4,CASP6,CCN1,CCN2,CLU,CPT1A,CPT2,CRH,CTSF,DUSP10,ECH1,EDNRB,FABP5,FADS1,FASN,FDPS,FGF18,FGG,HDC,IGFBP5,IL33,INSIG1,ITGA6,JUN,LDLR,MSLN,Mt2,NFATC2,NID1,PECAM1,PLAT,SCD,SDC4,STEAP4,TBC1D8,TFRC,TIMP3,TNFRSF9
triptolide		chemical drug		-1.667		-0.109	-1.34	3.29E-05	ADM,AKAP12,EDNRB,FGF18,HEY1,ITGA6,JUN,MMP11,PECAM1
simvastatin		chemical drug		0.43		-0.033	0.501	3.37E-05	ANXA3,CCN1,CCN2,FADS1,FADS2,H1-2,LDLR,PLAT,SDC4,VWF,Xlr3c (includes others)
FGF10		growth factor		0.243		0.138	-0.093	3.54E-05	ANXA2,ANXA3,CYP51A1,LDLR,SCD,TIMP3
valproic acid		chemical drug		-0.288		0.008	-0.315	3.61E-05	ACACA,CCN1,CPT1A,CRH,CYP51A1,FDPS,HMGCS1,IDI1,JUN,LDLR,Marcks,MVK,NSDHL,PIP4K2C,PLAT,PXN,SCD
HSF1	-0.156	transcription regulator		-1.287		0.031	-1.356	4.16E-05	ACACA,CCN2,CLU,Cox5b,FASN,JUN,LDLR,NFATC2,RANGAP1,SCD,SHC1
cobalt chloride		chemical reagent	Activated	2.592		0.098	2.338	4.28E-05	ADM,BNIP3,CLU,DDIT4,NDRG1,PROM1,TFRC
carbon tetrachloride		chemical toxicant		-0.132		0.089	-0.394	4.51E-05	CCN2,FGG,IGF2R,IGFBP5,JUN,MAPK3,Mt2,PECAM1,PRKCH,PROM1,TIMP3
CFTR		ion channel		1.254		-0.011	1.283	4.63E-05	FADS1,FADS2,FDPS,IDI1,MYL7,SCD,Scd2
dihydrotestosterone		chemical - endogenous mammalian		0.76		0.069	0.481	4.77E-05	ACACA,ADM,CCN2,CLU,CPT1A,DHCR24,FASN,IGFBP5,JUN,LDLR,MAF,NDRG1,PMEPA1,RAD23A,SCD,SELENBP1,SHC1,SLC16A6,TIMP3
DGAT2	0.436	enzyme						4.80E-05	ACACA,DGAT2,SCD
triolein		chemical drug						4.80E-05	FADS1,FADS2,FASN
FGF19		growth factor						4.99E-05	ACACA,FABP5,FASN,FDPS,PROM1,SCD,Scd2
8-bromo-cAMP		chemical reagent		-0.543		0.081	-0.795	5.26E-05	ADM,CCN2,CLU,CRH,ITPR3,JUN,LDLR,Nes,PLAT,SHC1
ESR1		ligand-dependent nuclear receptor		-0.091		0.02	-0.183	5.32E-05	ACACA,ANXA3,CASP6,CCN1,CENPL,CHRM2,COG7,Cox5b,DDIT4,DHCR24,DUSP10,EML1,FASN,FGF12,FXYD6,HEY1,HSPA2,IGFBP5,ITGA6,JUN,LDLR,MRPL52,NDUFA11,PRKCH,PROM1,PSAT1,ROBO2,SCD,Scd2,STAT5B,TFRC,TRAK1,ZNF367
PTEN	-0.105	phosphatase		1.248		-0.005	1.266	5.35E-05	ACACA,ADM,CTSV,FASN,GPM6A,HMGCS1,IDI1,IGFBP5,ITPR3,LDLR,MRPL12,NDRG1,NTS,PECAM1,PXN,RANGAP1,SCD,SDC4,STAT5B,TNFRSF9,VEGFB
Ca2+		chemical - endogenous mammalian		0.905		0.078	0.65	5.52E-05	CCN1,FABP5,FASN,GRIP1,HDC,IL33,ITGA6,ITPR3,JUN,NDRG1,Nes,NFATC2
xanthohumol		chemical drug		0.447		-0.118	0.711	5.70E-05	ACACA,DGAT2,FASN,SCD,SLN
NR0B2	-0.162	ligand-dependent nuclear receptor		1.091		-0.109	1.305	5.80E-05	ACACA,CCN2,CPT1A,CYP51A1,FASN,HDC,SCD
SCD	-1.04	enzyme	Inhibited	-2.37		-0.043	-2.268	6.42E-05	ACACA,ANGPTL4,CPT1A,FASN,Scd2,TNFRSF9
CIDEC		other		-1.33		-0.088	-1.143	6.50E-05	Cox5b,CPT1A,DGAT2,FASN,SCD
NUPR1	0.211	transcription regulator		0.093		-0.043	0.269	6.59E-05	ADM,AKAP12,BNIP3,CARMIL1,CCN1,CENPL,DHCR24,EXTL2,FAM114A1,HSPA2,IRF2BP2,ITPR3,NDRG1,Nes,SLC16A6,SLC25A20,SPC25
CYB5R4	-0.09	enzyme		0.747		-0.13	1.002	6.65E-05	FASN,Mt2,SCD,Scd2
GW3965		chemical reagent		-1.166		-0.015	-1.126	7.05E-05	DGAT2,FABP5,FADS2,FASN,FDPS,LDLR,PCYT2,SCD
Vegf		group		-0.193		0.106	-0.599	7.08E-05	AKAP12,ANGPTL4,CCN1,HDC,INSIG1,ITGA6,ITPR3,JUN,KIF20B,LDLR,LY75,Mt2,TBC1D8,TNFRSF9,UBE2C,VEGFB,VWF
NR1D1	-0.001	ligand-dependent nuclear receptor						7.39E-05	ACACA,BNIP3,CTSV,FADS2,FASN
ARNT	0.017	transcription regulator		1.982		0.116	1.753	7.47E-05	ADM,ANGPTL4,BNIP3,GAS1,LOXL2,RANGAP1,TFRC,UBE2C
ACLY	-0.022	enzyme						7.62E-05	ACACA,FASN,SCD
C4BP		complex						7.62E-05	CYP51A1,HMGCS1,IDI1
miR-217-5p (and other miRNAs w/seed ACUGCAU)		mature microrna						7.62E-05	ACACA,FASN,SCD
forskolin		chemical toxicant		1.05		0.069	0.798	8.10E-05	ADM,AKAP12,BNIP3L,CCN2,CLU,CRH,CTSV,DDIT4,GRIP1,HSPA2,IGFBP5,ITPR3,JUN,MAPK3,Mt2,PLAT,PPM1F,RANGAP1,SHC1,Sik1,YBX3
INS		other		-1.864		0.021	-1.917	8.39E-05	ACACA,ADM,CCN1,CCN2,CPT1A,FASN,IGFBP5,JUN,SCD
OGA	0.019	enzyme		1.291		-0.014	1.343	9.52E-05	CAMK1D,FDPS,FGF13,FGF18,FLNB,GAS1,HMGCS1,IGFBP5,JUN,MMRN2,NDUFA11,NSDHL,PROM1,Scd2,TIMP3
ESR2		ligand-dependent nuclear receptor	Inhibited	-2.138		0.025	-2.209	9.62E-05	AKAP12,CCN2,CLU,DUSP10,FASN,HMGCS1,HSPA2,MAPK3,MSLN,NDRG1,PLAT,PRKCH,PROM1,PSAT1,SHC1,TENM4,VWF
ACSS2	-0.036	enzyme		-1		0.144	-1.288	9.86E-05	DGAT2,DHCR24,FASN,SCD
BDNF		growth factor		0.115		0.061	-0.053	1.01E-04	ANXA2,CCN1,CYGB,FLNB,HSD17B12,HSPA2,JUN,PRSS12,RYR3,Sik1,SPRED2,TBC1D8,TFRC
UCP1		transporter		0.146		0.025	0.073	1.06E-04	ACACA,ACOT2,CTSV,DKK3,EML1,FASN,PSAT1,SLN,TENM4
STAT6	0.136	transcription regulator		0.422		0.019	0.355	1.08E-04	Acot1,CAMK1D,CASP6,CPT1A,FADS1,FASN,IGF2R,IL33,LY75,MAF,MVK,NFATC2,Scd2,SELENBP1,STAT5B
progesterone		chemical - endogenous mammalian	Activated	2.716		0.034	2.587	1.10E-04	Acot1,ADM,CDT1,CRH,CTSF,CTSV,HDC,HEY1,HSPA2,IGFBP5,JUN,NDRG1,RYR3,SCD,Scd2,STAT5B,TBC1D8,TIMP3,VEGFB
TEAD4	0.086	transcription regulator		0.277		0.093	0.071	1.16E-04	ADM,CCN1,CCN2,DGAT2,IGFBP5,JUN,RHOBTB1
CYP7A1		enzyme		-1.982		-0.006	-1.97	1.18E-04	ACACA,FASN,FDPS,LDLR
Pde4		group		1.982		-0.044	2.069	1.18E-04	CRH,CYP51A1,FDPS,LDLR
fibric acid derivative		chemical drug		-0.339		0.026	-0.391	1.18E-04	ACACA,FADS2,FASN,SCD
pitavastatin		chemical drug		-1.987		0.119	-2.223	1.18E-04	CYP51A1,FDPS,HMGCS1,IDI1
MYC	0.026	transcription regulator		-0.452		0.057	-0.721	1.22E-04	ACACA,ADM,AKAP12,C1QBP,CLU,CPT1A,CPT2,CTNNAL1,CTSV,DDIT4,FABP5,FADS2,FASN,GAS1,ITGA6,JUN,MAPK3,MRPL12,Mt2,NDRG1,PECAM1,PROM1,PSAT1,SCAMP5,SCD,Scd2,TFRC,UBE2C,YBX3
BATF2		other						1.27E-04	CCN1,JUN
RB1	-0.072	transcription regulator		-0.816		0.031	-0.893	1.27E-04	BNIP3,CASP6,CCN2,CDT1,LOXL2,MAF,MAPK3,MRPL12,PMEPA1,PPFIBP1,PROM1,RYR3,SNTB2,TCAP,TNNI2,UBE2C
FASN	-0.307	enzyme		-1.741		0.076	-1.926	1.29E-04	ACACA,DDIT4,DGAT2,EDNRB,FASN,SCD
ERG	0.026	transcription regulator	Activated	2.449		0.116	2.166	1.33E-04	CAMK1D,FLNB,ITGA6,NDRG1,PECAM1,PLAT,PXN,RHOBTB1,RYR3,VWF
MRTFB	-0.042	transcription regulator		0		0.063	-0.137	1.34E-04	ADM,CCN1,CCN2,DHCR24,FADS2,IGFBP5,ITGA6,RHOBTB1,TAL1
RIPK2	0.164	kinase		1.633		0.09	1.413	1.39E-04	ACACA,DGAT2,FASN,IL33,LDLR,SCD
TEAD1	-0.157	transcription regulator		0.816		0.109	0.549	1.39E-04	ADM,CCN1,CCN2,IGFBP5,MSLN,RHOBTB1
bromobenzene		chemical toxicant	Activated	2		0.01	1.981	1.39E-04	CTSV,FDPS,HMGCS1,JUN,Mt2,TUBB2B
IL13		cytokine		-1.17		0.069	-1.403	1.40E-04	CASP6,CCN2,CTNNAL1,CTSV,DHCR24,DUSP10,FADS1,FADS2,FGG,HDC,JUN,MAF,NID1,SLC16A6,TFRC
cephaloridine		chemical drug		-0.239		0.086	-0.466	1.40E-04	ANGPTL4,CCN2,CDT1,DDIT4,FGB,TFRC,ZNF367
DICER1	-0.018	enzyme		0		0.003	-0.009	1.56E-04	ANGPTL4,ARID3A,CCN1,CRH,DHCR24,IGF2R,ITGA6,JUN,LPAR3,MAF,RAD23A,RANGAP1
SIK1/SIK1B		kinase						1.61E-04	ACACA,FASN,SCD
GNA14		enzyme						1.63E-04	ADM,AKAP12,ANXA3,BNIP3,PLAT,SELENBP1
JUN	-0.379	transcription regulator		-0.589		0.08	-0.835	1.64E-04	AKAP12,ANXA2,CCN1,CCN2,CLU,CRH,CYGB,HEY1,IGF2R,JUN,MAF,MAPK3,NTS,PXDN,SCD,TIMP3
NCOR-LXR-Oxysterol-RXR-9 cis RA		complex		-1		0.109	-1.219	1.66E-04	ACACA,CYP51A1,FASN,SCD
halofuginone		chemical drug						1.68E-04	AKAP12,CCN2,CYGB,DKK3,EDNRB,FXYD6,PROM1,Scd2
RXRA	-0.104	ligand-dependent nuclear receptor		-0.059		0.029	-0.129	1.71E-04	ACACA,Acot1,CPT1A,CPT2,FABP5,FADS2,FASN,FGG,INSIG1,MMP11,MYL7,SCD
LIF		cytokine		-1.886		0.038	-1.998	1.88E-04	ACACA,FGB,FGG,HEY1,JUN,mt-Atp8,Nes,PECAM1,TAL1,VWF
ritonavir		chemical drug						2.15E-04	CTNNAL1,ECT2,FADS2,FDPS,IDI1,LDLR,MVK,SCD
tetradecanoylphorbol acetate		chemical drug		0.974		0.075	0.606	2.16E-04	ADM,ANGPTL4,BNIP3L,CCN1,CCN2,CRH,CTSV,DDIT4,ECE1,HDC,HSPA2,IGFBP5,ITPR3,JUN,KLHL4,LBH,LDLR,LOXL2,MAF,MMP11,MRPL12,NTS,PECAM1,PLAT,PRKCH,SDC4,STAT5B,TEF
desmosterol		chemical - endogenous mammalian						2.19E-04	DHCR24,LDLR,Scd2
TEAD3	0.148	transcription regulator		0.447		0.131	0.154	2.23E-04	ADM,CCN1,CCN2,IGFBP5,RHOBTB1
cerivastatin		chemical drug		-0.585		-0.013	-0.556	2.36E-04	CCN2,FDPS,HMGCS1,IDI1,JUN,PLAT
KRAS	0.012	enzyme		-1.803		0.004	-1.816	2.37E-04	BDH1,BNIP3,CCN2,CDT1,CLU,FASN,GAS1,H1-2,IL33,JUN,LBH,MSLN,NETO2,PECAM1,PLAT,PPFIBP1,SCD,SDC4,TIMP3
LDL		complex		0.333		0.081	0.109	2.40E-04	CASP6,CCN2,ECE1,EDNRB,FDPS,INSIG1,JUN,LDLR,PECAM1,PLAT,SHC1
hydrogen peroxide		chemical - endogenous mammalian		0.11		0.081	-0.183	2.56E-04	ANXA2,CCN2,CLU,CYP51A1,DDIT4,DUSP10,FASN,FDPS,HDC,INSIG1,ITGA6,JUN,LDLR,SHC1,TFRC,TUBB2A
NCOA2	-0.001	transcription regulator	Inhibited	-2.607		0.084	-2.826	2.68E-04	CYP51A1,FASN,FGB,HMGCS1,IDI1,LDLR,NSDHL
HSPA5	-0.039	enzyme		0.109		0.044	0.013	2.70E-04	CLU,CPT1A,FASN,IDI1,SCD
PNPLA2	0.069	enzyme		1.264		0.065	1.121	2.70E-04	Acot1,ACOT2,CPT1A,CPT2,FASN
TEAD2	0.067	transcription regulator		0.447		0.137	0.141	2.70E-04	ADM,CCN1,CCN2,IGFBP5,RHOBTB1
testosterone		chemical - endogenous mammalian		-1.379		0.064	-1.603	2.78E-04	ANXA3,CLU,CTSV,CYP51A1,DDIT4,DHCR24,HDC,IGFBP5,IL33,JUN,NDRG1,PXN,TUBB2A
PD98059		chemical - kinase inhibitor		0.19		-0.091	0.542	2.84E-04	AKAP12,BDH1,BNIP3,CCN2,CLU,CRH,ECE1,EDNRB,FASN,INSIG1,JUN,LDLR,MAPK3,MMP11,PLAT,SELENBP1,TUBB2A
8-hydroxyeicosapentaenoic acid		chemical - endogenous mammalian						2.90E-04	ANGPTL4,CPT1A,CPT2
CTNNBIP1	0.01	other						2.90E-04	CYP51A1,HMGCS1,IDI1
LAMTOR1	0.002	other						2.90E-04	ACACA,FASN,SCD
NRG4	-0.006	growth factor						2.90E-04	ACACA,FASN,SCD
carbohydrate		chemical - endogenous mammalian		-1.067		0.133	-1.331	3.01E-04	ACACA,CPT1A,FASN,SCD
MTORC1		complex		-1.86		0.113	-2.07	3.24E-04	FASN,FDPS,IDI1,INSIG1,SCD
ERBB3	-0.005	kinase		-1.134		0.019	-1.185	3.33E-04	CCN1,CCN2,CLU,IGFBP5,NDRG1,NID1,TIMP3
TGFB2	-0.014	growth factor		-0.96		0.057	-1.107	3.51E-04	ANGPTL4,CCN2,GAS1,HEY1,NFATC2,PECAM1,SCD
LY294002		chemical - kinase inhibitor		1.053		-0.11	1.478	3.53E-04	ACACA,CCN1,CCN2,DHCR24,FASN,HMGCS1,IDI1,IGFBP5,JUN,MAF,NDRG1,NTS,SCD,SNTB2,UBE2C,VAMP1
LMNB1	-0.084	other	Activated	2.219		-0.062	2.356	3.54E-04	CYP51A1,FASN,HMGCS1,LDLR,SCD
spironolactone		chemical drug	Activated	2.393		-0.044	2.5	3.55E-04	ACACA,CCN2,EDNRB,FASN,SCD,TIMP3
Creb		group		0.044		0.073	-0.158	3.64E-04	ADM,CCN1,CPT1A,CRH,CTSV,CYP51A1,FLNB,JUN,LDLR,NTS,PLAT,PPFIBP1
PEX5L		ion channel						3.73E-04	FDPS,IDI1,MVK
digoxin		chemical drug						3.73E-04	ACACA,FASN,NDRG1
bexarotene		chemical drug		1.455		0.062	1.271	3.73E-04	CCN1,Cox5b,DDIT4,LOXL2,MAF,Nes,NTS,PLAT,SCD
AMOT	0.177	other						3.78E-04	CCN1,CCN2
AMOTL1	0.094	other						3.78E-04	CCN1,CCN2
AMOTL2	-0.053	other						3.78E-04	CCN1,CCN2
ELOVL2		enzyme						3.78E-04	FASN,SCD
Fascin		group						3.78E-04	CCN1,CCN2
G protein beta gamma		complex						3.78E-04	CCN1,CCN2
Ggtase I		complex						3.78E-04	CCN1,CCN2
phosphoramidon		chemical - endogenous non-mammalian						3.78E-04	ECE1,EDNRB
tolylfluanid		chemical toxicant						3.78E-04	FASN,SCD
mycophenolic acid		chemical drug		0.816		0.092	0.591	4.04E-04	ADM,AKAP12,CCN1,CCN2,CLU,LDLR
1,4-bis[2-(3,5-dichloropyridyloxy)]benzene		chemical toxicant		0.644		0.094	0.399	4.10E-04	ACACA,CPT1A,FASN,IGF2R,INSIG1,SCD,STEAP4
actinomycin D		biologic drug		0.736		-0.072	0.961	4.19E-04	ADM,CCN1,CCN2,FASN,FGB,IGFBP5,ITPR3,JUN,PXN,TNFRSF9
NPC1	0.137	transporter						4.30E-04	CYP51A1,HMGCS1,IDI1,LDLR,MVK,SCD
Insulin		group		-1.486		0.039	-1.617	4.44E-04	ACACA,ANGPTL4,CCN2,Cox5b,CRH,DDIT4,DGAT2,FADS1,FADS2,FASN,FGB,INSIG1,JUN,SCD,Scd2
indomethacin		chemical drug		0.213		0.043	0.086	4.48E-04	ANXA2,CLU,CPT1A,CRH,FASN,FGB,FGF18,LDLR,LOXL2,PROM1
EFNA2	-0.026	kinase		0.447		0.011	0.422	4.56E-04	CCN2,FABP5,PLAT,PXN,UBE2C
ATXN7	0.043	other						4.71E-04	IGFBP5,Marcks,Sik1
IL5		cytokine		0.302		0.137	-0.153	4.83E-04	ANXA2,BNIP3,BNIP3L,DENND11,IDI1,NDRG1,PSAT1,RIPOR2,Scd2,TNFRSF9,TUBB2B
miR-29b-3p (and other miRNAs w/seed AGCACCA)		mature microrna		-0.647		-0.144	-0.3	4.86E-04	ANGPTL4,COL4A5,INSIG1,LOXL2,NID1,TUBB2A
GPER1		g-protein coupled receptor		-1.475		0.119	-1.732	4.94E-04	CCN1,CCN2,DDIT4,FASN,JUN
CD38	0.092	enzyme		0.768		0.129	0.408	5.00E-04	ANXA2,BNIP3,BNIP3L,DENND11,NDRG1,PSAT1,Scd2,TUBB2B
HSD11B1		enzyme						5.00E-04	ACACA,ANGPTL4,CPT1A,FASN
NPPB		other		1.98		-0.099	2.176	5.00E-04	CCN2,HMGCS1,IDI1,LDLR
lithium chloride		chemical drug		-1.195		0.077	-1.398	5.00E-04	CYP51A1,FDPS,HMGCS1,IDI1,Marcks,PXN,RSPO1
NFKBIA	0.188	transcription regulator		0.311		0.041	0.172	5.32E-04	BNIP3,CLU,CTSF,HEY1,IGF2R,IL33,JUN,Mt2,NID1,PLAT,PMEPA1,SDC4,TFRC,TIMP3
MAPK9	0.071	kinase		-0.8		0.061	-0.972	5.65E-04	ACACA,CCN2,CDT1,FASN,HDC,JUN,PLAT,SCD
amlodipine		chemical drug						5.84E-04	ANXA2,IGFBP5,LDLR
orotic acid		chemical - endogenous mammalian						5.84E-04	ACACA,FASN,SCD
sea cucumber body wall meal		chemical reagent						5.84E-04	ACACA,CPT1A,FASN
PRKAG3	-0.211	other						6.12E-04	ANGPTL4,DUSP10,FXYD6,IGFBP5,ITGA6,LMCD1,Scd2,TFRC
SETD2	-0.084	enzyme		1		-0.062	1.123	6.29E-04	CCN1,CCN2,JUN,VEGFB
methylnitrosourea		chemical toxicant						6.29E-04	CLU,FASN,JUN,TIMP3
STAT3	0.081	transcription regulator		1.077		0.071	0.804	6.94E-04	ADM,ANGPTL4,BNIP3L,CCN2,ECT2,FASN,FGB,FGG,HEY1,IGFBP5,MAF,mt-Atp8,NDRG1,NFATC2,PECAM1,PROM1,SLFN13
ACACB	-0.027	enzyme						7.13E-04	ACACA,FASN,SCD
IGF2	0.059	growth factor						7.16E-04	CASP6,CCN2,CTSV,GAS1,IGF2R,IGFBP5,MMP11,NDRG1
genistein		chemical drug		1.222		0.039	1.09	7.40E-04	ADM,ANGPTL4,CCN2,CLU,CTSF,CTSO,CTSV,EXTL2,IGF2R,JUN,LDLR,MAN2B1,PLAT
cisplatin		chemical drug		0.626		0.054	0.435	7.45E-04	ANXA2,BNIP3L,CASP6,CCN2,CLU,CPT1A,CPT2,DDIT4,ECE1,FASN,FGB,GAS1,HMGCS1,JUN,PIP4K2C,PLAT,PROM1,PXN,TIMP3,ZNF334
PSME3	0.032	peptidase						7.49E-04	ACACA,FASN
SRT2183		chemical reagent						7.49E-04	FASN,LDLR
ibotenic acid		chemical toxicant						7.49E-04	CRH,JUN
methylpiperidinyl-3b-hydroxycholenamide		chemical reagent						7.49E-04	DHCR24,LDLR
ATF6	0.07	transcription regulator		0.555		0.11	0.31	7.79E-04	CPT1A,CPT2,FDPS,PLAT,UBE2C
NORAD		other	Inhibited	-2		0.136	-2.272	7.80E-04	CCN1,CCN2,JUN,LMCD1
MTOR	0.058	kinase		0.895		0.043	0.774	7.90E-04	ACACA,ADM,BNIP3,CPT2,DDIT4,FABP5,FASN,FDPS,FGB,NEURL1B,PECAM1,UBE2C
LDLR	-0.338	transporter						8.09E-04	ACACA,FABP5,FADS2,FASN,FDPS,LDLR,PCYT2,SCD,UBE2C
tunicamycin		chemical - endogenous non-mammalian		0.388		0.079	0.184	8.09E-04	ACACA,CPT1A,CPT2,DDIT4,DGAT2,FASN,NDRG1,PROM1,SCD
CDK19	0.093	kinase		0.447		-0.102	0.675	8.15E-04	CLU,DDIT4,FADS2,HMGCS1,JUN,MVK
SP1	-0.002	transcription regulator		0.141		0.125	-0.105	8.33E-04	AKAP12,BNIP3L,C1QBP,CCN2,CYP51A1,DHCR24,FASN,HDC,JUN,LDLR,Marcks,MMP11,NDRG1,PROM1,TIMP3,VWF
tributyrin		chemical drug		0.555		0.135	0.255	8.36E-04	ADM,AKAP12,CCN1,CCN2,NDRG1
UCP2	0.308	transporter						8.58E-04	FASN,HDC,SCD
glutamyl-Se-methylselenocysteine		chemical - endogenous mammalian						8.58E-04	CLU,JUN,TIMP3
LGALS3	0.273	other						8.60E-04	CTSF,CTSV,IGFBP5,ITGA6,ITPR3,NFATC2
calcitriol		chemical drug		-0.736		-0.013	-0.688	8.64E-04	ANXA2,CCN1,CDT1,CPT1A,DUSP10,ECH1,ECT2,FASN,FDPS,FGG,IGFBP5,JUN,LBH,MAF,PMEPA1,SLC13A1
THRA	0.029	ligand-dependent nuclear receptor		-1.414		0.009	-1.427	8.70E-04	ACACA,ANGPTL4,CPT1A,FASN,JUN,LDLR,PROM1
EFNA1	0.051	other		0.447		-0.031	0.516	8.96E-04	CCN2,FABP5,PLAT,PXN,UBE2C
ADIPOQ		other		-1.616		0.015	-1.656	8.97E-04	ACACA,CASP6,CCN2,CRH,FASN,LDLR,SCD,SHC1
KDM5B	0.101	transcription regulator		0.954		-0.07	1.124	9.09E-04	CCN2,DHCR24,ECT2,FABP5,INSIG1,TAL1,TUBB2A
aspirin		chemical drug	Inhibited	-2.121		-0.087	-1.875	9.30E-04	ADM,AKAP12,EDNRB,FGF18,HEY1,ITGA6,MMP11,PECAM1
sucrose		chemical - endogenous mammalian		-1.715		0.113	-1.909	9.54E-04	ACACA,CRH,FASN,SCD
AHR	0.084	ligand-dependent nuclear receptor		-1		0.016	-1.052	9.57E-04	ACACA,ADM,GAS1,ITGA6,JUN,Mt2,NID1,Pcp4l1,PLAT,SCD,STEAP4,TIMP3
15(S)-HETE		chemical - endogenous mammalian						1.02E-03	JUN,MAPK3,PECAM1
AGPAT2	0.134	enzyme						1.02E-03	ACACA,FASN,SCD
ATP2A2	-0.016	transporter						1.02E-03	DGAT2,FASN,SCD
acadesine		chemical drug						1.02E-03	ACACA,FASN,LDLR
mannitol		chemical - endogenous mammalian						1.02E-03	CCN2,HDC,JUN
NRG1		growth factor		0.861		0.081	0.651	1.04E-03	BNIP3,CCN1,CCN2,FABP5,IDI1,JUN,MAF,NDRG1,PXN,VEGFB
YAP1	-0.025	transcription regulator						1.04E-03	ACACA,CCN1,CCN2,CPT1A,CPT2,FASN,HMGCS1,MSLN,NDUFS8,TFRC
IL4		cytokine		1.758		0.075	1.429	1.05E-03	ANXA2,BNIP3,BNIP3L,CAMK1D,CASP6,CCN2,FADS1,FASN,FLNB,IGF2R,IL33,JUN,LY75,MAF,MAPK3,MVK,NDRG1,NFATC2,Scd2,STAT5B,TFRC,TIMP3,TNFRSF9
carbamylcholine		chemical drug		-1.24		0.07	-1.378	1.05E-03	CHRM2,ECE1,ITPR3,JUN
SPDEF		transcription regulator		-0.447		-0.094	-0.236	1.10E-03	CCN2,COL4A5,DKK3,ITGA6,VEGFB
ZBTB7B	-0.142	transcription regulator		-1		0.086	-1.173	1.10E-03	Cox5b,ECH1,HMGCS1,HSD17B12,MAF
F2R	0.132	g-protein coupled receptor		0.577		0.094	0.351	1.12E-03	CCN1,CCN2,ECE1,ITGA6,PLAT,VWF
NR1H2	-0.066	ligand-dependent nuclear receptor	Inhibited	-2.216		0.01	-2.237	1.12E-03	ACACA,FASN,FDPS,LDLR,SCD,TNFRSF9
vorinostat		chemical drug		1.265		0.006	1.246	1.13E-03	CLU,CYP51A1,HMGCS1,IDI1,JUN,LDLR,MVK,NDRG1,NFIC,TAL1
let-7a-5p (and other miRNAs w/seed GAGGUAG)		mature microrna		-0.898		-0.144	-0.497	1.19E-03	AARSD1,COL4A5,FADS2,LOXL2,NID1,PXDN,SCD,TUSC2
MTM1	-0.141	phosphatase						1.20E-03	BNIP3,BNIP3L,CTSV
NUMB	0.103	other						1.20E-03	HEY1,Mt2,PROM1
FA2H		enzyme						1.24E-03	FASN,SCD
GYS2		enzyme						1.24E-03	ACACA,FASN
LSP1	0.112	other						1.24E-03	ITGA6,PECAM1
MIR4269		microrna						1.24E-03	CCN1,CCN2
PCA3		other						1.24E-03	NDRG1,PMEPA1
SLC22A2		transporter						1.24E-03	CPT1A,CPT2
TCOF1	0.007	transporter						1.25E-03	ADM,ANXA2,BNIP3,BNIP3L,NDRG1
NR4A1	-0.085	ligand-dependent nuclear receptor		1.067		-0.03	1.128	1.26E-03	ACACA,ADM,FASN,HDC,LDLR,NDUFS6,NDUFS8,SCD,TNFRSF9,UBE2C
THRB	0.379	ligand-dependent nuclear receptor		-0.128		0.015	-0.164	1.26E-03	ACACA,CPT1A,FASN,FDPS,H1-2,JUN,LDLR,MAPK3,PROM1,STAT5B
EFNA4	0.187	kinase		1		-0.034	1.069	1.26E-03	CCN2,FABP5,PLAT,UBE2C
NKX2-5	-0.307	transcription regulator		0.338		0.108	0.131	1.26E-03	ACACA,BMP10,ECE1,Nes
IGF1	-0.009	growth factor		-0.036		0.069	-0.289	1.30E-03	ACACA,ADM,CCN1,CCN2,CLU,DDIT4,FASN,HDC,IGFBP5,JUN,MAPK3,SCD,SPRED2,YBX3
ATM	-0.118	kinase		0.555		0.093	0.348	1.33E-03	CCN2,CLU,DUSP10,IL33,JUN
Esrra	-0.181	transcription regulator	Inhibited	-2		0.036	-2.073	1.36E-03	BDH1,Cox5b,CPT1A,CPT2,ECH1,Scd2
Growth hormone		group		-0.785		0.06	-0.93	1.37E-03	ACACA,ANGPTL4,CLU,FASN,FDPS,FGG,IGFBP5,JUN,LDLR
EFNA3		kinase		1		-0.03	1.06	1.38E-03	CCN2,FABP5,PLAT,UBE2C
IAPP		other						1.40E-03	CYP51A1,HMGCS1,IDI1
MLX	-0.067	transcription regulator						1.40E-03	ACACA,FASN,SCD
WT1	0.238	transcription regulator		1.199		0.02	1.161	1.46E-03	CCN2,CTSV,FDPS,IDI1,MSLN,NDRG1,PECAM1,Scd2,TIMP3
PGR		ligand-dependent nuclear receptor	Activated	3.076		0.091	2.795	1.48E-03	CPT2,CRH,HSPA2,IGFBP5,ITGA6,NDRG1,PRKCH,SNTB2,STAT5B,TBC1D8
PRL		cytokine		1.437		0.097	1.135	1.48E-03	ANXA2,ANXA3,CLU,CRH,CTSV,IGFBP5,JUN,Marcks,PLAT,TECR
IL1B		cytokine		0.792		0.056	0.55	1.52E-03	ADM,ANGPTL4,CCN2,CRH,CTSF,DDIT4,FABP5,FGB,FGF18,FGG,IGFBP5,IL33,JUN,LDLR,MMP11,Mt2,NFATC2,PLAT,SDC4,TIMP3,TNFRSF9,UBE2L6
plicamycin		chemical drug		-0.284		-0.059	-0.142	1.57E-03	BNIP3L,CCN2,FASN,Marcks,PROM1,VWF
MAPK1	-0.058	kinase		-0.493		0.001	-0.497	1.57E-03	AKAP12,ANGPTL4,CCN2,HDC,IGSF9B,JUN,MAPK3,PRSS12,PSAT1,TNFRSF9,UBE2C,UBE2L6
ADAM12	0.108	peptidase		-0.391		-0.036	-0.31	1.59E-03	CCN2,COL4A5,IGFBP5,IL33,VWF
FBN1	0.171	other						1.62E-03	CCN1,CCN2,TIMP3
FUT8	-0.077	enzyme						1.62E-03	GAS1,PROM1,TFRC
EFNA5	-0.126	kinase		1		-0.044	1.087	1.64E-03	CCN2,FABP5,PLAT,UBE2C
ZMPSTE24	-0.054	peptidase		-1.192		-0.072	-1.049	1.64E-03	CTSV,DDIT4,IGFBP5,STAT5B
dimethylnitrosamine		chemical toxicant						1.64E-03	IGFBP5,MAPK3,Mt2,PRKCH
IL6		cytokine		-0.286		0.075	-0.576	1.64E-03	ADM,CCN2,CLU,CRH,FGB,FGG,IGFBP5,JUN,LDLR,MAF,Mt2,PECAM1,PLAT,PROM1,SPC25,STEAP4,TAL1,TFRC,UBE2C
RORA	0.153	ligand-dependent nuclear receptor						1.67E-03	ACOT2,DHCR24,FASN,Mt2,NSDHL,SCD,Scd2,SELENBP1
SMAD7	0.232	transcription regulator		-0.24		-0.042	-0.131	1.73E-03	CCN2,ITGA6,PLAT,PMEPA1,PROM1,SCD,TIMP3
estrogen receptor		group		0		-0.002	0.006	1.73E-03	AGO1,CCN2,COL4A5,FGF12,FGF13,JUN,LDLR,LOXL2,TIMP3
D-fructose		chemical - endogenous mammalian		-0.849		0.115	-1.077	1.78E-03	ACACA,FASN,SCD,TIMP3
KLF1		transcription regulator						1.78E-03	EPB41,KLF3,PECAM1,TFRC
MED13	-0.036	transcription regulator		-1		-0.05	-0.9	1.78E-03	ACACA,FASN,SCD,Sik1
testosterone propionate		chemical drug		-1		0.048	-1.096	1.78E-03	ADM,CLU,FDPS,LDLR
bleomycin		chemical drug		0.137		0.126	-0.191	1.78E-03	CCN2,HEY1,NFATC2,PLAT,SDC4,TIMP3,UBE2C,VWF
IL3		cytokine		0.447		0.101	0.222	1.84E-03	BNIP3L,CPT1A,ECH1,FASN,HSPA2,IL33,JUN,LY75,MAN2B1,TAL1,TNFRSF9
F Actin		complex						1.85E-03	CCN2,CTSV
Fructus xanthii aqueous extract		chemical - endogenous non-mammalian						1.85E-03	FASN,SCD
RO4929097		chemical drug						1.85E-03	HEY1,PECAM1
YOD1	0.109	enzyme						1.85E-03	CCN1,CCN2
quinapril		chemical drug						1.85E-03	ADM,CCN2
taspoglutide		biologic drug						1.85E-03	CPT1A,FABP5
CREBBP	0.026	transcription regulator		0.152		0.094	-0.034	1.86E-03	AKAP12,CCN1,FDPS,HMGCS1,ITGA6,JUN,KLHL4,LDLR,MAF,MMP11,NDRG1,SDC4
cytokine		group		-1.408		0.114	-1.686	1.86E-03	CCN1,CLU,CRH,ITGA6,JUN,PLAT,VWF
LILRB1		transmembrane receptor						1.86E-03	ADM,MAF,TENT5C
selenomethylselenocysteine		chemical - endogenous mammalian						1.86E-03	CLU,JUN,TIMP3
RET		kinase						1.88E-03	CLU,CTSV,EDNRB,ITGA6,MAF,TIMP3
GCG		other	Activated	2.2		0.07	2.046	1.90E-03	CCN2,CPT1A,FASN,FDPS,Sik1
ABCA1	0.272	transporter		-0.429		-0.025	-0.383	1.93E-03	CPT1A,CYP51A1,DGAT2,LDLR
CREM	0.095	transcription regulator						1.93E-03	CYP51A1,HMGCS1,IDI1,LDLR,Marcks,MVK,Sik1
CEBPA		transcription regulator		-0.414		0.049	-0.558	1.98E-03	ACACA,AKAP12,CPT1A,DGAT2,EEF1A2,EXTL2,FASN,GAS1,JUN,NFATC2,SCD,STEAP4,TUBB2A
EDN1	-0.051	cytokine		-0.234		0.115	-0.551	2.02E-03	CCN1,CCN2,EDNRB,HEY1,JUN,PXN,TIMP3,VWF
ADRA1B	-0.103	g-protein coupled receptor						2.08E-03	CTSV,FABP5,JUN,Scd2
ADRA1D		g-protein coupled receptor						2.08E-03	CTSV,FABP5,JUN,Scd2
MYBL2	-0.127	transcription regulator						2.08E-03	CASP6,CLU,IGFBP5,UBE2C
n-3 fatty acids		chemical drug	Activated	2		-0.018	2.035	2.08E-03	FADS1,FADS2,FASN,SCD
9Z,11E-octadecadienoic acid		chemical - endogenous mammalian						2.13E-03	FADS1,FASN,LDLR
CL 316243		chemical drug						2.13E-03	ACACA,FASN,SCD
DL-fructose		chemical - endogenous mammalian						2.13E-03	ACACA,FASN,SCD
FGF4		growth factor						2.13E-03	HMGCS1,SCD,Scd2
FSHB		other						2.13E-03	CCN2,FABP5,PLAT
alvespimycin		chemical drug						2.13E-03	ACACA,FASN,SCD
GH1		growth factor		-0.794		0.027	-0.852	2.14E-03	CLU,FASN,JUN,LDLR,RAD23A,SLC13A1
AKT1	-0.047	kinase		0.641		0.062	0.521	2.16E-03	CLU,CTSV,FABP5,FASN,HMGCS1,IGFBP5,NFATC2,PROM1,SCD,UBE2C
USF1	-0.006	transcription regulator						2.24E-03	AKAP12,CPT1A,FASN,IGF2R,LDLR
TFE3	0.066	transcription regulator		0		0.117	-0.234	2.25E-03	Cox5b,FASN,INSIG1,SCD
10E,12Z-octadecadienoic acid		chemical - endogenous mammalian		-0.293		0.008	-0.314	2.31E-03	ACACA,CPT1A,DGAT2,FADS1,FASN,LDLR,SCD
L-triiodothyronine		chemical - endogenous mammalian		-0.542		0.058	-0.746	2.35E-03	ACOT2,ADM,BNIP3L,CCN2,CLU,CPT1A,ECE1,FASN,LDLR,NID1,PSAT1,SCD,Scd2
oleoyl-estrone		chemical drug						2.41E-03	ACACA,FASN,LDLR
IL2		cytokine		0.348		0.087	0.043	2.42E-03	CRH,FAM110A,FGF13,H1-2,IDI1,ITGA6,JUN,LDLR,MAF,NDRG1,NETO2,PECAM1,SPRED2,STAT5B,TFRC,TNFRSF9
VEGFA	0.138	growth factor		0.939		0.108	0.603	2.43E-03	CCN1,CCN2,CTSV,IGFBP5,NFATC2,PECAM1,PLAT,TAL1,TBC1D8,TNFRSF9
HMGCR	-0.084	enzyme						2.56E-03	CCN1,CCN2
Muscarinic cholinergic receptor		group						2.56E-03	CCN1,JUN
SERPINA3		other						2.56E-03	CCN2,LDLR
SLC22A1	0.226	transporter						2.56E-03	CPT1A,CPT2
jasplakinolide		chemical - endogenous non-mammalian						2.56E-03	CCN1,CCN2
miR-139-5p (miRNAs w/seed CUACAGU)		mature microrna						2.56E-03	MMP11,SHC1
penfluridol		chemical drug						2.56E-03	ITGA6,PXN
retroinverso ERG inhibitory peptide 1		chemical reagent						2.56E-03	NDRG1,PLAT
retroinverso ERG inhibitory peptide 2		chemical reagent						2.56E-03	NDRG1,PLAT
xestospongin C		chemical - endogenous non-mammalian						2.56E-03	CRH,MAF
KITLG	0.085	growth factor		0.283		0.115	0.056	2.60E-03	CCN2,CLU,DHCR24,EDNRB,FABP5,LDLR,SHC1,TAL1,VWF
ADRA1A		g-protein coupled receptor						2.61E-03	CTSV,FABP5,JUN,Scd2
EPHB4	0.079	kinase		1		0.093	0.814	2.61E-03	MYL7,Nes,STAT5B,TAL1
bicalutamide		chemical drug		-0.283		-0.081	-0.123	2.61E-03	CLU,DDIT4,PMEPA1,SHC1
triamcinolone acetonide		chemical drug		1.913		0.004	1.903	2.65E-03	ANGPTL4,DUSP10,GAS1,INSIG1,JUN,LDLR,SCD,VWF
ATF4	0.009	transcription regulator		-0.063		0.121	-0.353	2.66E-03	CPT1A,DDIT4,FASN,IGFBP5,JUN,NDRG1,PSAT1
NR1I2		ligand-dependent nuclear receptor		-1.883		0.034	-1.969	2.66E-03	CPT1A,FASN,HMGCS1,INSIG1,JUN,NAT8B,SCD
mono-(2-ethylhexyl)phthalate		chemical toxicant		0.378		0.126	0.044	2.66E-03	ANGPTL4,CPT2,DDIT4,DGAT2,FADS1,FASN,LDLR
COMMD1	-0.028	transporter						2.72E-03	BNIP3,DDIT4,TFRC
leukotriene B4		chemical - endogenous mammalian						2.72E-03	CRH,FASN,JUN
miR-155-5p (miRNAs w/seed UAAUGCU)		mature microrna		1.72		-0.144	2.095	2.75E-03	CCN1,CYP51A1,DNAJC19,FADS1,HSD17B12,LCLAT1,MAF
CDX1		transcription regulator	Activated	2		0.003	1.993	2.80E-03	CLU,HDC,HEPH,NTS
homocysteine		chemical - endogenous mammalian		-0.776		0.067	-0.924	2.91E-03	ANXA2,CLU,FDPS,IDI1,NDRG1
LMNA	-0.129	other						2.96E-03	CAMK1D,CCN2,DNAJC19,IGF2R,JUN,MYL7,Nes,SLN,TIMP3
E2F5	0.096	transcription regulator						3.05E-03	CASP6,DUSP10,VEGFB
HAND1		transcription regulator						3.05E-03	ACACA,CPT1A,HEY1
SUPT16H	0.023	transcription regulator						3.05E-03	H1-2,LOXL2,TNNI2
TAF4B	-0.163	transcription regulator						3.05E-03	CCN2,ITGA6,JUN
NFYA	0.08	transcription regulator						3.06E-03	FASN,JUN,SCD,Scd2,VWF
TFRC	0.752	transporter		-0.128		-0.104	0.098	3.06E-03	ANXA2,BNIP3,DDIT4,JUN,LY75
corticosterone		chemical - endogenous mammalian		1.327		0.012	1.301	3.10E-03	ACACA,CCN2,CRH,DDIT4,FASN,JUN
TP63		transcription regulator		1.241		0.063	1.028	3.20E-03	ADM,CCN1,CCN2,CPT2,CYGB,DDIT4,DKK3,DUSP10,FASN,FDPS,ITGA6,TIMP3,TUBB2B
chenodeoxycholic acid		chemical - endogenous mammalian		-1.199		0.04	-1.277	3.22E-03	CPT1A,FASN,FGB,FGG,LDLR
DNMT3A	0.038	enzyme		0.378		-0.034	0.469	3.24E-03	AKAP12,CASP6,ITPR3,NFATC2,SDC4,SHC1,SLN
FGF2		growth factor		0.375		0.075	0.146	3.26E-03	ADM,ANGPTL4,CCN1,CYGB,EDNRB,IGFBP5,JUN,Nes,PLAT,SCD,TIMP3,VWF
COL18A1	0.145	other		-1.387		-0.112	-1.139	3.38E-03	DDIT4,EDNRB,JUN,PECAM1,VWF
3,5-L-diiodothyronine		chemical - endogenous mammalian						3.39E-03	CPT1A,SCD
ACACA	-0.214	enzyme						3.39E-03	FASN,SCD
ANGPTL8		other						3.39E-03	ACACA,SCD
CHCHD5	-0.055	other						3.39E-03	ACACA,FASN
FBXL5	0.033	enzyme						3.39E-03	Mt2,TFRC
HINT1	-0.039	enzyme						3.39E-03	FADS1,FADS2
SLC39A14	0.049	transporter						3.39E-03	FASN,SCD
THRSP		other						3.39E-03	ACACA,FASN
chlorpyrifos		chemical toxicant						3.39E-03	CRH,NTS
meldonium		chemical drug						3.39E-03	CPT1A,LDLR
uridine		chemical - endogenous mammalian						3.39E-03	Acot1,BDH1
ziprasidone		chemical drug						3.39E-03	CRH,HMGCS1
BCAP31	-0.048	transporter						3.40E-03	ACACA,INSIG1,SCD
fluticasone propionate		chemical drug		1.134		0.005	1.12	3.57E-03	ADM,ANGPTL4,DDIT4,SDC4,SLC16A6,TIMP3,VWF
CEBPB		transcription regulator		1.004		0.094	0.695	3.58E-03	ADM,CDT1,CPT1A,CRH,DGAT2,GAS1,HDC,JUN,LDLR,MMP11,NFATC2,SCD
SIRT3	0.027	enzyme		0.656		-0.048	0.749	3.67E-03	mt-Atp8,PECAM1,SCD,TFRC
6-hydroxydopamine		chemical toxicant		0.447		0.073	0.284	3.71E-03	BNIP3L,CRH,DDIT4,HEPH,JUN
miR-335-3p (miRNAs w/seed UUUUCAU)		mature microrna						3.77E-03	COL4A5,LOXL2,NID1
GW9662		chemical reagent		0.179		-0.048	0.285	3.89E-03	ACACA,ANGPTL4,CCN2,FASN,INSIG1
cycloheximide		chemical reagent		-1.114		-0.018	-1.061	3.94E-03	ADM,CCN1,CCN2,DDIT4,IGFBP5,JUN,KLF3,MMP11,PLAT,PXN,SCD
MYB		transcription regulator		1.473		0.057	1.348	4.05E-03	ADM,CASP6,IGFBP5,JUN,MMP11,SDC4,TNFRSF9
NR1H3	0.307	ligand-dependent nuclear receptor	Inhibited	-2.022		0.021	-2.075	4.15E-03	ACACA,FASN,FDPS,LDLR,Mt2,SCD,TNFRSF9,UBE2C
GW 4064		chemical toxicant		-0.958		0.069	-1.096	4.16E-03	ACACA,FGB,FGG,SLC13A1
SIRT6	-0.057	enzyme						4.16E-03	FASN,IGF2R,MAPK3,SCD
NFIL3	-0.086	transcription regulator						4.17E-03	ACACA,FASN,SCD
carbenoxolone		chemical toxicant						4.17E-03	ACACA,CCN2,FASN
gefitinib		chemical drug						4.18E-03	CTNNAL1,ECT2,FGF18,IGFBP5,MMP11,SPRED2,TIMP3
ATN1	-0.01	transcription regulator						4.20E-03	ARHGEF28,IGFBP5,Marcks,NFIC,Sik1,VAMP1
miR-125b-5p (and other miRNAs w/seed CCCUGAG)		mature microrna		-0.179		-0.144	0.139	4.27E-03	ARID3A,CASP6,JUN,PROM1,SCD
EP300	-0.027	transcription regulator						4.30E-03	AKAP12,CPT1A,CPT2,FASN,ITGA6,JUN,KLHL4,MAF,MMP11,NDRG1,SDC4,UBE2C
11-dehydrocorticosterone		chemical - endogenous mammalian						4.33E-03	ACACA,FASN
GUSB	0.083	enzyme						4.33E-03	CCN1,CTSV
Mup1 (includes others)		other						4.33E-03	FASN,SCD
UGT2B15		enzyme						4.33E-03	RAD23A,SLC16A6
UGT2B17		enzyme						4.33E-03	RAD23A,SLC16A6
tetrachlorodibenzodioxin		chemical toxicant		0.522		0.013	0.489	4.35E-03	ACOT2,ADM,BMP10,CCN1,COL4A5,CTSV,HSPA2,INPP5A,JUN,Pcp4l1,STEAP4
pravastatin		chemical drug						4.43E-03	LDLR,SDC4,VWF,Xlr3c (includes others)
TCF7L2	-0.167	transcription regulator		0		0.127	-0.358	4.45E-03	CCN2,CTNNAL1,CYP51A1,DHCR24,HSPA2,KLHL4,KMT5A,LBH,LPAR3,PLAT
LLGL2	0.139	other						4.60E-03	CCN1,CCN2,NDRG1
SIAH2	0.104	transcription regulator						4.60E-03	DHCR24,NDRG1,PMEPA1
ramipril		chemical drug						4.60E-03	CCN2,COL4A5,CRH
Mek		group		-0.003		0.049	-0.126	4.61E-03	CCN2,CLU,FASN,ITGA6,JUN,MAF,SLC16A6,SPRED2
HGF		growth factor		0.296		0.1	-0.029	4.66E-03	AKAP12,ANGPTL4,CCN1,CCN2,INSIG1,ITGA6,ITPR3,KIF20B,LDLR,LY75,TBC1D8,TIMP3,UBE2C
2-(4-amino-1-isopropyl-1H-pyrazolo[3,4-d]pyrimidin-3-yl)-1H-indol-5-ol		chemical reagent		1.091		-0.015	1.131	4.71E-03	CCN2,CPT1A,DDIT4,DHCR24,H1-2,PMEPA1,SDC4
MRTFA	0.021	transcription regulator						4.71E-03	CCN1,CCN2,DHCR24,FADS2,ITGA6,RHOBTB1,TAL1
VHL	0.035	transcription regulator						4.84E-03	BNIP3,CCN2,CPT2,LOXL2,MAF,TFRC
metformin		chemical drug		0.692		-0.024	0.745	4.85E-03	ACACA,CCN2,DDIT4,FASN,INSIG1,ITGA6,VWF
NCOR1	0.007	transcription regulator						4.88E-03	CRH,DHCR24,FASN,NDRG1,PMEPA1
FGFR4		kinase						5.05E-03	ACACA,DGAT2,FASN
NGFR	-0.102	transmembrane receptor						5.05E-03	JUN,LDLR,PLAT
thyroid hormone		chemical - endogenous mammalian						5.15E-03	CPT1A,ECH1,FASN,FDPS,KLF3,MAPK3,STAT5B
FBXW7	0.026	enzyme		0.152		-0.123	0.396	5.29E-03	DGAT2,HEY1,JUN,LDLR
cyclosporin A		biologic drug		-0.543		-0.043	-0.396	5.31E-03	ANXA2,CCN2,CLU,DDIT4,EDNRB,FASN,FGB,JUN,LDLR,MAF,PRKCH,SCD
Z-LLL-CHO		chemical - protease inhibitor		0.65		0.075	0.419	5.35E-03	CCN2,CDT1,CLU,FASN,ITPR3,JUN,MMP11,PXN,RANGAP1,YBX3
streptozocin		chemical drug		0.618		0.029	0.548	5.37E-03	ACACA,CCN2,CLU,CPT1A,CPT2,FASN,SCD,SLC25A20
ANGPTL3		growth factor						5.37E-03	ACACA,SCD
GNA11	-0.038	enzyme						5.37E-03	CTSV,LMCD1
Irp		group						5.37E-03	HEPH,TFRC
MLH1	-0.091	enzyme						5.37E-03	BNIP3,CLU
PCBP2	0.104	other						5.37E-03	CCN1,CCN2
RANBP9	-0.029	other						5.37E-03	JUN,PXN
Sik1	0.48	kinase						5.37E-03	ACACA,FASN
TEAD		group						5.37E-03	CCN1,CCN2
SOX4	0.004	transcription regulator		0.478		0.09	0.24	5.45E-03	Acot1,FGF13,MMP11,PECAM1,PPM1F,TENM4,TUBB2B
geldanamycin		chemical - endogenous non-mammalian	Activated	2.137		-0.041	2.251	5.49E-03	AARSD1,ACACA,AGO1,ANXA2,CLU,FASN,IGF2R,JUN,LBH
ALDH1A2	-0.019	enzyme						5.53E-03	CCN1,CCN2,TIMP3
ITCH	0.008	enzyme						5.53E-03	CCN1,CCN2,TFRC
PRKCZ	0.072	kinase						5.53E-03	JUN,MAPK3,PSAT1
ROR1	0.099	kinase						5.53E-03	CCN1,CCN2,NDRG1
Stat3-Stat3		complex						5.53E-03	FGB,FGG,JUN
deferasirox		chemical drug						5.53E-03	ANXA2,JUN,LY75
Fcer1		complex						5.60E-03	IL33,JUN,NFATC2,TNFRSF9
NRIP1	0.02	transcription regulator	Inhibited	-2		-0.073	-1.853	5.60E-03	ACACA,FASN,SCD,SLC25A20
OSMR	-0.001	transmembrane receptor						5.60E-03	FASN,FGB,Mt2,SCD
IKBKB	0.097	kinase	Activated	2.63		0.088	2.398	5.74E-03	CCN2,CLU,CTSF,ECT2,FASN,Mt2,NID1,TIMP3,TNFRSF9
STK11	-0.115	kinase		-1.414		0.037	-1.52	5.74E-03	ALDH9A1,Cox5b,FGG,IGFBP5,IL33,NDUFA11,NDUFS8,PSAT1,SLC16A4
estrogen		chemical drug		-0.117		0.094	-0.37	5.74E-03	CCN1,CCN2,CLU,CRH,IGFBP5,JUN,LDLR,NTS,PLAT
VDR	0.596	transcription regulator		-0.164		0.036	-0.266	5.79E-03	ACACA,CDT1,CPT2,FGG,IGFBP5,JUN,LBH,LDLR
PRKCD	-0.006	kinase		0.97		0.068	0.804	5.93E-03	BNIP3,ITPR3,JUN,LBH,LDLR,PROM1,TUBB2A
CDK4	0.059	kinase						5.94E-03	CIP2A,GALNT11,GAS2L3,KIF20B,SPC25,ZNF367
N-cor		group	Activated	2.216		-0.119	2.478	6.02E-03	ACACA,FADS2,FASN,SCD,Scd2
RXRG		ligand-dependent nuclear receptor						6.03E-03	FABP5,MMP11,TIMP3
SOST	0.057	other						6.03E-03	ACACA,CPT1A,FASN
SSRP1	0.053	transcription regulator						6.03E-03	H1-2,LOXL2,TNNI2
TIMP1	-0.171	cytokine						6.03E-03	IL33,PLAT,TIMP3
miR-221-3p (and other miRNAs w/seed GCUACAU)		mature microrna						6.03E-03	BNIP3L,DDIT4,TIMP3
MAPK14	0.04	kinase	Activated	2.607		0.083	2.39	6.10E-03	CYP51A1,FASN,FDPS,JUN,LDLR,PECAM1,SHC1
CD3		complex		0.676		0.106	0.285	6.23E-03	CASP6,EEF1A2,FDPS,IGFBP5,JUN,MAF,MSLN,NAGA,NFATC2,ORAI3,PCYT2,SHC1,TFRC,TNFRSF9,UBE2L6
Nfat (family)		group		-0.447		0.128	-0.734	6.27E-03	CCN1,DKK3,FGF18,LBH,SDC4
TAZ	0.043	enzyme		-1.479		0.093	-1.68	6.27E-03	CCN1,CCN2,LDLR,LOXL2,VEGFB
ciprofibrate		chemical drug		0.946		-0.006	0.96	6.34E-03	ACOT2,ANXA2,CTSV,FGB,SCD,SELENBP1
hydrocortisone		chemical - endogenous mammalian		-0.218		0.027	-0.283	6.34E-03	ADM,CCN2,CRH,IGF2R,IGFBP5,LY75
FSH		complex		-0.344		0.042	-0.433	6.43E-03	ADM,AKAP12,BNIP3L,CCN2,CTSV,JUN,LDLR,PLAT,RANGAP1,TFRC,YBX3
2,2-bis(4-hydroxyphenyl)-1,1,1-trichloroethane		chemical - endogenous mammalian						6.52E-03	CLU,IGFBP5
NRBP2		kinase						6.52E-03	ANXA2,PROM1
SART1	0.056	other						6.52E-03	DDIT4,PROM1
hesperetin		chemical drug						6.52E-03	DHCR24,LDLR
sphingomyelin		chemical - endogenous mammalian						6.52E-03	FASN,SCD
EPO		cytokine		0.562		0.07	0.408	6.54E-03	BNIP3L,CRH,DHCR24,FABP5,JUN,LDLR,TAL1,TFRC,VWF
CDC42		enzyme						6.56E-03	CCN2,JUN,UBE2C
Calcineurin A		group						6.56E-03	CCN2,FGF18,JUN
KIN001-043		chemical - kinase inhibitor						6.56E-03	Nes,PECAM1,SALL1
miR-338-3p (miRNAs w/seed CCAGCAU)		mature microrna						6.56E-03	COL4A5,LOXL2,NID1
Ngf		group		0.756		0.095	0.576	6.60E-03	ANXA2,CLU,JUN,MAP1A
MAP2K1	-0.016	kinase						6.63E-03	CCN1,CCN2,FASN,HDC,JUN,LDLR,PECAM1
SIRT1	0.001	transcription regulator		1.631		-0.052	1.777	6.90E-03	BNIP3,CPT1A,CRH,FASN,GRIP1,LDLR,MVK,Scd2,TAL1,TBC1D8,TIMP3
GHRL		growth factor		-1.951		0.032	-2.012	6.95E-03	ACACA,CPT1A,FASN,SCD
CCN2	-0.743	growth factor		-0.669		0.075	-0.83	7.07E-03	CCN2,FLNB,JUN,SDC4,TIMP3
APOB	-2.179	transporter						7.12E-03	ACACA,FASN,SCD
SU6656		chemical toxicant						7.12E-03	ADM,CCN2,Mt2
F3	0.143	transmembrane receptor		-1.091		0.144	-1.374	7.32E-03	CCN1,CCN2,FGF13,MSLN
lactacystin		chemical - protease inhibitor		0.378		0.059	0.222	7.58E-03	IGFBP5,LDLR,MMP11,PXN,RANGAP1,SNTB2,TUBB2A
thapsigargin		chemical toxicant		-0.114		0.078	-0.301	7.58E-03	CLU,CPT1A,DDIT4,HDC,INSIG1,JUN,LBH
propylthiouracil		chemical drug						7.64E-03	FADS1,FADS2,ITGA6,JUN,PROM1
H89		chemical - kinase inhibitor		-0.765		-0.104	-0.515	7.68E-03	CRH,IGFBP5,ITPR3,NFATC2,NTS,SHC1
CASP1		peptidase						7.70E-03	ACACA,FASN,SCD
amiodarone		chemical drug						7.70E-03	FADS2,LDLR,SCD
CDON	0.064	other						7.77E-03	CCN2,TIMP3
MTORC2		complex						7.77E-03	ACACA,FASN
Ncoa6	-0.056	transcription regulator						7.77E-03	FASN,SCD
clobetasol propionate		chemical drug						7.77E-03	FABP5,LY75
miR-375-3p (miRNAs w/seed UUGUUCG)		mature microrna						7.77E-03	C1QBP,CIP2A
ulipristal acetate		chemical drug						7.77E-03	ADM,VEGFB
NR1I3	0.168	ligand-dependent nuclear receptor		0.277		0.12	0.011	7.93E-03	FASN,IGF2R,INSIG1,SCD,STEAP4
SOX2		transcription regulator		-0.201		0.041	-0.334	8.01E-03	CCN2,CTNNAL1,DKK3,HEY1,JUN,LMCD1,Nes,PECAM1,PRKCH,PROM1,PSAT1,TIMP3
methylselenic acid		chemical reagent						8.06E-03	CLU,DHCR24,DUSP10,JUN,KIF20B,MAPK3,NDRG1,SCD
2-deoxyglucose		chemical drug		0.009		-0.007	0.022	8.10E-03	ACACA,CRH,DDIT4,JUN
Nr1h		group		-1.751		-0.047	-1.637	8.16E-03	ACACA,CPT2,ECE1,FASN,SCD,TIMP3
Sos		group						8.20E-03	ARID3A,IGFBP5,ITGA6,Mt2,NSDHL,PMEPA1,SCD
U0126		chemical - kinase inhibitor		0.029		-0.097	0.324	8.29E-03	ANGPTL4,CCN2,DUSP10,EDNRB,IDI1,ITGA6,JUN,LDLR,MAPK3,NETO2,PECAM1,SLC25A20,TIMP3
GNRH		group						8.31E-03	IGFBP5,JUN,MAPK3
HDL-cholesterol		complex						8.31E-03	CYP51A1,HMGCS1,IDI1
PIAS1	-0.009	transcription regulator						8.31E-03	ACACA,FASN,SCD
diethylnitrosamine		chemical toxicant						8.55E-03	JUN,Mt2,PECAM1,PROM1,SELENBP1
CSF1	0.002	cytokine	Inhibited	-2.813		0.095	-3.081	8.62E-03	CYP51A1,DHCR24,FDPS,HMGCS1,IDI1,JUN,MVK,NSDHL
GATA4	-0.056	transcription regulator		0.218		0.038	0.145	8.63E-03	ACACA,CCN2,CORIN,JUN,MYL7,NFATC2,TAL1
wortmannin		chemical - kinase inhibitor		0.479		-0.074	0.672	8.63E-03	ACACA,CCN2,FASN,JUN,MAF,PXN,TFRC
PI3K (family)		group		1.342		0.072	1.181	8.87E-03	ADM,DDIT4,FASN,ITGA6,PXN
LGALS1	0.048	other		1.114		0.083	0.953	8.94E-03	EXTL2,INSIG1,MAF,TFRC
CASZ1	-0.201	enzyme						8.95E-03	FGF18,Sik1,TNNI2
GDF9		growth factor						8.95E-03	CCN2,ITGA6,PXN
S-adenosylmethionine		chemical - endogenous mammalian						8.95E-03	ACACA,FASN,MAF
mevalonic acid		chemical - endogenous mammalian						8.95E-03	FASN,LDLR,PLAT
ANGPTL4	0.62	other						9.11E-03	DGAT2,FASN
CAMKK2	0.057	kinase						9.11E-03	ACACA,FASN
CHRM1		g-protein coupled receptor						9.11E-03	CCN1,JUN
CYP51A1	-0.359	enzyme						9.11E-03	DHCR24,NSDHL
FABP2		transporter						9.11E-03	CPT1A,FASN
FRS2	0.083	other						9.11E-03	ITGA6,PROM1
gamma-linolenic acid		chemical - endogenous mammalian						9.11E-03	FASN,PLIN5
mir-373		microrna						9.11E-03	ANGPTL4,CSDC2
sorbitol		chemical - endogenous mammalian						9.11E-03	CCN1,CCN2
L-glutamic acid		chemical - endogenous mammalian	Inhibited	-2.19		0.074	-2.352	9.19E-03	FADS1,FADS2,FASN,JUN,Scd2
Calcineurin protein(s)		complex		0		0.083	-0.166	9.37E-03	CTSV,CYGB,FGF18,NFATC2
RORC	0.094	ligand-dependent nuclear receptor						9.47E-03	ACOT2,DHCR24,Mt2,NSDHL,Scd2,SELENBP1
NSUN6	-0.109	enzyme						9.61E-03	CCN1,CCN2,NDRG1
pregnenolone carbonitrile		chemical drug						9.61E-03	CPT1A,INSIG1,SCD
Brd4	-0.152	kinase	Activated	2		0.126	1.748	9.82E-03	COL4A5,EDNRB,LOXL2,PLAT
TGFB3	-0.11	growth factor		-1.387		0.105	-1.62	9.87E-03	CCN1,CCN2,JUN,SCD,TIMP3
TCF3	-0.069	transcription regulator		0.816		0.034	0.732	1.02E-02	CASP6,CIP2A,CTSV,ECT2,JUN,MAF,NIBAN3,RIPOR2,SPC25,TENT5C
IL17A		cytokine		0.322		0.099	0.087	1.03E-02	CCN1,CCN2,IL33,JUN,KLF3,PECAM1,STEAP4,VWF
Immunoglobulin		complex		-0.436		0.006	-0.453	1.03E-02	ACACA,ADM,DDIT4,EDNRB,FAM110A,FASN,FLNB,HEY1,IL33,MAF,NDUFS6,NDUFS8,SCD,TFRC,YBX3
NEUROG3		transcription regulator		0		0.14	-0.28	1.03E-02	ACACA,CTSV,FASN,IGF2R
ENG	0.026	transmembrane receptor						1.03E-02	CCN2,ITGA6,PECAM1
LG100268		chemical reagent						1.03E-02	LDLR,NDRG1,SCD
histone deacetylase		complex						1.03E-02	CCN1,CRH,PLAT
EGR2		transcription regulator		0.339		0.115	0.067	1.03E-02	BNIP3L,CYP51A1,DDN,JUN,SCD,TFRC
COL6A1	0.038	other						1.06E-02	FASN,TNNI2
DGAT1	0.034	enzyme						1.06E-02	CPT1A,DGAT2
F10		peptidase						1.06E-02	CCN1,CCN2
HOXA4		transcription regulator						1.06E-02	CCN1,CCN2
MGAT3	0.232	enzyme						1.06E-02	HEY1,PROM1
RGCC	-0.035	other						1.06E-02	FASN,SCD
anti-benzo(a)pyrene-diol-epoxide		chemical toxicant						1.06E-02	BNIP3,JUN
ginsenoside Rb1		chemical - endogenous non-mammalian						1.06E-02	FASN,SCD
nickel chloride		chemical toxicant						1.06E-02	JUN,NDRG1
octanoic acid		chemical - endogenous mammalian						1.06E-02	DGAT2,FASN
RAC1	-0.028	enzyme		-1.179		0.101	-1.375	1.06E-02	CCN2,IL33,ITGA6,JUN,SHC1
VCAN	-0.105	other		-1.633		0.015	-1.67	1.06E-02	ADM,ANGPTL4,CLU,FABP5,MSLN,YBX3
FAS	-0.085	transmembrane receptor						1.07E-02	ANXA2,CCN2,DUSP10,JUN,LDLR,LY75,PECAM1,SHC1,SNTB2,TFRC
ZNF217	0.078	transcription regulator	Inhibited	-2		-0.113	-1.773	1.08E-02	ADM,KLHL4,PLAT,ZNF367
CHUK	0.041	kinase		1.195		0.117	0.888	1.08E-02	CLU,CTSF,HEY1,Mt2,NID1,TIMP3,VEGFB
MAP4K4	0.011	kinase	Activated	2.213		-0.134	2.51	1.10E-02	ACACA,FASN,NDUFA11,NDUFS8,SCD
POSTN	0.028	other						1.10E-02	HEY1,LOXL2,VEGFB
T3-TR-RXR		complex						1.10E-02	ACACA,FASN,LDLR
sirolimus		chemical drug		0.816		-0.071	1.066	1.12E-02	ACACA,ADM,CCN2,DDIT4,FASN,IDI1,IGFBP5,JUN,MAF,NTS,PROM1,SCD,TUBB2A
CYP19A1		enzyme						1.13E-02	ACACA,FASN,JUN,PXN
LONP1	0.04	peptidase						1.13E-02	ANXA2,C1QBP,MRPS22,NDUFA11
(R)-PFI-2		chemical reagent						1.13E-02	CCN2
(des-Arg10,Leu9)-kallidin		chemical reagent						1.13E-02	CCN2
2,4-dichlorobenzamil		chemical reagent						1.13E-02	CCN2
2-methoxy-5-(2',3',4'-trimethoxyphenyl)-2,4,6-cycloheptatrien-1-one		chemical reagent						1.13E-02	JUN
3-aminoisobutanoate		chemical - endogenous mammalian						1.13E-02	CPT1A
ALG10	-0.117	enzyme						1.13E-02	PROM1
ALG5	0.014	enzyme						1.13E-02	PROM1
ALG6	-0.001	enzyme						1.13E-02	PROM1
ALG8	-0.107	enzyme						1.13E-02	PROM1
BORCS8-MEF2B		transcription regulator						1.13E-02	JUN
CHMP3	-0.022	other						1.13E-02	IGF2R
CKAP4	-0.011	other						1.13E-02	CCN2
CLTA	0.055	other						1.13E-02	LDLR
CLTB	0.02	other						1.13E-02	LDLR
CORT-108297		chemical reagent						1.13E-02	CRH
DOK3		other						1.13E-02	NFATC2
FANK1		transcription regulator						1.13E-02	JUN
G-Actin		group						1.13E-02	JUN
GPR87		g-protein coupled receptor						1.13E-02	PROM1
GYPA		other						1.13E-02	Gypa
HNRNPDL	-0.013	other						1.13E-02	Cox5b
IPO5	-0.092	transporter						1.13E-02	IL33
KRT3		other						1.13E-02	PECAM1
LSM10	0.282	other						1.13E-02	H1-2
MAP1B	0.068	other						1.13E-02	MAP1A
MGAT4C		enzyme						1.13E-02	PROM1
MOB4	0.03	other						1.13E-02	CCN2
MOGS	0.133	enzyme						1.13E-02	PROM1
Mannosidase2		group						1.13E-02	PROM1
NEB	-0.095	other						1.13E-02	SLN
NSC117079		chemical reagent						1.13E-02	FGF18
OTP		transcription regulator						1.13E-02	CRH
PF-4523655		biologic drug						1.13E-02	DDIT4
PISD	-0.043	enzyme						1.13E-02	PCYT2
POU5F2	-0.321	transcription regulator						1.13E-02	CRH
Pde1		group						1.13E-02	CRH
R333		chemical drug						1.13E-02	MAF
RAB9A	-0.038	enzyme						1.13E-02	IGF2R
RNF7	0.009	enzyme						1.13E-02	JUN
SLC25A10	-0.145	transporter						1.13E-02	ACACA
alcuronium		chemical drug						1.13E-02	CHRM2
anti-miR-221 inhibitor		chemical reagent						1.13E-02	CCN2
anti-miR-222 inhibitor		chemical reagent						1.13E-02	CCN2
anti-miR-29a inhibitor		chemical reagent						1.13E-02	TIMP3
berberrubine		chemical - endogenous non-mammalian						1.13E-02	LDLR
beta-tocopherol		chemical - endogenous mammalian						1.13E-02	CCN2
columbamine		chemical - endogenous non-mammalian						1.13E-02	LDLR
daclizumab		biologic drug						1.13E-02	MAF
darifenacin		chemical drug						1.13E-02	CHRM2
direct black 38		chemical reagent						1.13E-02	TFRC
gallamine triethiodide		chemical drug						1.13E-02	CHRM2
impromidine		chemical drug						1.13E-02	LDLR
miR-502-5p (and other miRNAs w/seed UCCUUGC)		mature microrna						1.13E-02	KMT5A
miR-657 (miRNAs w/seed GCAGGUU)		mature microrna						1.13E-02	IGF2R
miR-6762-5p (and other miRNAs w/seed GGGGCCA)		mature microrna						1.13E-02	USP22
miR-6825-5p (and other miRNAs w/seed GGGGAGG)		mature microrna						1.13E-02	USP22
miR-6886-3p (miRNAs w/seed GCCCUUC)		mature microrna						1.13E-02	USP22
mir-340		microrna						1.13E-02	PLAT
mirin		chemical reagent						1.13E-02	IL33
mubritinib		chemical drug						1.13E-02	MAF
podophyllotoxin		chemical drug						1.13E-02	CCN2
ponatinib		chemical drug						1.13E-02	DHCR24
proadifen		chemical reagent						1.13E-02	PLAT
ralaniten		chemical reagent						1.13E-02	UBE2C
remoxipride		chemical drug						1.13E-02	NTS
rhapontin		chemical - endogenous non-mammalian						1.13E-02	FASN
TWIST1	-0.025	transcription regulator		0.816		0.051	0.691	1.15E-02	CLU,DKK3,IGFBP5,PROM1,PXDN,TIMP3
doxorubicin		chemical drug		0.383		0.048	0.226	1.17E-02	ADM,ANXA2,BNIP3L,CCN1,CCN2,CLU,FGB,JUN,KMT5A,NDRG1,PMEPA1
ATF1	-0.006	transcription regulator						1.18E-02	CYP51A1,JUN,NTS
HRH3		g-protein coupled receptor						1.18E-02	Acot1,ACOT2,Xlr3c (includes others)
PCGEM1		other						1.18E-02	ACACA,DHCR24,FASN
PEBP1	0.019	other						1.18E-02	ACACA,FASN,SCD
SAHM1		chemical reagent						1.18E-02	BNIP3,DDIT4,RHOBTB1
phenacetin		chemical drug						1.18E-02	ANXA2,CLU,FGB
MAPT	-0.279	other						1.20E-02	C1QBP,FASN,JUN,MAP1A,MAPK3,NDUFS6,NDUFS8,Pcp4l1,TUBB2A,TUBB2B
ACE2		peptidase						1.21E-02	BNIP3,CCN2
BTC	-0.092	growth factor						1.21E-02	ACACA,FASN
EHHADH	0.163	enzyme						1.21E-02	ACOT2,FASN
miR-128-3p (and other miRNAs w/seed CACAGUG)		mature microrna						1.21E-02	AGO1,LDLR
mir-140		microrna						1.21E-02	BNIP3,LOXL2
Laminin (complex)		complex						1.26E-02	ITGA6,PXN,SDC4
lipid		chemical - endogenous mammalian						1.26E-02	CLU,FDPS,LDLR
verapamil		chemical drug						1.26E-02	ANXA2,JUN,LDLR
butyric acid		chemical - endogenous mammalian		-0.841		0.013	-0.878	1.27E-02	ANXA2,CLU,DHCR24,FASN,H1-2,ITPR3,NFATC2,PLAT,STAT5B,TIMP3,VEGFB
NKX2-3		transcription regulator		-1.906		0.003	-1.913	1.27E-02	ADM,ANGPTL4,HEY1,NETO2,PRSS12,PSAT1,UBE2L6
APOE	0.149	transporter						1.28E-02	CCN1,CCN2,CLU,CPT1A,CTSV,JUN,LDLR,PMEPA1,SDC4
HDAC5	-0.19	transcription regulator						1.28E-02	CPT1A,CPT2,JUN,SCD
NR1H4		ligand-dependent nuclear receptor		-0.555		-0.007	-0.54	1.29E-02	ACACA,CPT2,FABP5,FASN,FGB,SLC13A1
S100A9	0.095	other		0.128		0.046	0.017	1.29E-02	AKAP12,DDIT4,IL33,PRSS12,ROBO2,TNFRSF9
CLDN7		other		-0.391		0.002	-0.396	1.29E-02	ANXA3,CCN2,ITPR3,NETO2,UBE2L6
PRKCA	-0.096	kinase		-0.762		0.074	-0.909	1.29E-02	BNIP3L,CCN2,HEY1,INSIG1,JUN
SMARCA4	-0.056	transcription regulator		1.177		0.12	0.8	1.31E-02	BNIP3L,CCN2,FGG,FLNB,GPM6A,HEPH,HEY1,IGFBP5,JUN,LOXL2,PLAT,TAL1,TNFRSF9,TNNI2
PTH		other		0.621		0.092	0.444	1.32E-02	CCN2,IGFBP5,IL33,JUN,PXN,SDC4
benzo(a)pyrene		chemical toxicant		-0.447		0.063	-0.588	1.33E-02	CCN1,ECT2,FASN,JUN,MAF,Mt2,SELENBP1
LIPE	0.194	enzyme						1.34E-02	FASN,ITGA6,SCD,Scd2,SDC4
DLL4	0.221	other						1.34E-02	HEY1,MAF,PECAM1
SKIL	0.107	transcription regulator						1.34E-02	NETO2,RHOBTB1,SLC16A6
fulvestrant		chemical drug		1.969		-0.033	2.047	1.34E-02	CCN1,DDIT4,DHCR24,IGFBP5,JUN,LDLR,TFRC,UBE2C
Ige		complex		1.795		0.108	1.474	1.35E-02	FXYD6,HDC,HSD17B12,IL33,Marcks,PECAM1,SCD,TFRC,TNFRSF9
BHLHA15		transcription regulator						1.37E-02	CLU,ITPR3
HIF1AN	0.071	enzyme						1.37E-02	ADM,HEY1
OMA1	0.075	peptidase						1.37E-02	FASN,SCD
PCYT2	-0.28	enzyme						1.37E-02	FASN,SCD
SMURF2	0.097	enzyme						1.37E-02	CCN2,JUN
tributyltin		chemical reagent						1.38E-02	ANGPTL4,CCN2,Cox5b,DGAT2,IL33
NR3C1	0.015	ligand-dependent nuclear receptor		1.576		0.018	1.527	1.39E-02	ADM,ANGPTL4,BNIP3L,CASP6,CCN1,CRH,DDIT4,DGAT2,GAS1,HSD17B12,IL33,JUN,MAPK3,TIMP3,TNFRSF9
ZBTB17	-0.181	transcription regulator						1.39E-02	ECT2,JUN,LDLR,UBE2C
sodium chloride		chemical - endogenous mammalian		0		0.121	-0.243	1.39E-02	CCN2,CRH,DDIT4,VWF
CCND1	0.027	transcription regulator						1.40E-02	CIP2A,DHCR24,GALNT11,GAS2L3,KIF20B,PMEPA1,SELENBP1,SPC25,ZNF367
Collagen(s)		complex						1.42E-02	CCN1,PSAT1,PXN
TXNIP	0.162	other						1.42E-02	Acot1,DDIT4,FASN
FGF1	-0.053	growth factor		0.447		-0.026	0.505	1.42E-02	CCN1,CCN2,JUN,PMEPA1,TIMP3
RUNX3		transcription regulator		0.152		-0.098	0.347	1.42E-02	CCN1,CCN2,PXDN,RHOBTB1,VWF
STAT5a/b		group	Inhibited	-2		0.042	-2.084	1.42E-02	CLU,IDI1,MAF,NETO2,VWF
tanespimycin		chemical drug	Activated	2.236		-0.073	2.398	1.47E-02	ACACA,FASN,HMGCS1,JUN,SCD
MASTL	-0.093	kinase						1.51E-02	COPG2,SNTB2,TTC38
ONECUT1		transcription regulator						1.51E-02	BNIP3L,CYGB,CYP51A1,FABP5,FASN,KLF3,PPFIBP1,SCD
zinc		chemical drug		1		-0.017	1.034	1.51E-02	IDI1,SCD,SELENBP1,TFRC
NFkB (complex)		complex		1.518		0.122	1.121	1.52E-02	ADM,CCN1,CCN2,CLU,EDNRB,FABP5,FGG,JUN,KLF3,PECAM1,PXN,SDC4,TFRC,TNFRSF9
ALDH1A1	0.132	enzyme						1.54E-02	ACACA,FASN
TARBP2	-0.173	other						1.54E-02	MAF,TNNI2
ethidium		chemical drug						1.54E-02	CCN1,CCN2
p85 (pik3r)		group						1.54E-02	FASN,NDRG1
KLF11	0.033	transcription regulator						1.56E-02	CCN2,CPT2,PLAT,SLC25A20,TIMP3
FOXA2		transcription regulator		0.152		0.046	0.061	1.59E-02	CPT1A,DDIT4,FABP5,FGB,IGFBP5,IL33,SCD
SPHK1		kinase						1.60E-02	CCN2,IL33,JUN
YY1	0.065	transcription regulator		-0.152		-0.011	-0.132	1.60E-02	ARID3A,CLU,Cox5b,FDPS,IGFBP5,LDLR,VEGFB,VWF
mir-21		microrna		-0.341		-0.094	-0.082	1.60E-02	CLU,ECT2,Gvin1 (includes others),PECAM1,PLAT,TIMP3,TNFRSF9,UBE2L6
5-fluorouracil		chemical drug	Activated	2.377		-0.035	2.48	1.60E-02	ANXA2,BNIP3,BNIP3L,CLU,FDPS,JUN,NDUFS8,UBE2C,YBX3
miR-124-3p (and other miRNAs w/seed AAGGCAC)		mature microrna		1.153		-0.144	1.53	1.62E-02	ALDH9A1,CCN2,DHCR24,LDLR,NFIC,NID1,ZNF367
palmitic acid		chemical - endogenous mammalian		-1.812		0.057	-1.952	1.62E-02	ACACA,CCN2,DGAT2,FASN,FDPS,Mt2,SCD
TCF4	-0.053	transcription regulator		-1.195		0.042	-1.306	1.64E-02	ANGPTL4,BNIP3,CIP2A,IGFBP5,JUN,NIBAN3,RIPOR2,SPC25,TENT5C,TRAK1
HNRNPK	-0.001	transcription regulator						1.69E-02	CCN2,ITGA6,LDLR
lysophosphatidylinositol		chemical - endogenous mammalian						1.69E-02	CPT1A,IL33,INSIG1
omeprazole		chemical drug						1.69E-02	CCN2,HDC,ITGA6
ERBB4	0.009	kinase		-1		0.01	-1.02	1.70E-02	IGFBP5,JUN,NID1,TIMP3
haloperidol		chemical drug		-0.604		0.082	-0.764	1.70E-02	CRH,HMGCS1,LDLR,NTS
1-(carboxymethylthio)tetradecane		chemical drug						1.72E-02	CPT2,SCD
BARX2		transcription regulator						1.72E-02	FGF12,TIMP3
FDFT1	-0.255	enzyme						1.72E-02	FASN,FDPS
FMO3		enzyme						1.72E-02	FASN,SCD
FZD8	0.083	g-protein coupled receptor						1.72E-02	CCN2,IGFBP5
hemoglobin		complex						1.72E-02	ADM,TFRC
indirubin		chemical drug						1.72E-02	CCN1,JUN
lisinopril		biologic drug						1.72E-02	JUN,LDLR
KLF2	-0.248	transcription regulator						1.75E-02	ADM,CCN2,NDRG1,PECAM1,TFRC,VWF
TGFBR1	-0.005	kinase		-0.277		0.092	-0.457	1.76E-02	CCN2,GAS1,HEY1,NFATC2
mir-29		microrna		-1.98		-0.106	-1.77	1.76E-02	ANGPTL4,COL4A5,NID1,TIMP3
vancomycin		biologic drug		0.927		0.082	0.765	1.76E-02	ANXA2,CLU,FGB,SCD
ITGA5	0.019	transmembrane receptor						1.79E-02	GAS1,JUN,PXN
MAPK7	0.004	kinase						1.79E-02	JUN,PLAT,STEAP4
SCARB1	-0.123	transporter						1.79E-02	DDIT4,FASN,LDLR
4-hydroxytamoxifen		chemical drug		-0.666		0.074	-0.837	1.79E-02	CCN1,CCN2,CLU,DDIT4,JUN,PRKCH
ESRRA		ligand-dependent nuclear receptor		-1.342		0.127	-1.625	1.79E-02	CYP51A1,HMGCS1,IDI1,Scd2,SLC25A20,TCAP
HOXA10		transcription regulator		0.816		-0.045	0.927	1.79E-02	ADM,CTSV,IGFBP5,PROM1,SCD,Scd2
tert-butyl-hydroquinone		chemical reagent		-0.13		0.124	-0.372	1.83E-02	JUN,MAF,MAP1A,SNTB2
HDAC4	-0.145	transcription regulator						1.86E-02	ANGPTL4,FGF13,GPM6A,JUN,Pcp4l1
fish oils		chemical drug						1.88E-02	CPT1A,CRH,FASN
C2CD5	0.039	other						1.91E-02	CPT1A,TNFRSF9
CREBZF	0.011	transcription regulator						1.91E-02	FASN,INSIG1
G6PD	0.091	enzyme						1.91E-02	FASN,NMRAL1
PLIN1		other						1.91E-02	ACACA,FASN
RHOJ	-0.035	enzyme						1.91E-02	AKAP12,PLAT
Srebp		group						1.91E-02	FASN,LDLR
N-acetyl-L-cysteine		chemical drug		-0.956		-0.084	-0.734	1.91E-02	ADM,BNIP3,CCN1,CCN2,FASN,HDC,JUN
ionomycin		chemical reagent		0.577		0.107	0.319	1.97E-02	FGF18,ITPR3,LDLR,MAF,Sik1,STAT5B
ARNTL	0.066	transcription regulator						1.99E-02	ACACA,FASN,SCD
CD28		transmembrane receptor		0.647		0.09	0.396	2.02E-02	CASP6,FDPS,IGFBP5,JUN,MAF,MSLN,NFATC2,ORAI3,TFRC
sphingosine-1-phosphate		chemical - endogenous mammalian		-0.48		0.07	-0.617	2.04E-02	ANXA2,CCN2,JUN,VWF
PDX1		transcription regulator		-1.342		0.036	-1.422	2.06E-02	ANXA2,CPT2,ECH1,INSIG1,JUN,RHOBTB1
FOXM1	-0.118	transcription regulator		1.387		0.126	1.107	2.09E-02	CTNNAL1,JUN,Nes,PECAM1,PROM1
miR-30c-5p (and other miRNAs w/seed GUAAACA)		mature microrna		-0.585		-0.144	-0.265	2.09E-02	CCN2,COL4A5,JUN,LOXL2,NID1
CCN5		growth factor						2.09E-02	CCN2,JUN,SDC4
1-methyl-4-phenylpyridinium		chemical toxicant						2.11E-02	DDIT4,TFRC
MPZ		other						2.11E-02	HMGCS1,JUN
NONO	0.004	transcription regulator						2.11E-02	ACACA,FASN
finasteride		chemical drug						2.11E-02	CLU,CRH
Hbb-b1		transporter						2.11E-02	NDUFA11,NDUFS8,PECAM1,TFRC
decitabine		chemical drug	Activated	2.186		0.056	1.974	2.15E-02	AKAP12,ANGPTL4,ANXA2,BNIP3,CCN2,CLU,LDLR,MAF,NDRG1,PSAT1,PXDN,SHC1,STAT5B,TFRC,TIMP3,TNFRSF9
levodopa		chemical - endogenous mammalian		-0.535		0.016	-0.595	2.16E-02	CHRM2,Cox5b,DGAT2,ECE1,EDNRB,FAM114A1,FDPS,IGFBP5,INSC,PCYT2,ROBO2,SH3PXD2B,SHC1,VAMP1
gentamicin		chemical drug		0.378		0.035	0.284	2.16E-02	CLU,CTSV,JUN,MAF,PSAT1,TFRC,YBX3
camptothecin		chemical drug						2.17E-02	ANXA2,BNIP3L,DUSP10,INSIG1,JUN,LDLR,LY75,PECAM1,SDC4,SNTB2,STAT5B,TFRC,TUBB2A
KMT2A	0.066	transcription regulator		1		0.14	0.719	2.19E-02	DUSP10,PROM1,RSPO1,SLC16A6
SOCS3	0.176	phosphatase						2.19E-02	CRH,FASN,JUN,SCD
desmopressin		biologic drug		1.98		0.068	1.844	2.19E-02	ADM,CRH,PXN,VWF
CD3 group		group						2.20E-02	FASN,SCD,TFRC
SFRP1	0.239	transmembrane receptor						2.20E-02	ACACA,FASN,SCD
ERK		group		-1.23		0.092	-1.469	2.20E-02	CCN2,CLU,HEY1,JUN,LDLR,NDRG1,PECAM1
ERN1	0.172	kinase		-0.447		0.076	-0.616	2.20E-02	ACACA,DGAT2,FASN,JUN,SCD
quercetin		chemical drug		0.391		0.01	0.368	2.20E-02	CRH,ECH1,FASN,JUN,LDLR
5,6-epoxyeicosatrienoic acid		chemical - endogenous mammalian						2.24E-02	PLAT
ACPP		phosphatase						2.24E-02	SHC1
ATP1A1	0.048	transporter						2.24E-02	LDLR
B4GALNT2		enzyme						2.24E-02	VWF
CREB5	0.136	transcription regulator						2.24E-02	CRH
CRHBP		other						2.24E-02	CRH
CYP4A22-AS1		other						2.24E-02	TAL1
Chorf		other						2.24E-02	FASN
Cop9 Signalosome		complex						2.24E-02	JUN
DPP10-AS1		other						2.24E-02	TIMP3
DUSP2	0.224	phosphatase						2.24E-02	HDC
FRAT1		other						2.24E-02	JUN
HSD17B13		enzyme						2.24E-02	FASN
IL17RC	-0.078	transmembrane receptor						2.24E-02	STEAP4
IPO9	-0.045	transporter						2.24E-02	PXN
KCNAB2	-0.024	ion channel						2.24E-02	KCNA4
KLHL40	-0.159	other						2.24E-02	BNIP3
LY3039478		chemical drug						2.24E-02	PROM1
MARCHF2	0.122	enzyme						2.24E-02	TFRC
MARK4	-0.03	kinase						2.24E-02	CCN2
MDC1	-0.1	other						2.24E-02	CLU
MYL2	-0.099	other						2.24E-02	MYL7
N(6)-carboxymethyl-L-lysine		chemical - endogenous mammalian						2.24E-02	CCN2
N-methylscopolamine		chemical drug						2.24E-02	CHRM2
NMB		other						2.24E-02	JUN
NUBP1	-0.197	other						2.24E-02	TFRC
ORC		complex						2.24E-02	CDT1
PACS1	0.099	other						2.24E-02	IGF2R
Pde3		group						2.24E-02	CRH
RILP	-0.141	other						2.24E-02	IGF2R
Rab11		group						2.24E-02	ITGA6
SB 559457		chemical reagent						2.24E-02	DDIT4
SLC9A9	0.103	transporter						2.24E-02	TFRC
STK26	0.264	kinase						2.24E-02	CCN2
TAN 67		chemical reagent						2.24E-02	MAPK3
TJP1	0.045	other						2.24E-02	YBX3
TJP2	0.029	kinase						2.24E-02	YBX3
VANGL1	0.029	other						2.24E-02	JUN
VANGL2	0.106	other						2.24E-02	SDC4
VPS33B	0.023	transporter						2.24E-02	VWF
alirocumab		biologic drug						2.24E-02	LDLR
amsacrine		chemical drug						2.24E-02	JUN
clusterin antisense oligonucleotide		biologic drug						2.24E-02	CLU
enalaprilat		chemical - endogenous mammalian						2.24E-02	LDLR
fascaplysin		chemical - endogenous non-mammalian						2.24E-02	CPT1A
histidyl-proline diketopiperazine		chemical - endogenous mammalian						2.24E-02	FGB
loganin		chemical - endogenous non-mammalian						2.24E-02	CCN2
masitinib		chemical drug						2.24E-02	DHCR24
methoxamine		chemical drug						2.24E-02	CRH
miR-378a-5p (miRNAs w/seed UCCUGAC)		mature microrna						2.24E-02	TUSC2
pyridoxal		chemical - endogenous mammalian						2.24E-02	MAPK3
ristocetin		chemical toxicant						2.24E-02	VWF
silvestrol		chemical - endogenous non-mammalian						2.24E-02	JUN
BRD4		kinase		0		0.136	-0.298	2.26E-02	BDH1,FADS1,LOXL2,PLAT,SLC16A6
DSCAM		other		0		0.074	-0.147	2.27E-02	NEURL1B,PRKCH,ROBO2,TAL1
TAF4	-0.159	transcription regulator						2.27E-02	CARMIL1,CCN2,GAS1,ITGA6
okadaic acid		chemical toxicant		-0.152		0.043	-0.237	2.27E-02	BNIP3,CCN2,JUN,NDRG1
JAG1	0.189	growth factor						2.31E-02	DUSP10,HEY1,TIMP3
salirasib		chemical drug						2.31E-02	ADM,BNIP3,PLAT
Mir200		group						2.31E-02	JUN,LOXL2
SPZ1		transcription regulator						2.31E-02	MAPK3,PROM1
mangiferin		chemical - endogenous non-mammalian						2.31E-02	ACACA,DGAT2
Pka		complex		-0.229		0.071	-0.377	2.32E-02	CCN2,CYP51A1,JUN,LDLR,NTS
IFNG		cytokine		1.681		0.056	1.439	2.34E-02	Acot1,ADM,ANGPTL4,CASP6,CCN2,CTSV,ECE1,EDNRB,FABP5,FASN,FGF12,FGG,Gvin1 (includes others),HMGCS1,IDI1,ITGA6,JUN,MMP11,PECAM1,PROM1,SDC4,TFRC,TIMP3,UBE2C,UBE2L6
3-methylcholanthrene		chemical toxicant						2.42E-02	ADM,CCN1,Mt2
colchicine		chemical drug						2.42E-02	CCN2,CRH,JUN
PC-SPES		chemical drug						2.42E-02	CLU,SELENBP1,TUBB2A,UBE2C
olanzapine		chemical drug		-1		0.043	-1.086	2.42E-02	GRIP1,HMGCS1,LDLR,YBX3
ACOX1	0.094	enzyme		-0.447		-0.026	-0.388	2.45E-02	ACOT2,ANXA2,CTSV,FASN,SELENBP1
CYP27A1	0.123	enzyme						2.52E-02	ACACA,HMGCS1
EIF4G2	-0.046	translation regulator						2.52E-02	JUN,PLAT
EPCAM		other						2.52E-02	FABP5,JUN
ETS		group						2.52E-02	CRH,VWF
HFE	-0.016	transmembrane receptor						2.52E-02	HEPH,TFRC
MAP3K5	-0.116	kinase						2.52E-02	CCN2,JUN
OXT		other						2.52E-02	CRH,MYL7
cuprizone		chemical toxicant						2.52E-02	FDPS,HMGCS1
mezerein		chemical - endogenous non-mammalian						2.52E-02	INSIG1,SLC16A6
telmisartan		chemical drug						2.54E-02	CCN1,CCN2,CPT1A
cocaine		chemical drug	Activated	2.4		0.098	2.166	2.57E-02	Acot1,CPT1A,CPT2,JUN,NTS,Sik1
ETV5	-0.075	transcription regulator						2.59E-02	FASN,MAF,SCD,TIMP3
N-nitro-L-arginine methyl ester		chemical drug		-0.218		0.002	-0.221	2.59E-02	ADM,CCN2,INSIG1,LDLR
NFAT5	-0.063	transcription regulator						2.59E-02	DDIT4,HSPA2,PLAT,VWF
POMC		other						2.59E-02	CRH,JUN,LDLR,Sik1
CDX2		transcription regulator		1.964		0.056	1.854	2.65E-02	CLU,HEPH,JUN,NTS,TAL1
GNRH1		other						2.66E-02	IGFBP5,JUN,PLAT
S-nitroso-N-acetyl-DL-penicillamine		chemical reagent						2.66E-02	ADM,BNIP3,LDLR
hexachlorobenzene		chemical toxicant						2.66E-02	ANXA2,CLU,FGB
cigarette smoke		chemical toxicant		-0.2		0.082	-0.381	2.66E-02	ADM,CCN1,CHRM2,DDIT4,FABP5,JUN,VEGFB
Pdgf (complex)		complex		-1.228		0.083	-1.387	2.67E-02	HEY1,JUN,LDLR,TIMP3
prostaglandin E2		chemical - endogenous mammalian		1.436		0.048	1.307	2.71E-02	ANGPTL4,ANXA2,CASP6,CCN2,FASN,HDC,IGFBP5,JUN
HMGA1	-0.059	transcription regulator		0.447		0.043	0.351	2.71E-02	CCN1,IDI1,INSIG1,MVK,SDC4
BRD7	-0.023	transcription regulator						2.74E-02	FASN,NDRG1
JUN/JUNB/JUND		group						2.74E-02	CCN1,JUN
PDGF-DD		complex						2.74E-02	CLU,VEGFB
miR-18a-5p (and other miRNAs w/seed AAGGUGC)		mature microrna						2.74E-02	CCN2,FGG
mir-33		microrna						2.74E-02	ACACA,CPT1A
P38 MAPK		group		-0.329		0.116	-0.649	2.75E-02	BNIP3,BNIP3L,CCN2,EDNRB,IGFBP5,JUN,Nes,NFATC2,TIMP3
CEBPD	0.189	transcription regulator						2.76E-02	CLU,CRH,CTSV,IGFBP5
MKNK1	-0.015	kinase		1		0.144	0.712	2.76E-02	ANXA2,CCN1,FLNB,HSPA2
torin1		chemical reagent		1.067		-0.133	1.33	2.76E-02	ALDH9A1,FASN,NDUFS8,NTS
PTK2	0.01	kinase						2.78E-02	CCN1,LDLR,TIMP3
benzene		chemical toxicant						2.78E-02	BNIP3,DHCR24,ECE1
trichloroethylene		chemical toxicant						2.78E-02	BNIP3,DHCR24,ECE1
PTGER2		g-protein coupled receptor		0.152		0.097	-0.041	2.85E-02	ECT2,HDC,PXN,TIMP3
KLF5		transcription regulator						2.90E-02	CDT1,FAM110A,FGF18
ZAP70		kinase						2.90E-02	COL4A5,SCD,UBE2L6
IL15	-0.086	cytokine		1.146		0.086	0.922	2.95E-02	CCN2,CPT1A,JUN,MAF,MAPK3,MSLN,NAGA,TFRC,TNFRSF9,TNNI2
COL4A3	0.118	other						2.97E-02	CCN2,COL4A5
IPMK	0.12	kinase						2.97E-02	CCN1,JUN
JINK1/2		group						2.97E-02	FASN,SCD
LCAT		enzyme						2.97E-02	CLU,LDLR
MAP3K3	0.033	kinase						2.97E-02	JUN,STEAP4
NFAT (complex)		complex						2.97E-02	CYGB,IL33
Ni2+		chemical reagent						2.97E-02	ANGPTL4,NDRG1
bisindolylmaleimide iv		chemical - kinase inhibitor						2.97E-02	CCN2,PRKCH
paroxetine		chemical drug						2.97E-02	ADM,BNIP3
risperidone		chemical drug						2.97E-02	FADS2,NTS
DIO2	-0.129	enzyme		1		-0.011	1.021	2.99E-02	CARMIL1,DDIT4,NTS,SLN,Xlr3c (includes others)
IFNAR1	0.045	transmembrane receptor	Activated	2		0.088	1.823	2.99E-02	HMGCS1,IDI1,PLAT,RIPOR2,VEGFB
RBPJ	0.067	transcription regulator		1.964		-0.061	2.084	2.99E-02	ECT2,FGF13,FGF18,HEY1,JUN
puromycin aminonucleoside		chemical reagent		1.154		0.076	1.004	3.03E-02	ANXA2,CLU,CTSV,FGB
PTGES		enzyme						3.03E-02	ANXA2,CCN2,ITGA6
phenylbutazone		chemical drug						3.03E-02	ANXA2,CLU,FGB
1,2-dithiol-3-thione		chemical reagent		-0.106		0.107	-0.366	3.10E-02	BNIP3,EPB41,NAT8B,PSAT1,TFRC,Xlr3c (includes others)
KDM1A	0.052	enzyme		0.701		-0.029	0.771	3.10E-02	ADM,FASN,PROM1,PSAT1,SCD,ZNF367
INHA	-0.131	growth factor		-0.152		-0.003	-0.147	3.12E-02	CCN1,CCN2,COL4A5,CYP51A1
mir-10		microrna						3.12E-02	CCN1,HDC,MAF,PROM1
cyclic AMP		chemical - endogenous mammalian		1.132		0.092	0.893	3.18E-02	CCN2,CRH,IGFBP5,IL33,ITPR3,JUN,VWF
GW7647		chemical drug						3.21E-02	CPT1A,IGFBP5
HSD17B4	0.061	enzyme						3.21E-02	ACOT2,FASN
LRPAP1	0.025	other						3.21E-02	LDLR,MAPK3
SIRT2	0.069	transcription regulator						3.21E-02	IDI1,MVK
Smad		complex						3.21E-02	ANGPTL4,CCN2
dibutyl phthalate		chemical toxicant						3.21E-02	FGB,JUN
CD44	0.124	other						3.23E-02	CLU,FASN,JUN,PECAM1,PMEPA1,SDC4
RHO		g-protein coupled receptor						3.30E-02	EPB41,H1-2,NID1
(Ala9)-autocamtide-2		chemical - kinase inhibitor						3.35E-02	CRH
17alpha-hydroxyprogesterone caproate		chemical drug						3.35E-02	CRH
3,4-methylenedioxyamphetamine		chemical drug						3.35E-02	JUN
BR-4628		chemical reagent						3.35E-02	CCN2
BTG1	-0.061	transcription regulator						3.35E-02	JUN
C1QL1		other						3.35E-02	CRH
CDC20	-0.095	other						3.35E-02	UBE2C
CNDP2	-0.105	peptidase						3.35E-02	MMP11
CNPY2	0.131	other						3.35E-02	LDLR
CRYAA/CRYAA2		other						3.35E-02	CASP6
DDOST	0.023	enzyme						3.35E-02	PROM1
DLST	-0.037	enzyme						3.35E-02	JUN
DUB		group						3.35E-02	LDLR
Defb2		other						3.35E-02	TNFRSF9
EMP2	-0.027	other						3.35E-02	ITGA6
Eotaxin		group						3.35E-02	MAPK3
FTL	0.024	enzyme						3.35E-02	TFRC
FTMT		enzyme						3.35E-02	TFRC
GBP1		enzyme						3.35E-02	VWF
GLUD1	-0.033	enzyme						3.35E-02	MAPK3
GPC3	0.145	other						3.35E-02	LDLR
IRS		group						3.35E-02	DGAT2
KLHL2	0.15	other						3.35E-02	JUN
LIFR	-0.007	transmembrane receptor						3.35E-02	FGB
LSS	-0.138	enzyme						3.35E-02	LDLR
MAPK15		kinase						3.35E-02	JUN
MTCH2	0.023	other						3.35E-02	SHC1
MYLIP	0.134	enzyme						3.35E-02	LDLR
N(1)-guanyl-1,7-diaminoheptane		chemical reagent						3.35E-02	MVK
PARD6A	-0.044	other						3.35E-02	ECT2
PDCD5	-0.167	other						3.35E-02	NFATC2
PIGT	-0.136	enzyme						3.35E-02	PIGK
PRAG1	0.109	kinase						3.35E-02	HEY1
PRR7		other						3.35E-02	JUN
REG3G		other						3.35E-02	IL33
RING1	0.026	transcription regulator						3.35E-02	JUN
Rbpjl2		other						3.35E-02	HEY1
S100A2		other						3.35E-02	BNIP3
SLC3A2	-0.007	transporter						3.35E-02	CCN2
SPRED2	-0.3	cytokine						3.35E-02	CRH
STRAP	-0.049	other						3.35E-02	JUN
TOP2B	-0.014	enzyme						3.35E-02	FASN
TRAF7	0.067	enzyme						3.35E-02	JUN
TUBB1		other						3.35E-02	TUBB2A
UPP1	-0.114	enzyme						3.35E-02	Acot1
ZHX2	-0.083	transcription regulator						3.35E-02	HDC
apitolisib		chemical drug						3.35E-02	NDRG1
capivasertib		chemical drug						3.35E-02	PROM1
compound 48/80		chemical reagent						3.35E-02	LDLR
defibrotide		biologic drug						3.35E-02	PLAT
ergosterol-5,8-peroxide		chemical - endogenous mammalian						3.35E-02	CCN2
ethyl ether		chemical reagent						3.35E-02	CRH
miR-139-3p (miRNAs w/seed GGAGACG)		mature microrna						3.35E-02	MMP11
mir-329		microrna						3.35E-02	DDIT4
mir-497		microrna						3.35E-02	MAPK3
nickel subsulfide		chemical toxicant						3.35E-02	NDRG1
pirenzepine		chemical drug						3.35E-02	CHRM2
potassium channel		group						3.35E-02	JUN
sangivamycin		chemical - endogenous non-mammalian						3.35E-02	JUN
stavudine		chemical drug						3.35E-02	CPT1A
sulfurbutylether-beta-cyclodextrin		chemical reagent						3.35E-02	LDLR
thioguanine		chemical drug						3.35E-02	BNIP3
FN1	0.164	enzyme		0.447		0.084	0.26	3.36E-02	BNIP3L,CCN1,CCN2,DHCR24,PXN,SDC4
medroxyprogesterone acetate		chemical drug		1.706		-0.017	1.741	3.37E-02	CCN1,FASN,JUN,SCD,SPC25
GLI1		transcription regulator		1.091		0.119	0.857	3.42E-02	CLU,INSIG1,MMP11,SALL1,TIMP3,TNFRSF9
SIM1		transcription regulator		0.816		0.137	0.48	3.42E-02	ANGPTL4,CRH,Gypa,NFATC2,SELENBP1,TNFRSF9
IL6ST	0.069	transmembrane receptor						3.43E-02	FGB,JUN,MAF
PPP3R1	0.007	phosphatase						3.43E-02	ARID3A,SCD,Scd2
USF2	0.025	transcription regulator						3.43E-02	CPT1A,FASN,IGF2R
ADAMTS12	-0.075	peptidase						3.45E-02	HDC,IL33
K-252		chemical - kinase inhibitor						3.45E-02	JUN,NDRG1
KAT2A	0.033	enzyme						3.45E-02	BNIP3,JUN
PROX1	-0.032	transcription regulator						3.45E-02	HEY1,TNNI2
STS		enzyme						3.45E-02	ACACA,EEF1A2
arotinoid acid		chemical toxicant						3.45E-02	ALDH9A1,SCD
dasatinib		chemical drug						3.45E-02	CCN1,CCN2
diazoxide		chemical drug						3.45E-02	ACACA,FASN
linolenic acid		chemical - endogenous mammalian						3.45E-02	CLU,FASN
thyroid hormone receptor		group						3.45E-02	CPT1A,MMP11
SMAD3	-0.03	transcription regulator		-0.7		0.079	-0.871	3.47E-02	ARID3A,CCN2,CYP51A1,HEY1,JUN,PMEPA1,TIMP3
MECP2	-0.099	transcription regulator						3.53E-02	CAMK1D,CLU,CRH,ITGA6,PROM1
GnRH analog		biologic drug		-0.137		-0.006	-0.122	3.53E-02	ACACA,EDNRB,HSPA2,ITPR3,JUN,MAPK3,NDRG1,VEGFB
gentamicin C		chemical drug						3.57E-02	ANXA2,CLU,FGB
NR5A2	-0.102	ligand-dependent nuclear receptor		1.091		0.075	0.944	3.61E-02	FASN,FGB,JUN,LDLR
RAF1	-0.054	kinase		0.896		0.126	0.589	3.70E-02	AKAP12,HDC,JUN,PLAT,SELENBP1,TUBB2A
ATOH1		transcription regulator						3.70E-02	CRH,SALL1
TRIB3	0.391	kinase						3.70E-02	DDIT4,PSAT1
ceramide		chemical - endogenous mammalian						3.70E-02	JUN,NAT8B
p70 S6k		group						3.70E-02	FASN,SCD
NRG2		growth factor						3.72E-02	BNIP3,CCN1,CCN2
folic acid		chemical - endogenous mammalian						3.72E-02	CLU,JUN,PECAM1
lomustine		chemical drug						3.72E-02	ANXA2,CLU,FGB
ursodeoxycholic acid		chemical - endogenous mammalian						3.72E-02	CCN2,FASN,MAF
methylmercury		chemical toxicant						3.86E-02	BNIP3,DHCR24,ECE1
triamterene		chemical drug						3.86E-02	ANXA2,CLU,FGB
EIF4E	-0.061	translation regulator		0		0.144	-0.288	3.86E-02	BNIP3,CDT1,INSIG1,TUSC2,UBE2C
GNA15		enzyme						3.93E-02	ADM,AKAP12,PLAT,SELENBP1
KIT	0.032	transmembrane receptor						3.93E-02	EML1,Gypa,HDC,SHC1
PSMB11	-0.251	peptidase		0		-0.113	0.227	3.93E-02	CTSV,LY75,NID1,ROBO2
Pkc(s)		group		0.305		0.083	0.111	3.98E-02	ADM,CCN1,CCN2,CPT1A,JUN,MAPK3
Tcf7		transcription regulator		0.509		-0.006	0.523	3.98E-02	DHCR24,FDPS,LDLR,MAF,PECAM1,VEGFB
MAF	0.453	transcription regulator						4.01E-02	CYP51A1,IDI1,MAF
Rxr		group						4.03E-02	ANGPTL4,CPT1A,INSIG1,MMP11
Hdac		group		-0.094		-0.01	-0.073	4.12E-02	CRH,DKK3,EDNRB,JUN,ROBO2
melatonin		chemical - endogenous mammalian						4.14E-02	ACACA,ECE1,FASN,PLAT
KCNE3	0.199	ion channel						4.16E-02	EPN3,FABP5,Sik1
Pro-inflammatory Cytokine		group						4.16E-02	ADM,CLU,SDC4
calphostin C		chemical - kinase inhibitor						4.16E-02	CLU,ECE1,LDLR
miR-21-5p (and other miRNAs w/seed AGCUUAU)		mature microrna						4.16E-02	FGF18,PECAM1,TIMP3
GRP		growth factor						4.22E-02	IL33,JUN
calcimycin		chemical reagent		0.121		0.093	-0.059	4.26E-02	CRH,DDIT4,JUN,SHC1
dextran sulfate		chemical drug						4.28E-02	CCN2,IL33,NFATC2,PECAM1,SPC25,UBE2C,VEGFB
androgen		chemical drug						4.30E-02	CTSV,DHCR24,IGFBP5,JUN,SDC4
COLQ	-0.35	other						4.31E-02	NID1,SDC4,SNTB2
Raf		group						4.31E-02	JUN,SLC16A6,SPRED2
fenamic acid		chemical reagent						4.31E-02	ANXA2,CLU,FGB
13(S)-hydroxyoctadecadienoic acid		chemical - endogenous mammalian						4.44E-02	MAPK3
4-methylcatechol		chemical - endogenous mammalian						4.44E-02	JUN
ABI1	0.052	other						4.44E-02	PXN
ACSL3	-0.055	enzyme						4.44E-02	SCD
BOK	-0.275	other						4.44E-02	ITPR3
CFL1	0.012	other						4.44E-02	JUN
CMIP	0.108	other						4.44E-02	MAF
Co2+		chemical - endogenous mammalian						4.44E-02	NDRG1
DLL3		other						4.44E-02	HEY1
FDX2	-0.147	transporter						4.44E-02	TFRC
FDXR	0.076	enzyme						4.44E-02	TFRC
GCLC	-0.11	enzyme						4.44E-02	JUN
GIT1	-0.053	kinase						4.44E-02	PXN
GLRX3	0.005	enzyme						4.44E-02	TFRC
HSPBP1	-0.271	other						4.44E-02	HSPA2
ITPR		group						4.44E-02	MAPK3
MIR129		group						4.44E-02	MAPK3
MLK4B		other						4.44E-02	JUN
N-docosahexaenoylethanolamine		chemical - endogenous mammalian						4.44E-02	JUN
NBN	-0.037	other						4.44E-02	CLU
NT157		chemical reagent						4.44E-02	PECAM1
PF-4691502		chemical drug						4.44E-02	PROM1
PHLDA1	-0.308	other						4.44E-02	ITGA6
PLAGL2	0.113	transcription regulator						4.44E-02	BNIP3
RAB11FIP3	-0.151	other						4.44E-02	JUN
RNF139	0.009	enzyme						4.44E-02	FASN
SPRED1	-0.102	other						4.44E-02	CRH
TBX20	-0.029	transcription regulator						4.44E-02	BMP10
TIAM1	0.145	other						4.44E-02	JUN
TXLNG	-0.021	other						4.44E-02	SCD
bisindolylmaleimide II		chemical - kinase inhibitor						4.44E-02	JUN
cholesterol ester		chemical - endogenous mammalian						4.44E-02	LDLR
clomiphene		chemical drug						4.44E-02	LDLR
diamide		chemical reagent						4.44E-02	SDC4
ethyl linoleate		chemical - endogenous mammalian						4.44E-02	FADS2
firtecan pegol		chemical drug						4.44E-02	BNIP3
mianserin		chemical drug						4.44E-02	CRH
nitrendipine		chemical drug						4.44E-02	LDLR
proanthocyanidin derivative		chemical - other						4.44E-02	JUN
pyridostigmine		chemical drug						4.44E-02	CHRM2
trimetazidine		chemical drug						4.44E-02	CCN2
tylophorine		chemical drug						4.44E-02	JUN
NCOA4	0.116	transcription regulator						4.48E-02	CCN2,FABP5
PRKCI	0.109	kinase						4.48E-02	ECT2,FASN
PTX3	-0.08	other						4.48E-02	CCN2,JUN
leucine		chemical - endogenous mammalian						4.48E-02	ACACA,FASN
tosedostat		chemical drug						4.48E-02	DDIT4,PSAT1
CDKN1B	-0.034	kinase		-1		-0.105	-0.791	4.48E-02	CSDC2,EPB41,NFATC2,TENM4
Histone h3		group						4.55E-02	AKAP12,CRH,DUSP10,FASN,IGF2R,JUN,Nes,RSPO1,SCD,SLC16A6
SMARCB1	-0.027	transcription regulator						4.58E-02	BNIP3,BNIP3L,CDT1,HEY1,KLHL4
ID1	0.123	transcription regulator						4.63E-02	CCN2,PROM1,SCD
IL1		group		-1.596		0.093	-1.853	4.64E-02	ACACA,CPT1A,CRH,IL33,JUN,LDLR,NFATC2,SDC4
STAT5A	0.099	transcription regulator						4.70E-02	CASP6,FASN,H1-2,MAF,SELENBP1,STAT5B,TNFRSF9
NGF	-0.245	growth factor		-0.198		0.09	-0.383	4.76E-02	ADM,ANXA2,CRH,JUN,LDLR,SHC1
epigallocatechin-gallate		chemical drug		1.004		-0.049	1.109	4.76E-02	CASP6,CCN1,CCN2,JUN,LDLR,TFRC
ACKR3	0.073	g-protein coupled receptor						4.76E-02	ADM,VWF
DRD2		g-protein coupled receptor						4.76E-02	EDNRB,JUN
HISTONE		group						4.76E-02	DKK3,NFATC2
IFRD1	-0.008	other						4.76E-02	CCN2,DGAT2
Rhox5	-0.328	transcription regulator						4.76E-02	SCD,TFRC
TG	0.118	other						4.76E-02	ACACA,CPT1A
UPF2	0.067	other						4.76E-02	CLU,HEY1
Akt		group		0.152		0.046	0.062	4.77E-02	ADM,CCN2,CPT1A,FASN,JUN,NDRG1,SCD
EGFR	-0.063	kinase		-0.578		0.065	-0.763	4.78E-02	CCN2,FASN,HDC,IGFBP5,IL33,ITGA6,JUN,PLAT,PROM1
FGF7		growth factor						4.79E-02	FABP5,FASN,SCD
HIPK2	-0.148	kinase						4.79E-02	EPB41,Gypa,PECAM1
KDM3B	0.077	enzyme						4.79E-02	CCN2,FADS2,KIF26B
MEF2D	-0.118	transcription regulator						4.79E-02	CCN2,CDT1,JUN
silibinin		chemical drug						4.79E-02	CCN2,PECAM1,PROM1
MLXIPL	0.174	transcription regulator		-1.326		0.139	-1.597	4.84E-02	ACACA,CPT1A,FASN,SCD
salmonella minnesota R595 lipopolysaccharides		chemical - endogenous non-mammalian		0.068		0.144	-0.216	4.84E-02	EDNRB,JUN,Nes,SLFN13
ATG7	0.101	enzyme						4.96E-02	ACACA,CCN2,PECAM1
KDM8	-0.149	enzyme						4.96E-02	ACACA,DHCR24,FASN
PAX7		transcription regulator						4.96E-02	CAMK1D,Marcks,MSLN
TRAF3IP2	-0.145	other						4.96E-02	CCN2,IL33,STEAP4
phenylephrine		chemical drug						4.96E-02	BNIP3L,EDNRB,JUN
CSF3		cytokine		-0.749		0.04	-0.817	4.96E-02	FGB,HDC,JUN,TAL1,TFRC
GATA1		transcription regulator	Activated	2		0.056	1.889	4.99E-02	Gypa,ITGA6,PECAM1,RANGRF,TAL1,TFRC,VWF
TSC2	0.047	other		-1.982		-0.071	-1.841	6.13E-02	ANXA2,IGFBP5,NSDHL,SCD
IKBKG	0.078	kinase		1.982		0.103	1.778	7.13E-02	CLU,CTSF,Mt2,NID1
CST5		other	Inhibited	-2.425		-0.07	-2.256	9.46E-02	AGO1,AKAP12,ANXA2,ANXA3,EPN3,ITPR3
EGLN		group		-1.944		-0.139	-1.674	1.11E-01	ADM,BNIP3,NTS,SELENBP1
SATB1	0.043	transcription regulator		1.982		-0.024	2.031	1.21E-01	FAM110A,MAF,RIPOR2,UBE2L6
glucocorticoid		chemical drug	Inhibited	-2.087		-0.007	-2.073	1.24E-01	CCN2,CLU,CPT2,CRH,FASN,PLAT
trichostatin A		chemical drug	Activated	2.531		0.036	2.399	1.38E-01	AKAP12,CLU,FASN,HMGCS1,LDLR,MAF,MVK,NDRG1,Nes,PSAT1,SHC1,STAT5B,TIMP3,VWF
IL33	0.665	cytokine	Activated	2		0.103	1.793	1.46E-01	DGAT2,HDC,Marcks,PLAT,TNFRSF9
TLR3	-0.024	transmembrane receptor	Activated	2.191		0.125	1.916	1.77E-01	CLU,IL33,Marcks,NTS,PECAM1
RELA	-0.022	transcription regulator		1.941		0.096	1.755	3.78E-01	BNIP3L,CCN2,JUN,PECAM1,PXN,SDC4
