# Supplementary material for: Maternal diet-induced obesity during pregnancy alters lipid supply to mouse E18.5 fetuses and changes the cardiac tissue lipidome in a sex-dependent manner
Source: eLife. 2022 Jan 13;11:e69078. doi: 10.7554/eLife.69078 (PMC8794468; doi:10.7554/eLife.69078)
Supplement: Figure 5—source data 5. [file elife-69078-fig5-data5.csv]

Figure 5-source data 5
Figure 5E
Fetal cardiac mRNA levels by qPCR
Group	Sex	Target	Relative mRNA levels
Control	Male	Ppara	1.09
Control	Male	Ppara	1.36
Control	Male	Ppara	1.23
Control	Male	Ppara	1.16
Control	Male	Ppara	0.67
Control	Male	Ppara	1.17
Control	Male	Ppara	0.96
Control	Male	Ppara	0.6
Obese	Male	Ppara	2.18
Obese	Male	Ppara	1.69
Obese	Male	Ppara	2.17
Obese	Male	Ppara	2.32
Obese	Male	Ppara	5.03
Obese	Male	Ppara	3.69
Obese	Male	Ppara	3.87
Control	Female	Ppara	0.72
Control	Female	Ppara	1.02
Control	Female	Ppara	1.04
Control	Female	Ppara	0.56
Control	Female	Ppara	1.47
Control	Female	Ppara	1.4
Control	Female	Ppara	0.9
Control	Female	Ppara	1.22
Obese	Female	Ppara	1.46
Obese	Female	Ppara	3.06
Obese	Female	Ppara	2.24
Obese	Female	Ppara	1.37
Obese	Female	Ppara	2.82
Obese	Female	Ppara	2.03
Control	Male	CPT1	0.61
Control	Male	CPT1	0.96
Control	Male	CPT1	1.39
Control	Male	CPT1	0.86
Control	Male	CPT1	0.57
Control	Male	CPT1	0.93
Control	Male	CPT1	1.74
Control	Male	CPT1	0.94
Obese	Male	CPT1	1.88
Obese	Male	CPT1	1.51
Obese	Male	CPT1	1.27
Obese	Male	CPT1	1.4
Obese	Male	CPT1	1.42
Obese	Male	CPT1	1.6
Obese	Male	CPT1	1.1
Control	Female	CPT1	0.76
Control	Female	CPT1	1.11
Control	Female	CPT1	1.5
Control	Female	CPT1	0.83
Control	Female	CPT1	0.68
Control	Female	CPT1	0.4
Control	Female	CPT1	0.71
Control	Female	CPT1	0.41
Control	Female	CPT1	0.52
Control	Female	CPT1	0.99
Control	Female	CPT1	0.64
Obese	Female	CPT1	1.3
Obese	Female	CPT1	1.2
Obese	Female	CPT1	1.49
Obese	Female	CPT1	1.27
Obese	Female	CPT1	1.16
Obese	Female	CPT1	1.47
Obese	Female	CPT1	1.22
Obese	Female	CPT1	1.38
Control	Male	CPT2	1.1
Control	Male	CPT2	1.04
Control	Male	CPT2	1.17
Control	Male	CPT2	1.04
Control	Male	CPT2	0.95
Control	Male	CPT2	0.87
Control	Male	CPT2	1.02
Control	Male	CPT2	0.8
Obese	Male	CPT2	1.82
Obese	Male	CPT2	1.36
Obese	Male	CPT2	1.68
Obese	Male	CPT2	1.48
Obese	Male	CPT2	2.51
Obese	Male	CPT2	2.11
Obese	Male	CPT2	2.28
Control	Female	CPT2	0.66
Control	Female	CPT2	1.08
Control	Female	CPT2	0.75
Control	Female	CPT2	1.21
Control	Female	CPT2	0.95
Control	Female	CPT2	0.72
Control	Female	CPT2	0.91
Obese	Female	CPT2	1.96
Obese	Female	CPT2	2.01
Obese	Female	CPT2	2.02
Obese	Female	CPT2	1.64
Obese	Female	CPT2	2.51
Obese	Female	CPT2	1.54
Obese	Female	CPT2	2.13
Control	Male	Acot2	1.06
Control	Male	Acot2	1.17
Control	Male	Acot2	1.4
Control	Male	Acot2	1.05
Control	Male	Acot2	0.88
Control	Male	Acot2	0.93
Control	Male	Acot2	0.83
Control	Male	Acot2	0.68
Obese	Male	Acot2	1.89
Obese	Male	Acot2	2.1
Obese	Male	Acot2	1.59
Obese	Male	Acot2	2.05
Obese	Male	Acot2	3.1
Obese	Male	Acot2	2.5
Obese	Male	Acot2	2.55
Control	Female	Acot2	0.75
Control	Female	Acot2	1.25
Control	Female	Acot2	0.36
Control	Female	Acot2	0.75
Control	Female	Acot2	0.78
Control	Female	Acot2	1.19
Control	Female	Acot2	1.05
Control	Female	Acot2	1.83
Obese	Female	Acot2	2.44
Obese	Female	Acot2	2.76
Obese	Female	Acot2	2.03
Obese	Female	Acot2	3.07
Obese	Female	Acot2	1.78
Obese	Female	Acot2	1.93
Control	Male	Mvk	0.82
Control	Male	Mvk	0.89
Control	Male	Mvk	1.29
Control	Male	Mvk	0.98
Control	Male	Mvk	0.71
Control	Male	Mvk	1.05
Control	Male	Mvk	1.56
Control	Male	Mvk	0.7
Obese	Male	Mvk	0.66
Obese	Male	Mvk	0.68
Obese	Male	Mvk	1.09
Obese	Male	Mvk	0.75
Obese	Male	Mvk	0.48
Obese	Male	Mvk	0.64
Obese	Male	Mvk	0.36
Control	Female	Mvk	0.81
Control	Female	Mvk	0.99
Control	Female	Mvk	1.08
Control	Female	Mvk	0.94
Control	Female	Mvk	0.84
Control	Female	Mvk	0.72
Control	Female	Mvk	0.55
Control	Female	Mvk	0.82
Control	Female	Mvk	0.63
Control	Female	Mvk	0.71
Control	Female	Mvk	0.77
Obese	Female	Mvk	0.56
Obese	Female	Mvk	0.7
Obese	Female	Mvk	0.57
Obese	Female	Mvk	0.47
Obese	Female	Mvk	0.53
Obese	Female	Mvk	0.34
Obese	Female	Mvk	0.69
Obese	Female	Mvk	0.62
