# Supplementary material for: Maternal diet-induced obesity during pregnancy alters lipid supply to mouse E18.5 fetuses and changes the cardiac tissue lipidome in a sex-dependent manner
Source: eLife. 2022 Jan 13;11:e69078. doi: 10.7554/eLife.69078 (PMC8794468; doi:10.7554/eLife.69078)
Supplement: Figure 6—source data 1. [file elife-69078-fig6-data1.csv]

Figure 6-source data 1
Figure 6A
Acyl-carnitine classes abundance in fetal heart (�M/mg)
	total carnitine	free carnitine	acyl-carnitine	saturated	unsaturated	hydroxilated	non-hydroxilated	short-chain	long-chain
Male_Control	1.629906446	0.2569	1.373006446	1.25459	0.118416446	0.08743	1.285576446	1.07592	0.297086446
Male_Control.1	1.50501	0.22742	1.27759	1.12324	0.15435	0.08656	1.19103	0.9438	0.33379
Male_Control.2	1.09192	0.14073	0.95119	0.85376	0.09743	0.08567	0.86552	0.69771	0.25348
Male_Control.3	1.04505	0.17503	0.87002	0.79873	0.07129	0.08146	0.78856	0.67529	0.19473
Male_Control.4	1.60284	0.18257	1.42027	1.13084	0.28943	0.06656	1.35371	0.89131	0.52896
Male_Control.5	1.12736	0.19095	0.93641	0.85324	0.08317	0.05625	0.88016	0.75106	0.18535
Male_Control.6	1.575659516	0.23122	1.344439516	1.15661	0.187829516	0.09376	1.250679516	0.89849	0.445949516
Male_Obese	1.20713	0.23757	0.96956	0.82611	0.14345	0.05444	0.91512	0.67424	0.29532
Male_Obese.1	1.6261	0.23867	1.38743	1.29891	0.08852	0.20807	1.17936	1.16966	0.21777
Male_Obese.2	0.99339	0.11383	0.87956	0.75148	0.12808	0.06523	0.81433	0.60471	0.27485
Male_Obese.3	1.41413	0.18668	1.22745	0.99423	0.23322	0.11017	1.11728	0.79292	0.43453
Male_Obese.4	1.475006804	0.19242	1.282586804	1.022812576	0.259774228	0.12087	1.161716804	0.71864	0.563946804
Male_Obese.5	1.756301648	0.32292	1.433381648	1.225231648	0.20815	0.15373	1.279651648	1.00412	0.429261648
Male_Obese.6	2.417735261	0.24473	2.173005261	1.739476771	0.43352849	0.1998	1.973205261	1.25946	0.913545261
Female_Control	1.38335	0.13032	1.25303	0.99494	0.25809	0.09694	1.15609	0.76816	0.48487
Female_Control.1	1.61227	0.25718	1.35509	1.18252	0.17257	0.07808	1.27701	1.01294	0.34215
Female_Control.2	1.59677	0.25599	1.34078	1.14591	0.19487	0.04997	1.29081	1.00064	0.34014
Female_Control.3	1.12117	0.12997	0.9912	0.79546	0.19574	0.07204	0.91916	0.584	0.4072
Female_Control.4	1.47642	0.2421	1.23432	1.08931	0.14501	0.08247	1.15185	0.95357	0.28075
Female_Control.5	1.70642	0.20301	1.50341	1.25095	0.25246	0.10863	1.39478	1.06071	0.4427
Female_Control.6	1.35221	0.15683	1.19538	0.97331	0.22207	0.07641	1.11897	0.78318	0.4122
Female_Obese	1.29518	0.20017	1.09501	0.90121	0.1938	0.07185	1.02316	0.7603	0.33471
Female_Obese.1	1.32295	0.17265	1.1503	0.96254	0.18776	0.06475	1.08555	0.8021	0.3482
Female_Obese.2	1.24062	0.1819	1.05872	0.86021	0.19851	0.07472	0.984	0.71008	0.34864
Female_Obese.3	1.58063	0.202	1.37863	1.21119	0.16744	0.11116	1.26747	1.06488	0.31375
Female_Obese.4	1.98767	0.27497	1.7127	1.52339	0.18931	0.24049	1.47221	1.34972	0.36298
Female_Obese.5	2.01328	0.37772	1.63556	1.48024	0.15532	0.11498	1.52058	1.31685	0.31871
