# Supplementary material for: Maternal diet-induced obesity during pregnancy alters lipid supply to mouse E18.5 fetuses and changes the cardiac tissue lipidome in a sex-dependent manner
Source: eLife journal article supplement (doi:10.7554/elife.69078), 2022-01-13
Supplement: supp [file elife_poa_e69078_Figure_1_figure_supplement_1.pdf › elife_poa_e69078_Figure_1_figure_supplement_1.pdf]

A

200  $\mu\text{m}$ 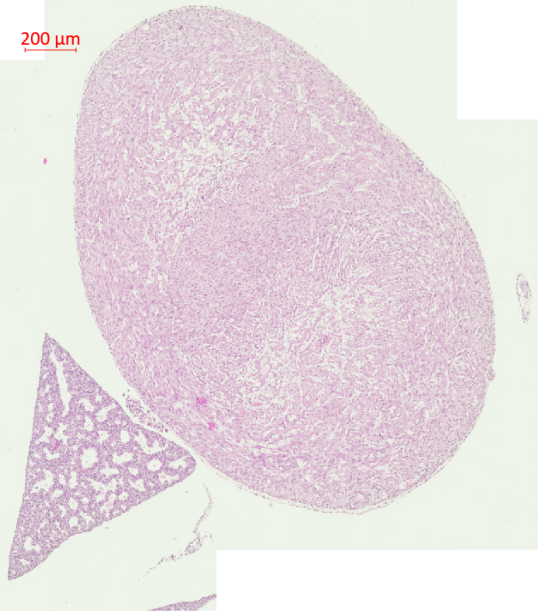

B

200  $\mu\text{m}$ 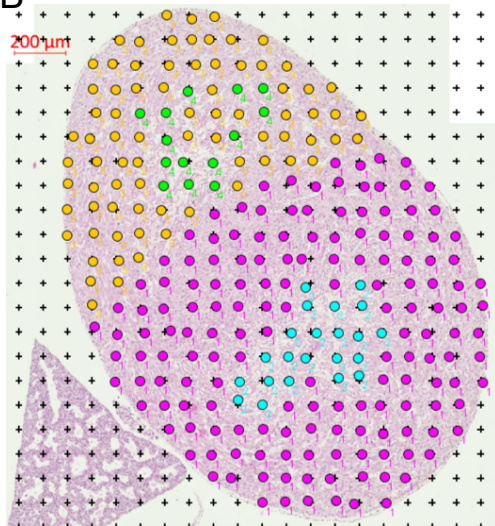

- Left ventricle wall
- Left ventricle lumen
- Right ventricle wall
- Right ventricle lumen
