# Supplementary material for: Maternal diet-induced obesity during pregnancy alters lipid supply to mouse E18.5 fetuses and changes the cardiac tissue lipidome in a sex-dependent manner
Source: eLife journal article supplement (doi:10.7554/elife.69078), 2022-01-13
Supplement: supp [file elife_poa_e69078_Figure_3_figure_supplement_1.pdf › elife_poa_e69078_Figure_3_figure_supplement_1.pdf]

**FA 14:0**

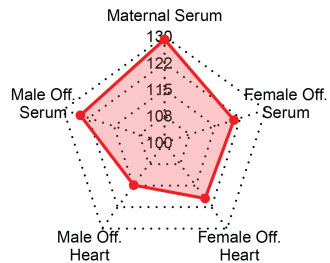

**FA 14:1**

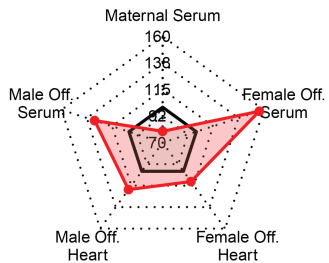

**FA 15:0**

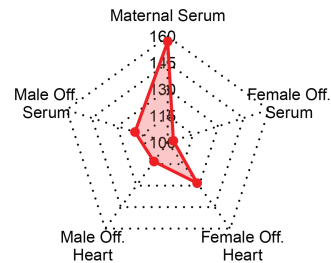

**FA 17:0**

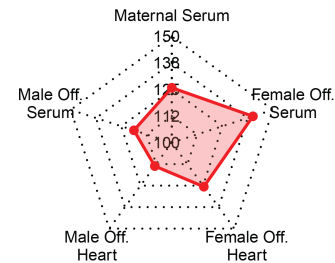

**FA 18:1**

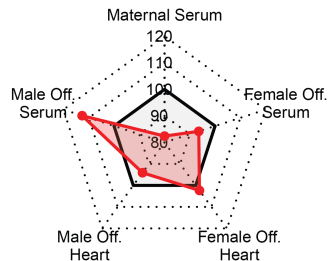

**FA 20:1**

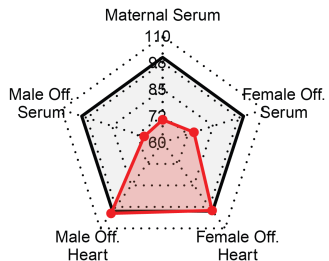

**FA 20:3**

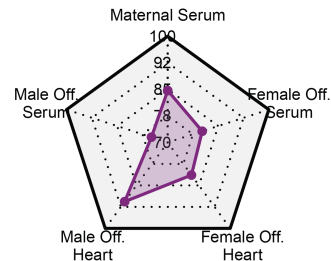

**FA 22:5**

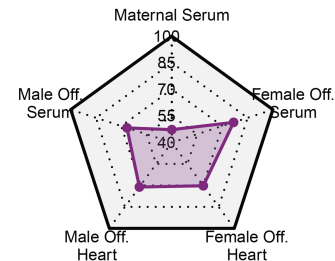

**FA 16:1**

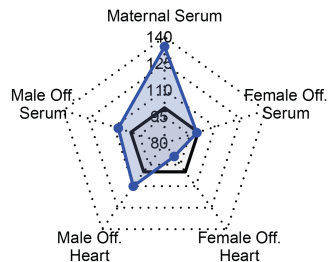

**FA 22:6**

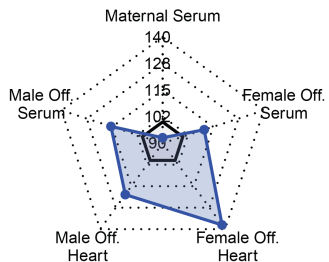

- Changed in the serum
- Changed in the heart
- Changed in the serum and in the heart
