# Supplementary material for: Maternal diet-induced obesity during pregnancy alters lipid supply to mouse E18.5 fetuses and changes the cardiac tissue lipidome in a sex-dependent manner
Source: eLife journal article supplement (doi:10.7554/elife.69078), 2022-01-13
Supplement: supp [file elife_poa_e69078_Figure_4_figure_supplement_2.pdf › elife_poa_e69078_Figure_4_figure_supplement_2.pdf]

male

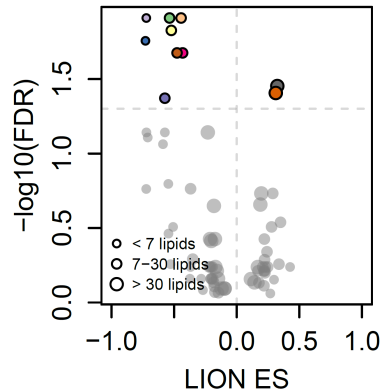

female

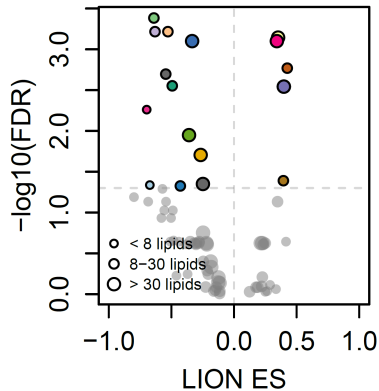

- fatty acid with 16–18 carbons
- saturated fatty acid
- fatty acid with less than 2 double bonds
- headgroup with neutral charge
- glycerophospholipids [GP]
- glycerolipids [GL]
- triacylglycerols [GL0301]
- lysoglycerophospholipids
- positive intrinsic curvature
- lipid storage
- lipid droplet
- fatty acid with 18 carbons
- headgroup with negative charge
- lipid-mediated signalling
- ceramide phosphocholines (sphingomyelins) [SP0301]
- endoplasmic reticulum (ER)
- C16:0
- fatty acid with more than 18 carbons
