# Supplementary material for: Maternal diet-induced obesity during pregnancy alters lipid supply to mouse E18.5 fetuses and changes the cardiac tissue lipidome in a sex-dependent manner
Source: eLife. 2022 Jan 13;11:e69078. doi: 10.7554/eLife.69078 (PMC8794468; doi:10.7554/eLife.69078)
Supplement: Supplementary file 1. — Isobar annotations were obtained from LIPID MAPS Structure Database and a mass tolerance (m/z) threshold:±0.001 was used. For multiple isobars per m/z, biological likelihood was employed to predict the likely identification. Main classes were predicted according to the likely identification. [file elife-69078-supp1.csv]

m/z	Main Lipid Class	Likely Identification	Possible Identification #1	Possible Identification #2	Possible Identification #3	Possible Identification #4	Possible Identification #5
367.3359	Sterols	ST 27:2;O_[M+H-H2O]+
369.3516	Sterols	ST 27:1;O_[M+H-H2O]+
383.3308	Sterols	ST 27:3;O_[M+H]+	ST 27:2;O2_[M+H-H2O]+
383.3672	Sterols	ST 28:1;O_[M+H-H2O]+
454.2928	Phosphatidylethanolamines	LPE 16:0_[M+H]+	LPC 13:0_[M+H]+	LPE O-16:1;O_[M+H]+	LPA 18:1_[M+NH4]+
468.3085	Phosphatidylcholines	LPC 14:0_[M+H]+	LPE 17:0_[M+H]+	LPE O-17:1;O_[M+H]+	PC O-14:0_[M+H]+	NA 27:6;O3_[M+Na]+	LPA 19:1_[M+NH4]+
478.3297	Phosphatidylcholines	PE O-19:1;O_[M+H]+	LPC 16:0_[M+H-H2O]+	LPE 19:0_[M+H-H2O]+	LPE O-19:1;O_[M+H-H2O]+	PC O-16:0_[M+H-H2O]+
482.3247	Phosphatidylcholines	LPC 15:0_[M+H]+	LPE 18:0_[M+H]+	LPE O-18:1;O_[M+H]+	LPA 20:1_[M+NH4]+
482.3611	Phosphatidylcholines	LPC O-16:0_[M+H]+
494.3241	Phosphatidylcholines	LPC 16:1_[M+H]+	LPE 19:1_[M+H]+	LPS O-18:0_[M+H-H2O]+	CAR 22:6_[M+Na]+
496.3404	Phosphatidylcholines	LPC 16:0_[M+H]+	LPE 19:0_[M+H]+	LPE O-19:1;O_[M+H]+	PC O-16:0_[M+H]+	CAR 22:5_[M+Na]+
502.2928	Phosphatidylethanolamines	LPE 20:4_[M+H]+
502.3297	Phosphatidylcholines	LPC 18:2_[M+H-H2O]+
506.361	Phosphatidylcholines	CerP 26:1;O2_[M+H]+	LPC O-18:2_[M+H]+	LPC 18:0_[M+H-H2O]+	LPE 21:0_[M+H-H2O]+	PC O-18:0_[M+H-H2O]+
508.3398	Phosphatidylcholines	LPC 17:1_[M+H]+	LPE 20:1_[M+H]+	LPA 22:2_[M+NH4]+
510.3554	Phosphatidylethanolamines	LPE 20:0_[M+H]+	PC O-17:0_[M+H]+	LPC 17:0_[M+H]+	LPC O-17:1;O_[M+H]+	LPA 22:1_[M+NH4]+
516.3085	Phosphatidylcholines	LPC 18:4_[M+H]+
518.3241	Phosphatidylcholines	LPC 18:3_[M+H]+	PC 18:1_[M+H-H2O]+
520.3398	Phosphatidylcholines	LPC 18:2_[M+H]+	LPS O-20:1_[M+H-H2O]+	PC 18:0_[M+H-H2O]+
520.5088	Ceramides	Cer 34:1;O2_[M+H-H2O]+	FA 34:3_[M+NH4]+	WE 34:3_[M+NH4]+
521.4564	Diacylglycerols	DG 30:1_[M+H-H2O]+
522.3554	Phosphatidylcholines	LPC 18:1_[M+H]+	PC O-18:1_[M+H]+	LPS O-20:0_[M+H-H2O]+
523.4721	Diacylglycerols	DG 30:0_[M+H-H2O]+
524.3711	Phosphatidylcholines	LPC 18:0_[M+H]+	LPE 21:0_[M+H]+	PC O-18:0_[M+H]+
526.2928	Phosphatidylethanolamines	LPE 22:6_[M+H]+
526.3297	Phosphatidylcholines	LPC 20:4_[M+H-H2O]+
527.3343	Phosphatidylglycerols	LPG 19:0_[M+H]+
542.3241	Phosphatidylcholines	LPC 20:5_[M+H]+	LPC 20:4;O_[M+H-H2O]+
544.3398	Phosphatidylcholines	LPC 20:4_[M+H]+
544.3973	Phosphatidylglycerols	LPG O-20:0_[M+NH4]+
546.3554	Phosphatidylcholines	LPC 20:3_[M+H]+	PC 20:1_[M+H-H2O]+
547.4721	Diacylglycerols	DG 32:2_[M+H-H2O]+	FAHFA 35:4;O_[M+H]+
548.3711	Phosphatidylcholines	LPC 20:2_[M+H]+	PC O-20:2_[M+H]+	PC 20:0_[M+H-H2O]+	PE-NMe 22:0_[M+H-H2O]+
549.4877	Diacylglycerols	DG 32:1_[M+H-H2O]+
551.5034	Diacylglycerols	DG 32:0_[M+H-H2O]+	DG O-32:2_[M+H]+
563.5034	Diacylglycerols	DG 33:1_[M+H-H2O]+
565.519	Diacylglycerols	DG 33:0_[M+H-H2O]+	FAHFA 36:2;O_[M+H]+
568.3398	Phosphatidylcholines	LPC 22:6_[M+H]+
570.356	Phosphatidylcholines	LPC 22:5_[M+H]+
573.4877	Diacylglycerols	DG 34:3_[M+H-H2O]+
575.5034	Diacylglycerols	DG 34:2_[M+H-H2O]+	FAHFA 37:4;O_[M+H]+
577.519	Diacylglycerols	DG 34:1_[M+H-H2O]+	FOH 37:4;O3_[M+H]+	DG 35:2_[M+H-H2O]+
579.5347	Diacylglycerols	DG 34:0_[M+H-H2O]+
589.519	Diacylglycerols	DG 35:2_[M+H-H2O]+	FAHFA 38:4;O_[M+H]+
591.5347	Diacylglycerols	DG 35:1_[M+H-H2O]+
597.4877	Diacylglycerols	DG 36:5_[M+H-H2O]+
599.5034	Diacylglycerols	DG 36:4_[M+H-H2O]+
601.519	Diacylglycerols	DG 36:3_[M+H-H2O]+
603.5347	Diacylglycerols	DG 36:2_[M+H-H2O]+	DG O-36:4_[M+H]+
604.6027	Ceramides	Cer 40:1;O2_[M+H-H2O]+	WE 40:3_[M+NH4]+
605.5503	Diacylglycerols	DG 36:1_[M+H-H2O]+
623.5034	Diacylglycerols	DG 38:6_[M+H-H2O]+	DG O-38:8_[M+H]+
625.519	Diacylglycerols	DG 38:5_[M+H-H2O]+
627.5347	Diacylglycerols	DG 38:4_[M+H-H2O]+
630.6184	Ceramides	Cer 42:2;O2_[M+H-H2O]+
631.566	Diacylglycerols	DG 38:2_[M+H-H2O]+
632.634	Ceramides	Cer 42:1;O2_[M+H-H2O]+	Cer 42:2;O_[M+H]+
643.3817	Phosphatidylinositols	LPI 21:0_[M+H]+
649.519	Diacylglycerols	DG 40:7_[M+H-H2O]+	DG O-40:9_[M+H]+
651.5347	Diacylglycerols	DG 40:6_[M+H-H2O]+	DG O-40:8_[M+H]+
653.5503	Diacylglycerols	DG 40:5_[M+H-H2O]+
666.6184	Cholesteryl esters	CE 18:2_[M+NH4]+
671.5738	Cholesteryl esters	CE 18:2_[M+Na]+
672.5772	Triacylglycerols	TG 36:0;O
673.5894	Cholesteryl esters	CE 18:1_[M+Na]+
675.5437	Sphingomyelins	SM 32:1;O2_[M+H]+	EPC 35:1;O2_[M+H]+
682.4811	Phosphatidylcholines	PC 30:3_[M+H-H2O]+	PE 33:3_[M+H-H2O]+
689.5593	Sphingomyelins	SM 33:1;O2_[M+H]+	EPC 36:1;O2_[M+H]+	EPC 36:0;O3_[M+H-H2O]+
690.6184	Cholesteryl esters	CE 20:4_[M+NH4]+
695.5738	Cholesteryl esters	CE 20:4_[M+Na]+
696.5772	Triacylglycerols	TG 38:2;O	HexCer 35:1;O2_[M+H-H2O]+
701.5593	Sphingomyelins	SM 34:2;O2_[M+H]+	EPC 37:2;O2_[M+H]+	EPC 37:1;O3_[M+H-H2O]+	SM 34:1;O3_[M+H-H2O]+	PE dO-34:4_[M+NH4]+
703.575	Sphingomyelins	SM 34:1;O2_[M+H]+	EPC 37:1;O2_[M+H]+
704.5828	Triacylglycerols	TG 40:4
706.5387	Phosphatidylcholines	PC 30:0_[M+H]+	PE 33:0_[M+H]+	PE-NMe 32:0_[M+H]+	PA 35:1_[M+NH4]+
711.3996	Phosphatidic acids	PA 36:8_[M+Na]+
714.6184	Cholesteryl esters	CE 22:6_[M+NH4]+
719.5738	Cholesteryl esters	CE 22:6_[M+Na]+
720.5543	Phosphatidylethanolamines	PE 34:0_[M+H]+	PC 31:0_[M+H]+	PE-NMe2 32:0_[M+H]+	PA 36:1_[M+NH4]+
720.5907	Phosphatidylcholines	PC O-32:0_[M+H]+	PE O-35:0_[M+H]+	PA O-37:1_[M+NH4]+
722.4967	Phosphatidylserines	PS 31:0_[M+H]+	PG 31:2_[M+NH4]+
723.4935	Phosphatidic acids	PA 36:2_[M+Na]+
725.5092	Phosphatidic acids	PA 36:1_[M+Na]+
725.5593	Sphingomyelins	SM 36:4
729.5906	Sphingomyelins	SM 36:2;O2_[M+H]+	EPC 39:2;O2_[M+H]+
730.5387	Phosphatidylcholines	PC 32:2_[M+H]+	PE 35:2_[M+H]+	PS O-34:1_[M+H-H2O]+	PA 37:3_[M+NH4]+
731.6063	Sphingomyelins	SM 36:1;O2_[M+H]+	EPC 39:1;O2_[M+H]+
732.5543	Phosphatidylcholines	PC 32:1_[M+H]+	PE 35:1_[M+H]+	PE-NMe 34:1_[M+H]+	PS O-34:0_[M+H-H2O]+	PA 37:2_[M+NH4]+	PG dO-34:4_[M+NH4]+
734.57	Phosphatidylcholines	PC 32:0_[M+H]+	PE 35:0_[M+H]+	PA 37:1_[M+NH4]+
734.6058	Phosphatidylethanolamines	PE O-36:0_[M+H]+	PC O-33:0_[M+H]+	PA O-38:1_[M+NH4]+
740.523	Phosphatidylethanolamines	PE 36:4_[M+H]+	PC 33:4_[M+H]+	PE O-36:5;O_[M+H]+	PS O-35:3_[M+H-H2O]+	PA 38:5_[M+NH4]+
744.5543	Phosphatidylethanolamines	PE 36:2_[M+H]+	PC 33:2_[M+H]+	PS O-35:1_[M+H-H2O]+	PA 38:3_[M+NH4]+
744.5902	Phosphatidylcholines	PC O-34:2_[M+H]+	PE O-37:2_[M+H]+	PC 34:0_[M+H-H2O]+	PE 37:0_[M+H-H2O]+	PE-NMe 36:0_[M+H-H2O]+
746.57	Phosphatidylethanolamines	PE 36:1_[M+H]+	PC 33:1_[M+H]+	PE-NMe2 34:1_[M+H]+	PS O-35:0_[M+H-H2O]+	PA 38:2_[M+NH4]+
746.6063	Phosphatidylcholines	PC O-34:1_[M+H]+	PE O-37:1_[M+H]+	PA O-39:2_[M+NH4]+
746.6293	Triacylglycerols	TG 43:4_[M+NH4]+
754.5387	Phosphatidylcholines	PC 34:4_[M+H]+	PE 37:4_[M+H]+	PS O-36:3_[M+H-H2O]+	PA 39:5_[M+NH4]+
756.5543	Phosphatidylcholines	PC 34:3_[M+H]+	PE 37:3_[M+H]+	PS O-36:2_[M+H-H2O]+	PA 39:4_[M+NH4]+
758.57	Phosphatidylcholines	PC 34:2_[M+H]+	PE 37:2_[M+H]+	PE-NMe 36:2_[M+H]+	PS O-36:1_[M+H-H2O]+	PA 39:3_[M+NH4]+
759.6376	Sphingomyelins	SM 38:1;O2_[M+H]+
760.5856	Phosphatidylcholines	PC 34:1_[M+H]+	PE 37:1_[M+H]+	PS O-36:0_[M+H-H2O]+	PA 39:2_[M+NH4]+
764.523	Phosphatidylethanolamines	PE 38:6_[M+H]+	PC 35:6_[M+H]+	PE O-38:7;O_[M+H]+	PE 38:5;O_[M+H-H2O]+	PA 40:7_[M+NH4]+
767.5197	Phosphatidylglycerols	PG O-35:3_[M+Na]+
768.5902	Phosphatidylcholines	PC O-36:4_[M+H]+	PC 36:2_[M+H-H2O]+	PE 39:2_[M+H-H2O]+
772.5857	Phosphatidylethanolamines	PE 38:2_[M+H]+	PC 35:2_[M+H]+	PE-NMe2 36:2_[M+H]+	PS O-37:1_[M+H-H2O]+	PA 40:3_[M+NH4]+
772.6085	Triacylglycerols	TG 44:6;O
774.6013	Phosphatidylethanolamines	PE 38:1_[M+H]+	PC 35:1_[M+H]+	PS O-37:0_[M+H-H2O]+	PA 40:2_[M+NH4]+
776.5589	Phosphatidylethanolamines	PE O-40:7_[M+H]+	PC 37:5_[M+H-H2O]+	PE 40:5_[M+H-H2O]+
778.5387	Phosphatidylcholines	PC 36:6_[M+H]+	PE 39:6_[M+H]+	PS O-38:5_[M+H-H2O]+	PA 41:7_[M+NH4]+	PG dO-38:9_[M+NH4]+
779.5561	Phosphatidic acids	PA 40:2_[M+Na]+
780.5543	Phosphatidylcholines	PC 36:5_[M+H]+	PE 39:5_[M+H]+	PC 36:4;O_[M+H-H2O]+	PS O-38:4_[M+H-H2O]+	PA 41:6_[M+NH4]+
782.4814	Phosphatidylinositols	PI 29:2_[M+NH4]+
782.57	Phosphatidylcholines	PC 36:4_[M+H]+	PE 39:4_[M+H]+	PS O-38:3_[M+H-H2O]+	PA 41:5_[M+NH4]+
784.5856	Phosphatidylcholines	PC 36:3_[M+H]+	PE 39:3_[M+H]+	PS O-38:2_[M+H-H2O]+	PA 41:4_[M+NH4]+
785.6532	Sphingomyelins	SM 40:2;O2_[M+H]+	PC dO-37:4_[M+NH4]+
786.6013	Phosphatidylcholines	PC 36:2_[M+H]+	PE 39:2_[M+H]+	PS O-38:1_[M+H-H2O]+	PA 41:3_[M+NH4]+
786.6371	Phosphatidylethanolamines	PC O-37:2_[M+H]+	PE O-40:2_[M+H]+	PC 37:0_[M+H-H2O]+	PE 40:0_[M+H-H2O]+	PA O-42:3_[M+NH4]+
786.6606	Triacylglycerols	TG 46:5_[M+NH4]+
787.4521	Phosphatidylglycerols	PG 36:7_[M+Na]+
787.6689	Sphingomyelins	SM 40:1;O2_[M+H]+
788.6169	Phosphatidylcholines	PC 36:1_[M+H]+	PE 39:1_[M+H]+	PS O-38:0_[M+H-H2O]+	PA 41:2_[M+NH4]+
788.6763	Triacylglycerols	TG 46:4_[M+NH4]+
790.4993	Phosphatidylserines	PS O-36:5_[M+Na]+
790.5745	Phosphatidylcholines	PC O-38:7_[M+H]+	PC 38:5_[M+H-H2O]+	PE 41:5_[M+H-H2O]+
791.616	Triacylglycerols	TG 46:5_[M+Na]+	PG O-38:1_[M+H]+
792.6711	Triacylglycerols	TG 45:3;O	HexCer 42:2;O2_[M+H-H2O]+
794.5306	Phosphatidylserines	PS O-36:3_[M+Na]+
796.5463	Phosphatidylserines	PS O-36:2_[M+Na]+
796.5857	Phosphatidylethanolamines	PE 40:4_[M+H]+	PC 37:4_[M+H]+	PA 42:5_[M+NH4]+
796.6215	Phosphatidylcholines	PC O-38:4_[M+H]+	PC 38:2_[M+H-H2O]+	PE 41:2_[M+H-H2O]+
804.481	Phosphatidylserines	PS 38:8_[M+H]+
806.57	Phosphatidylcholines	PC 38:6_[M+H]+	PE 41:6_[M+H]+	PS O-40:5_[M+H-H2O]+	PG dO-40:9_[M+NH4]+
808.5856	Phosphatidylcholines	PC 38:5_[M+H]+	PE 41:5_[M+H]+	PC 38:4;O_[M+H-H2O]+	PS O-40:4_[M+H-H2O]+	PA 43:6_[M+NH4]+	PG dO-40:9_[M+NH4]+
809.6532	Sphingomyelins	SM 42:4;O2
810.6013	Phosphatidylcholines	PC 38:4_[M+H]+	PE 41:4_[M+H]+	PS O-40:3_[M+H-H2O]+
811.6689	Sphingomyelins	SM 42:3;O2_[M+H]+
812.5647	Phosphatidylinositols	PI O-32:1_[M+NH4]+
812.6169	Phosphatidylcholines	PC 38:3_[M+H]+	PE 41:3_[M+H]+	PS O-40:2_[M+H-H2O]+	PA 43:4_[M+NH4]+
812.6763	Triacylglycerols	TG 48:6_[M+NH4]+
813.6845	Sphingomyelins	SM 42:2;O2_[M+H]+
814.6326	Phosphatidylcholines	PC 38:2_[M+H]+	PE 41:2_[M+H]+	PS O-40:1_[M+H-H2O]+
814.6919	Triacylglycerols	TG 48:5_[M+NH4]+
815.7002	Sphingomyelins	SM 42:1;O2_[M+H]+
816.7076	Triacylglycerols	TG 48:4_[M+NH4]+
818.6063	Phosphatidylcholines	PC O-40:7_[M+H]+	PC 40:5_[M+H-H2O]+
820.6215	Phosphatidylcholines	PC O-40:6_[M+H]+	PC 40:4_[M+H-H2O]+	PE 43:4_[M+H-H2O]+
820.7389	Triacylglycerols	TG 48:2_[M+NH4]+
822.7545	Triacylglycerols	TG 48:1_[M+NH4]+
828.5544	Phosphatidylcholines	PC 40:9_[M+H]+
832.5857	Phosphatidylcholines	PC 40:7_[M+H]+	PS O-42:6_[M+H-H2O]+
834.6013	Phosphatidylcholines	PC 40:6_[M+H]+	PE 43:6_[M+H]+	PS O-42:5_[M+H-H2O]+
835.6689	Sphingomyelins	SM 44:5
836.6169	Phosphatidylcholines	PC 40:5_[M+H]+	PS O-42:4_[M+H-H2O]+
838.6532	Phosphatidylglycerols	PG 39:0_[M+NH4]+
846.7545	Triacylglycerols	TG 50:3_[M+NH4]+
848.7702	Triacylglycerols	TG 50:2_[M+NH4]+
850.7858	Triacylglycerols	TG 50:1_[M+NH4]+
852.8015	Triacylglycerols	TG 50:0_[M+NH4]+
853.7256	Triacylglycerols	TG 50:2_[M+Na]+
854.5753	Phosphatidylinositols	PI 34:1_[M+NH4]+
855.7412	Triacylglycerols	TG 50:1_[M+Na]+
856.5857	Phosphatidylcholines	PC 42:9_[M+H]+
862.6895	Phosphatidylserines	PS O-42:0_[M+H]+	PG O-42:2_[M+NH4]+
862.7858	Triacylglycerols	TG 51:2_[M+NH4]+
863.7099	Triacylglycerols	TG 51:4_[M+Na]+
864.6846	Phosphatidylcholines	PC-P 43:4
865.6317	Triacylglycerols	TG 52:10_[M+Na]+	PG 44:4_[M+H-H2O]+
867.6086	Phosphatidylglycerols	PG 41:2_[M+Na]+
869.5303	Phosphatidylglycerols	PG 42:8_[M+Na]+
869.5538	Phosphatidylinositols	PI O-38:6_[M+H]+	Glc-GP 38:4_[M+H-H2O]+	PI 38:4_[M+H-H2O]+
870.7545	Triacylglycerols	TG 52:5_[M+NH4]+
872.7702	Triacylglycerols	TG 52:4_[M+NH4]+
874.7858	Triacylglycerols	TG 52:3_[M+NH4]+
876.8015	Triacylglycerols	TG 52:2_[M+NH4]+
878.8171	Triacylglycerols	TG 52:1_[M+NH4]+
879.7412	Triacylglycerols	TG 52:3_[M+Na]+
880.8328	Triacylglycerols	TG 52:0_[M+NH4]+
881.7569	Triacylglycerols	TG 52:2_[M+Na]+
882.7545	Triacylglycerols	TG 53:6_[M+NH4]+
883.7725	Triacylglycerols	TG 52:1_[M+Na]+
884.5412	Phosphatidylserines	PS 42:7_[M+Na]+
894.7545	Triacylglycerols	TG 54:7_[M+NH4]+
895.6634	Phosphatidylinositols	PI O-39:0_[M+H]+
896.7702	Triacylglycerols	TG 54:6_[M+NH4]+
898.7858	Triacylglycerols	TG 54:5_[M+NH4]+
900.8015	Triacylglycerols	TG 54:4_[M+NH4]+
902.8171	Triacylglycerols	TG 54:3_[M+NH4]+
904.8328	Triacylglycerols	TG 54:2_[M+NH4]+
907.7725	Triacylglycerols	TG 54:3_[M+Na]+
909.5464	Phosphatidylinositols	PI 38:4_[M+Na]+	Glc-GP 38:4_[M+Na]+
910.544	Phosphatidylinositols	PI 39:8_[M+NH4]+
920.7702	Triacylglycerols	TG 56:8_[M+NH4]+
922.7858	Triacylglycerols	TG 56:7_[M+NH4]+
924.8015	Triacylglycerols	TG 56:6_[M+NH4]+
925.7863	Phosphatidylcholines	PC O-47:2	PC P-47:1
926.8171	Triacylglycerols	TG 56:5_[M+NH4]+
927.8351	Triacylglycerols	TG 55:0_[M+Na]+
948.8015	Triacylglycerols	TG 58:8_[M+NH4]+
949.8195	Triacylglycerols	TG 57:3_[M+Na]+
950.8171	Triacylglycerols	TG 58:7_[M+NH4]+
