# Supplementary material for: Maternal diet-induced obesity during pregnancy alters lipid supply to mouse E18.5 fetuses and changes the cardiac tissue lipidome in a sex-dependent manner
Source: eLife. 2022 Jan 13;11:e69078. doi: 10.7554/eLife.69078 (PMC8794468; doi:10.7554/eLife.69078)
Supplement: Supplementary file 2. — Isobar annotations were obtained from LIPID MAPS Structure Database and a mass tolerance (m/z) threshold:±0.001 was used. For multiple isobars per m/z, biological likelihood was employed to predict the likely identification. Main classes were predicted according to the likely identification. [file elife-69078-supp2.csv]

m/z	Main Lipid Class	Likely Identification	Possible Identification #1	Possible Identification #2	Possible Identification #3	Possible Identification #4	Possible Identification #5	Possible Identification #6
316.2847	Ceramides	Cer 18:0	SPB 18:1;O3_[M+H]+
355.2848	Diacylglycerols	DG 18:0_[M+H-H2O]+	FA 21:2;O2_[M+H]+	FOH 21:3;O3_[M+H]+	MG 18:2_[M+H]+
367.3359	Sterols	ST 27:2;O_[M+H-H2O]+
372.3473	Ceramides	Cer 22:0	FA 22:1;O_[M+NH4]+
383.3161	Diacylglycerols	DG 20:0_[M+H-H2O]+	FA 23:2;O2_[M+H]+	FOH 23:3;O3_[M+H]+
396.3108	Monoradylglycerols	MG 20:4_[M+NH4]+	CAR 16:2_[M+H]+	CAR 16:1;O_[M+H-H2O]+	NA 23:2;O4_[M+H-H2O]+	FA 23:4;O2_[M+NH4]+	FOH 23:5;O3_[M+NH4]+	ST 23:1;O4_[M+NH4]+
398.327	Monoradylglycerols	MG 20:3_[M+NH4]+	CAR 16:1_[M+H]+	CAR 16:0;O_[M+H-H2O]+	FOH 23:4;O3_[M+NH4]+	ST 23:0;O4_[M+NH4]+
411.3474	Diacylglycerols	DG 22:0_[M+H-H2O]+
437.363	Diacylglycerols	DG 24:1_[M+H-H2O]+	ST 27:0;O4_[M+H]+
439.3782	Diacylglycerols	DG 24:0_[M+H-H2O]+
454.2928	Phosphatidylethanolamines	LPE 16:0_[M+H]+	LPC 13:0_[M+H]+	LPE O-16:1;O_[M+H]+	LPA 18:1_[M+NH4]+
456.4412	Ceramides	Cer 28:0	FA 28:1;O_[M+NH4]+
461.363	Diacylglycerols	DG 26:3_[M+H-H2O]+	ST 29:2;O4_[M+H]+
463.3787	Diacylglycerols	DG 26:2_[M+H-H2O]+
465.3943	Diacylglycerols	DG 26:1_[M+H-H2O]+
467.4095	Diacylglycerols	DG 26:0_[M+H-H2O]+
471.3081	Phosphatidylglycerols	LPG O-16:0_[M+H]+	ST 27:2;O5_[M+Na]+	ST 28:1;O5_[M+Na]+
474.2615	Phosphatidylethanolamines	LPE 18:4_[M+H]+	LPA 20:5_[M+NH4]+
478.3292	Phosphatidylethanolamines	LPE 19:0_[M+H-H2O]+	LPC 16:0_[M+H-H2O]+	PE O-19:1;O_[M+H]+	LPE O-19:1;O_[M+H-H2O]+	PC O-16:0_[M+H-H2O]+
478.3297	Phosphatidylcholines	LPC 16:0_[M+H-H2O]+	LPE 19:0_[M+H-H2O]+	PE O-19:1;O_[M+H]+	LPE O-19:1;O_[M+H-H2O]+	PC O-16:0_[M+H-H2O]+
484.4725	Ceramides	Cer 30:0	FA 29:1;O_[M+NH4]+
489.3943	Diacylglycerols	DG 28:3_[M+H-H2O]+
491.4095	Diacylglycerols	DG 28:2_[M+H-H2O]+	ST 31:1;O4_[M+H]+
493.4251	Diacylglycerols	DG 28:1_[M+H-H2O]+
495.4408	Diacylglycerols	DG 28:0_[M+H-H2O]+
496.267	Phosphatidylserines	LPS 16:1_[M+H]+
496.3398	Phosphatidylcholines	PC O-16:0_[M+H]+	LPE 19:0_[M+H]+	LPC 16:0_[M+H]+	LPE O-19:1;O_[M+H]+	CAR 22:5_[M+Na]+
496.3404	Phosphatidylcholines	LPC 16:0_[M+H]+	LPE 19:0_[M+H]+	LPE O-19:1;O_[M+H]+	PC O-16:0_[M+H]+	CAR 22:5_[M+Na]+
499.303	Phosphatidylglycerols	LPG 17:0_[M+H]+
509.4564	Diacylglycerols	DG 29:0_[M+H-H2O]+	FAHFA 32:2;O_[M+H]+
512.5038	Ceramides	Cer 32:0;O2_[M+H]+
519.4408	Diacylglycerols	DG 30:2_[M+H-H2O]+	FAHFA 33:4;O_[M+H]+
520.3398	Phosphatidylcholines	LPC 18:2_[M+H]+	LPS O-20:1_[M+H-H2O]+	PC 18:0_[M+H-H2O]+
520.5088	Ceramides	Cer 34:1;O2_[M+H-H2O]+	FA 34:3_[M+NH4]+	WE 34:3_[M+NH4]+
521.4569	Diacylglycerols	DG 30:1_[M+H-H2O]+	DG 30:1_[M+H-H2O]+
522.3559	Phosphatidylcholines	LPC 18:1_[M+H]+	PC O-18:1_[M+H]+	LPS O-20:0_[M+H-H2O]+
523.4721	Diacylglycerols	DG 30:0_[M+H-H2O]+
524.3716	Phosphatidylcholines	LPC 18:0_[M+H]+	PC O-18:0_[M+H]+	LPE 21:0_[M+H]+
531.2693	Phosphatidylglycerols	LPG 18:2_[M+Na]+	PA 21:1;O_[M+Na]+
532.3398	Phosphatidylcholines	LPC 19:3_[M+H]+	PC 19:1_[M+H-H2O]+
535.4721	Diacylglycerols	DG 31:1_[M+H-H2O]+
537.4877	Diacylglycerols	DG 31:0_[M+H-H2O]+	FAHFA 34:2;O_[M+H]+
540.5351	Ceramides	Cer 34:0;O2_[M+H]+
543.4408	Diacylglycerols	DG 32:4_[M+H-H2O]+
544.3398	Phosphatidylcholines	LPC 20:4_[M+H]+
544.3609	Phosphatidylglycerols	LPG 19:0_[M+NH4]+
544.3973	Phosphatidylglycerols	LPG O-20:0_[M+NH4]+
545.4564	Diacylglycerols	DG 32:3_[M+H-H2O]+
547.4721	Diacylglycerols	DG 32:2_[M+H-H2O]+	FAHFA 35:4;O_[M+H]+
548.5038	Ceramides	Cer 35:2;O3_[M+H-H2O]+
549.4877	Diacylglycerols	DG 32:1_[M+H-H2O]+
551.5034	Diacylglycerols	DG 32:0_[M+H-H2O]+	DG O-32:2_[M+H]+
552.3296	Phosphatidylserines	LPS 20:1_[M+H]+	LPG 20:3_[M+NH4]+	PE 21:1;O_[M+H]+	PA 23:2;O_[M+NH4]+
561.4877	Diacylglycerols	DG 33:2_[M+H-H2O]+	FAHFA 36:4;O_[M+H]+
562.5194	Ceramides	Cer 36:3;O2_[M+H]+	Cer 36:2;O3_[M+H-H2O]+
563.5034	Diacylglycerols	DG 33:1_[M+H-H2O]+
565.519	Diacylglycerols	DG 33:0_[M+H-H2O]+	FAHFA 36:2;O_[M+H]+
567.3656	Phosphatidylglycerols	LPG 22:1_[M+H]+
568.5664	Ceramides	Cer 36:0;O2_[M+H]+
570.5092	Diacylglycerols	DG 31:1_[M+NH4]+	Cer 34:1;O4_[M+H]+
571.4721	Diacylglycerols	DG 34:4_[M+H-H2O]+
573.3034	Phosphatidylinositols	LPI 16:0_[M+H]+
573.4877	Diacylglycerols	DG 34:3_[M+H-H2O]+
575.5034	Diacylglycerols	DG 34:2_[M+H-H2O]+	FAHFA 37:4;O_[M+H]+
577.519	Diacylglycerols	DG 34:1_[M+H-H2O]+	FOH 37:4;O3_[M+H]+	DG 35:2_[M+H-H2O]+
579.5347	Diacylglycerols	DG 34:0_[M+H-H2O]+
589.519	Diacylglycerols	DG 35:2_[M+H-H2O]+	FAHFA 38:4;O_[M+H]+
591.5347	Diacylglycerols	DG 35:1_[M+H-H2O]+
592.3978	Phosphatidylcholines	PC 22:1_[M+H]+	LPS O-24:1;O_[M+H-H2O]+
595.4721	Diacylglycerols	DG 36:6_[M+H-H2O]+
597.4877	Diacylglycerols	DG 36:5_[M+H-H2O]+
599.5034	Diacylglycerols	DG 36:4_[M+H-H2O]+
601.519	Diacylglycerols	DG 36:3_[M+H-H2O]+
603.5347	Diacylglycerols	DG 36:2_[M+H-H2O]+	DG O-36:4_[M+H]+
604.382	Phosphatidylinositols	LPI O-18:0_[M+NH4]+
604.6027	Ceramides	Cer 40:1;O2_[M+H-H2O]+	WE 40:3_[M+NH4]+
605.5503	Diacylglycerols	DG 36:1_[M+H-H2O]+
608.465	Phosphatidylcholines	LPC 24:0_[M+H]+	LPE O-27:1;O_[M+H]+	PA O-29:1_[M+NH4]+
613.519	Diacylglycerols	DG 37:4_[M+H-H2O]+
616.6027	Ceramides	Cer 41:2;O2_[M+H-H2O]+
618.3613	Phosphatidylinositols	LPI 18:0_[M+NH4]+
621.4877	Diacylglycerols	DG 38:7_[M+H-H2O]+	DG O-38:9_[M+H]+
622.541	Diacylglycerols	DG 35:3_[M+NH4]+
623.5034	Diacylglycerols	DG 38:6_[M+H-H2O]+	DG O-38:8_[M+H]+
625.519	Diacylglycerols	DG 38:5_[M+H-H2O]+
627.3996	Phosphatidic acids	PA 29:1_[M+Na]+
627.5347	Diacylglycerols	DG 38:4_[M+H-H2O]+
631.566	Diacylglycerols	DG 38:2_[M+H-H2O]+
633.5816	Diacylglycerols	DG 38:1_[M+H-H2O]+
634.5194	Ceramides	Cer 42:9
637.519	Diacylglycerols	DG 39:6_[M+H-H2O]+
641.2697	Phosphatidylinositols	LPI 20:5_[M+Na]+
642.4341	Phosphatidylglycerols	PG 25:0_[M+NH4]+
645.5816	Diacylglycerols	DG 39:2_[M+H-H2O]+
647.5973	Diacylglycerols	DG 39:1_[M+H-H2O]+
649.384	Phosphatidic acids	PA 31:4_[M+Na]+
649.519	Diacylglycerols	DG 40:7_[M+H-H2O]+	DG O-40:9_[M+H]+
651.5347	Diacylglycerols	DG 40:6_[M+H-H2O]+	DG O-40:8_[M+H]+
653.4388	Phosphatidylglycerols	PG 27:0_[M+H]+
653.5503	Diacylglycerols	DG 40:5_[M+H-H2O]+
655.566	Diacylglycerols	DG 40:4_[M+H-H2O]+
664.4548	Phosphatidylserines	PS O-28:1_[M+H]+
667.4309	Phosphatidic acids	PA 32:2_[M+Na]+
672.4599	Phosphatidylcholines	PC 28:3	PE 31:3_[M+H]+	PS O-30:2_[M+H-H2O]+	PA 33:4_[M+NH4]+
673.519	Diacylglycerols	DG 42:9_[M+H-H2O]+
675.5436	Sphingomyelins	SM 32:1;O2_[M+H]+	EPC 35:1;O2_[M+H]+
677.5503	Diacylglycerols	DG 42:7_[M+H-H2O]+
679.4309	Phosphatidic acids	PA 33:3_[M+Na]+
679.566	Diacylglycerols	DG 42:6_[M+H-H2O]+
680.4291	Phosphatidylethanolamines	PE 32:6
681.5816	Diacylglycerols	DG 42:5_[M+H-H2O]+
682.4811	Phosphatidylcholines	PC O-30:5	PC 30:3_[M+H-H2O]+	PE 33:3_[M+H-H2O]+
683.5973	Diacylglycerols	DG 42:4_[M+H-H2O]+
684.6137	Triacylglycerols	TG 38:0_[M+NH4]+
689.4728	Phosphatidylglycerols	PG O-29:0_[M+Na]+
689.5592	Sphingomyelins	SM 33:1;O2_[M+H]+	EPC 36:1;O2_[M+H]+	EPC 36:0;O3_[M+H-H2O]+
690.5437	Phosphatidylcholines	PC O-30:1_[M+H]+	PE O-33:1_[M+H]+	PA O-35:2_[M+NH4]+
692.5594	Phosphatidylcholines	PC O-30:0_[M+H]+	PE O-33:0_[M+H]+	PA O-35:1_[M+NH4]+
693.5816	Diacylglycerols	DG 43:6_[M+H-H2O]+	ST 46:4;O5_[M+H-H2O]+
698.4755	Phosphatidylcholines	PC 30:4_[M+H]+	PA 35:5_[M+NH4]+	PE 33:4_[M+H]+
700.4912	Phosphatidylcholines	PC 30:3_[M+H]+	PA 35:4_[M+NH4]+	PE 33:3_[M+H]+	PS O-32:2_[M+H-H2O]+
701.4364	Phosphatidylglycerols	PG 29:1_[M+Na]+
701.5592	Sphingomyelins	SM 34:2;O2_[M+H]+	EPC 37:2;O2_[M+H]+	EPC 37:1;O3_[M+H-H2O]+	SM 34:1;O3_[M+H-H2O]+	PE dO-34:4_[M+NH4]+
702.5672	Triacylglycerols	TG 40:5
703.5749	Sphingomyelins	SM 34:1;O2_[M+H]+	EPC 37:1;O2_[M+H]+
704.523	Phosphatidylcholines	PC 30:1_[M+H]+	PE 33:1_[M+H]+	PS O-32:0_[M+H-H2O]+	PA 35:2_[M+NH4]+
704.5828	Triacylglycerols	TG 40:4
705.5816	Diacylglycerols	DG 44:7_[M+H-H2O]+
706.4811	Phosphatidylcholines	PC 32:5_[M+H-H2O]+	PE 35:5_[M+H-H2O]+
706.5017	Phosphatidylserines	PS O-31:1_[M+H]+
706.5387	Phosphatidylcholines	PC 30:0_[M+H]+	PE 33:0_[M+H]+	PE-NMe 32:0_[M+H]+	PA 35:1_[M+NH4]+
707.5973	Diacylglycerols	DG 44:6_[M+H-H2O]+
711.6286	Diacylglycerols	DG 44:4_[M+H-H2O]+
712.4524	Phosphatidylserines	PS O-30:2_[M+Na]+
712.4917	Phosphatidylethanolamines	PE 34:4_[M+H]+	PC 31:4_[M+H]+	PS O-33:3_[M+H-H2O]+	PA 36:5_[M+NH4]+
712.645	Triacylglycerols	TG 40:0_[M+NH4]+
713.4153	Phosphatidic acids	PA 36:7_[M+Na]+
713.6442	Diacylglycerols	DG 44:3_[M+H-H2O]+
714.6241	Triacylglycerols	TG 39:0;O
715.4309	Phosphatidic acids	PA 36:6_[M+Na]+
716.5225	Phosphatidylethanolamines	PE 34:2_[M+H]+	PA 36:3_[M+NH4]+	PC 31:2_[M+H]+	PS O-33:1_[M+H-H2O]+
717.5905	Sphingomyelins	SM 35:1;O2_[M+H]+	EPC 38:1;O2_[M+H]+
718.5387	Phosphatidylethanolamines	PE 34:1_[M+H]+	PC 31:1_[M+H]+	PS O-33:0_[M+H-H2O]+	PA 36:2_[M+NH4]+
718.575	Phosphatidylcholines	PC O-32:1_[M+H]+	PE O-35:1_[M+H]+	PA O-37:2_[M+NH4]+
719.4622	Phosphatidic acids	PA 36:4_[M+Na]+
720.5543	Phosphatidylethanolamines	PE 34:0_[M+H]+	PC 31:0_[M+H]+	PE-NMe2 32:0_[M+H]+	PA 36:1_[M+NH4]+
720.5907	Phosphatidylcholines	PC O-32:0_[M+H]+	PE O-35:0_[M+H]+	PA O-37:1_[M+NH4]+
721.5894	Cholesteryl esters	CE 22:5_[M+Na]+
722.5928	Triacylglycerols	TG 40:3;O	HexCer 37:2;O2_[M+H-H2O]+
724.5276	Phosphatidylethanolamines	PE O-36:5_[M+H]+	PC 33:3_[M+H-H2O]+	PE 36:3_[M+H-H2O]+	PA O-38:6_[M+NH4]+
726.6606	Triacylglycerols	TG 41:0_[M+NH4]+	Cer 44:1;O5_[M+H]+
728.523	Phosphatidylcholines	PC 32:3_[M+H]+	PE 35:3_[M+H]+	PS O-34:2_[M+H-H2O]+	PA 37:4_[M+NH4]+
729.5905	Sphingomyelins	SM 36:2;O2_[M+H]+	EPC 39:2;O2_[M+H]+
730.5387	Phosphatidylcholines	PC 32:2_[M+H]+	PE 35:2_[M+H]+	PS O-34:1_[M+H-H2O]+	PA 37:3_[M+NH4]+
730.5985	Triacylglycerols	TG 42:5
731.6062	Sphingomyelins	SM 36:1;O2_[M+H]+	EPC 39:1;O2_[M+H]+
732.5543	Phosphatidylcholines	PC 32:1_[M+H]+	PE 35:1_[M+H]+	PE-NMe 34:1_[M+H]+	PS O-34:0_[M+H-H2O]+	PA 37:2_[M+NH4]+	PG dO-34:4_[M+NH4]+
733.6134	Diacylglycerols	DG 46:7_[M+H-H2O]+
734.57	Phosphatidylcholines	PC 32:0_[M+H]+	PE 35:0_[M+H]+	PA 37:1_[M+NH4]+
736.645	Triacylglycerols	TG 42:2_[M+NH4]+
739.5847	Triacylglycerols	TG 42:3_[M+Na]+
740.523	Phosphatidylethanolamines	PE 36:4_[M+H]+	PC 33:4_[M+H]+	PE O-36:5;O_[M+H]+	PS O-35:3_[M+H-H2O]+	PA 38:5_[M+NH4]+
740.6763	Triacylglycerols	TG 42:0_[M+NH4]+
742.5387	Phosphatidylethanolamines	PE 36:3_[M+H]+	PC 33:3_[M+H]+	PS O-35:2_[M+H-H2O]+	PA 38:4_[M+NH4]+
743.4834	Phosphatidylglycerols	PG 32:1_[M+Na]+
744.5543	Phosphatidylethanolamines	PE 36:2_[M+H]+	PC 33:2_[M+H]+	PS O-35:1_[M+H-H2O]+	PA 38:3_[M+NH4]+
744.5902	Phosphatidylcholines	PC O-34:2_[M+H]+	PE O-37:2_[M+H]+	PC O-34:2_[M+H]+	PC 34:0_[M+H-H2O]+	PE 37:0_[M+H-H2O]+	PE-NMe 36:0_[M+H-H2O]+
745.6218	Sphingomyelins	SM 37:1;O2_[M+H]+	EPC 40:1;O2_[M+H]+	CerP 42:2;O2_[M+NH4]+
746.57	Phosphatidylethanolamines	PE 36:1_[M+H]+	PC 33:1_[M+H]+	PE-NMe2 34:1_[M+H]+	PS O-35:0_[M+H-H2O]+	PA 38:2_[M+NH4]+
746.6063	Phosphatidylcholines	PC O-34:1_[M+H]+	PE O-37:1_[M+H]+	PA O-39:2_[M+NH4]+
747.5171	Phosphatidylglycerols	PG 34:2_[M+H]+	LBPA 34:2_[M+H]+
748.5276	Phosphatidylethanolamines	PE O-38:7_[M+H]+	PC 35:5_[M+H-H2O]+	PE 38:5_[M+H-H2O]+	PE O-38:6;O_[M+H-H2O]+
749.5327	Phosphatidylglycerols	PG 34:1_[M+H]+	LBPA 34:1_[M+H]+
750.5432	Phosphatidylethanolamines	PE O-38:6_[M+H]+	PC 35:4_[M+H-H2O]+	PE 38:4_[M+H-H2O]+	PE O-38:5;O_[M+H-H2O]+	PA O-40:7_[M+NH4]+
751.5484	Phosphatidylglycerols	PG 34:0_[M+H]+
752.4837	Phosphatidylserines	PS O-33:3_[M+Na]+
752.5589	Phosphatidylethanolamines	PE O-38:5_[M+H]+	PC 35:3_[M+H-H2O]+	PE 38:3_[M+H-H2O]+	PA O-40:6_[M+NH4]+
754.5387	Phosphatidylcholines	PC 34:4_[M+H]+	PE 37:4_[M+H]+	PS O-36:3_[M+H-H2O]+	PA 39:5_[M+NH4]+
755.4858	Phosphatidylglycerols	PG 35:5_[M+H]+
756.481	Phosphatidylserines	PS 34:4_[M+H]+	PG 34:6_[M+NH4]+
756.5543	Phosphatidylcholines	PC 34:3_[M+H]+	PE 37:3_[M+H]+	PS O-36:2_[M+H-H2O]+	PA 39:4_[M+NH4]+
757.5014	Phosphatidylglycerols	PG 35:4_[M+H]+
757.6218	Sphingomyelins	SM 38:2;O2_[M+H]+
757.6833	Cholesteryl esters	CE 24:1_[M+Na]+
758.4967	Phosphatidylserines	PS 34:3_[M+H]+	PG 34:5_[M+NH4]+
758.57	Phosphatidylcholines	PC 34:2_[M+H]+	PE 37:2_[M+H]+	PE-NMe 36:2_[M+H]+	PS O-36:1_[M+H-H2O]+	PA 39:3_[M+NH4]+
758.6293	Triacylglycerols	TG 44:5_[M+NH4]+
759.6375	Sphingomyelins	SM 38:1;O2_[M+H]+
760.5856	Phosphatidylcholines	PC 34:1_[M+H]+	PE 37:1_[M+H]+	PS O-36:0_[M+H-H2O]+	PA 39:2_[M+NH4]+
760.645	Triacylglycerols	TG 44:4_[M+NH4]+
761.6532	Sphingomyelins	SM 38:0;O2_[M+H]+
764.523	Phosphatidylethanolamines	PE 38:6_[M+H]+	PC 35:6_[M+H]+	PE O-38:7;O_[M+H]+	PE 38:5;O_[M+H-H2O]+	PA 40:7_[M+NH4]+
766.6919	Triacylglycerols	TG 44:1_[M+NH4]+
768.5902	Phosphatidylcholines	PC O-36:4_[M+H]+	PC 36:2_[M+H-H2O]+	PE 39:2_[M+H-H2O]+
768.7076	Triacylglycerols	TG 44:0_[M+NH4]+
770.6298	Triacylglycerols	TG 45:6
771.5171	Phosphatidylglycerols	PG 36:4_[M+H]+
772.4971	Phosphatidylinositols	PI 28:0_[M+NH4]+
772.5857	Phosphatidylethanolamines	PE 38:2_[M+H]+	PC 35:2_[M+H]+	PE-NMe2 36:2_[M+H]+	PS O-37:1_[M+H-H2O]+	PA 40:3_[M+NH4]+
773.5303	Phosphatidylglycerols	PG 34:0_[M+Na]+
774.5432	Phosphatidylethanolamines	PE O-40:8_[M+H]+	PC 37:6_[M+H-H2O]+	PE 40:6_[M+H-H2O]+	PE O-40:7;O_[M+H-H2O]+
774.6376	Phosphatidylcholines	PC O-36:1_[M+H]+	PE O-39:1_[M+H]+
775.4732	Phosphatidylinositols	PI O-29:1_[M+Na]+
775.5484	Phosphatidylglycerols	PG 36:2_[M+H]+	LBPA 36:2_[M+H]+
776.5225	Phosphatidylcholines	PC 36:7_[M+H]+	PE 39:7_[M+H]+	PS O-38:6_[M+H-H2O]+
777.564	Phosphatidylglycerols	PG 36:1_[M+H]+
777.5906	Sphingomyelins	SM(40:6)	PE dO-40:8_[M+NH4]+
778.5745	Phosphatidylethanolamines	PE O-40:6_[M+H]+	PC 37:4_[M+H-H2O]+	PE 40:4_[M+H-H2O]+	PA O-42:7_[M+NH4]+
779.5797	Phosphatidylglycerols	PG 36:0_[M+H]+
780.5543	Phosphatidylcholines	PC 36:5_[M+H]+	PE 39:5_[M+H]+	PC 36:4;O_[M+H-H2O]+	PS O-38:4_[M+H-H2O]+	PA 41:6_[M+NH4]+
782.57	Phosphatidylcholines	PC 36:4_[M+H]+	PE 39:4_[M+H]+	PS O-38:3_[M+H-H2O]+	PA 41:5_[M+NH4]+
782.6063	Phosphatidylcholines	PC O-37:4_[M+H]+	PE O-40:4_[M+H]+	PC 37:2_[M+H-H2O]+	PE 40:2_[M+H-H2O]+	PA O-42:5_[M+NH4]+
782.6298	Triacylglycerols	TG 46:7
783.6375	Sphingomyelins	SM 40:3;O2_[M+H]+
784.4971	Phosphatidylinositols	PI 29:1_[M+NH4]+
784.5856	Phosphatidylcholines	PC 36:3_[M+H]+	PE 39:3_[M+H]+	PS O-38:2_[M+H-H2O]+	PA 41:4_[M+NH4]+
784.6215	Phosphatidylethanolamines	PC O-37:3_[M+H]+	PE O-40:3_[M+H]+	PC 37:1_[M+H-H2O]+	PE 40:1_[M+H-H2O]+	PA O-42:4_[M+NH4]+
784.645	Triacylglycerols	TG 46:6_[M+NH4]+
785.6531	Sphingomyelins	SM 40:2;O2_[M+H]+	PC dO-37:4_[M+NH4]+
786.6013	Phosphatidylcholines	PC 36:2_[M+H]+	PE 39:2_[M+H]+	PS O-38:1_[M+H-H2O]+	PA 41:3_[M+NH4]+
786.6606	Triacylglycerols	TG 46:5_[M+NH4]+
787.6688	Sphingomyelins	SM 40:1;O2_[M+H]+
788.5225	Phosphatidylethanolamines	PE 40:8_[M+H]+	PA 42:9_[M+NH4]+
788.6169	Phosphatidylcholines	PC 36:1_[M+H]+	PE 39:1_[M+H]+	PS O-38:0_[M+H-H2O]+	PA 41:2_[M+NH4]+
788.6763	Triacylglycerols	TG 46:4_[M+NH4]+
790.5381	Phosphatidylethanolamines	PE 40:7_[M+H]+	PA 42:8_[M+NH4]+	PC 37:7_[M+H]+	PE 40:6;O_[M+H-H2O]+
792.5543	Phosphatidylethanolamines	PE 40:6_[M+H]+	PC 37:6_[M+H]+	PE O-40:7;O_[M+H]+	PA 42:7_[M+NH4]+
793.5014	Phosphatidylglycerols	PG 38:7_[M+H]+
794.57	Phosphatidylethanolamines	PE 40:5_[M+H]+	PC 37:5_[M+H]+	PA 42:6_[M+NH4]+
794.7232	Triacylglycerols	TG 46:1_[M+NH4]+
795.6473	Triacylglycerols	TG 46:3_[M+Na]+
796.5857	Phosphatidylethanolamines	PE 40:4_[M+H]+	PC 37:4_[M+H]+	PA 42:5_[M+NH4]+
796.7389	Triacylglycerols	TG 46:0_[M+NH4]+
797.5092	Phosphatidic acids	PA 42:7_[M+Na]+
797.5175	Phosphatidylinositols	PI 31:0_[M+H]+	MGDG 36:6_[M+Na]+
798.5619	Phosphatidylserines	PS O-36:1_[M+Na]+
800.6169	Phosphatidylethanolamines	PE 40:2_[M+H]+	PC 37:2_[M+H]+	PS O-39:1_[M+H-H2O]+	PA 42:3_[M+NH4]+
801.6844	Sphingomyelins	SM 41:1;O2_[M+H]+
801.6943	Triacylglycerols	TG 46:0_[M+Na]+
802.5956	Phosphatidylserines	PS O-38:2_[M+H]+	PG O-38:4_[M+NH4]+	PS 38:0_[M+H-H2O]+
803.5197	Phosphatidylglycerols	PG O-38:6_[M+Na]+
804.5544	Phosphatidylcholines	PC 38:7_[M+H]+	PE 41:7_[M+H]+	PS O-40:6_[M+H-H2O]+
804.5902	Phosphatidylethanolamines	PE O-42:7_[M+H]+	PC 39:5_[M+H-H2O]+	PE 42:5_[M+H-H2O]+
804.6113	Phosphatidylserines	PS O-38:1_[M+H]+	PG O-38:3_[M+NH4]+
806.57	Phosphatidylcholines	PC 38:6_[M+H]+	PE 41:6_[M+H]+	PS O-40:5_[M+H-H2O]+	PG dO-40:9_[M+NH4]+
809.6532	Sphingomyelins	SM 42:4
810.6013	Phosphatidylcholines	PC 38:4_[M+H]+	PE 41:4_[M+H]+	PS O-40:3_[M+H-H2O]+
810.6371	Phosphatidylethanolamines	PE O-42:4_[M+H]+	PC 39:2_[M+H-H2O]+	PE 42:2_[M+H-H2O]+
811.6688	Sphingomyelins	SM 42:3;O2_[M+H]+
812.5436	Phosphatidylserines	PS 38:4_[M+H]+	PG 38:6_[M+NH4]+	PC 36:5;O2_[M+H]+	PC 36:4;O3_[M+H-H2O]+
812.6763	Triacylglycerols	TG 48:6_[M+NH4]+
813.6844	Sphingomyelins	SM 42:2;O2_[M+H]+
814.5381	Phosphatidylethanolamines	PE 42:9_[M+H]+	PA 44:10_[M+NH4]+
814.5593	Phosphatidylserines	PS 38:3_[M+H]+	PG 38:5_[M+NH4]+	PC 36:3;O3_[M+H-H2O]+
814.6919	Triacylglycerols	TG 48:5_[M+NH4]+
815.7001	Sphingomyelins	SM 42:1;O2_[M+H]+
816.5543	Phosphatidylethanolamines	PE 42:8_[M+H]+	PC 39:8_[M+H]+
816.5749	Phosphatidylserines	PS 38:2_[M+H]+	PG 38:4_[M+NH4]+
816.5907	Phosphatidylcholines	PC O-40:8_[M+H]+	PC 40:6_[M+H-H2O]+	PE 43:6_[M+H-H2O]+
816.7076	Triacylglycerols	TG 48:4_[M+NH4]+
817.5225	Phosphatidylinositols	PI O-34:4_[M+H]+	PI 34:2_[M+H-H2O]+
818.5306	Phosphatidylserines	PS O-38:5_[M+Na]+
818.57	Phosphatidylethanolamines	PE 42:7_[M+H]+	PC 39:7_[M+H]+	PA 44:8_[M+NH4]+
820.5099	Phosphatidylserines	PS 37:4_[M+Na]+
820.5851	Phosphatidylethanolamines	PE 42:6_[M+H]+	PA 44:7_[M+NH4]+	PC 39:6_[M+H]+
820.622	Phosphatidylcholines	PC O-40:6_[M+H]+	PC 40:4_[M+H-H2O]+	PE 43:4_[M+H-H2O]+
820.7389	Triacylglycerols	TG 48:2_[M+NH4]+
822.7545	Triacylglycerols	TG 48:1_[M+NH4]+
823.5248	Phosphatidic acids	PA 44:8_[M+Na]+
824.5436	Phosphatidylserines	PS 39:5_[M+H]+	PG 39:7_[M+NH4]+
824.7702	Triacylglycerols	TG 48:0_[M+NH4]+
828.5538	Phosphatidylcholines	PC 40:9_[M+H]+
830.5694	Phosphatidylcholines	PC 40:8_[M+H]+	PS O-42:7_[M+H-H2O]+
831.5358	Phosphatidylinositols	PI O-33:1_[M+Na]+
834.6013	Phosphatidylcholines	PC 40:6_[M+H]+	PE 43:6_[M+H]+	PS O-42:5_[M+H-H2O]+
834.7545	Triacylglycerols	TG 49:2_[M+NH4]+
836.5412	Phosphatidylserines	PS 38:3_[M+Na]+
836.6164	Phosphatidylcholines	PC 40:5_[M+H]+	PS O-42:4_[M+H-H2O]+
837.5488	Phosphatidylinositols	PI 34:1_[M+H]+
838.5569	Phosphatidylserines	PS 38:2_[M+Na]+
838.6326	Phosphatidylcholines	PC 40:4_[M+H]+	PE 43:4_[M+H]+	PS O-42:3_[M+H-H2O]+
844.7389	Triacylglycerols	TG 50:4_[M+NH4]+
846.7545	Triacylglycerols	TG 50:3_[M+NH4]+
848.7702	Triacylglycerols	TG 50:2_[M+NH4]+
850.7858	Triacylglycerols	TG 50:1_[M+NH4]+
858.6007	Phosphatidylcholines	PC 42:8_[M+H]+
866.6633	Phosphatidylcholines	PC 42:4_[M+H]+
870.7545	Triacylglycerols	TG 52:5_[M+NH4]+
872.7702	Triacylglycerols	TG 52:4_[M+NH4]+
873.7784	Sphingomyelins	SM 46:0
874.7858	Triacylglycerols	TG 52:3_[M+NH4]+
876.8015	Triacylglycerols	TG 52:2_[M+NH4]+
878.5753	Phosphatidylinositols	PI 36:3_[M+NH4]+
878.8171	Triacylglycerols	TG 52:1_[M+NH4]+
885.5827	Phosphatidylinositols	PI O-37:2_[M+Na]+
887.5644	Phosphatidylinositols	PI 38:4_[M+H]+	Glc-GP 38:4_[M+H]+
890.7002	Phosphatidylcholines	PC O-45:6
896.7702	Triacylglycerols	TG 54:6_[M+NH4]+
898.7858	Triacylglycerols	TG 54:5_[M+NH4]+
899.7941	Sphingomyelins	SM 48:1
900.8015	Triacylglycerols	TG 54:4_[M+NH4]+
902.8171	Triacylglycerols	TG 54:3_[M+NH4]+
904.8332	Triacylglycerols	TG 54:2_[M+NH4]+
920.6223	Phosphatidylinositols	PI 39:3_[M+NH4]+
920.7706	Triacylglycerols	TG 56:8_[M+NH4]+
922.7858	Triacylglycerols	TG 56:7_[M+NH4]+
924.8015	Triacylglycerols	TG 56:6_[M+NH4]+
926.8171	Triacylglycerols	TG 56:5_[M+NH4]+
928.8328	Triacylglycerols	TG 56:4_[M+NH4]+
934.6379	Phosphatidylinositols	PI 40:3_[M+NH4]+
948.8015	Triacylglycerols	TG 58:8_[M+NH4]+
1006.7493	Triacylglycerols	TG 62:3;O
