# Supplementary material for: Maternal diet-induced obesity during pregnancy alters lipid supply to mouse E18.5 fetuses and changes the cardiac tissue lipidome in a sex-dependent manner
Source: eLife. 2022 Jan 13;11:e69078. doi: 10.7554/eLife.69078 (PMC8794468; doi:10.7554/eLife.69078)
Supplement: Supplementary file 3. [file elife-69078-supp3.csv]

Shortname	Biochemicalname
C00	Carnitine
C02	Acetylcarnitine
C04	Butyrylcarnitine
C04:1	Butenoylcarnitine
C06	Hexanoylcarnitine
C08:1	Octenoylcarnitine
C08	Octanoylcarnitine
C10	Decanoylcarnitine
C10:1	Decenoylcarnitine
C12	Dodecanoylcarnitine
C12:1	Dodecenoylcarnitine
C14	Tetradecanoylcarnitine
C14:1	Tetradecenoylcarnitine
C16	Hexadecanoylcarnitine
C16:1	Hexadecenoylcarnitine
C16:2	Hexadecadienylcarnitine
C18	Octadecanoylcarnitine
C18:1	Octadecenoylcarnitine
C18:2	Octadecadienylcarnitine
C18:3	Octadecatrienylcarnitine
C20	Arachidylcarnitine
C22:5	Docosapentaenoylcarnitine
C04-OH	Hydroxy-butyrylcarnitine
C05-OH	Hydroxy-valerylcarnitine
C10-OH	Hydroxy-decenoylcarnitine
C12-0H	Hydroxy-dodecanoylcarnitine
C14-OH	Hydroxy-tetradecanoylcarnitine
C16-OH	Hydroxy-hexadecanoylcarnitine
C18-OH	Hydroxy-octadecanoylcarnitine
C03	Propionylcarnitine
C05	Valerylcarnitine
C07	Heptanoylcarnitine
C09	Nonanoylcarnitine
C11	Undecanoylcarnitine
C15	Pentadecanoylcarnitine
C03-DCA	Propionylcarnitine-dicarboxylicacid
C04-DCA	Butyrylcarnitine-dicarboxylicacid
C06-DCA	Hexanoylcarnitine-dicarboxylicacid
