# Supplementary figures and images for: Maternal diet-induced obesity during pregnancy alters lipid supply to mouse E18.5 fetuses and changes the cardiac tissue lipidome in a sex-dependent manner
Source: eLife journal article supplement (doi:10.7554/elife.69078), 2022-01-13

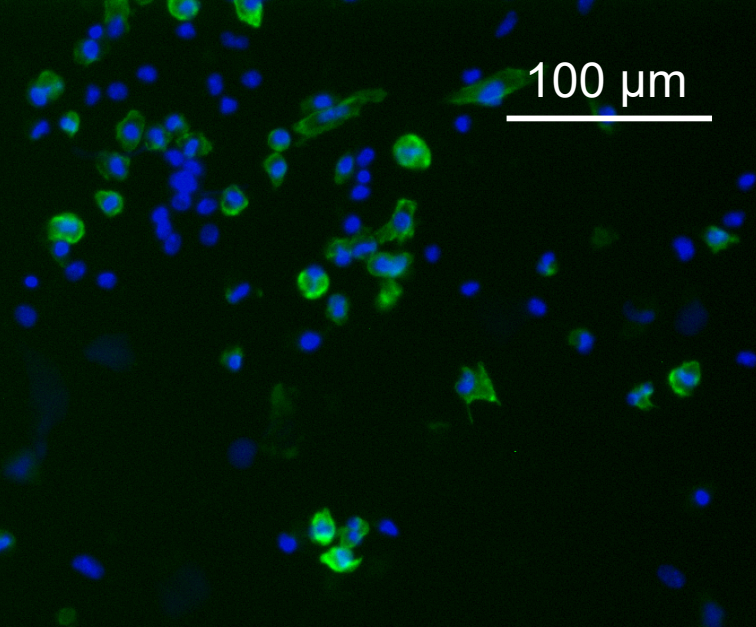

**Cardiac Troponin I**

**DAPI**

Supplement: supp [file elife_poa_e69078_Figure_1_figure_supplement_2.pdf › elife_poa_e69078_Figure_1_figure_supplement_2.pdf]

**A**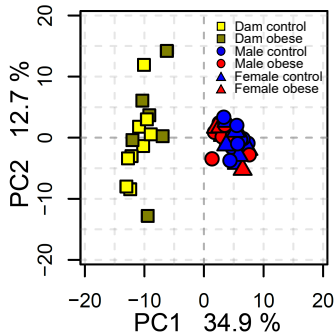**B**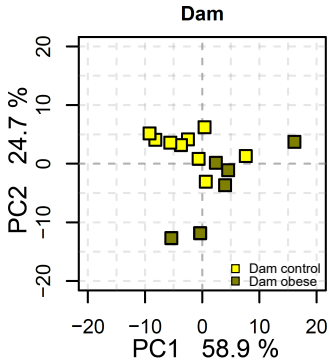**C**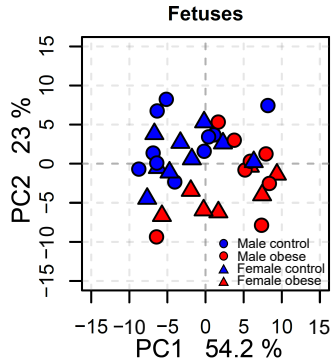

Supplement: supp [file elife_poa_e69078_Figure_2_figure_supplement_1.pdf › elife_poa_e69078_Figure_2_figure_supplement_1.pdf]

A

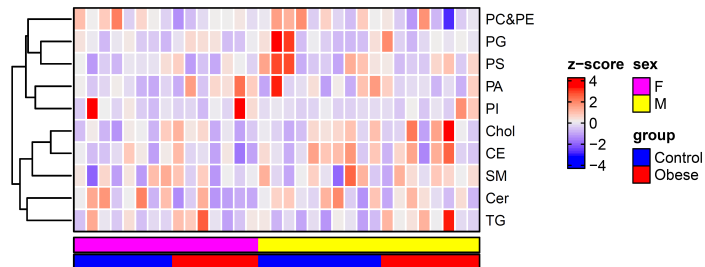

D

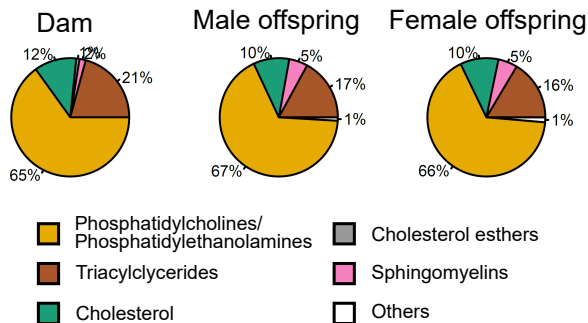

B

Maternal serum vs  
Male offspring serum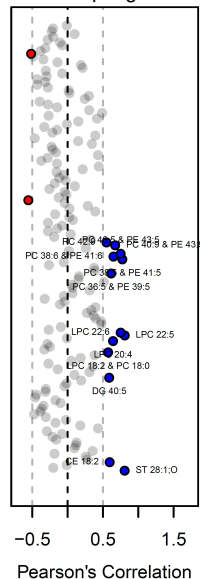

C

Maternal serum vs  
Female offspring serum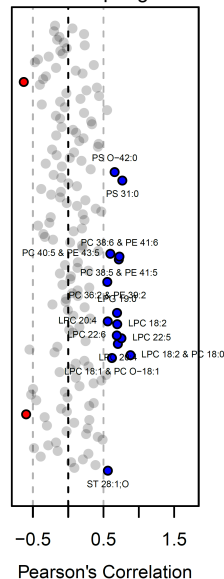

Supplement: supp [file elife_poa_e69078_Figure_2_figure_supplement_2.pdf › elife_poa_e69078_Figure_2_figure_supplement_2.pdf]

# Dam

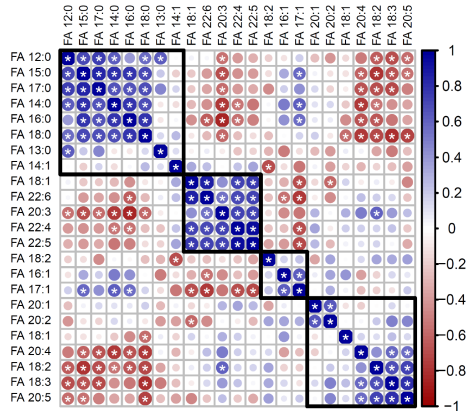

# Male offspring

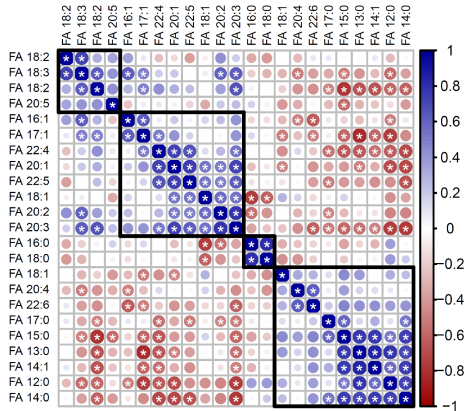

# Female offspring

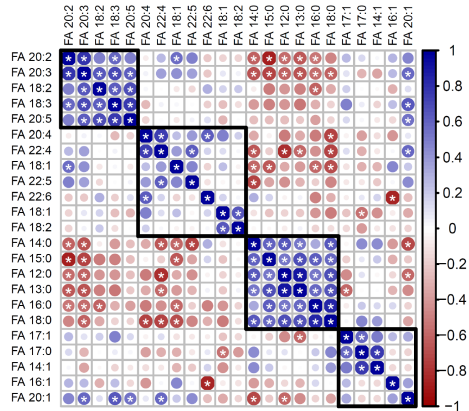

Supplement: supp [file elife_poa_e69078_Figure_3_figure_supplement_2.pdf › elife_poa_e69078_Figure_3_figure_supplement_2.pdf]

**DG 38:5**

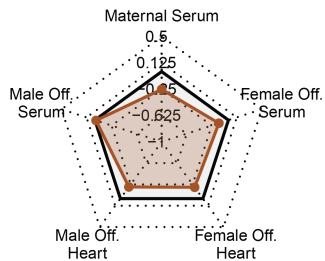

**DG 40:5**

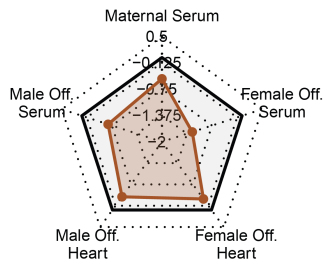

**TG 40:4**

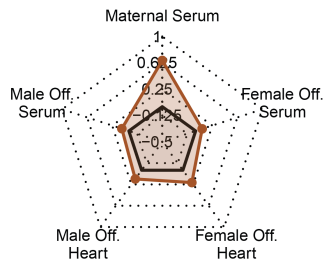

**PC 30:0 & PE 33:0**

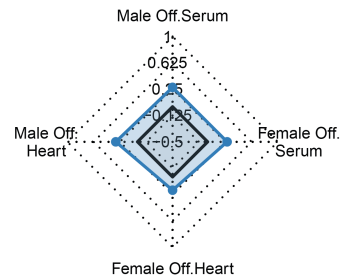

**PC O-32:0 & PE O-35:0**

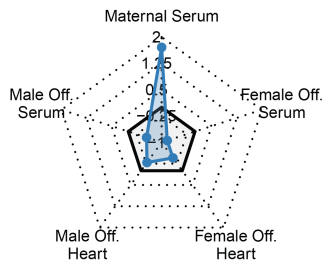

**PC 32:1 & PE 35:1**

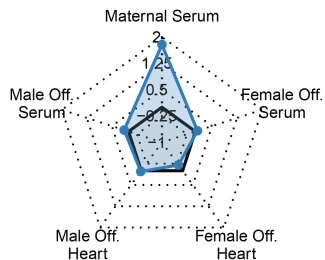

**PC 34:1 & PE 37:1**

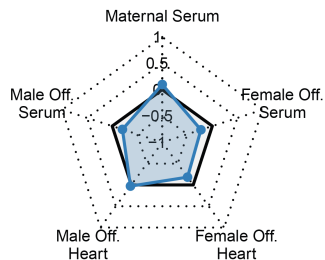

**PC 38:4 & PE 41:4**

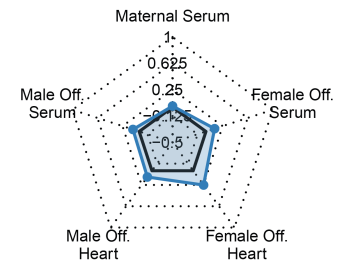

**PC 38:6 & PE 41:6**

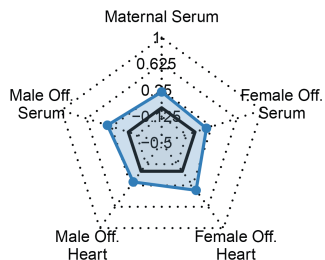

**PC 40:5 & PE 43:5**

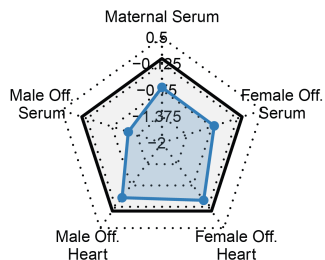

**PC 40:6 & PE 43:6**

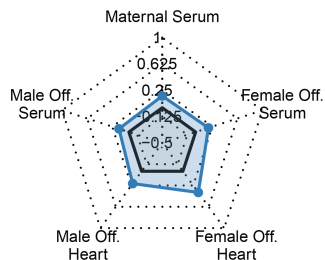

**PE 34:0 & PC 31:0**

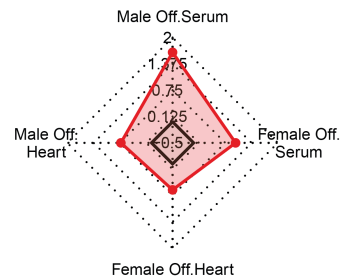

**PE 36:4 & PC 33:4**

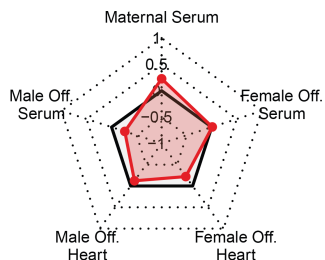

**PE 38:6 & PC 35:6**

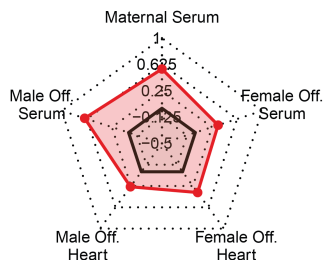

**SM 34:1;O2**

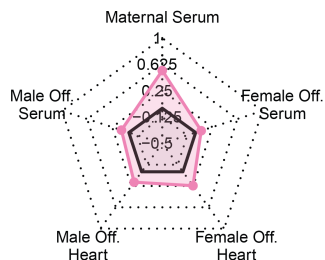

**SM 36:1;O2**

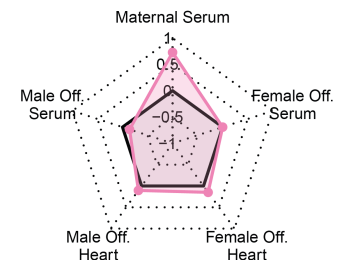

Supplement: supp [file elife_poa_e69078_Figure_4_figure_supplement_1.pdf › elife_poa_e69078_Figure_4_figure_supplement_1.pdf]

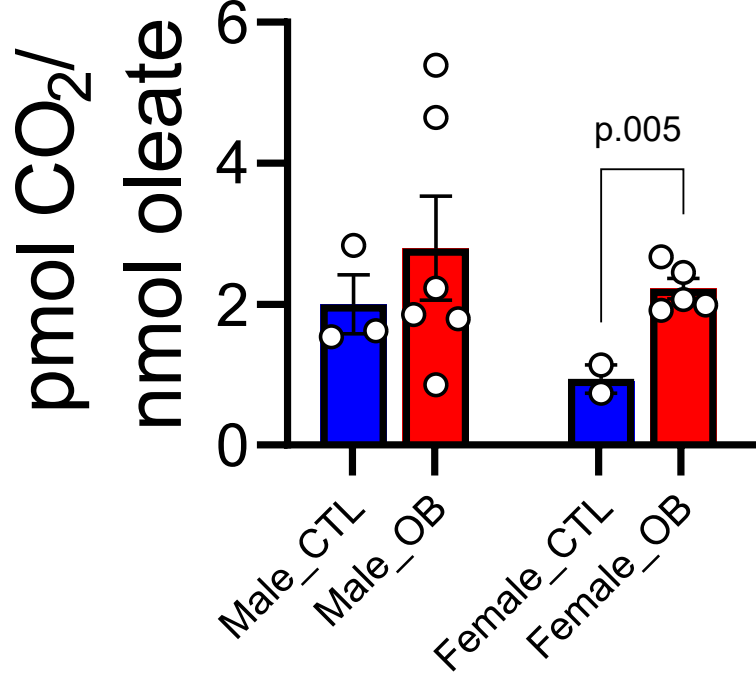

Factorial ANOVA

Sex p=.243

Maternal status p=.145

Supplement: supp [file elife_poa_e69078_Figure_6_figure_supplement_1.pdf › elife_poa_e69078_Figure_6_figure_supplement_1.pdf]
